# Supplementary material for: Specific expression and alternative splicing of mouse genes during spermatogenesis
Source: Royal Society of Chemistry journal article supplement (doi:10.1039/c9mo00163h), 2020-03-10
Supplement: c9mo00163h1.xlsx [file c9mo00163h1.xlsx]

## Sheet: Spermatogonia
ID	GeneID	GeneSymbol	Chr	Strand	Alternative splicing type	Development stage
0	ENSMUSG00000038708	Golga4	chr9	+	A3SS	spermatogonia
1	ENSMUSG00000022838	Eaf2	chr16	-	A3SS	spermatogonia
2	ENSMUSG00000030795	Fus	chr7	+	A3SS	spermatogonia
3	ENSMUSG00000036138	Acaa1a	chr9	+	A3SS	spermatogonia
4	ENSMUSG00000032580	Rbm5	chr9	-	A3SS	spermatogonia
5	ENSMUSG00000036529	Sbf1	chr15	-	A3SS	spermatogonia
6	ENSMUSG00000021504	B4galt7	chr13	+	A3SS	spermatogonia
7	ENSMUSG00000026159	Agfg1	chr1	+	A3SS	spermatogonia
8	ENSMUSG00000032366	Tpm1	chr9	-	A3SS	spermatogonia
9	ENSMUSG00000033382	Trappc8	chr18	-	A3SS	spermatogonia
10	ENSMUSG00000026843	Fubp3	chr2	+	A3SS	spermatogonia
11	ENSMUSG00000033365	Ipo13	chr4	-	A3SS	spermatogonia
12	ENSMUSG00000037440	Vnn1	chr10	+	A3SS	spermatogonia
13	ENSMUSG00000053877	Srcap	chr7	+	A3SS	spermatogonia
14	ENSMUSG00000055491	Pprc1	chr19	+	A3SS	spermatogonia
15	ENSMUSG00000059022	Kcp	chr6	-	A3SS	spermatogonia
16	ENSMUSG00000038685	Rtel1	chr2	+	A3SS	spermatogonia
17	ENSMUSG00000041459	Tardbp	chr4	-	A3SS	spermatogonia
18	ENSMUSG00000032816	Igdcc4	chr9	+	A3SS	spermatogonia
19	ENSMUSG00000034973	Dopey1	chr9	+	A3SS	spermatogonia
20	ENSMUSG00000079557	March2	chr17	-	A3SS	spermatogonia
21	ENSMUSG00000000339	Rtca	chr3	-	A3SS	spermatogonia
22	ENSMUSG00000015869	Prpsap1	chr11	-	A3SS	spermatogonia
23	ENSMUSG00000023345	Poc1a	chr9	+	A3SS	spermatogonia
24	ENSMUSG00000029670	Ing3	chr6	+	A3SS	spermatogonia
25	ENSMUSG00000020198	Ap3d1	chr10	-	A3SS	spermatogonia
26	ENSMUSG00000045409	Trim39	chr17	-	A3SS	spermatogonia
27	ENSMUSG00000030067	Foxp1	chr6	-	A3SS	spermatogonia
28	ENSMUSG00000063889	Crem	chr18	-	A3SS	spermatogonia
29	ENSMUSG00000071176	Arhgef10	chr8	+	A3SS	spermatogonia
30	ENSMUSG00000034544	Rsrc1	chr3	+	A3SS	spermatogonia
31	ENSMUSG00000001415	Smg5	chr3	+	A3SS	spermatogonia
32	ENSMUSG00000035139	Secisbp2	chr13	+	A3SS	spermatogonia
33	ENSMUSG00000031403	Dkc1	chrX	+	A3SS	spermatogonia
34	ENSMUSG00000029472	Anapc5	chr5	-	A3SS	spermatogonia
35	ENSMUSG00000062127	Cttnbp2nl	chr3	-	A3SS	spermatogonia
36	ENSMUSG00000020366	Mapk9	chr11	+	A3SS	spermatogonia
37	ENSMUSG00000024908	Ppp6r3	chr19	-	A3SS	spermatogonia
38	ENSMUSG00000032637	Atxn2l	chr7	-	A3SS	spermatogonia
39	ENSMUSG00000049658	Bdp1	chr13	-	A3SS	spermatogonia
40	ENSMUSG00000030533	Unc45a	chr7	-	A3SS	spermatogonia
41	ENSMUSG00000045078	Rnf216	chr5	-	A3SS	spermatogonia
42	ENSMUSG00000058135	Gstm1	chr3	-	A3SS	spermatogonia
43	ENSMUSG00000037266	Rsrp1	chr4	+	A3SS	spermatogonia
44	ENSMUSG00000003421	Nosip	chr7	+	A3SS	spermatogonia
45	ENSMUSG00000039449	Prpf18	chr2	-	A3SS	spermatogonia
46	ENSMUSG00000037876	Jmjd1c	chr10	+	A3SS	spermatogonia
47	ENSMUSG00000037572	Wdhd1	chr14	-	A3SS	spermatogonia
48	ENSMUSG00000008682	Rpl10	chrX	+	A3SS	spermatogonia
49	ENSMUSG00000047284	Neurl4	chr11	+	A3SS	spermatogonia
50	ENSMUSG00000020952	Scfd1	chr12	+	A3SS	spermatogonia
51	ENSMUSG00000027014	Cwc22	chr2	-	A3SS	spermatogonia
52	ENSMUSG00000039382	Wdr45	chrX	+	A3SS	spermatogonia
53	ENSMUSG00000022770	Dlg1	chr16	+	A3SS	spermatogonia
54	ENSMUSG00000029068	Ccnl2	chr4	+	A3SS	spermatogonia
55	ENSMUSG00000062822	4833420G17Rik	chr13	+	A3SS	spermatogonia
56	ENSMUSG00000027569	Mrgbp	chr2	+	A3SS	spermatogonia
57	ENSMUSG00000032815	Fanca	chr8	-	A3SS	spermatogonia
58	ENSMUSG00000060985	Tdrd5	chr1	-	A3SS	spermatogonia
59	ENSMUSG00000037270	4932438A13Rik	chr3	+	A3SS	spermatogonia
60	ENSMUSG00000028582	Cc2d1b	chr4	+	A3SS	spermatogonia
61	ENSMUSG00000026082	Rev1	chr1	-	A3SS	spermatogonia
62	ENSMUSG00000022119	Rbm26	chr14	-	A3SS	spermatogonia
63	ENSMUSG00000038766	Gabpb2	chr3	-	A3SS	spermatogonia
64	ENSMUSG00000052533	Nup188	chr2	+	A3SS	spermatogonia
65	ENSMUSG00000074165	Zfp788	chr7	+	A3SS	spermatogonia
66	ENSMUSG00000029070	Mxra8	chr4	+	A3SS	spermatogonia
67	ENSMUSG00000037364	Srrt	chr5	-	A3SS	spermatogonia
68	ENSMUSG00000007837	Prrg2	chr7	-	A3SS	spermatogonia
69	ENSMUSG00000062743	Zfp677	chr17	+	A3SS	spermatogonia
70	ENSMUSG00000027550	Lrrcc1	chr3	+	A3SS	spermatogonia
71	ENSMUSG00000004677	Myo9b	chr8	+	A3SS	spermatogonia
72	ENSMUSG00000025558	Dock9	chr14	-	A3SS	spermatogonia
73	ENSMUSG00000092060	Bend4	chr5	-	A3SS	spermatogonia
74	ENSMUSG00000053477	Tcf4	chr18	+	A3SS	spermatogonia
75	ENSMUSG00000033628	Pik3c3	chr18	+	A3SS	spermatogonia
76	ENSMUSG00000024906	Mus81	chr19	-	A3SS	spermatogonia
77	ENSMUSG00000029238	Clock	chr5	-	A3SS	spermatogonia
78	ENSMUSG00000030231	Plekha5	chr6	+	A3SS	spermatogonia
79	ENSMUSG00000063808	Gpatch1	chr7	-	A3SS	spermatogonia
80	ENSMUSG00000039697	Ncoa7	chr10	-	A3SS	spermatogonia
81	ENSMUSG00000018669	Cdk5rap3	chr11	-	A3SS	spermatogonia
82	ENSMUSG00000020982	Nemf	chr12	-	A3SS	spermatogonia
83	ENSMUSG00000002297	Dbf4	chr5	-	A3SS	spermatogonia
84	ENSMUSG00000058254	Tspan7	chrX	+	A3SS	spermatogonia
85	ENSMUSG00000022995	Enah	chr1	-	A3SS	spermatogonia
86	ENSMUSG00000022552	Sharpin	chr15	-	A3SS	spermatogonia
87	ENSMUSG00000025793	Hgs	chr11	+	A3SS	spermatogonia
88	ENSMUSG00000019478	Rab4a	chr8	+	A3SS	spermatogonia
89	ENSMUSG00000030435	U2af2	chr7	+	A3SS	spermatogonia
90	ENSMUSG00000002395	Use1	chr8	+	A3SS	spermatogonia
91	ENSMUSG00000037426	Depdc5	chr5	+	A3SS	spermatogonia
92	ENSMUSG00000032803	Cdv3	chr9	-	A3SS	spermatogonia
93	ENSMUSG00000064302	Clasp1	chr1	+	A3SS	spermatogonia
94	ENSMUSG00000038618	Rassf7	chr7	+	A3SS	spermatogonia
95	ENSMUSG00000099481	Xndc1	chr7	+	A3SS	spermatogonia
96	ENSMUSG00000025159	Mms19	chr19	-	A3SS	spermatogonia
97	ENSMUSG00000033411	Ctdspl2	chr2	+	A3SS	spermatogonia
98	ENSMUSG00000021905	Dph3	chr14	-	A3SS	spermatogonia
99	ENSMUSG00000026991	Pkp4	chr2	+	A3SS	spermatogonia
100	ENSMUSG00000044037	Als2cl	chr9	+	A3SS	spermatogonia
101	ENSMUSG00000029141	Slc4a1ap	chr5	+	A3SS	spermatogonia
102	ENSMUSG00000036779	Papd5	chr8	+	A3SS	spermatogonia
103	ENSMUSG00000020167	Tcf3	chr10	-	A3SS	spermatogonia
104	ENSMUSG00000027684	Mecom	chr3	-	A3SS	spermatogonia
105	ENSMUSG00000002804	Nudt14	chr12	-	A3SS	spermatogonia
106	ENSMUSG00000040712	Camta2	chr11	-	A3SS	spermatogonia
107	ENSMUSG00000023262	Acy1	chr9	-	A3SS	spermatogonia
108	ENSMUSG00000000037	Scml2	chrX	+	A3SS	spermatogonia
109	ENSMUSG00000026090	2010300C02Rik	chr1	-	A3SS	spermatogonia
110	ENSMUSG00000078517	Emc1	chr4	+	A3SS	spermatogonia
111	ENSMUSG00000037313	Tacc3	chr5	+	A3SS	spermatogonia
112	ENSMUSG00000030846	Tial1	chr7	-	A3SS	spermatogonia
113	ENSMUSG00000026798	Coq4	chr2	+	A3SS	spermatogonia
114	ENSMUSG00000028273	Pdlim5	chr3	-	A3SS	spermatogonia
115	ENSMUSG00000045672	Col27a1	chr4	+	A3SS	spermatogonia
116	ENSMUSG00000001909	Trmt1	chr8	+	A3SS	spermatogonia
117	ENSMUSG00000034724	Cnot6l	chr5	-	A3SS	spermatogonia
118	ENSMUSG00000032178	Ilf3	chr9	+	A3SS	spermatogonia
119	ENSMUSG00000037904	Ankrd9	chr12	-	A3SS	spermatogonia
120	ENSMUSG00000030638	Sh3gl3	chr7	+	A3SS	spermatogonia
121	ENSMUSG00000026812	Tsc1	chr2	+	A3SS	spermatogonia
122	ENSMUSG00000054874	Pcnx3	chr19	-	A3SS	spermatogonia
123	ENSMUSG00000001517	Foxm1	chr6	+	A3SS	spermatogonia
124	ENSMUSG00000025616	Usp16	chr16	+	A3SS	spermatogonia
125	ENSMUSG00000036503	Rnf13	chr3	+	A3SS	spermatogonia
126	ENSMUSG00000031314	Taf1	chrX	+	A3SS	spermatogonia
127	ENSMUSG00000075528	Aarsd1	chr11	-	A3SS	spermatogonia
128	ENSMUSG00000026821	Ralgds	chr2	+	A3SS	spermatogonia
129	ENSMUSG00000034560	Washc4	chr10	+	A3SS	spermatogonia
130	ENSMUSG00000034928	Rnf44	chr13	-	A3SS	spermatogonia
131	ENSMUSG00000023764	Sfi1	chr11	-	A3SS	spermatogonia
132	ENSMUSG00000018661	Cog1	chr11	+	A3SS	spermatogonia
133	ENSMUSG00000035953	Tmem55b	chr14	-	A3SS	spermatogonia
134	ENSMUSG00000038524	Fchsd1	chr18	-	A3SS	spermatogonia
135	ENSMUSG00000030465	Psd3	chr8	-	A3SS	spermatogonia
136	ENSMUSG00000014873	Surf2	chr2	+	A3SS	spermatogonia
137	ENSMUSG00000032480	Dhx30	chr9	-	A3SS	spermatogonia
138	ENSMUSG00000051727	Kctd14	chr7	+	A3SS	spermatogonia
139	ENSMUSG00000041264	Uspl1	chr5	+	A3SS	spermatogonia
140	ENSMUSG00000027677	Ttc14	chr3	+	A3SS	spermatogonia
141	ENSMUSG00000063455	D630045J12Rik	chr6	-	A3SS	spermatogonia
142	ENSMUSG00000029209	Gnpda2	chr5	-	A3SS	spermatogonia
143	ENSMUSG00000030929	Eri2	chr7	-	A3SS	spermatogonia
144	ENSMUSG00000023994	Nfya	chr17	-	A3SS	spermatogonia
145	ENSMUSG00000006720	Zfp184	chr13	+	A3SS	spermatogonia
146	ENSMUSG00000028347	Tmeff1	chr4	+	A3SS	spermatogonia
147	ENSMUSG00000074358	Ccdc61	chr7	-	A3SS	spermatogonia
148	ENSMUSG00000033096	Apmap	chr2	-	A3SS	spermatogonia
149	ENSMUSG00000031816	Mthfsd	chr8	-	A3SS	spermatogonia
150	ENSMUSG00000032525	Nktr	chr9	+	A3SS	spermatogonia
151	ENSMUSG00000003617	Cp	chr3	+	A3SS	spermatogonia
152	ENSMUSG00000030598	Fbxo17	chr7	+	A3SS	spermatogonia
153	ENSMUSG00000024914	Drap1	chr19	-	A3SS	spermatogonia
154	ENSMUSG00000036860	Mrpl55	chr11	+	A3SS	spermatogonia
155	ENSMUSG00000036473	Tbc1d24	chr17	-	A3SS	spermatogonia
156	ENSMUSG00000035024	Ncapd3	chr9	+	A3SS	spermatogonia
157	ENSMUSG00000004415	Col26a1	chr5	-	A3SS	spermatogonia
158	ENSMUSG00000074863	Platr25	chr13	-	A3SS	spermatogonia
159	ENSMUSG00000027620	Rbm39	chr2	-	A3SS	spermatogonia
160	ENSMUSG00000037784	Dzip1l	chr9	+	A3SS	spermatogonia
161	ENSMUSG00000028060	2810403A07Rik	chr3	+	A3SS	spermatogonia
162	ENSMUSG00000038274	Fau	chr19	+	A3SS	spermatogonia
163	ENSMUSG00000031660	Brd7	chr8	-	A3SS	spermatogonia
164	ENSMUSG00000063077	Kif1b	chr4	-	A3SS	spermatogonia
165	ENSMUSG00000028898	Trnau1ap	chr4	-	A3SS	spermatogonia
166	ENSMUSG00000034175	Rhbdd3	chr11	+	A3SS	spermatogonia
167	ENSMUSG00000020472	Zkscan17	chr11	-	A3SS	spermatogonia
168	ENSMUSG00000053332	Gas5	chr1	+	A3SS	spermatogonia
169	ENSMUSG00000045503	Sys1	chr2	+	A3SS	spermatogonia
170	ENSMUSG00000035798	Zdhhc17	chr10	-	A3SS	spermatogonia
171	ENSMUSG00000039536	Stau1	chr2	-	A3SS	spermatogonia
172	ENSMUSG00000020329	Polrmt	chr10	-	A3SS	spermatogonia
173	ENSMUSG00000036202	Rif1	chr2	+	A3SS	spermatogonia
174	ENSMUSG00000035545	Leng8	chr7	+	A3SS	spermatogonia
175	ENSMUSG00000041341	Atg2b	chr12	-	A3SS	spermatogonia
176	ENSMUSG00000030965	Abraxas2	chr7	+	A3SS	spermatogonia
177	ENSMUSG00000029625	Cpsf4	chr5	+	A3SS	spermatogonia
178	ENSMUSG00000022827	Rabl3	chr16	+	A3SS	spermatogonia
179	ENSMUSG00000040855	Reps2	chrX	-	A3SS	spermatogonia
180	ENSMUSG00000028689	Ccdc163	chr4	+	A3SS	spermatogonia
181	ENSMUSG00000057649	Brd9	chr13	+	A3SS	spermatogonia
182	ENSMUSG00000073411	H2-D1	chr17	+	A3SS	spermatogonia
183	ENSMUSG00000029510	Gpc2	chr5	-	A3SS	spermatogonia
184	ENSMUSG00000029089	5730480H06Rik	chr5	+	A3SS	spermatogonia
185	ENSMUSG00000032280	Tle3	chr9	+	A3SS	spermatogonia
186	ENSMUSG00000040842	Szrd1	chr4	-	A3SS	spermatogonia
187	ENSMUSG00000041718	Alg13	chrX	+	A3SS	spermatogonia
188	ENSMUSG00000034786	Gpsm3	chr17	+	A3SS	spermatogonia
189	ENSMUSG00000034729	Mrps10	chr17	+	A3SS	spermatogonia
190	ENSMUSG00000074247	Dda1	chr8	+	A3SS	spermatogonia
191	ENSMUSG00000021171	Esyt2	chr12	+	A3SS	spermatogonia
192	ENSMUSG00000005982	Naa60	chr16	+	A3SS	spermatogonia
193	ENSMUSG00000033439	Trmt13	chr3	-	A3SS	spermatogonia
194	ENSMUSG00000024963	Dnajc4	chr19	-	A3SS	spermatogonia
195	ENSMUSG00000029592	Usp30	chr5	+	A3SS	spermatogonia
196	ENSMUSG00000061758	Akr1b10	chr6	+	A3SS	spermatogonia
197	ENSMUSG00000042613	Pbxip1	chr3	+	A3SS	spermatogonia
198	ENSMUSG00000052593	Adam17	chr12	-	A3SS	spermatogonia
199	ENSMUSG00000055835	Zfp1	chr8	+	A3SS	spermatogonia
200	ENSMUSG00000026275	Ppp1r7	chr1	+	A3SS	spermatogonia
201	ENSMUSG00000021532	Fastkd3	chr13	+	A3SS	spermatogonia
202	ENSMUSG00000058740	Kcnt1	chr2	+	A3SS	spermatogonia
203	ENSMUSG00000024805	Pcgf5	chr19	+	A3SS	spermatogonia
204	ENSMUSG00000067629	Syngap1	chr17	+	A3SS	spermatogonia
205	ENSMUSG00000022346	Myc	chr15	+	A3SS	spermatogonia
206	ENSMUSG00000029722	Agfg2	chr5	-	A3SS	spermatogonia
207	ENSMUSG00000020476	Dbnl	chr11	+	A3SS	spermatogonia
208	ENSMUSG00000020212	Mdm1	chr10	+	A3SS	spermatogonia
209	ENSMUSG00000026608	Kctd3	chr1	-	A3SS	spermatogonia
210	ENSMUSG00000046169	Adamts6	chr13	+	A3SS	spermatogonia
211	ENSMUSG00000060862	Zbtb40	chr4	-	A3SS	spermatogonia
212	ENSMUSG00000033596	Rfwd3	chr8	-	A3SS	spermatogonia
213	ENSMUSG00000043243	Fam129c	chr8	+	A3SS	spermatogonia
214	ENSMUSG00000040272	Accs	chr2	-	A3SS	spermatogonia
215	ENSMUSG00000028688	Toe1	chr4	-	A3SS	spermatogonia
216	ENSMUSG00000034563	Ccpg1	chr9	+	A3SS	spermatogonia
217	ENSMUSG00000026670	Uap1	chr1	-	A3SS	spermatogonia
218	ENSMUSG00000097248	Gm2694	chr8	+	A3SS	spermatogonia
219	ENSMUSG00000010453	Kansl3	chr1	-	A3SS	spermatogonia
220	ENSMUSG00000035735	Dagla	chr19	-	A3SS	spermatogonia
221	ENSMUSG00000026826	Nr4a2	chr2	-	A3SS	spermatogonia
222	ENSMUSG00000006215	Zbtb17	chr4	+	A3SS	spermatogonia
223	ENSMUSG00000042826	Fgf11	chr11	-	A3SS	spermatogonia
224	ENSMUSG00000059713	Rcan3	chr4	-	A3SS	spermatogonia
225	ENSMUSG00000020220	Vps13d	chr4	-	A3SS	spermatogonia
226	ENSMUSG00000037339	Fam53a	chr5	-	A3SS	spermatogonia
227	ENSMUSG00000059475	Zfp426	chr9	-	A3SS	spermatogonia
228	ENSMUSG00000035382	Pcsk7	chr9	+	A3SS	spermatogonia
229	ENSMUSG00000068206	Pick1	chr15	+	A3SS	spermatogonia
230	ENSMUSG00000041164	Zmiz2	chr11	+	A3SS	spermatogonia
231	ENSMUSG00000037134	Prmt9	chr8	+	A3SS	spermatogonia
232	ENSMUSG00000027699	Ect2	chr3	-	A3SS	spermatogonia
233	ENSMUSG00000038895	Zfp653	chr9	-	A3SS	spermatogonia
234	ENSMUSG00000042570	Mier2	chr10	-	A3SS	spermatogonia
235	ENSMUSG00000028639	Ybx1	chr4	-	A3SS	spermatogonia
236	ENSMUSG00000068457	Uty	chrY	-	A3SS	spermatogonia
237	ENSMUSG00000045482	Trrap	chr5	+	A3SS	spermatogonia
238	ENSMUSG00000068882	Ssb	chr2	+	A3SS	spermatogonia
239	ENSMUSG00000033793	Atp6v1h	chr1	+	A3SS	spermatogonia
240	ENSMUSG00000026761	Orc4	chr2	-	A3SS	spermatogonia
241	ENSMUSG00000022744	Cldnd1	chr16	+	A3SS	spermatogonia
242	ENSMUSG00000000131	Xpo6	chr7	-	A3SS	spermatogonia
243	ENSMUSG00000032562	Gnai2	chr9	-	A3SS	spermatogonia
244	ENSMUSG00000003309	Ap1m2	chr9	-	A3SS	spermatogonia
245	ENSMUSG00000039844	Rapgef1	chr2	+	A3SS	spermatogonia
246	ENSMUSG00000078765	U2af1l4	chr7	+	A3SS	spermatogonia
247	ENSMUSG00000003299	Mrpl4	chr9	+	A3SS	spermatogonia
248	ENSMUSG00000022472	Desi1	chr15	-	A3SS	spermatogonia
249	ENSMUSG00000024483	Ankhd1	chr18	+	A3SS	spermatogonia
250	ENSMUSG00000025409	Mbd6	chr10	-	A3SS	spermatogonia
251	ENSMUSG00000026383	Epb41l5	chr1	-	A3SS	spermatogonia
252	ENSMUSG00000022558	Mroh1	chr15	+	A3SS	spermatogonia
253	ENSMUSG00000039221	Rpl22l1	chr3	+	A3SS	spermatogonia
254	ENSMUSG00000032842	Abcc10	chr17	-	A3SS	spermatogonia
255	ENSMUSG00000026972	Arrdc1	chr2	-	A3SS	spermatogonia
256	ENSMUSG00000025507	Pidd1	chr7	-	A3SS	spermatogonia
257	ENSMUSG00000014668	Chfr	chr5	+	A3SS	spermatogonia
258	ENSMUSG00000036570	Fxyd1	chr7	-	A3SS	spermatogonia
259	ENSMUSG00000039531	Zufsp	chr10	-	A3SS	spermatogonia
260	ENSMUSG00000025575	Cant1	chr11	-	A3SS	spermatogonia
261	ENSMUSG00000023707	Ogfod2	chr5	+	A3SS	spermatogonia
262	ENSMUSG00000067825	Pex26	chr6	+	A3SS	spermatogonia
263	ENSMUSG00000023904	Hcfc1r1	chr17	+	A3SS	spermatogonia
264	ENSMUSG00000000823	Zfp512b	chr2	-	A3SS	spermatogonia
265	ENSMUSG00000034327	Kctd9	chr14	+	A3SS	spermatogonia
266	ENSMUSG00000003824	Syce2	chr8	+	A3SS	spermatogonia
267	ENSMUSG00000010057	Nprl2	chr9	+	A3SS	spermatogonia
268	ENSMUSG00000025372	Baiap2	chr11	+	A3SS	spermatogonia
269	ENSMUSG00000033916	Chmp2a	chr7	-	A3SS	spermatogonia
270	ENSMUSG00000091803	Cox16	chr12	-	A3SS	spermatogonia
271	ENSMUSG00000014791	Elmo3	chr8	+	A3SS	spermatogonia
272	ENSMUSG00000043909	Trp53bp1	chr2	-	A3SS	spermatogonia
273	ENSMUSG00000039068	Zzz3	chr3	+	A3SS	spermatogonia
274	ENSMUSG00000021572	Cep72	chr13	-	A3SS	spermatogonia
275	ENSMUSG00000061559	Wdr61	chr9	-	A3SS	spermatogonia
276	ENSMUSG00000026455	Klhl12	chr1	+	A3SS	spermatogonia
277	ENSMUSG00000051396	Gm45902	chr2	-	A3SS	spermatogonia
278	ENSMUSG00000032582	Rbm6	chr9	-	A3SS	spermatogonia
279	ENSMUSG00000031278	Acsl4	chrX	-	A3SS	spermatogonia
280	ENSMUSG00000041757	Plekha6	chr1	+	A3SS	spermatogonia
281	ENSMUSG00000029221	Slc30a9	chr5	+	A3SS	spermatogonia
282	ENSMUSG00000032966	Fkbp1a	chr2	+	A3SS	spermatogonia
283	ENSMUSG00000030583	Sipa1l3	chr7	-	A3SS	spermatogonia
284	ENSMUSG00000039307	Hexdc	chr11	+	A3SS	spermatogonia
285	ENSMUSG00000059939	9430015G10Rik	chr4	+	A3SS	spermatogonia
286	ENSMUSG00000023991	Foxp4	chr17	-	A3SS	spermatogonia
287	ENSMUSG00000021112	Mpp5	chr12	+	A3SS	spermatogonia
288	ENSMUSG00000030323	Ift122	chr6	+	A3SS	spermatogonia
289	ENSMUSG00000040225	Prrc2c	chr1	-	A3SS	spermatogonia
290	ENSMUSG00000028952	Zbtb48	chr4	-	A3SS	spermatogonia
291	ENSMUSG00000028107	Tars2	chr3	-	A3SS	spermatogonia
292	ENSMUSG00000038271	Iffo1	chr6	+	A3SS	spermatogonia
293	ENSMUSG00000038365	Fbxo25	chr8	+	A3SS	spermatogonia
294	ENSMUSG00000036817	Sun1	chr5	+	A3SS	spermatogonia
295	ENSMUSG00000035505	Cox18	chr5	-	A3SS	spermatogonia
296	ENSMUSG00000063450	Syne2	chr12	+	A3SS	spermatogonia
297	ENSMUSG00000017715	Pgs1	chr11	+	A3SS	spermatogonia
298	ENSMUSG00000023150	Ivns1abp	chr1	+	A3SS	spermatogonia
299	ENSMUSG00000035437	Rabgap1	chr2	+	A3SS	spermatogonia
300	ENSMUSG00000057363	Uxs1	chr1	-	A3SS	spermatogonia
301	ENSMUSG00000051169	Rpusd3	chr6	-	A3SS	spermatogonia
302	ENSMUSG00000021519	Mterf3	chr13	-	A3SS	spermatogonia
303	ENSMUSG00000037761	Actr5	chr2	+	A3SS	spermatogonia
304	ENSMUSG00000019590	Cyb561	chr11	-	A3SS	spermatogonia
305	ENSMUSG00000036502	Tmem255a	chrX	-	A3SS	spermatogonia
306	ENSMUSG00000037262	Kin	chr2	+	A3SS	spermatogonia
307	ENSMUSG00000071669	Snx29	chr16	+	A3SS	spermatogonia
308	ENSMUSG00000021134	Srsf5	chr12	+	A3SS	spermatogonia
309	ENSMUSG00000018501	Ncor1	chr11	-	A3SS	spermatogonia
310	ENSMUSG00000041483	Zfp281	chr1	+	A3SS	spermatogonia
311	ENSMUSG00000038780	Smurf1	chr5	-	A3SS	spermatogonia
312	ENSMUSG00000024220	Zfp523	chr17	+	A3SS	spermatogonia
313	ENSMUSG00000037447	Arid5a	chr1	+	A3SS	spermatogonia
314	ENSMUSG00000030177	Ccdc77	chr6	-	A3SS	spermatogonia
315	ENSMUSG00000041477	Dcp1b	chr6	+	A3SS	spermatogonia
316	ENSMUSG00000026766	Mmadhc	chr2	-	A3SS	spermatogonia
317	ENSMUSG00000042472	Zfp410	chr12	+	A3SS	spermatogonia
318	ENSMUSG00000009555	Cdk9	chr2	-	A3SS	spermatogonia
319	ENSMUSG00000028150	Rorc	chr3	+	A3SS	spermatogonia
320	ENSMUSG00000020262	Adarb1	chr10	-	A3SS	spermatogonia
321	ENSMUSG00000028944	Prkag2	chr5	-	A3SS	spermatogonia
322	ENSMUSG00000022475	Hdac7	chr15	-	A3SS	spermatogonia
323	ENSMUSG00000020776	Fbf1	chr11	-	A3SS	spermatogonia
324	ENSMUSG00000058318	Phf21a	chr2	+	A3SS	spermatogonia
325	ENSMUSG00000055723	Rras2	chr7	-	A3SS	spermatogonia
326	ENSMUSG00000054387	Mdm4	chr1	-	A3SS	spermatogonia
327	ENSMUSG00000060733	Ipmk	chr10	+	A3SS	spermatogonia
328	ENSMUSG00000042323	Pbrm1	chr14	+	A3SS	spermatogonia
329	ENSMUSG00000001082	Mfsd10	chr5	-	A3SS	spermatogonia
330	ENSMUSG00000002617	Zfp40	chr17	-	A3SS	spermatogonia
331	ENSMUSG00000066456	Hmgn3	chr9	-	A3SS	spermatogonia
332	ENSMUSG00000000916	Nsun5	chr5	+	A3SS	spermatogonia
333	ENSMUSG00000026342	Slc35f5	chr1	+	A3SS	spermatogonia
334	ENSMUSG00000004931	Apba3	chr10	+	A3SS	spermatogonia
335	ENSMUSG00000016181	Diexf	chr1	-	A3SS	spermatogonia
336	ENSMUSG00000032332	Col12a1	chr9	-	A3SS	spermatogonia
337	ENSMUSG00000006676	Usp19	chr9	+	A3SS	spermatogonia
338	ENSMUSG00000042699	Dhx9	chr1	-	A3SS	spermatogonia
339	ENSMUSG00000026219	Trip12	chr1	-	A3SS	spermatogonia
340	ENSMUSG00000031626	Sorbs2	chr8	+	A3SS	spermatogonia
341	ENSMUSG00000023051	Tarbp2	chr15	+	A3SS	spermatogonia
342	ENSMUSG00000037190	Cyb561d2	chr9	-	A3SS	spermatogonia
343	ENSMUSG00000057421	Las1l	chrX	-	A3SS	spermatogonia
344	ENSMUSG00000039048	Foxred1	chr9	-	A3SS	spermatogonia
345	ENSMUSG00000024044	Epb41l3	chr17	+	A3SS	spermatogonia
346	ENSMUSG00000033852	Gm28042	chr2	+	A3SS	spermatogonia
347	ENSMUSG00000062647	Rpl7a	chr2	+	A3SS	spermatogonia
348	ENSMUSG00000063511	Snrnp70	chr7	-	A3SS	spermatogonia
349	ENSMUSG00000038611	Phrf1	chr7	+	A3SS	spermatogonia
350	ENSMUSG00000035469	Rcbtb1	chr14	+	A3SS	spermatogonia
351	ENSMUSG00000025665	Rps6ka6	chrX	-	A3SS	spermatogonia
352	ENSMUSG00000030316	Tamm41	chr6	-	A3SS	spermatogonia
353	ENSMUSG00000039753	Fbxl5	chr5	-	A3SS	spermatogonia
354	ENSMUSG00000021555	Naa35	chr13	+	A3SS	spermatogonia
355	ENSMUSG00000072825	Cep170b	chr12	+	A3SS	spermatogonia
356	ENSMUSG00000038095	Sbno1	chr5	-	A3SS	spermatogonia
357	ENSMUSG00000015790	Surf1	chr2	-	A3SS	spermatogonia
358	ENSMUSG00000036550	Cnot1	chr8	-	A3SS	spermatogonia
359	ENSMUSG00000020873	Slc35b1	chr11	+	A3SS	spermatogonia
360	ENSMUSG00000029169	Dhx15	chr5	-	A3SS	spermatogonia
361	ENSMUSG00000052423	B4galt3	chr1	+	A3SS	spermatogonia
362	ENSMUSG00000069601	Ank3	chr10	+	A3SS	spermatogonia
363	ENSMUSG00000078350	Smim1	chr4	-	A3SS	spermatogonia
364	ENSMUSG00000021275	Tecpr2	chr12	+	A3SS	spermatogonia
365	ENSMUSG00000040940	Arhgef1	chr7	+	A3SS	spermatogonia
366	ENSMUSG00000022973	Synj1	chr16	-	A3SS	spermatogonia
367	ENSMUSG00000028655	Mfsd2a	chr4	-	A3SS	spermatogonia
368	ENSMUSG00000041939	Mvk	chr5	+	A3SS	spermatogonia
369	ENSMUSG00000041225	Arhgap12	chr18	-	A3SS	spermatogonia
370	ENSMUSG00000038174	Fam126b	chr1	-	A5SS	spermatogonia
371	ENSMUSG00000025007	Aldh18a1	chr19	-	A5SS	spermatogonia
372	ENSMUSG00000052812	Atad2b	chr12	+	A5SS	spermatogonia
373	ENSMUSG00000022884	Eif4a2	chr16	+	A5SS	spermatogonia
374	ENSMUSG00000041890	Git2	chr5	-	A5SS	spermatogonia
375	ENSMUSG00000054770	Kctd18	chr1	-	A5SS	spermatogonia
376	ENSMUSG00000032580	Rbm5	chr9	-	A5SS	spermatogonia
377	ENSMUSG00000001604	Tcea3	chr4	+	A5SS	spermatogonia
378	ENSMUSG00000036529	Sbf1	chr15	-	A5SS	spermatogonia
379	ENSMUSG00000014856	Tmem208	chr8	+	A5SS	spermatogonia
380	ENSMUSG00000040599	Mis12	chr11	+	A5SS	spermatogonia
381	ENSMUSG00000036120	Rfxank	chr8	-	A5SS	spermatogonia
382	ENSMUSG00000055491	Pprc1	chr19	+	A5SS	spermatogonia
383	ENSMUSG00000041459	Tardbp	chr4	-	A5SS	spermatogonia
384	ENSMUSG00000040410	Fbxl4	chr4	+	A5SS	spermatogonia
385	ENSMUSG00000045795	Whamm	chr7	+	A5SS	spermatogonia
386	ENSMUSG00000025188	Hps1	chr19	-	A5SS	spermatogonia
387	ENSMUSG00000031429	Psmd10	chrX	-	A5SS	spermatogonia
388	ENSMUSG00000090626	Tex9	chr9	-	A5SS	spermatogonia
389	ENSMUSG00000051154	Commd3	chr2	+	A5SS	spermatogonia
390	ENSMUSG00000024921	Smarca2	chr19	+	A5SS	spermatogonia
391	ENSMUSG00000044465	Fam160a2	chr7	-	A5SS	spermatogonia
392	ENSMUSG00000038429	Usp5	chr6	-	A5SS	spermatogonia
393	ENSMUSG00000018923	Med11	chr11	+	A5SS	spermatogonia
394	ENSMUSG00000071653	1810009A15Rik	chr19	+	A5SS	spermatogonia
395	ENSMUSG00000021288	Klc1	chr12	+	A5SS	spermatogonia
396	ENSMUSG00000049658	Bdp1	chr13	-	A5SS	spermatogonia
397	ENSMUSG00000021782	Dlg5	chr14	-	A5SS	spermatogonia
398	ENSMUSG00000087174	5530601H04Rik	chrX	-	A5SS	spermatogonia
399	ENSMUSG00000022772	Senp5	chr16	-	A5SS	spermatogonia
400	ENSMUSG00000030061	Uba3	chr6	-	A5SS	spermatogonia
401	ENSMUSG00000063810	Alms1	chr6	+	A5SS	spermatogonia
402	ENSMUSG00000055296	Tmem245	chr4	-	A5SS	spermatogonia
403	ENSMUSG00000031939	Taf1d	chr9	+	A5SS	spermatogonia
404	ENSMUSG00000041346	Wrap53	chr11	-	A5SS	spermatogonia
405	ENSMUSG00000022770	Dlg1	chr16	+	A5SS	spermatogonia
406	ENSMUSG00000062822	4833420G17Rik	chr13	+	A5SS	spermatogonia
407	ENSMUSG00000030788	Rnf141	chr7	-	A5SS	spermatogonia
408	ENSMUSG00000032712	2810474O19Rik	chr6	+	A5SS	spermatogonia
409	ENSMUSG00000004040	Stat3	chr11	-	A5SS	spermatogonia
410	ENSMUSG00000040918	Slc19a2	chr1	+	A5SS	spermatogonia
411	ENSMUSG00000002781	Tmem143	chr7	+	A5SS	spermatogonia
412	ENSMUSG00000032815	Fanca	chr8	-	A5SS	spermatogonia
413	ENSMUSG00000037270	4932438A13Rik	chr3	+	A5SS	spermatogonia
414	ENSMUSG00000003778	Brd8	chr18	-	A5SS	spermatogonia
415	ENSMUSG00000005682	Pan2	chr10	+	A5SS	spermatogonia
416	ENSMUSG00000037364	Srrt	chr5	-	A5SS	spermatogonia
417	ENSMUSG00000027550	Lrrcc1	chr3	+	A5SS	spermatogonia
418	ENSMUSG00000026792	Lrsam1	chr2	-	A5SS	spermatogonia
419	ENSMUSG00000035215	Lsm7	chr10	-	A5SS	spermatogonia
420	ENSMUSG00000010608	Rbm25	chr12	+	A5SS	spermatogonia
421	ENSMUSG00000012848	Rps5	chr7	+	A5SS	spermatogonia
422	ENSMUSG00000001062	Vps9d1	chr8	-	A5SS	spermatogonia
423	ENSMUSG00000031441	Atp11a	chr8	+	A5SS	spermatogonia
424	ENSMUSG00000026280	Atg4b	chr1	+	A5SS	spermatogonia
425	ENSMUSG00000036893	Ehmt1	chr2	-	A5SS	spermatogonia
426	ENSMUSG00000061028	Clasrp	chr7	-	A5SS	spermatogonia
427	ENSMUSG00000098950	Gm28036	chr2	-	A5SS	spermatogonia
428	ENSMUSG00000003452	Bicd1	chr6	+	A5SS	spermatogonia
429	ENSMUSG00000057594	Arl16	chr11	-	A5SS	spermatogonia
430	ENSMUSG00000026577	Blzf1	chr1	-	A5SS	spermatogonia
431	ENSMUSG00000028759	Hp1bp3	chr4	+	A5SS	spermatogonia
432	ENSMUSG00000041375	Ccdc9	chr7	-	A5SS	spermatogonia
433	ENSMUSG00000021819	Zswim8	chr14	+	A5SS	spermatogonia
434	ENSMUSG00000005883	Spo11	chr2	+	A5SS	spermatogonia
435	ENSMUSG00000039652	Cpeb3	chr19	-	A5SS	spermatogonia
436	ENSMUSG00000025420	Katnal2	chr18	-	A5SS	spermatogonia
437	ENSMUSG00000053453	Thoc7	chr14	-	A5SS	spermatogonia
438	ENSMUSG00000015090	Ptgds	chr2	-	A5SS	spermatogonia
439	ENSMUSG00000037805	Rpl10a	chr17	+	A5SS	spermatogonia
440	ENSMUSG00000032041	Tirap	chr9	-	A5SS	spermatogonia
441	ENSMUSG00000040785	Ttc3	chr16	+	A5SS	spermatogonia
442	ENSMUSG00000000631	Myo18a	chr11	+	A5SS	spermatogonia
443	ENSMUSG00000024795	Kif20b	chr19	+	A5SS	spermatogonia
444	ENSMUSG00000035168	Tanc1	chr2	+	A5SS	spermatogonia
445	ENSMUSG00000029478	Ncor2	chr5	-	A5SS	spermatogonia
446	ENSMUSG00000036180	Gatad2a	chr8	-	A5SS	spermatogonia
447	ENSMUSG00000030180	Kdm5a	chr6	+	A5SS	spermatogonia
448	ENSMUSG00000067367	Lyar	chr5	+	A5SS	spermatogonia
449	ENSMUSG00000001909	Trmt1	chr8	+	A5SS	spermatogonia
450	ENSMUSG00000004626	Stxbp2	chr8	+	A5SS	spermatogonia
451	ENSMUSG00000026005	Rpe	chr1	+	A5SS	spermatogonia
452	ENSMUSG00000038346	Zfp384	chr6	+	A5SS	spermatogonia
453	ENSMUSG00000030611	Mrps11	chr7	+	A5SS	spermatogonia
454	ENSMUSG00000054889	Dsp	chr13	+	A5SS	spermatogonia
455	ENSMUSG00000026811	St6galnac6	chr2	+	A5SS	spermatogonia
456	ENSMUSG00000054874	Pcnx3	chr19	-	A5SS	spermatogonia
457	ENSMUSG00000070371	Prss36	chr7	-	A5SS	spermatogonia
458	ENSMUSG00000024369	Nelfe	chr17	+	A5SS	spermatogonia
459	ENSMUSG00000026860	Sh3glb2	chr2	-	A5SS	spermatogonia
460	ENSMUSG00000030935	Acsm3	chr7	+	A5SS	spermatogonia
461	ENSMUSG00000025958	Creb1	chr1	+	A5SS	spermatogonia
462	ENSMUSG00000023764	Sfi1	chr11	-	A5SS	spermatogonia
463	ENSMUSG00000026113	Inpp4a	chr1	+	A5SS	spermatogonia
464	ENSMUSG00000019710	Mrpl24	chr3	+	A5SS	spermatogonia
465	ENSMUSG00000036223	Ska1	chr18	-	A5SS	spermatogonia
466	ENSMUSG00000032480	Dhx30	chr9	-	A5SS	spermatogonia
467	ENSMUSG00000024911	Fibp	chr19	+	A5SS	spermatogonia
468	ENSMUSG00000028621	Cyb5rl	chr4	+	A5SS	spermatogonia
469	ENSMUSG00000042772	Smg7	chr1	-	A5SS	spermatogonia
470	ENSMUSG00000024430	Cabyr	chr18	+	A5SS	spermatogonia
471	ENSMUSG00000027284	Cdan1	chr2	-	A5SS	spermatogonia
472	ENSMUSG00000025980	Hspd1	chr1	-	A5SS	spermatogonia
473	ENSMUSG00000027951	Adar	chr3	+	A5SS	spermatogonia
474	ENSMUSG00000038900	Rpl12	chr2	+	A5SS	spermatogonia
475	ENSMUSG00000013858	Tmem259	chr10	-	A5SS	spermatogonia
476	ENSMUSG00000074358	Ccdc61	chr7	-	A5SS	spermatogonia
477	ENSMUSG00000024163	Mapk8ip3	chr17	-	A5SS	spermatogonia
478	ENSMUSG00000060073	Psma3	chr12	+	A5SS	spermatogonia
479	ENSMUSG00000022394	L3mbtl2	chr15	+	A5SS	spermatogonia
480	ENSMUSG00000033799	Fam208b	chr13	-	A5SS	spermatogonia
481	ENSMUSG00000057836	Xlr3a	chrX	-	A5SS	spermatogonia
482	ENSMUSG00000025006	Sorbs1	chr19	-	A5SS	spermatogonia
483	ENSMUSG00000024050	Wiz	chr17	-	A5SS	spermatogonia
484	ENSMUSG00000040728	Esrp1	chr4	-	A5SS	spermatogonia
485	ENSMUSG00000096215	Smim22	chr16	+	A5SS	spermatogonia
486	ENSMUSG00000028797	Tmem234	chr4	+	A5SS	spermatogonia
487	ENSMUSG00000025236	Adpgk	chr9	+	A5SS	spermatogonia
488	ENSMUSG00000034275	Igsf9b	chr9	+	A5SS	spermatogonia
489	ENSMUSG00000048100	Taf13	chr3	+	A5SS	spermatogonia
490	ENSMUSG00000023861	Mpc1	chr17	+	A5SS	spermatogonia
491	ENSMUSG00000030409	Dmpk	chr7	+	A5SS	spermatogonia
492	ENSMUSG00000028295	Smim8	chr4	-	A5SS	spermatogonia
493	ENSMUSG00000020472	Zkscan17	chr11	-	A5SS	spermatogonia
494	ENSMUSG00000053332	Gas5	chr1	+	A5SS	spermatogonia
495	ENSMUSG00000029559	2210016L21Rik	chr5	+	A5SS	spermatogonia
496	ENSMUSG00000029020	Mfn2	chr4	-	A5SS	spermatogonia
497	ENSMUSG00000014633	Cmc2	chr8	-	A5SS	spermatogonia
498	ENSMUSG00000020290	Xpo1	chr11	+	A5SS	spermatogonia
499	ENSMUSG00000096768	Erdr1	chrY	+	A5SS	spermatogonia
500	ENSMUSG00000021820	Camk2g	chr14	-	A5SS	spermatogonia
501	ENSMUSG00000073468	Sft2d1	chr17	+	A5SS	spermatogonia
502	ENSMUSG00000014418	Hps5	chr7	-	A5SS	spermatogonia
503	ENSMUSG00000022791	Tnk2	chr16	+	A5SS	spermatogonia
504	ENSMUSG00000030213	Atf7ip	chr6	+	A5SS	spermatogonia
505	ENSMUSG00000032280	Tle3	chr9	+	A5SS	spermatogonia
506	ENSMUSG00000015942	Gtf2ird2	chr5	+	A5SS	spermatogonia
507	ENSMUSG00000026730	Pter	chr2	+	A5SS	spermatogonia
508	ENSMUSG00000040782	Rfwd2	chr1	+	A5SS	spermatogonia
509	ENSMUSG00000041654	Slc39a11	chr11	-	A5SS	spermatogonia
510	ENSMUSG00000053565	Eif3k	chr7	-	A5SS	spermatogonia
511	ENSMUSG00000023286	Ube2j2	chr4	+	A5SS	spermatogonia
512	ENSMUSG00000026127	Imp4	chr1	+	A5SS	spermatogonia
513	ENSMUSG00000010277	2610507B11Rik	chr11	+	A5SS	spermatogonia
514	ENSMUSG00000073125	Xlr3b	chrX	+	A5SS	spermatogonia
515	ENSMUSG00000025899	Alkbh8	chr9	+	A5SS	spermatogonia
516	ENSMUSG00000056962	Jmjd6	chr11	-	A5SS	spermatogonia
517	ENSMUSG00000037326	Capn15	chr17	-	A5SS	spermatogonia
518	ENSMUSG00000028601	Echdc2	chr4	+	A5SS	spermatogonia
519	ENSMUSG00000032264	Zw10	chr9	+	A5SS	spermatogonia
520	ENSMUSG00000025997	Ikzf2	chr1	-	A5SS	spermatogonia
521	ENSMUSG00000025762	Larp1b	chr3	+	A5SS	spermatogonia
522	ENSMUSG00000047766	Lrrc49	chr9	-	A5SS	spermatogonia
523	ENSMUSG00000003808	Farsa	chr8	+	A5SS	spermatogonia
524	ENSMUSG00000041147	Brca2	chr5	+	A5SS	spermatogonia
525	ENSMUSG00000059439	Bcas3	chr11	+	A5SS	spermatogonia
526	ENSMUSG00000039458	Mtmr12	chr15	+	A5SS	spermatogonia
527	ENSMUSG00000028096	Gpr89	chr3	-	A5SS	spermatogonia
528	ENSMUSG00000036923	Stox1	chr10	-	A5SS	spermatogonia
529	ENSMUSG00000022425	Enpp2	chr15	-	A5SS	spermatogonia
530	ENSMUSG00000022641	Bbx	chr16	-	A5SS	spermatogonia
531	ENSMUSG00000040687	Madd	chr2	-	A5SS	spermatogonia
532	ENSMUSG00000023007	Prpf40b	chr15	+	A5SS	spermatogonia
533	ENSMUSG00000040928	S100pbp	chr4	-	A5SS	spermatogonia
534	ENSMUSG00000042520	Ubap2l	chr3	-	A5SS	spermatogonia
535	ENSMUSG00000030852	Tacc2	chr7	+	A5SS	spermatogonia
536	ENSMUSG00000030815	Phkg2	chr7	+	A5SS	spermatogonia
537	ENSMUSG00000007850	Hnrnph1	chr11	+	A5SS	spermatogonia
538	ENSMUSG00000060950	Trmt61a	chr12	+	A5SS	spermatogonia
539	ENSMUSG00000036459	Wtip	chr7	-	A5SS	spermatogonia
540	ENSMUSG00000033543	Gtf2a2	chr9	+	A5SS	spermatogonia
541	ENSMUSG00000030733	Sh2b1	chr7	-	A5SS	spermatogonia
542	ENSMUSG00000034401	Spata6	chr4	+	A5SS	spermatogonia
543	ENSMUSG00000000131	Xpo6	chr7	-	A5SS	spermatogonia
544	ENSMUSG00000038013	Wipf2	chr11	+	A5SS	spermatogonia
545	ENSMUSG00000029106	Add1	chr5	+	A5SS	spermatogonia
546	ENSMUSG00000024293	Esco1	chr18	-	A5SS	spermatogonia
547	ENSMUSG00000041594	Tmtc4	chr14	-	A5SS	spermatogonia
548	ENSMUSG00000039087	Rreb1	chr13	+	A5SS	spermatogonia
549	ENSMUSG00000030263	Lrmp	chr6	+	A5SS	spermatogonia
550	ENSMUSG00000014767	Tbp	chr17	+	A5SS	spermatogonia
551	ENSMUSG00000031728	Zfp821	chr8	+	A5SS	spermatogonia
552	ENSMUSG00000029687	Ezh2	chr6	-	A5SS	spermatogonia
553	ENSMUSG00000024431	Nr3c1	chr18	-	A5SS	spermatogonia
554	ENSMUSG00000004661	Arid3b	chr9	-	A5SS	spermatogonia
555	ENSMUSG00000041763	Tpp2	chr1	+	A5SS	spermatogonia
556	ENSMUSG00000022335	Zfat	chr15	-	A5SS	spermatogonia
557	ENSMUSG00000002797	Ggct	chr6	-	A5SS	spermatogonia
558	ENSMUSG00000061207	Stk19	chr17	-	A5SS	spermatogonia
559	ENSMUSG00000042489	Clspn	chr4	+	A5SS	spermatogonia
560	ENSMUSG00000078974	Sec61g	chr11	-	A5SS	spermatogonia
561	ENSMUSG00000020069	Hnrnph3	chr10	-	A5SS	spermatogonia
562	ENSMUSG00000027854	Sike1	chr3	+	A5SS	spermatogonia
563	ENSMUSG00000006289	Osgep	chr14	-	A5SS	spermatogonia
564	ENSMUSG00000052752	Traf7	chr17	-	A5SS	spermatogonia
565	ENSMUSG00000037470	Uggt1	chr1	-	A5SS	spermatogonia
566	ENSMUSG00000025147	Mob2	chr7	-	A5SS	spermatogonia
567	ENSMUSG00000002968	Med25	chr7	-	A5SS	spermatogonia
568	ENSMUSG00000046230	Vps13a	chr19	-	A5SS	spermatogonia
569	ENSMUSG00000036845	Lin37	chr7	-	A5SS	spermatogonia
570	ENSMUSG00000001034	Mapk7	chr11	-	A5SS	spermatogonia
571	ENSMUSG00000019087	Atp6ap1	chrX	+	A5SS	spermatogonia
572	ENSMUSG00000022843	Clcn2	chr16	-	A5SS	spermatogonia
573	ENSMUSG00000022377	Asap1	chr15	-	A5SS	spermatogonia
574	ENSMUSG00000021266	Wars	chr12	-	A5SS	spermatogonia
575	ENSMUSG00000027472	Pdrg1	chr2	-	A5SS	spermatogonia
576	ENSMUSG00000038552	Fndc4	chr5	-	A5SS	spermatogonia
577	ENSMUSG00000034211	Mrps17	chr5	+	A5SS	spermatogonia
578	ENSMUSG00000012609	Ttll5	chr12	+	A5SS	spermatogonia
579	ENSMUSG00000034248	Slc25a37	chr14	-	A5SS	spermatogonia
580	ENSMUSG00000043510	Hscb	chr5	-	A5SS	spermatogonia
581	ENSMUSG00000052609	Plekhg3	chr12	+	A5SS	spermatogonia
582	ENSMUSG00000066456	Hmgn3	chr9	-	A5SS	spermatogonia
583	ENSMUSG00000031565	Fgfr1	chr8	+	A5SS	spermatogonia
584	ENSMUSG00000000916	Nsun5	chr5	+	A5SS	spermatogonia
585	ENSMUSG00000001289	Pfdn5	chr15	+	A5SS	spermatogonia
586	ENSMUSG00000024118	1600002H07Rik	chr17	-	A5SS	spermatogonia
587	ENSMUSG00000049482	Ctu2	chr8	+	A5SS	spermatogonia
588	ENSMUSG00000038722	Bud31	chr5	+	A5SS	spermatogonia
589	ENSMUSG00000003161	Sri	chr5	+	A5SS	spermatogonia
590	ENSMUSG00000022864	D16Ertd472e	chr16	-	A5SS	spermatogonia
591	ENSMUSG00000037846	Rtkn2	chr10	+	A5SS	spermatogonia
592	ENSMUSG00000025873	Faf2	chr13	+	A5SS	spermatogonia
593	ENSMUSG00000030759	Far1	chr7	+	A5SS	spermatogonia
594	ENSMUSG00000031626	Sorbs2	chr8	+	A5SS	spermatogonia
595	ENSMUSG00000028681	Ptch2	chr4	+	A5SS	spermatogonia
596	ENSMUSG00000074797	Itpa	chr2	+	A5SS	spermatogonia
597	ENSMUSG00000036054	Sugp2	chr8	+	A5SS	spermatogonia
598	ENSMUSG00000070003	Ssbp4	chr8	-	A5SS	spermatogonia
599	ENSMUSG00000027660	Skil	chr3	+	A5SS	spermatogonia
600	ENSMUSG00000027425	Kat14	chr2	+	A5SS	spermatogonia
601	ENSMUSG00000036550	Cnot1	chr8	-	A5SS	spermatogonia
602	ENSMUSG00000043411	Usp48	chr4	+	A5SS	spermatogonia
603	ENSMUSG00000029098	Acox3	chr5	+	A5SS	spermatogonia
604	ENSMUSG00000069601	Ank3	chr10	+	A5SS	spermatogonia
605	ENSMUSG00000078350	Smim1	chr4	-	A5SS	spermatogonia
606	ENSMUSG00000020196	Cabin1	chr10	-	MXE	spermatogonia
607	ENSMUSG00000022884	Eif4a2	chr16	+	MXE	spermatogonia
608	ENSMUSG00000041890	Git2	chr5	-	MXE	spermatogonia
609	ENSMUSG00000002885	Adgre5	chr8	-	MXE	spermatogonia
610	ENSMUSG00000030562	Nox4	chr7	+	MXE	spermatogonia
611	ENSMUSG00000059486	Kbtbd2	chr6	-	MXE	spermatogonia
612	ENSMUSG00000026648	Dclre1c	chr2	+	MXE	spermatogonia
613	ENSMUSG00000046364	Rpl27a	chr7	+	MXE	spermatogonia
614	ENSMUSG00000032366	Tpm1	chr9	-	MXE	spermatogonia
615	ENSMUSG00000061477	Rps7	chr12	-	MXE	spermatogonia
616	ENSMUSG00000069049	Eif2s3y	chrY	+	MXE	spermatogonia
617	ENSMUSG00000022515	Anks3	chr16	-	MXE	spermatogonia
618	ENSMUSG00000052707	Tnrc6a	chr7	+	MXE	spermatogonia
619	ENSMUSG00000021816	Ppp3cb	chr14	-	MXE	spermatogonia
620	ENSMUSG00000021495	Fam193b	chr13	-	MXE	spermatogonia
621	ENSMUSG00000035310	Lin54	chr5	-	MXE	spermatogonia
622	ENSMUSG00000030374	Strn4	chr7	+	MXE	spermatogonia
623	ENSMUSG00000026553	Copa	chr1	+	MXE	spermatogonia
624	ENSMUSG00000057113	Npm1	chr11	-	MXE	spermatogonia
625	ENSMUSG00000035441	Myo1d	chr11	-	MXE	spermatogonia
626	ENSMUSG00000069855	Slc47a2	chr11	-	MXE	spermatogonia
627	ENSMUSG00000029767	Calu	chr6	+	MXE	spermatogonia
628	ENSMUSG00000028692	Akr1a1	chr4	-	MXE	spermatogonia
629	ENSMUSG00000019916	P4ha1	chr10	+	MXE	spermatogonia
630	ENSMUSG00000029781	Fkbp9	chr6	+	MXE	spermatogonia
631	ENSMUSG00000031422	Morf4l2	chrX	-	MXE	spermatogonia
632	ENSMUSG00000028476	Reck	chr4	+	MXE	spermatogonia
633	ENSMUSG00000030067	Foxp1	chr6	-	MXE	spermatogonia
634	ENSMUSG00000020716	Nf1	chr11	+	MXE	spermatogonia
635	ENSMUSG00000078515	Ddi2	chr4	-	MXE	spermatogonia
636	ENSMUSG00000001415	Smg5	chr3	+	MXE	spermatogonia
637	ENSMUSG00000030007	Cct7	chr6	+	MXE	spermatogonia
638	ENSMUSG00000000296	Tpd52l1	chr10	-	MXE	spermatogonia
639	ENSMUSG00000024908	Ppp6r3	chr19	-	MXE	spermatogonia
640	ENSMUSG00000000365	Rnf17	chr14	+	MXE	spermatogonia
641	ENSMUSG00000001435	Col18a1	chr10	-	MXE	spermatogonia
642	ENSMUSG00000032849	Abcc4	chr14	-	MXE	spermatogonia
643	ENSMUSG00000028826	Tmem57	chr4	-	MXE	spermatogonia
644	ENSMUSG00000058135	Gstm1	chr3	-	MXE	spermatogonia
645	ENSMUSG00000024330	Col11a2	chr17	+	MXE	spermatogonia
646	ENSMUSG00000025487	Psmd13	chr7	+	MXE	spermatogonia
647	ENSMUSG00000051427	Ccdc157	chr11	-	MXE	spermatogonia
648	ENSMUSG00000035126	Wdr78	chr4	-	MXE	spermatogonia
649	ENSMUSG00000015937	H2afy	chr13	-	MXE	spermatogonia
650	ENSMUSG00000024132	Eci1	chr17	+	MXE	spermatogonia
651	ENSMUSG00000062078	Qk	chr17	-	MXE	spermatogonia
652	ENSMUSG00000053279	Aldh1a1	chr19	+	MXE	spermatogonia
653	ENSMUSG00000030061	Uba3	chr6	-	MXE	spermatogonia
654	ENSMUSG00000107539	Gm44790	chr6	+	MXE	spermatogonia
655	ENSMUSG00000040904	Gm21988	chr11	-	MXE	spermatogonia
656	ENSMUSG00000063810	Alms1	chr6	+	MXE	spermatogonia
657	ENSMUSG00000012123	Crybg2	chr4	+	MXE	spermatogonia
658	ENSMUSG00000037572	Wdhd1	chr14	-	MXE	spermatogonia
659	ENSMUSG00000037960	Card19	chr13	-	MXE	spermatogonia
660	ENSMUSG00000005656	Snx6	chr12	-	MXE	spermatogonia
661	ENSMUSG00000028234	Rps20	chr4	-	MXE	spermatogonia
662	ENSMUSG00000022391	Rangap1	chr15	-	MXE	spermatogonia
663	ENSMUSG00000059119	Nap1l4	chr7	-	MXE	spermatogonia
664	ENSMUSG00000021392	Nol8	chr13	+	MXE	spermatogonia
665	ENSMUSG00000044033	Ccdc141	chr2	-	MXE	spermatogonia
666	ENSMUSG00000030424	Zfp939	chr7	+	MXE	spermatogonia
667	ENSMUSG00000060216	Arrb2	chr11	+	MXE	spermatogonia
668	ENSMUSG00000041815	Poldip3	chr15	-	MXE	spermatogonia
669	ENSMUSG00000021758	Ddx4	chr13	-	MXE	spermatogonia
670	ENSMUSG00000022770	Dlg1	chr16	+	MXE	spermatogonia
671	ENSMUSG00000031255	Sytl4	chrX	-	MXE	spermatogonia
672	ENSMUSG00000091896	Ube2d2a	chr18	+	MXE	spermatogonia
673	ENSMUSG00000005362	Crbn	chr6	-	MXE	spermatogonia
674	ENSMUSG00000020978	Klhdc2	chr12	+	MXE	spermatogonia
675	ENSMUSG00000015968	Cacna1d	chr14	-	MXE	spermatogonia
676	ENSMUSG00000040549	Ckap5	chr2	+	MXE	spermatogonia
677	ENSMUSG00000003731	Kpna6	chr4	-	MXE	spermatogonia
678	ENSMUSG00000022629	Kif21a	chr15	-	MXE	spermatogonia
679	ENSMUSG00000017264	Exosc10	chr4	+	MXE	spermatogonia
680	ENSMUSG00000073077	Gm7173	chrX	-	MXE	spermatogonia
681	ENSMUSG00000024425	Ndfip1	chr18	+	MXE	spermatogonia
682	ENSMUSG00000049606	Zfp644	chr5	-	MXE	spermatogonia
683	ENSMUSG00000001472	Tcf25	chr8	+	MXE	spermatogonia
684	ENSMUSG00000059586	Nsmce2	chr15	+	MXE	spermatogonia
685	ENSMUSG00000090841	Myl6	chr10	-	MXE	spermatogonia
686	ENSMUSG00000071454	Dtnb	chr12	+	MXE	spermatogonia
687	ENSMUSG00000038766	Gabpb2	chr3	-	MXE	spermatogonia
688	ENSMUSG00000029676	Pot1a	chr6	-	MXE	spermatogonia
689	ENSMUSG00000030982	9030624J02Rik	chr7	+	MXE	spermatogonia
690	ENSMUSG00000020289	Nprl3	chr11	-	MXE	spermatogonia
691	ENSMUSG00000020954	Strn3	chr12	-	MXE	spermatogonia
692	ENSMUSG00000020914	Top2a	chr11	-	MXE	spermatogonia
693	ENSMUSG00000024991	Eif3a	chr19	-	MXE	spermatogonia
694	ENSMUSG00000018474	Chd3	chr11	-	MXE	spermatogonia
695	ENSMUSG00000022228	Zscan26	chr13	-	MXE	spermatogonia
696	ENSMUSG00000040771	Oard1	chr17	+	MXE	spermatogonia
697	ENSMUSG00000028484	Psip1	chr4	-	MXE	spermatogonia
698	ENSMUSG00000027855	Sycp1	chr3	-	MXE	spermatogonia
699	ENSMUSG00000030089	Slc41a3	chr6	+	MXE	spermatogonia
700	ENSMUSG00000026384	Ptpn4	chr1	-	MXE	spermatogonia
701	ENSMUSG00000007670	Khsrp	chr17	-	MXE	spermatogonia
702	ENSMUSG00000023984	Gm20517	chr17	+	MXE	spermatogonia
703	ENSMUSG00000032198	Dock6	chr9	-	MXE	spermatogonia
704	ENSMUSG00000031068	Glrx3	chr7	+	MXE	spermatogonia
705	ENSMUSG00000015365	Mov10l1	chr15	+	MXE	spermatogonia
706	ENSMUSG00000025076	Casp7	chr19	+	MXE	spermatogonia
707	ENSMUSG00000020265	Sumo3	chr10	+	MXE	spermatogonia
708	ENSMUSG00000025531	Chm	chrX	-	MXE	spermatogonia
709	ENSMUSG00000035683	Melk	chr4	+	MXE	spermatogonia
710	ENSMUSG00000036893	Ehmt1	chr2	-	MXE	spermatogonia
711	ENSMUSG00000005625	Psmd4	chr3	-	MXE	spermatogonia
712	ENSMUSG00000027018	Hat1	chr2	+	MXE	spermatogonia
713	ENSMUSG00000058392	Rrp1b	chr17	+	MXE	spermatogonia
714	ENSMUSG00000044005	Gls2	chr10	+	MXE	spermatogonia
715	ENSMUSG00000025860	Xiap	chrX	+	MXE	spermatogonia
716	ENSMUSG00000098950	Gm28036	chr2	-	MXE	spermatogonia
717	ENSMUSG00000003452	Bicd1	chr6	+	MXE	spermatogonia
718	ENSMUSG00000035392	Dennd1a	chr2	-	MXE	spermatogonia
719	ENSMUSG00000028156	Eif4e	chr3	+	MXE	spermatogonia
720	ENSMUSG00000061904	Slc25a3	chr10	-	MXE	spermatogonia
721	ENSMUSG00000029267	Mtf2	chr5	+	MXE	spermatogonia
722	ENSMUSG00000030435	U2af2	chr7	+	MXE	spermatogonia
723	ENSMUSG00000022680	Pdxdc1	chr16	-	MXE	spermatogonia
724	ENSMUSG00000097993	Ptprv	chr1	-	MXE	spermatogonia
725	ENSMUSG00000033392	Clasp2	chr9	+	MXE	spermatogonia
726	ENSMUSG00000002395	Use1	chr8	+	MXE	spermatogonia
727	ENSMUSG00000036792	Mbd5	chr2	+	MXE	spermatogonia
728	ENSMUSG00000070000	Fcho1	chr8	-	MXE	spermatogonia
729	ENSMUSG00000019738	Polr2i	chr7	+	MXE	spermatogonia
730	ENSMUSG00000028434	Epb41l4b	chr4	-	MXE	spermatogonia
731	ENSMUSG00000024165	Hn1l	chr17	-	MXE	spermatogonia
732	ENSMUSG00000039671	Zmynd8	chr2	-	MXE	spermatogonia
733	ENSMUSG00000028788	Ptp4a2	chr4	+	MXE	spermatogonia
734	ENSMUSG00000057637	Prdm2	chr4	-	MXE	spermatogonia
735	ENSMUSG00000024074	Crim1	chr17	+	MXE	spermatogonia
736	ENSMUSG00000027411	Vps16	chr2	+	MXE	spermatogonia
737	ENSMUSG00000004562	Arhgef40	chr14	+	MXE	spermatogonia
738	ENSMUSG00000018425	Dhx40	chr11	-	MXE	spermatogonia
739	ENSMUSG00000021552	Gkap1	chr13	-	MXE	spermatogonia
740	ENSMUSG00000032000	Birc3	chr9	-	MXE	spermatogonia
741	ENSMUSG00000038943	Prc1	chr7	+	MXE	spermatogonia
742	ENSMUSG00000035325	Sec31a	chr5	-	MXE	spermatogonia
743	ENSMUSG00000022100	Xpo7	chr14	-	MXE	spermatogonia
744	ENSMUSG00000037172	E330009J07Rik	chr6	-	MXE	spermatogonia
745	ENSMUSG00000023079	Gtf2ird1	chr5	-	MXE	spermatogonia
746	ENSMUSG00000000804	Usp32	chr11	-	MXE	spermatogonia
747	ENSMUSG00000043962	Thrap3	chr4	-	MXE	spermatogonia
748	ENSMUSG00000027170	Eif3m	chr2	-	MXE	spermatogonia
749	ENSMUSG00000017119	Nbr1	chr11	+	MXE	spermatogonia
750	ENSMUSG00000034543	Morc2a	chr11	+	MXE	spermatogonia
751	ENSMUSG00000029390	Tmed2	chr5	+	MXE	spermatogonia
752	ENSMUSG00000062604	Srpk2	chr5	-	MXE	spermatogonia
753	ENSMUSG00000052298	Cdc42se2	chr11	-	MXE	spermatogonia
754	ENSMUSG00000009376	Met	chr6	+	MXE	spermatogonia
755	ENSMUSG00000015090	Ptgds	chr2	-	MXE	spermatogonia
756	ENSMUSG00000032411	Tfdp2	chr9	+	MXE	spermatogonia
757	ENSMUSG00000024764	Naa40	chr19	-	MXE	spermatogonia
758	ENSMUSG00000037236	Matr3	chr18	+	MXE	spermatogonia
759	ENSMUSG00000028693	Nasp	chr4	-	MXE	spermatogonia
760	ENSMUSG00000007458	M6pr	chr6	+	MXE	spermatogonia
761	ENSMUSG00000026775	Yme1l1	chr2	+	MXE	spermatogonia
762	ENSMUSG00000003316	Glg1	chr8	-	MXE	spermatogonia
763	ENSMUSG00000022708	Zbtb20	chr16	+	MXE	spermatogonia
764	ENSMUSG00000040785	Ttc3	chr16	+	MXE	spermatogonia
765	ENSMUSG00000075569	Rsph10b	chr5	+	MXE	spermatogonia
766	ENSMUSG00000010721	Lmbr1	chr5	-	MXE	spermatogonia
767	ENSMUSG00000029478	Ncor2	chr5	-	MXE	spermatogonia
768	ENSMUSG00000030846	Tial1	chr7	-	MXE	spermatogonia
769	ENSMUSG00000028032	Papss1	chr3	+	MXE	spermatogonia
770	ENSMUSG00000032254	Kif23	chr9	-	MXE	spermatogonia
771	ENSMUSG00000022607	Ptk2	chr15	-	MXE	spermatogonia
772	ENSMUSG00000018372	Cep95	chr11	+	MXE	spermatogonia
773	ENSMUSG00000073643	Wdfy1	chr1	-	MXE	spermatogonia
774	ENSMUSG00000024843	Chka	chr19	+	MXE	spermatogonia
775	ENSMUSG00000032231	Anxa2	chr9	+	MXE	spermatogonia
776	ENSMUSG00000046434	Hnrnpa1	chr15	+	MXE	spermatogonia
777	ENSMUSG00000021493	Pdlim7	chr13	-	MXE	spermatogonia
778	ENSMUSG00000030611	Mrps11	chr7	+	MXE	spermatogonia
779	ENSMUSG00000050043	Tmx2	chr2	-	MXE	spermatogonia
780	ENSMUSG00000030638	Sh3gl3	chr7	+	MXE	spermatogonia
781	ENSMUSG00000030706	Mrpl48	chr7	-	MXE	spermatogonia
782	ENSMUSG00000069769	Msi2	chr11	-	MXE	spermatogonia
783	ENSMUSG00000052102	Gnpda1	chr18	-	MXE	spermatogonia
784	ENSMUSG00000024885	Aldh3b1	chr19	-	MXE	spermatogonia
785	ENSMUSG00000022034	Esco2	chr14	-	MXE	spermatogonia
786	ENSMUSG00000043885	Slc36a4	chr9	+	MXE	spermatogonia
787	ENSMUSG00000031684	Slc10a7	chr8	+	MXE	spermatogonia
788	ENSMUSG00000071415	Rpl23	chr11	-	MXE	spermatogonia
789	ENSMUSG00000027942	4933434E20Rik	chr3	+	MXE	spermatogonia
790	ENSMUSG00000019843	Fyn	chr10	+	MXE	spermatogonia
791	ENSMUSG00000024817	Uhrf2	chr19	+	MXE	spermatogonia
792	ENSMUSG00000042498	D330045A20Rik	chrX	+	MXE	spermatogonia
793	ENSMUSG00000074578	Zfas1	chr2	+	MXE	spermatogonia
794	ENSMUSG00000027200	Sema6d	chr2	+	MXE	spermatogonia
795	ENSMUSG00000038295	Atg9b	chr5	-	MXE	spermatogonia
796	ENSMUSG00000010936	Vac14	chr8	+	MXE	spermatogonia
797	ENSMUSG00000061613	U2af1	chr17	-	MXE	spermatogonia
798	ENSMUSG00000054477	Kcnn2	chr18	+	MXE	spermatogonia
799	ENSMUSG00000027752	Exosc8	chr3	-	MXE	spermatogonia
800	ENSMUSG00000062115	Rai1	chr11	+	MXE	spermatogonia
801	ENSMUSG00000010796	Asz1	chr6	-	MXE	spermatogonia
802	ENSMUSG00000023764	Sfi1	chr11	-	MXE	spermatogonia
803	ENSMUSG00000025939	Ube2w	chr1	-	MXE	spermatogonia
804	ENSMUSG00000092137	Gcom1	chr9	-	MXE	spermatogonia
805	ENSMUSG00000036223	Ska1	chr18	-	MXE	spermatogonia
806	ENSMUSG00000024911	Fibp	chr19	+	MXE	spermatogonia
807	ENSMUSG00000028621	Cyb5rl	chr4	+	MXE	spermatogonia
808	ENSMUSG00000032479	Map4	chr9	+	MXE	spermatogonia
809	ENSMUSG00000028758	Kif17	chr4	+	MXE	spermatogonia
810	ENSMUSG00000001419	Mef2d	chr3	+	MXE	spermatogonia
811	ENSMUSG00000053768	Chchd3	chr6	-	MXE	spermatogonia
812	ENSMUSG00000035673	Sbno2	chr10	-	MXE	spermatogonia
813	ENSMUSG00000020766	Galk1	chr11	-	MXE	spermatogonia
814	ENSMUSG00000022432	Smc1b	chr15	-	MXE	spermatogonia
815	ENSMUSG00000024163	Mapk8ip3	chr17	-	MXE	spermatogonia
816	ENSMUSG00000060073	Psma3	chr12	+	MXE	spermatogonia
817	ENSMUSG00000026014	Raph1	chr1	-	MXE	spermatogonia
818	ENSMUSG00000032525	Nktr	chr9	+	MXE	spermatogonia
819	ENSMUSG00000035027	Map2k2	chr10	+	MXE	spermatogonia
820	ENSMUSG00000071866	Ppia	chr11	+	MXE	spermatogonia
821	ENSMUSG00000028943	Espn	chr4	-	MXE	spermatogonia
822	ENSMUSG00000026617	Bpnt1	chr1	+	MXE	spermatogonia
823	ENSMUSG00000028109	Hormad1	chr3	+	MXE	spermatogonia
824	ENSMUSG00000035958	Tdp2	chr13	+	MXE	spermatogonia
825	ENSMUSG00000002014	Ssr4	chrX	+	MXE	spermatogonia
826	ENSMUSG00000033487	Fndc3a	chr14	-	MXE	spermatogonia
827	ENSMUSG00000028410	Dnaja1	chr4	+	MXE	spermatogonia
828	ENSMUSG00000052406	Rexo4	chr2	-	MXE	spermatogonia
829	ENSMUSG00000029071	Dvl1	chr4	+	MXE	spermatogonia
830	ENSMUSG00000040666	Sh3bgr	chr16	+	MXE	spermatogonia
831	ENSMUSG00000025724	Sec11a	chr7	-	MXE	spermatogonia
832	ENSMUSG00000030403	Vasp	chr7	-	MXE	spermatogonia
833	ENSMUSG00000026872	Zeb2	chr2	-	MXE	spermatogonia
834	ENSMUSG00000026181	Ppm1f	chr16	+	MXE	spermatogonia
835	ENSMUSG00000028797	Tmem234	chr4	+	MXE	spermatogonia
836	ENSMUSG00000019841	Rev3l	chr10	+	MXE	spermatogonia
837	ENSMUSG00000015143	Actn1	chr12	-	MXE	spermatogonia
838	ENSMUSG00000029823	Luc7l2	chr6	+	MXE	spermatogonia
839	ENSMUSG00000025583	Rptor	chr11	+	MXE	spermatogonia
840	ENSMUSG00000028383	Hsdl2	chr4	+	MXE	spermatogonia
841	ENSMUSG00000022808	Snx4	chr16	+	MXE	spermatogonia
842	ENSMUSG00000045962	Wnk1	chr6	-	MXE	spermatogonia
843	ENSMUSG00000020946	Gosr2	chr11	-	MXE	spermatogonia
844	ENSMUSG00000004642	Slbp	chr5	-	MXE	spermatogonia
845	ENSMUSG00000037013	Ss18	chr18	-	MXE	spermatogonia
846	ENSMUSG00000028657	Ppt1	chr4	+	MXE	spermatogonia
847	ENSMUSG00000026837	Col5a1	chr2	+	MXE	spermatogonia
848	ENSMUSG00000053332	Gas5	chr1	+	MXE	spermatogonia
849	ENSMUSG00000019699	Akt3	chr1	-	MXE	spermatogonia
850	ENSMUSG00000022521	Crebbp	chr16	-	MXE	spermatogonia
851	ENSMUSG00000019996	Map7	chr10	+	MXE	spermatogonia
852	ENSMUSG00000051331	Cacna1c	chr6	-	MXE	spermatogonia
853	ENSMUSG00000027680	Fxr1	chr3	+	MXE	spermatogonia
854	ENSMUSG00000025529	Zfp711	chrX	+	MXE	spermatogonia
855	ENSMUSG00000030884	Uqcrc2	chr7	+	MXE	spermatogonia
856	ENSMUSG00000044600	Smim7	chr8	-	MXE	spermatogonia
857	ENSMUSG00000006527	Sfmbt1	chr14	+	MXE	spermatogonia
858	ENSMUSG00000014550	Rbsn	chr6	-	MXE	spermatogonia
859	ENSMUSG00000028438	Kif24	chr4	-	MXE	spermatogonia
860	ENSMUSG00000030761	Myo7a	chr7	-	MXE	spermatogonia
861	ENSMUSG00000024236	Svil	chr18	+	MXE	spermatogonia
862	ENSMUSG00000033790	Tubgcp5	chr7	+	MXE	spermatogonia
863	ENSMUSG00000024122	Pdpk1	chr17	-	MXE	spermatogonia
864	ENSMUSG00000018574	Acadvl	chr11	-	MXE	spermatogonia
865	ENSMUSG00000028894	Inpp5b	chr4	+	MXE	spermatogonia
866	ENSMUSG00000025323	Sp4	chr12	-	MXE	spermatogonia
867	ENSMUSG00000000340	Dbt	chr3	+	MXE	spermatogonia
868	ENSMUSG00000055013	Agap1	chr1	+	MXE	spermatogonia
869	ENSMUSG00000028411	Aptx	chr4	-	MXE	spermatogonia
870	ENSMUSG00000054405	Dnajc8	chr4	+	MXE	spermatogonia
871	ENSMUSG00000015942	Gtf2ird2	chr5	+	MXE	spermatogonia
872	ENSMUSG00000094985	Topaz1	chr9	+	MXE	spermatogonia
873	ENSMUSG00000034998	Foxn2	chr17	+	MXE	spermatogonia
874	ENSMUSG00000099083	Atf7	chr15	-	MXE	spermatogonia
875	ENSMUSG00000020166	Cnot2	chr10	-	MXE	spermatogonia
876	ENSMUSG00000038005	Hpf1	chr8	+	MXE	spermatogonia
877	ENSMUSG00000028690	Mmachc	chr4	-	MXE	spermatogonia
878	ENSMUSG00000056724	Nbeal2	chr9	-	MXE	spermatogonia
879	ENSMUSG00000003814	Calr	chr8	-	MXE	spermatogonia
880	ENSMUSG00000005417	Mprip	chr11	+	MXE	spermatogonia
881	ENSMUSG00000024392	Bag6	chr17	+	MXE	spermatogonia
882	ENSMUSG00000042613	Pbxip1	chr3	+	MXE	spermatogonia
883	ENSMUSG00000030491	Tdrd12	chr7	-	MXE	spermatogonia
884	ENSMUSG00000022255	Mtdh	chr15	+	MXE	spermatogonia
885	ENSMUSG00000042508	Dmtf1	chr5	-	MXE	spermatogonia
886	ENSMUSG00000063524	Eno1	chr4	+	MXE	spermatogonia
887	ENSMUSG00000029674	Limk1	chr5	-	MXE	spermatogonia
888	ENSMUSG00000005899	Smpd4	chr16	+	MXE	spermatogonia
889	ENSMUSG00000038861	Pi4kb	chr3	+	MXE	spermatogonia
890	ENSMUSG00000041408	Wapl	chr14	+	MXE	spermatogonia
891	ENSMUSG00000002109	Ddb2	chr2	-	MXE	spermatogonia
892	ENSMUSG00000027900	Dram2	chr3	+	MXE	spermatogonia
893	ENSMUSG00000027422	Rrbp1	chr2	-	MXE	spermatogonia
894	ENSMUSG00000024997	Prdx3	chr19	-	MXE	spermatogonia
895	ENSMUSG00000045411	2410002F23Rik	chr7	+	MXE	spermatogonia
896	ENSMUSG00000001052	Sec24b	chr3	-	MXE	spermatogonia
897	ENSMUSG00000055762	Eef1d	chr15	-	MXE	spermatogonia
898	ENSMUSG00000033530	Ttc7b	chr12	-	MXE	spermatogonia
899	ENSMUSG00000021807	2700060E02Rik	chr14	-	MXE	spermatogonia
900	ENSMUSG00000037697	Ddhd1	chr14	-	MXE	spermatogonia
901	ENSMUSG00000040451	Sgms1	chr19	-	MXE	spermatogonia
902	ENSMUSG00000057963	Itpk1	chr12	-	MXE	spermatogonia
903	ENSMUSG00000060126	Tpt1	chr14	+	MXE	spermatogonia
904	ENSMUSG00000035268	Pkig	chr2	+	MXE	spermatogonia
905	ENSMUSG00000040774	Cept1	chr3	-	MXE	spermatogonia
906	ENSMUSG00000007564	Ppp2r1a	chr17	+	MXE	spermatogonia
907	ENSMUSG00000002076	Hsf2bp	chr17	-	MXE	spermatogonia
908	ENSMUSG00000007812	Zfp655	chr5	+	MXE	spermatogonia
909	ENSMUSG00000036009	Mettl25	chr10	-	MXE	spermatogonia
910	ENSMUSG00000027309	4930402H24Rik	chr2	-	MXE	spermatogonia
911	ENSMUSG00000020461	Clhc1	chr11	+	MXE	spermatogonia
912	ENSMUSG00000041147	Brca2	chr5	+	MXE	spermatogonia
913	ENSMUSG00000017478	Zc3h18	chr8	+	MXE	spermatogonia
914	ENSMUSG00000006315	Tmem147	chr7	-	MXE	spermatogonia
915	ENSMUSG00000010342	Tex14	chr11	+	MXE	spermatogonia
916	ENSMUSG00000021115	Vrk1	chr12	+	MXE	spermatogonia
917	ENSMUSG00000018565	Elp5	chr11	-	MXE	spermatogonia
918	ENSMUSG00000038296	Galnt18	chr7	-	MXE	spermatogonia
919	ENSMUSG00000022641	Bbx	chr16	-	MXE	spermatogonia
920	ENSMUSG00000025025	Mxi1	chr19	+	MXE	spermatogonia
921	ENSMUSG00000042705	Commd10	chr18	+	MXE	spermatogonia
922	ENSMUSG00000020102	Slc16a7	chr10	-	MXE	spermatogonia
923	ENSMUSG00000039577	Nphp4	chr4	+	MXE	spermatogonia
924	ENSMUSG00000019878	Hsf2	chr10	+	MXE	spermatogonia
925	ENSMUSG00000008575	Nfib	chr4	-	MXE	spermatogonia
926	ENSMUSG00000021589	Rhobtb3	chr13	-	MXE	spermatogonia
927	ENSMUSG00000030852	Tacc2	chr7	+	MXE	spermatogonia
928	ENSMUSG00000022914	Brwd1	chr16	-	MXE	spermatogonia
929	ENSMUSG00000030447	Cyfip1	chr7	+	MXE	spermatogonia
930	ENSMUSG00000031311	Nono	chrX	+	MXE	spermatogonia
931	ENSMUSG00000027931	Npr1	chr3	-	MXE	spermatogonia
932	ENSMUSG00000030815	Phkg2	chr7	+	MXE	spermatogonia
933	ENSMUSG00000022677	Fopnl	chr16	-	MXE	spermatogonia
934	ENSMUSG00000029192	Tbc1d14	chr5	-	MXE	spermatogonia
935	ENSMUSG00000037627	Rgs22	chr15	-	MXE	spermatogonia
936	ENSMUSG00000039952	Dag1	chr9	-	MXE	spermatogonia
937	ENSMUSG00000035376	Hacd2	chr16	+	MXE	spermatogonia
938	ENSMUSG00000029550	Sppl3	chr5	+	MXE	spermatogonia
939	ENSMUSG00000026743	Mllt10	chr2	+	MXE	spermatogonia
940	ENSMUSG00000057101	Zfp180	chr7	+	MXE	spermatogonia
941	ENSMUSG00000024527	Afg3l2	chr18	-	MXE	spermatogonia
942	ENSMUSG00000021870	Slmap	chr14	-	MXE	spermatogonia
943	ENSMUSG00000027312	Atrn	chr2	+	MXE	spermatogonia
944	ENSMUSG00000025964	Adam23	chr1	+	MXE	spermatogonia
945	ENSMUSG00000022533	Atp13a3	chr16	-	MXE	spermatogonia
946	ENSMUSG00000027201	Myef2	chr2	-	MXE	spermatogonia
947	ENSMUSG00000025786	Zdhhc3	chr9	-	MXE	spermatogonia
948	ENSMUSG00000051344	Plekhm3	chr1	-	MXE	spermatogonia
949	ENSMUSG00000024477	Pggt1b	chr18	-	MXE	spermatogonia
950	ENSMUSG00000010406	Mrpl52	chr14	+	MXE	spermatogonia
951	ENSMUSG00000026385	Dbi	chr1	-	MXE	spermatogonia
952	ENSMUSG00000043384	Gprasp1	chrX	+	MXE	spermatogonia
953	ENSMUSG00000028391	Wdr31	chr4	-	MXE	spermatogonia
954	ENSMUSG00000042700	Sipa1l1	chr12	+	MXE	spermatogonia
955	ENSMUSG00000024357	Sil1	chr18	-	MXE	spermatogonia
956	ENSMUSG00000031731	Ap1g1	chr8	+	MXE	spermatogonia
957	ENSMUSG00000034413	Neurl1b	chr17	+	MXE	spermatogonia
958	ENSMUSG00000021764	Ndufs4	chr13	-	MXE	spermatogonia
959	ENSMUSG00000031987	Egln1	chr8	-	MXE	spermatogonia
960	ENSMUSG00000017756	Slc12a7	chr13	+	MXE	spermatogonia
961	ENSMUSG00000032194	Kank2	chr9	-	MXE	spermatogonia
962	ENSMUSG00000031753	Cog4	chr8	+	MXE	spermatogonia
963	ENSMUSG00000050856	Atp5k	chr5	-	MXE	spermatogonia
964	ENSMUSG00000019820	Utrn	chr10	-	MXE	spermatogonia
965	ENSMUSG00000029227	Fip1l1	chr5	+	MXE	spermatogonia
966	ENSMUSG00000013236	Ptprs	chr17	-	MXE	spermatogonia
967	ENSMUSG00000024598	Fbn2	chr18	-	MXE	spermatogonia
968	ENSMUSG00000032294	Pkm	chr9	+	MXE	spermatogonia
969	ENSMUSG00000030557	Mef2a	chr7	-	MXE	spermatogonia
970	ENSMUSG00000027455	Nsfl1c	chr2	+	MXE	spermatogonia
971	ENSMUSG00000026439	Rbbp5	chr1	+	MXE	spermatogonia
972	ENSMUSG00000092558	Med20	chr17	+	MXE	spermatogonia
973	ENSMUSG00000039176	Polg	chr7	-	MXE	spermatogonia
974	ENSMUSG00000034566	Atp5h	chr11	-	MXE	spermatogonia
975	ENSMUSG00000022246	Rai14	chr15	-	MXE	spermatogonia
976	ENSMUSG00000032418	Me1	chr9	-	MXE	spermatogonia
977	ENSMUSG00000092203	1110038B12Rik	chr17	-	MXE	spermatogonia
978	ENSMUSG00000055065	Ddx17	chr15	-	MXE	spermatogonia
979	ENSMUSG00000026820	Ptges2	chr2	+	MXE	spermatogonia
980	ENSMUSG00000028300	3110043O21Rik	chr4	-	MXE	spermatogonia
981	ENSMUSG00000052752	Traf7	chr17	-	MXE	spermatogonia
982	ENSMUSG00000047215	Rpl9	chr5	-	MXE	spermatogonia
983	ENSMUSG00000038777	Sema6c	chr3	+	MXE	spermatogonia
984	ENSMUSG00000001998	Ap4e1	chr2	+	MXE	spermatogonia
985	ENSMUSG00000030849	Fgfr2	chr7	-	MXE	spermatogonia
986	ENSMUSG00000032615	Nt5m	chr11	+	MXE	spermatogonia
987	ENSMUSG00000021996	Esd	chr14	+	MXE	spermatogonia
988	ENSMUSG00000028782	Adgrb2	chr4	+	MXE	spermatogonia
989	ENSMUSG00000029836	Cbx3	chr6	+	MXE	spermatogonia
990	ENSMUSG00000057858	Fam204a	chr19	-	MXE	spermatogonia
991	ENSMUSG00000037475	Thoc2	chrX	-	MXE	spermatogonia
992	ENSMUSG00000038264	Sema7a	chr9	+	MXE	spermatogonia
993	ENSMUSG00000026021	Sumo1	chr1	-	MXE	spermatogonia
994	ENSMUSG00000020516	Rps6kb1	chr11	-	MXE	spermatogonia
995	ENSMUSG00000058835	Abi1	chr2	-	MXE	spermatogonia
996	ENSMUSG00000035781	R3hdm4	chr10	-	MXE	spermatogonia
997	ENSMUSG00000031821	Gins2	chr8	-	MXE	spermatogonia
998	ENSMUSG00000025745	Hadha	chr5	-	MXE	spermatogonia
999	ENSMUSG00000024462	Gabbr1	chr17	+	MXE	spermatogonia
1000	ENSMUSG00000032399	Rpl4	chr9	+	MXE	spermatogonia
1001	ENSMUSG00000027598	Itch	chr2	+	MXE	spermatogonia
1002	ENSMUSG00000040594	Ranbp17	chr11	-	MXE	spermatogonia
1003	ENSMUSG00000023150	Ivns1abp	chr1	+	MXE	spermatogonia
1004	ENSMUSG00000057363	Uxs1	chr1	-	MXE	spermatogonia
1005	ENSMUSG00000029433	Diablo	chr5	-	MXE	spermatogonia
1006	ENSMUSG00000071267	Zfp942	chr17	-	MXE	spermatogonia
1007	ENSMUSG00000036502	Tmem255a	chrX	-	MXE	spermatogonia
1008	ENSMUSG00000027829	Ccnl1	chr3	-	MXE	spermatogonia
1009	ENSMUSG00000024068	Spast	chr17	+	MXE	spermatogonia
1010	ENSMUSG00000003033	Ap1m1	chr8	+	MXE	spermatogonia
1011	ENSMUSG00000053641	Dennd4a	chr9	+	MXE	spermatogonia
1012	ENSMUSG00000062270	Morf4l1	chr9	-	MXE	spermatogonia
1013	ENSMUSG00000061882	Ccdc62	chr5	+	MXE	spermatogonia
1014	ENSMUSG00000027523	Gnas	chr2	+	MXE	spermatogonia
1015	ENSMUSG00000027109	Sp3	chr2	-	MXE	spermatogonia
1016	ENSMUSG00000023923	Tbc1d5	chr17	-	MXE	spermatogonia
1017	ENSMUSG00000021686	Ap3b1	chr13	+	MXE	spermatogonia
1018	ENSMUSG00000030051	Aplf	chr6	-	MXE	spermatogonia
1019	ENSMUSG00000027394	Ttl	chr2	+	MXE	spermatogonia
1020	ENSMUSG00000022378	Fam49b	chr15	-	MXE	spermatogonia
1021	ENSMUSG00000038535	Zfp280d	chr9	+	MXE	spermatogonia
1022	ENSMUSG00000058756	Thra	chr11	+	MXE	spermatogonia
1023	ENSMUSG00000027287	Snap23	chr2	+	MXE	spermatogonia
1024	ENSMUSG00000044712	Slc38a6	chr12	+	MXE	spermatogonia
1025	ENSMUSG00000048000	Gigyf2	chr1	+	MXE	spermatogonia
1026	ENSMUSG00000030741	Spns1	chr7	-	MXE	spermatogonia
1027	ENSMUSG00000019978	Epb41l2	chr10	+	MXE	spermatogonia
1028	ENSMUSG00000030704	Rab6a	chr7	+	MXE	spermatogonia
1029	ENSMUSG00000021669	Col4a3bp	chr13	+	MXE	spermatogonia
1030	ENSMUSG00000028944	Prkag2	chr5	-	MXE	spermatogonia
1031	ENSMUSG00000030016	Zfp638	chr6	+	MXE	spermatogonia
1032	ENSMUSG00000043207	Zmpste24	chr4	-	MXE	spermatogonia
1033	ENSMUSG00000024539	Ptpn2	chr18	-	MXE	spermatogonia
1034	ENSMUSG00000057133	Chd6	chr2	-	MXE	spermatogonia
1035	ENSMUSG00000045136	Tubb2b	chr13	-	MXE	spermatogonia
1036	ENSMUSG00000057530	Ece1	chr4	+	MXE	spermatogonia
1037	ENSMUSG00000023977	Ubr2	chr17	-	MXE	spermatogonia
1038	ENSMUSG00000031586	Rbpms	chr8	-	MXE	spermatogonia
1039	ENSMUSG00000038587	Akap12	chr10	+	MXE	spermatogonia
1040	ENSMUSG00000039585	Myo9a	chr9	+	MXE	spermatogonia
1041	ENSMUSG00000001985	Grik3	chr4	+	MXE	spermatogonia
1042	ENSMUSG00000025217	Btrc	chr19	+	MXE	spermatogonia
1043	ENSMUSG00000037801	Iqch	chr9	-	MXE	spermatogonia
1044	ENSMUSG00000039041	Adrm1	chr2	+	MXE	spermatogonia
1045	ENSMUSG00000013701	Timm23	chr14	-	MXE	spermatogonia
1046	ENSMUSG00000030279	C2cd5	chr6	-	MXE	spermatogonia
1047	ENSMUSG00000021936	Mapk8	chr14	-	MXE	spermatogonia
1048	ENSMUSG00000026074	Map4k4	chr1	+	MXE	spermatogonia
1049	ENSMUSG00000026153	Fam135a	chr1	-	MXE	spermatogonia
1050	ENSMUSG00000021252	Erg28	chr12	-	MXE	spermatogonia
1051	ENSMUSG00000029127	Zbtb49	chr5	-	MXE	spermatogonia
1052	ENSMUSG00000004070	Hmox2	chr16	+	MXE	spermatogonia
1053	ENSMUSG00000037563	Rps16	chr7	+	MXE	spermatogonia
1054	ENSMUSG00000070493	Chchd2	chr5	-	MXE	spermatogonia
1055	ENSMUSG00000038965	Ube2l3	chr16	-	MXE	spermatogonia
1056	ENSMUSG00000031885	Cbfb	chr8	+	MXE	spermatogonia
1057	ENSMUSG00000032740	Ccdc88a	chr11	+	MXE	spermatogonia
1058	ENSMUSG00000052833	Sae1	chr7	-	MXE	spermatogonia
1059	ENSMUSG00000030759	Far1	chr7	+	MXE	spermatogonia
1060	ENSMUSG00000037822	Smim14	chr5	-	MXE	spermatogonia
1061	ENSMUSG00000032253	Phip	chr9	-	MXE	spermatogonia
1062	ENSMUSG00000031626	Sorbs2	chr8	+	MXE	spermatogonia
1063	ENSMUSG00000022672	Prkdc	chr16	+	MXE	spermatogonia
1064	ENSMUSG00000027293	Ehd4	chr2	-	MXE	spermatogonia
1065	ENSMUSG00000074797	Itpa	chr2	+	MXE	spermatogonia
1066	ENSMUSG00000023015	Racgap1	chr15	-	MXE	spermatogonia
1067	ENSMUSG00000032076	Cadm1	chr9	+	MXE	spermatogonia
1068	ENSMUSG00000020646	Mboat2	chr12	+	MXE	spermatogonia
1069	ENSMUSG00000000127	Fer	chr17	+	MXE	spermatogonia
1070	ENSMUSG00000024044	Epb41l3	chr17	+	MXE	spermatogonia
1071	ENSMUSG00000032478	Nme6	chr9	+	MXE	spermatogonia
1072	ENSMUSG00000027799	Nbea	chr3	-	MXE	spermatogonia
1073	ENSMUSG00000017707	Serinc3	chr2	-	MXE	spermatogonia
1074	ENSMUSG00000030714	Sgf29	chr7	+	MXE	spermatogonia
1075	ENSMUSG00000037174	Elf2	chr3	-	MXE	spermatogonia
1076	ENSMUSG00000039753	Fbxl5	chr5	-	MXE	spermatogonia
1077	ENSMUSG00000068040	Tm9sf4	chr2	+	MXE	spermatogonia
1078	ENSMUSG00000037286	Stag1	chr9	+	MXE	spermatogonia
1079	ENSMUSG00000034173	Zbed5	chr5	+	MXE	spermatogonia
1080	ENSMUSG00000009995	Taz	chrX	+	MXE	spermatogonia
1081	ENSMUSG00000022307	Oxr1	chr15	+	MXE	spermatogonia
1082	ENSMUSG00000051768	Xrcc1	chr7	+	MXE	spermatogonia
1083	ENSMUSG00000036550	Cnot1	chr8	-	MXE	spermatogonia
1084	ENSMUSG00000038256	Bcl9	chr3	-	MXE	spermatogonia
1085	ENSMUSG00000025915	Sgk3	chr1	+	MXE	spermatogonia
1086	ENSMUSG00000045100	Slc25a26	chr6	+	MXE	spermatogonia
1087	ENSMUSG00000005102	Eif2ak4	chr2	+	MXE	spermatogonia
1088	ENSMUSG00000075376	Rc3h2	chr2	-	MXE	spermatogonia
1089	ENSMUSG00000071604	Fam189a2	chr19	-	MXE	spermatogonia
1090	ENSMUSG00000022961	Son	chr16	+	MXE	spermatogonia
1091	ENSMUSG00000032724	Abtb2	chr2	+	MXE	spermatogonia
1092	ENSMUSG00000031928	Mre11a	chr9	+	MXE	spermatogonia
1093	ENSMUSG00000042029	Ncapg2	chr12	+	MXE	spermatogonia
1094	ENSMUSG00000029622	Arpc1b	chr5	+	MXE	spermatogonia
1095	ENSMUSG00000029647	Pan3	chr5	+	MXE	spermatogonia
1096	ENSMUSG00000026836	Acvr1	chr2	-	MXE	spermatogonia
1097	ENSMUSG00000022429	Dmc1	chr15	-	MXE	spermatogonia
1098	ENSMUSG00000031896	Ctrl	chr8	-	RI	spermatogonia
1099	ENSMUSG00000025144	Cenpx	chr11	-	RI	spermatogonia
1100	ENSMUSG00000042396	Rbm7	chr9	-	RI	spermatogonia
1101	ENSMUSG00000030795	Fus	chr7	+	RI	spermatogonia
1102	ENSMUSG00000022617	Chkb	chr15	-	RI	spermatogonia
1103	ENSMUSG00000020486	Sept4	chr11	+	RI	spermatogonia
1104	ENSMUSG00000008690	Ncaph2	chr15	+	RI	spermatogonia
1105	ENSMUSG00000022884	Eif4a2	chr16	+	RI	spermatogonia
1106	ENSMUSG00000036281	Snapc4	chr2	-	RI	spermatogonia
1107	ENSMUSG00000042487	Leo1	chr9	+	RI	spermatogonia
1108	ENSMUSG00000014856	Tmem208	chr8	+	RI	spermatogonia
1109	ENSMUSG00000040054	Baz2a	chr10	+	RI	spermatogonia
1110	ENSMUSG00000027667	Zfp639	chr3	+	RI	spermatogonia
1111	ENSMUSG00000031388	Naa10	chrX	-	RI	spermatogonia
1112	ENSMUSG00000022978	Mis18a	chr16	-	RI	spermatogonia
1113	ENSMUSG00000040599	Mis12	chr11	+	RI	spermatogonia
1114	ENSMUSG00000005481	Ddx39	chr8	+	RI	spermatogonia
1115	ENSMUSG00000031601	Cnot7	chr8	-	RI	spermatogonia
1116	ENSMUSG00000027889	Ampd2	chr3	-	RI	spermatogonia
1117	ENSMUSG00000004455	Ppp1cc	chr5	+	RI	spermatogonia
1118	ENSMUSG00000038685	Rtel1	chr2	+	RI	spermatogonia
1119	ENSMUSG00000027655	Dhx35	chr2	+	RI	spermatogonia
1120	ENSMUSG00000098754	Prn	chr2	+	RI	spermatogonia
1121	ENSMUSG00000041459	Tardbp	chr4	-	RI	spermatogonia
1122	ENSMUSG00000038619	Ensa	chr3	+	RI	spermatogonia
1123	ENSMUSG00000042066	Tmcc2	chr1	-	RI	spermatogonia
1124	ENSMUSG00000031161	Hdac6	chrX	-	RI	spermatogonia
1125	ENSMUSG00000026360	Rgs2	chr1	-	RI	spermatogonia
1126	ENSMUSG00000030894	Tpp1	chr7	-	RI	spermatogonia
1127	ENSMUSG00000021868	Ppif	chr14	+	RI	spermatogonia
1128	ENSMUSG00000026553	Copa	chr1	+	RI	spermatogonia
1129	ENSMUSG00000026848	Tor1b	chr2	+	RI	spermatogonia
1130	ENSMUSG00000026083	Eif5b	chr1	+	RI	spermatogonia
1131	ENSMUSG00000008206	Cers4	chr8	+	RI	spermatogonia
1132	ENSMUSG00000036073	Galt	chr4	+	RI	spermatogonia
1133	ENSMUSG00000037791	Phf12	chr11	+	RI	spermatogonia
1134	ENSMUSG00000040459	Arglu1	chr8	-	RI	spermatogonia
1135	ENSMUSG00000042831	Alkbh6	chr7	+	RI	spermatogonia
1136	ENSMUSG00000031537	Ikbkb	chr8	-	RI	spermatogonia
1137	ENSMUSG00000027185	Nat10	chr2	-	RI	spermatogonia
1138	ENSMUSG00000041921	Metap1d	chr2	+	RI	spermatogonia
1139	ENSMUSG00000038637	Lrrc56	chr7	+	RI	spermatogonia
1140	ENSMUSG00000002068	Ccne1	chr7	-	RI	spermatogonia
1141	ENSMUSG00000036067	Slc2a6	chr2	-	RI	spermatogonia
1142	ENSMUSG00000029472	Anapc5	chr5	-	RI	spermatogonia
1143	ENSMUSG00000038429	Usp5	chr6	-	RI	spermatogonia
1144	ENSMUSG00000040029	Ipo8	chr6	-	RI	spermatogonia
1145	ENSMUSG00000045128	Rpl18a	chr8	-	RI	spermatogonia
1146	ENSMUSG00000039318	Rab3gap2	chr1	+	RI	spermatogonia
1147	ENSMUSG00000026107	Nabp1	chr1	-	RI	spermatogonia
1148	ENSMUSG00000029326	Enoph1	chr5	+	RI	spermatogonia
1149	ENSMUSG00000015656	Hspa8	chr9	+	RI	spermatogonia
1150	ENSMUSG00000036672	Cenpt	chr8	-	RI	spermatogonia
1151	ENSMUSG00000029359	Tesc	chr5	+	RI	spermatogonia
1152	ENSMUSG00000028102	Pex11b	chr3	+	RI	spermatogonia
1153	ENSMUSG00000036833	Pnpla7	chr2	+	RI	spermatogonia
1154	ENSMUSG00000046295	Ankle1	chr8	+	RI	spermatogonia
1155	ENSMUSG00000026565	Pou2f1	chr1	-	RI	spermatogonia
1156	ENSMUSG00000037266	Rsrp1	chr4	+	RI	spermatogonia
1157	ENSMUSG00000028393	Alad	chr4	-	RI	spermatogonia
1158	ENSMUSG00000020059	Sycp3	chr10	+	RI	spermatogonia
1159	ENSMUSG00000002763	Pex6	chr17	+	RI	spermatogonia
1160	ENSMUSG00000071644	Eef1g	chr19	+	RI	spermatogonia
1161	ENSMUSG00000039449	Prpf18	chr2	-	RI	spermatogonia
1162	ENSMUSG00000016763	Scube1	chr15	-	RI	spermatogonia
1163	ENSMUSG00000005373	Mlxipl	chr5	+	RI	spermatogonia
1164	ENSMUSG00000025470	Zfp511	chr7	+	RI	spermatogonia
1165	ENSMUSG00000061878	Sphk1	chr11	+	RI	spermatogonia
1166	ENSMUSG00000040356	Skiv2l	chr17	-	RI	spermatogonia
1167	ENSMUSG00000062963	Ufc1	chr1	-	RI	spermatogonia
1168	ENSMUSG00000041096	Tspyl2	chrX	-	RI	spermatogonia
1169	ENSMUSG00000022283	Pabpc1	chr15	-	RI	spermatogonia
1170	ENSMUSG00000034432	Cops8	chr1	+	RI	spermatogonia
1171	ENSMUSG00000026942	Traf2	chr2	-	RI	spermatogonia
1172	ENSMUSG00000031939	Taf1d	chr9	+	RI	spermatogonia
1173	ENSMUSG00000028245	Nsmaf	chr4	-	RI	spermatogonia
1174	ENSMUSG00000043631	Ecm2	chr13	+	RI	spermatogonia
1175	ENSMUSG00000029385	Ccng2	chr5	+	RI	spermatogonia
1176	ENSMUSG00000062908	Acadm	chr3	-	RI	spermatogonia
1177	ENSMUSG00000029068	Ccnl2	chr4	+	RI	spermatogonia
1178	ENSMUSG00000006728	Cdk4	chr10	+	RI	spermatogonia
1179	ENSMUSG00000053291	Rab4b	chr7	-	RI	spermatogonia
1180	ENSMUSG00000074643	Cpne1	chr2	-	RI	spermatogonia
1181	ENSMUSG00000004896	Rrnad1	chr3	-	RI	spermatogonia
1182	ENSMUSG00000029464	Gpn3	chr5	+	RI	spermatogonia
1183	ENSMUSG00000027569	Mrgbp	chr2	+	RI	spermatogonia
1184	ENSMUSG00000038671	Arfrp1	chr2	-	RI	spermatogonia
1185	ENSMUSG00000064127	Med14	chrX	-	RI	spermatogonia
1186	ENSMUSG00000009092	Derl3	chr10	+	RI	spermatogonia
1187	ENSMUSG00000002981	Clptm1	chr7	-	RI	spermatogonia
1188	ENSMUSG00000018999	Slc35b4	chr6	-	RI	spermatogonia
1189	ENSMUSG00000003068	Stk11	chr10	+	RI	spermatogonia
1190	ENSMUSG00000026754	Golga1	chr2	-	RI	spermatogonia
1191	ENSMUSG00000028582	Cc2d1b	chr4	+	RI	spermatogonia
1192	ENSMUSG00000090841	Myl6	chr10	-	RI	spermatogonia
1193	ENSMUSG00000027134	Lpcat4	chr2	+	RI	spermatogonia
1194	ENSMUSG00000019951	Uhrf1bp1l	chr10	+	RI	spermatogonia
1195	ENSMUSG00000020156	Mum1	chr10	+	RI	spermatogonia
1196	ENSMUSG00000003545	Fosb	chr7	-	RI	spermatogonia
1197	ENSMUSG00000003778	Brd8	chr18	-	RI	spermatogonia
1198	ENSMUSG00000026339	Ccdc93	chr1	+	RI	spermatogonia
1199	ENSMUSG00000031310	Zmym3	chrX	-	RI	spermatogonia
1200	ENSMUSG00000005682	Pan2	chr10	+	RI	spermatogonia
1201	ENSMUSG00000028256	Odf2l	chr3	+	RI	spermatogonia
1202	ENSMUSG00000028907	Utp11	chr4	-	RI	spermatogonia
1203	ENSMUSG00000021066	Atl1	chr12	+	RI	spermatogonia
1204	ENSMUSG00000023191	P3h3	chr6	-	RI	spermatogonia
1205	ENSMUSG00000031819	Emc8	chr8	-	RI	spermatogonia
1206	ENSMUSG00000047675	Rps8	chr4	-	RI	spermatogonia
1207	ENSMUSG00000033460	Armcx1	chrX	+	RI	spermatogonia
1208	ENSMUSG00000026889	Rbm18	chr2	-	RI	spermatogonia
1209	ENSMUSG00000037112	Sik2	chr9	-	RI	spermatogonia
1210	ENSMUSG00000073434	Wdr90	chr17	-	RI	spermatogonia
1211	ENSMUSG00000021748	Pdhb	chr14	-	RI	spermatogonia
1212	ENSMUSG00000068876	Cgn	chr3	-	RI	spermatogonia
1213	ENSMUSG00000021494	Ddx41	chr13	-	RI	spermatogonia
1214	ENSMUSG00000004268	Emg1	chr6	-	RI	spermatogonia
1215	ENSMUSG00000032586	Traip	chr9	+	RI	spermatogonia
1216	ENSMUSG00000021428	Riok1	chr13	+	RI	spermatogonia
1217	ENSMUSG00000022613	Miox	chr15	+	RI	spermatogonia
1218	ENSMUSG00000010608	Rbm25	chr12	+	RI	spermatogonia
1219	ENSMUSG00000038412	Higd1a	chr9	-	RI	spermatogonia
1220	ENSMUSG00000040669	Phc1	chr6	-	RI	spermatogonia
1221	ENSMUSG00000031389	Arhgap4	chrX	-	RI	spermatogonia
1222	ENSMUSG00000001062	Vps9d1	chr8	-	RI	spermatogonia
1223	ENSMUSG00000037720	Tmem33	chr5	+	RI	spermatogonia
1224	ENSMUSG00000108414	Snhg1	chr19	+	RI	spermatogonia
1225	ENSMUSG00000039515	Ptpa	chr2	+	RI	spermatogonia
1226	ENSMUSG00000032126	Hmbs	chr9	-	RI	spermatogonia
1227	ENSMUSG00000027371	Fahd2a	chr2	-	RI	spermatogonia
1228	ENSMUSG00000053470	Kdm3a	chr6	-	RI	spermatogonia
1229	ENSMUSG00000005625	Psmd4	chr3	-	RI	spermatogonia
1230	ENSMUSG00000026927	Sdccag3	chr2	-	RI	spermatogonia
1231	ENSMUSG00000020536	Llgl1	chr11	+	RI	spermatogonia
1232	ENSMUSG00000006498	Ptbp1	chr10	+	RI	spermatogonia
1233	ENSMUSG00000028086	Fbxw7	chr3	+	RI	spermatogonia
1234	ENSMUSG00000001750	Tcirg1	chr19	-	RI	spermatogonia
1235	ENSMUSG00000019338	Zfp687	chr3	-	RI	spermatogonia
1236	ENSMUSG00000022552	Sharpin	chr15	-	RI	spermatogonia
1237	ENSMUSG00000002058	Unc119	chr11	+	RI	spermatogonia
1238	ENSMUSG00000032185	Carm1	chr9	+	RI	spermatogonia
1239	ENSMUSG00000041438	Utp4	chr8	+	RI	spermatogonia
1240	ENSMUSG00000026309	Ilkap	chr1	-	RI	spermatogonia
1241	ENSMUSG00000025766	D3Ertd751e	chr3	+	RI	spermatogonia
1242	ENSMUSG00000038644	Pold1	chr7	-	RI	spermatogonia
1243	ENSMUSG00000006736	Tspan31	chr10	-	RI	spermatogonia
1244	ENSMUSG00000053158	Fes	chr7	-	RI	spermatogonia
1245	ENSMUSG00000071337	Tia1	chr6	+	RI	spermatogonia
1246	ENSMUSG00000002395	Use1	chr8	+	RI	spermatogonia
1247	ENSMUSG00000028975	Pex14	chr4	-	RI	spermatogonia
1248	ENSMUSG00000036046	5031439G07Rik	chr15	-	RI	spermatogonia
1249	ENSMUSG00000020608	Smc6	chr12	+	RI	spermatogonia
1250	ENSMUSG00000055024	Ep300	chr15	+	RI	spermatogonia
1251	ENSMUSG00000038618	Rassf7	chr7	+	RI	spermatogonia
1252	ENSMUSG00000025159	Mms19	chr19	-	RI	spermatogonia
1253	ENSMUSG00000001962	Fam50a	chrX	+	RI	spermatogonia
1254	ENSMUSG00000004264	Phb2	chr6	+	RI	spermatogonia
1255	ENSMUSG00000026577	Blzf1	chr1	-	RI	spermatogonia
1256	ENSMUSG00000028759	Hp1bp3	chr4	+	RI	spermatogonia
1257	ENSMUSG00000035228	Ccdc106	chr7	+	RI	spermatogonia
1258	ENSMUSG00000034771	Tle2	chr10	+	RI	spermatogonia
1259	ENSMUSG00000026791	Slc2a8	chr2	-	RI	spermatogonia
1260	ENSMUSG00000041375	Ccdc9	chr7	-	RI	spermatogonia
1261	ENSMUSG00000021819	Zswim8	chr14	+	RI	spermatogonia
1262	ENSMUSG00000051557	Pusl1	chr4	-	RI	spermatogonia
1263	ENSMUSG00000002107	Celf2	chr2	-	RI	spermatogonia
1264	ENSMUSG00000049643	2310022A10Rik	chr7	+	RI	spermatogonia
1265	ENSMUSG00000022322	Shcbp1	chr8	-	RI	spermatogonia
1266	ENSMUSG00000039263	Npepl1	chr2	+	RI	spermatogonia
1267	ENSMUSG00000037400	Atp11b	chr3	+	RI	spermatogonia
1268	ENSMUSG00000063334	Krr1	chr10	+	RI	spermatogonia
1269	ENSMUSG00000021661	Ankra2	chr13	+	RI	spermatogonia
1270	ENSMUSG00000053453	Thoc7	chr14	-	RI	spermatogonia
1271	ENSMUSG00000020359	Phykpl	chr11	+	RI	spermatogonia
1272	ENSMUSG00000030782	Tgfb1i1	chr7	+	RI	spermatogonia
1273	ENSMUSG00000037805	Rpl10a	chr17	+	RI	spermatogonia
1274	ENSMUSG00000028693	Nasp	chr4	-	RI	spermatogonia
1275	ENSMUSG00000007458	M6pr	chr6	+	RI	spermatogonia
1276	ENSMUSG00000047193	Dync2h1	chr9	-	RI	spermatogonia
1277	ENSMUSG00000002804	Nudt14	chr12	-	RI	spermatogonia
1278	ENSMUSG00000036819	Jmjd4	chr11	+	RI	spermatogonia
1279	ENSMUSG00000068329	Htra2	chr6	-	RI	spermatogonia
1280	ENSMUSG00000000902	Smarcb1	chr10	-	RI	spermatogonia
1281	ENSMUSG00000029060	Mib2	chr4	-	RI	spermatogonia
1282	ENSMUSG00000029547	Ints1	chr5	-	RI	spermatogonia
1283	ENSMUSG00000046032	Snx12	chrX	-	RI	spermatogonia
1284	ENSMUSG00000038520	Tbc1d17	chr7	-	RI	spermatogonia
1285	ENSMUSG00000019139	Isyna1	chr8	+	RI	spermatogonia
1286	ENSMUSG00000001909	Trmt1	chr8	+	RI	spermatogonia
1287	ENSMUSG00000044533	Rps2	chr17	+	RI	spermatogonia
1288	ENSMUSG00000031835	Mbtps1	chr8	-	RI	spermatogonia
1289	ENSMUSG00000020362	Cnot6	chr11	-	RI	spermatogonia
1290	ENSMUSG00000034908	Sidt2	chr9	-	RI	spermatogonia
1291	ENSMUSG00000026958	Dpp7	chr2	-	RI	spermatogonia
1292	ENSMUSG00000029386	Tctn2	chr5	+	RI	spermatogonia
1293	ENSMUSG00000029730	Mcm7	chr5	-	RI	spermatogonia
1294	ENSMUSG00000033436	Armcx2	chrX	-	RI	spermatogonia
1295	ENSMUSG00000038346	Zfp384	chr6	+	RI	spermatogonia
1296	ENSMUSG00000028467	Gba2	chr4	-	RI	spermatogonia
1297	ENSMUSG00000027639	Samhd1	chr2	-	RI	spermatogonia
1298	ENSMUSG00000053841	Txlna	chr4	-	RI	spermatogonia
1299	ENSMUSG00000027184	Caprin1	chr2	-	RI	spermatogonia
1300	ENSMUSG00000036661	Dennd3	chr15	+	RI	spermatogonia
1301	ENSMUSG00000016921	Srsf6	chr2	+	RI	spermatogonia
1302	ENSMUSG00000036932	Aifm1	chrX	-	RI	spermatogonia
1303	ENSMUSG00000004100	Ppan	chr9	+	RI	spermatogonia
1304	ENSMUSG00000090862	Rps13	chr7	-	RI	spermatogonia
1305	ENSMUSG00000028469	Npr2	chr4	+	RI	spermatogonia
1306	ENSMUSG00000041945	Mfsd9	chr1	-	RI	spermatogonia
1307	ENSMUSG00000030493	Faap24	chr7	-	RI	spermatogonia
1308	ENSMUSG00000024048	Myl12a	chr17	-	RI	spermatogonia
1309	ENSMUSG00000026672	Optn	chr2	-	RI	spermatogonia
1310	ENSMUSG00000057193	Slc44a2	chr9	+	RI	spermatogonia
1311	ENSMUSG00000032567	Aste1	chr9	+	RI	spermatogonia
1312	ENSMUSG00000030057	Cnbp	chr6	-	RI	spermatogonia
1313	ENSMUSG00000040482	Dxo	chr17	+	RI	spermatogonia
1314	ENSMUSG00000074578	Zfas1	chr2	+	RI	spermatogonia
1315	ENSMUSG00000004891	Nes	chr3	+	RI	spermatogonia
1316	ENSMUSG00000089661	Mia	chr7	-	RI	spermatogonia
1317	ENSMUSG00000036606	Plxnb2	chr15	-	RI	spermatogonia
1318	ENSMUSG00000026269	Rnpepl1	chr1	+	RI	spermatogonia
1319	ENSMUSG00000026821	Ralgds	chr2	+	RI	spermatogonia
1320	ENSMUSG00000010936	Vac14	chr8	+	RI	spermatogonia
1321	ENSMUSG00000066979	Bub3	chr7	+	RI	spermatogonia
1322	ENSMUSG00000024913	Lrp5	chr19	-	RI	spermatogonia
1323	ENSMUSG00000037552	Plekhg2	chr7	-	RI	spermatogonia
1324	ENSMUSG00000034928	Rnf44	chr13	-	RI	spermatogonia
1325	ENSMUSG00000084786	Ubl5	chr9	+	RI	spermatogonia
1326	ENSMUSG00000031641	Cbr4	chr8	+	RI	spermatogonia
1327	ENSMUSG00000060671	Atp8b2	chr3	-	RI	spermatogonia
1328	ENSMUSG00000039103	Nexn	chr3	-	RI	spermatogonia
1329	ENSMUSG00000024160	Spsb3	chr17	+	RI	spermatogonia
1330	ENSMUSG00000014873	Surf2	chr2	+	RI	spermatogonia
1331	ENSMUSG00000057738	Sptan1	chr2	+	RI	spermatogonia
1332	ENSMUSG00000032480	Dhx30	chr9	-	RI	spermatogonia
1333	ENSMUSG00000002055	Spag5	chr11	+	RI	spermatogonia
1334	ENSMUSG00000002342	Tmem161a	chr8	+	RI	spermatogonia
1335	ENSMUSG00000024911	Fibp	chr19	+	RI	spermatogonia
1336	ENSMUSG00000026999	Nup35	chr2	+	RI	spermatogonia
1337	ENSMUSG00000031812	Map1lc3b	chr8	+	RI	spermatogonia
1338	ENSMUSG00000038564	Ift172	chr5	-	RI	spermatogonia
1339	ENSMUSG00000049659	Aftph	chr11	-	RI	spermatogonia
1340	ENSMUSG00000026869	Psmd5	chr2	-	RI	spermatogonia
1341	ENSMUSG00000027677	Ttc14	chr3	+	RI	spermatogonia
1342	ENSMUSG00000027284	Cdan1	chr2	-	RI	spermatogonia
1343	ENSMUSG00000029148	Nrbp1	chr5	+	RI	spermatogonia
1344	ENSMUSG00000042726	Trafd1	chr5	-	RI	spermatogonia
1345	ENSMUSG00000020745	Pafah1b1	chr11	-	RI	spermatogonia
1346	ENSMUSG00000029202	Pds5a	chr5	-	RI	spermatogonia
1347	ENSMUSG00000020877	Scrn2	chr11	+	RI	spermatogonia
1348	ENSMUSG00000030929	Eri2	chr7	-	RI	spermatogonia
1349	ENSMUSG00000033685	Ucp2	chr7	+	RI	spermatogonia
1350	ENSMUSG00000038900	Rpl12	chr2	+	RI	spermatogonia
1351	ENSMUSG00000013858	Tmem259	chr10	-	RI	spermatogonia
1352	ENSMUSG00000078485	Plekhn1	chr4	-	RI	spermatogonia
1353	ENSMUSG00000031816	Mthfsd	chr8	-	RI	spermatogonia
1354	ENSMUSG00000055692	Tmem191c	chr16	+	RI	spermatogonia
1355	ENSMUSG00000025473	Adam8	chr7	-	RI	spermatogonia
1356	ENSMUSG00000024454	Hdac3	chr18	-	RI	spermatogonia
1357	ENSMUSG00000033799	Fam208b	chr13	-	RI	spermatogonia
1358	ENSMUSG00000010110	Stx5a	chr19	+	RI	spermatogonia
1359	ENSMUSG00000033416	Gucd1	chr10	-	RI	spermatogonia
1360	ENSMUSG00000029599	Ddx54	chr5	+	RI	spermatogonia
1361	ENSMUSG00000040532	Abhd11	chr5	+	RI	spermatogonia
1362	ENSMUSG00000026211	Obsl1	chr1	-	RI	spermatogonia
1363	ENSMUSG00000017999	Ddx27	chr2	+	RI	spermatogonia
1364	ENSMUSG00000028453	Fancg	chr4	-	RI	spermatogonia
1365	ENSMUSG00000035024	Ncapd3	chr9	+	RI	spermatogonia
1366	ENSMUSG00000025006	Sorbs1	chr19	-	RI	spermatogonia
1367	ENSMUSG00000029661	Col1a2	chr6	+	RI	spermatogonia
1368	ENSMUSG00000062175	Tgif2	chr2	+	RI	spermatogonia
1369	ENSMUSG00000071866	Ppia	chr11	+	RI	spermatogonia
1370	ENSMUSG00000029146	Snx17	chr5	+	RI	spermatogonia
1371	ENSMUSG00000041361	Myzap	chr9	-	RI	spermatogonia
1372	ENSMUSG00000002014	Ssr4	chrX	+	RI	spermatogonia
1373	ENSMUSG00000012126	Ubxn11	chr4	+	RI	spermatogonia
1374	ENSMUSG00000024327	Slc39a7	chr17	-	RI	spermatogonia
1375	ENSMUSG00000028410	Dnaja1	chr4	+	RI	spermatogonia
1376	ENSMUSG00000020260	Pofut2	chr10	+	RI	spermatogonia
1377	ENSMUSG00000034006	Pqlc1	chr18	+	RI	spermatogonia
1378	ENSMUSG00000039244	E130309D02Rik	chr5	-	RI	spermatogonia
1379	ENSMUSG00000024516	Sec11c	chr18	+	RI	spermatogonia
1380	ENSMUSG00000029071	Dvl1	chr4	+	RI	spermatogonia
1381	ENSMUSG00000016503	Gtf3a	chr5	+	RI	spermatogonia
1382	ENSMUSG00000046671	Mtfr1l	chr4	-	RI	spermatogonia
1383	ENSMUSG00000004846	Plod3	chr5	+	RI	spermatogonia
1384	ENSMUSG00000028248	Pnisr	chr4	+	RI	spermatogonia
1385	ENSMUSG00000034101	Ctnnd1	chr2	-	RI	spermatogonia
1386	ENSMUSG00000019518	Ap4m1	chr5	+	RI	spermatogonia
1387	ENSMUSG00000063884	Ptcd3	chr6	-	RI	spermatogonia
1388	ENSMUSG00000099689	Zfp383	chr7	+	RI	spermatogonia
1389	ENSMUSG00000064307	Lrrc51	chr7	-	RI	spermatogonia
1390	ENSMUSG00000003062	Stard3nl	chr13	-	RI	spermatogonia
1391	ENSMUSG00000044433	Camsap3	chr8	+	RI	spermatogonia
1392	ENSMUSG00000004642	Slbp	chr5	-	RI	spermatogonia
1393	ENSMUSG00000025272	Tro	chrX	-	RI	spermatogonia
1394	ENSMUSG00000030409	Dmpk	chr7	+	RI	spermatogonia
1395	ENSMUSG00000041747	Utp15	chr13	-	RI	spermatogonia
1396	ENSMUSG00000025571	Tnrc6c	chr11	+	RI	spermatogonia
1397	ENSMUSG00000041263	Rusc1	chr3	-	RI	spermatogonia
1398	ENSMUSG00000039660	Spout1	chr2	-	RI	spermatogonia
1399	ENSMUSG00000028959	Fastk	chr5	-	RI	spermatogonia
1400	ENSMUSG00000053332	Gas5	chr1	+	RI	spermatogonia
1401	ENSMUSG00000001305	Rrp15	chr1	-	RI	spermatogonia
1402	ENSMUSG00000035458	Tnni3	chr7	-	RI	spermatogonia
1403	ENSMUSG00000002825	Qtrt1	chr9	+	RI	spermatogonia
1404	ENSMUSG00000015452	Ager	chr17	+	RI	spermatogonia
1405	ENSMUSG00000027680	Fxr1	chr3	+	RI	spermatogonia
1406	ENSMUSG00000020329	Polrmt	chr10	-	RI	spermatogonia
1407	ENSMUSG00000036202	Rif1	chr2	+	RI	spermatogonia
1408	ENSMUSG00000009585	Apobec3	chr15	+	RI	spermatogonia
1409	ENSMUSG00000035545	Leng8	chr7	+	RI	spermatogonia
1410	ENSMUSG00000057335	Cep170	chr1	-	RI	spermatogonia
1411	ENSMUSG00000000605	Clcn4	chr7	-	RI	spermatogonia
1412	ENSMUSG00000035713	Usp35	chr7	-	RI	spermatogonia
1413	ENSMUSG00000032180	Tmed1	chr9	-	RI	spermatogonia
1414	ENSMUSG00000073468	Sft2d1	chr17	+	RI	spermatogonia
1415	ENSMUSG00000028402	Mpdz	chr4	-	RI	spermatogonia
1416	ENSMUSG00000029625	Cpsf4	chr5	+	RI	spermatogonia
1417	ENSMUSG00000032590	Apeh	chr9	-	RI	spermatogonia
1418	ENSMUSG00000030822	Prr14	chr7	+	RI	spermatogonia
1419	ENSMUSG00000026965	Anapc2	chr2	+	RI	spermatogonia
1420	ENSMUSG00000057649	Brd9	chr13	+	RI	spermatogonia
1421	ENSMUSG00000043929	Klhl15	chrX	+	RI	spermatogonia
1422	ENSMUSG00000053964	Lgals4	chr7	+	RI	spermatogonia
1423	ENSMUSG00000021012	Zc3h14	chr12	+	RI	spermatogonia
1424	ENSMUSG00000003031	Cdkn1b	chr6	+	RI	spermatogonia
1425	ENSMUSG00000015094	Npdc1	chr2	+	RI	spermatogonia
1426	ENSMUSG00000029545	Acads	chr5	-	RI	spermatogonia
1427	ENSMUSG00000006299	Aamp	chr1	-	RI	spermatogonia
1428	ENSMUSG00000028849	Map7d1	chr4	-	RI	spermatogonia
1429	ENSMUSG00000032579	Hemk1	chr9	-	RI	spermatogonia
1430	ENSMUSG00000059796	Eif4a1	chr11	-	RI	spermatogonia
1431	ENSMUSG00000027374	Mrps5	chr2	+	RI	spermatogonia
1432	ENSMUSG00000020263	Appl2	chr10	-	RI	spermatogonia
1433	ENSMUSG00000034789	Rab24	chr13	-	RI	spermatogonia
1434	ENSMUSG00000027669	Gnb4	chr3	-	RI	spermatogonia
1435	ENSMUSG00000027381	Bcl2l11	chr2	+	RI	spermatogonia
1436	ENSMUSG00000013997	Nit1	chr1	-	RI	spermatogonia
1437	ENSMUSG00000033819	Ppp1r16a	chr15	+	RI	spermatogonia
1438	ENSMUSG00000029713	Gnb2	chr5	-	RI	spermatogonia
1439	ENSMUSG00000027968	Larp7	chr3	-	RI	spermatogonia
1440	ENSMUSG00000020372	Rack1	chr11	+	RI	spermatogonia
1441	ENSMUSG00000031066	Usp11	chrX	+	RI	spermatogonia
1442	ENSMUSG00000005687	Bcas2	chr3	+	RI	spermatogonia
1443	ENSMUSG00000011114	Tbrg1	chr9	-	RI	spermatogonia
1444	ENSMUSG00000026127	Imp4	chr1	+	RI	spermatogonia
1445	ENSMUSG00000002109	Ddb2	chr2	-	RI	spermatogonia
1446	ENSMUSG00000021532	Fastkd3	chr13	+	RI	spermatogonia
1447	ENSMUSG00000058740	Kcnt1	chr2	+	RI	spermatogonia
1448	ENSMUSG00000097195	Snhg5	chr9	-	RI	spermatogonia
1449	ENSMUSG00000047909	Ankrd16	chr2	+	RI	spermatogonia
1450	ENSMUSG00000045411	2410002F23Rik	chr7	+	RI	spermatogonia
1451	ENSMUSG00000044573	Acp1	chr12	-	RI	spermatogonia
1452	ENSMUSG00000002997	Prkar2b	chr12	-	RI	spermatogonia
1453	ENSMUSG00000043243	Fam129c	chr8	+	RI	spermatogonia
1454	ENSMUSG00000019897	Ccdc59	chr10	+	RI	spermatogonia
1455	ENSMUSG00000035278	Plekhj1	chr10	-	RI	spermatogonia
1456	ENSMUSG00000094870	Zfp131	chr13	-	RI	spermatogonia
1457	ENSMUSG00000040441	Slc26a10	chr10	-	RI	spermatogonia
1458	ENSMUSG00000035623	Rsf1	chr7	+	RI	spermatogonia
1459	ENSMUSG00000056962	Jmjd6	chr11	-	RI	spermatogonia
1460	ENSMUSG00000020817	Rabep1	chr11	+	RI	spermatogonia
1461	ENSMUSG00000037326	Capn15	chr17	-	RI	spermatogonia
1462	ENSMUSG00000085385	Snhg17	chr2	-	RI	spermatogonia
1463	ENSMUSG00000033055	Ankrd54	chr15	-	RI	spermatogonia
1464	ENSMUSG00000007029	Vars	chr17	+	RI	spermatogonia
1465	ENSMUSG00000034684	Sema3f	chr9	-	RI	spermatogonia
1466	ENSMUSG00000097248	Gm2694	chr8	+	RI	spermatogonia
1467	ENSMUSG00000031708	Tecr	chr8	-	RI	spermatogonia
1468	ENSMUSG00000036002	Fam214b	chr4	-	RI	spermatogonia
1469	ENSMUSG00000029166	Mapre3	chr5	+	RI	spermatogonia
1470	ENSMUSG00000021948	Prkcd	chr14	-	RI	spermatogonia
1471	ENSMUSG00000006215	Zbtb17	chr4	+	RI	spermatogonia
1472	ENSMUSG00000032085	Tagln	chr9	-	RI	spermatogonia
1473	ENSMUSG00000047767	Atg16l2	chr7	-	RI	spermatogonia
1474	ENSMUSG00000079677	Fdx1l	chr9	-	RI	spermatogonia
1475	ENSMUSG00000054708	Ankrd24	chr10	+	RI	spermatogonia
1476	ENSMUSG00000033106	Slc7a6os	chr8	-	RI	spermatogonia
1477	ENSMUSG00000039768	Dnajc11	chr4	+	RI	spermatogonia
1478	ENSMUSG00000003808	Farsa	chr8	+	RI	spermatogonia
1479	ENSMUSG00000032322	Pstpip1	chr9	+	RI	spermatogonia
1480	ENSMUSG00000031756	Cenpn	chr8	+	RI	spermatogonia
1481	ENSMUSG00000021115	Vrk1	chr12	+	RI	spermatogonia
1482	ENSMUSG00000022577	Ly6h	chr15	-	RI	spermatogonia
1483	ENSMUSG00000015536	Mocs2	chr13	+	RI	spermatogonia
1484	ENSMUSG00000049339	Retreg2	chr1	+	RI	spermatogonia
1485	ENSMUSG00000018565	Elp5	chr11	-	RI	spermatogonia
1486	ENSMUSG00000028969	Cdk5	chr5	-	RI	spermatogonia
1487	ENSMUSG00000025578	Cbx8	chr11	-	RI	spermatogonia
1488	ENSMUSG00000059540	Tcea2	chr2	+	RI	spermatogonia
1489	ENSMUSG00000040687	Madd	chr2	-	RI	spermatogonia
1490	ENSMUSG00000000561	Wdr77	chr3	+	RI	spermatogonia
1491	ENSMUSG00000097075	D830044I16Rik	chr7	-	RI	spermatogonia
1492	ENSMUSG00000054099	Slc25a40	chr5	+	RI	spermatogonia
1493	ENSMUSG00000007880	Arid1a	chr4	-	RI	spermatogonia
1494	ENSMUSG00000020899	Pfas	chr11	-	RI	spermatogonia
1495	ENSMUSG00000066232	Ipo7	chr7	+	RI	spermatogonia
1496	ENSMUSG00000040928	S100pbp	chr4	-	RI	spermatogonia
1497	ENSMUSG00000068206	Pick1	chr15	+	RI	spermatogonia
1498	ENSMUSG00000076437	Selenoh	chr2	-	RI	spermatogonia
1499	ENSMUSG00000029703	Lrwd1	chr5	-	RI	spermatogonia
1500	ENSMUSG00000020831	0610010K14Rik	chr11	-	RI	spermatogonia
1501	ENSMUSG00000032301	Psma4	chr9	+	RI	spermatogonia
1502	ENSMUSG00000031311	Nono	chrX	+	RI	spermatogonia
1503	ENSMUSG00000038895	Zfp653	chr9	-	RI	spermatogonia
1504	ENSMUSG00000040860	Crocc	chr4	-	RI	spermatogonia
1505	ENSMUSG00000000134	Tfe3	chrX	+	RI	spermatogonia
1506	ENSMUSG00000029814	Igf2bp3	chr6	-	RI	spermatogonia
1507	ENSMUSG00000030815	Phkg2	chr7	+	RI	spermatogonia
1508	ENSMUSG00000004667	Polr2e	chr10	-	RI	spermatogonia
1509	ENSMUSG00000032299	Commd4	chr9	-	RI	spermatogonia
1510	ENSMUSG00000026708	Cenpl	chr1	+	RI	spermatogonia
1511	ENSMUSG00000030083	Abtb1	chr6	-	RI	spermatogonia
1512	ENSMUSG00000056536	Pign	chr1	-	RI	spermatogonia
1513	ENSMUSG00000007850	Hnrnph1	chr11	+	RI	spermatogonia
1514	ENSMUSG00000019971	Cep290	chr10	+	RI	spermatogonia
1515	ENSMUSG00000028555	Ttc39a	chr4	+	RI	spermatogonia
1516	ENSMUSG00000023505	Cdca3	chr6	+	RI	spermatogonia
1517	ENSMUSG00000028059	Arhgef2	chr3	+	RI	spermatogonia
1518	ENSMUSG00000060950	Trmt61a	chr12	+	RI	spermatogonia
1519	ENSMUSG00000023452	Pisd	chr5	-	RI	spermatogonia
1520	ENSMUSG00000038884	A230050P20Rik	chr9	+	RI	spermatogonia
1521	ENSMUSG00000033543	Gtf2a2	chr9	+	RI	spermatogonia
1522	ENSMUSG00000045482	Trrap	chr5	+	RI	spermatogonia
1523	ENSMUSG00000028034	Fubp1	chr3	+	RI	spermatogonia
1524	ENSMUSG00000011658	Fuz	chr7	+	RI	spermatogonia
1525	ENSMUSG00000027615	Hps3	chr3	-	RI	spermatogonia
1526	ENSMUSG00000054252	Fgfr3	chr5	+	RI	spermatogonia
1527	ENSMUSG00000086370	Ftx	chrX	-	RI	spermatogonia
1528	ENSMUSG00000068882	Ssb	chr2	+	RI	spermatogonia
1529	ENSMUSG00000010064	Slc38a3	chr9	-	RI	spermatogonia
1530	ENSMUSG00000052926	Rnaseh2a	chr8	-	RI	spermatogonia
1531	ENSMUSG00000027613	Eif6	chr2	-	RI	spermatogonia
1532	ENSMUSG00000020886	Dlg4	chr11	+	RI	spermatogonia
1533	ENSMUSG00000024104	Washc2	chr6	+	RI	spermatogonia
1534	ENSMUSG00000004317	Clcn5	chrX	-	RI	spermatogonia
1535	ENSMUSG00000062729	Ppox	chr1	-	RI	spermatogonia
1536	ENSMUSG00000029503	P2rx2	chr5	-	RI	spermatogonia
1537	ENSMUSG00000078765	U2af1l4	chr7	+	RI	spermatogonia
1538	ENSMUSG00000019792	Trmt11	chr10	-	RI	spermatogonia
1539	ENSMUSG00000032127	Vps11	chr9	-	RI	spermatogonia
1540	ENSMUSG00000021901	Bap1	chr14	+	RI	spermatogonia
1541	ENSMUSG00000040562	Gstm2	chr3	-	RI	spermatogonia
1542	ENSMUSG00000017756	Slc12a7	chr13	+	RI	spermatogonia
1543	ENSMUSG00000032308	Ulk3	chr9	+	RI	spermatogonia
1544	ENSMUSG00000051517	Arhgef39	chr4	-	RI	spermatogonia
1545	ENSMUSG00000004565	Pnpla6	chr8	+	RI	spermatogonia
1546	ENSMUSG00000025747	Tyms	chr5	-	RI	spermatogonia
1547	ENSMUSG00000024410	3110002H16Rik	chr18	+	RI	spermatogonia
1548	ENSMUSG00000055862	Izumo4	chr10	+	RI	spermatogonia
1549	ENSMUSG00000022558	Mroh1	chr15	+	RI	spermatogonia
1550	ENSMUSG00000039886	Tmem120a	chr5	-	RI	spermatogonia
1551	ENSMUSG00000060601	Nr1h2	chr7	-	RI	spermatogonia
1552	ENSMUSG00000005378	Wbscr22	chr5	-	RI	spermatogonia
1553	ENSMUSG00000005882	Uqcc1	chr2	-	RI	spermatogonia
1554	ENSMUSG00000032842	Abcc10	chr17	-	RI	spermatogonia
1555	ENSMUSG00000019907	Ppp1r12a	chr10	+	RI	spermatogonia
1556	ENSMUSG00000069255	Dusp22	chr13	+	RI	spermatogonia
1557	ENSMUSG00000025507	Pidd1	chr7	-	RI	spermatogonia
1558	ENSMUSG00000053693	Mast1	chr8	-	RI	spermatogonia
1559	ENSMUSG00000010097	Nxf1	chr19	+	RI	spermatogonia
1560	ENSMUSG00000028687	Mutyh	chr4	+	RI	spermatogonia
1561	ENSMUSG00000037907	Ankrd13b	chr11	-	RI	spermatogonia
1562	ENSMUSG00000030166	Rad52	chr6	+	RI	spermatogonia
1563	ENSMUSG00000027933	Ints3	chr3	-	RI	spermatogonia
1564	ENSMUSG00000021250	Fos	chr12	+	RI	spermatogonia
1565	ENSMUSG00000004933	Matk	chr10	+	RI	spermatogonia
1566	ENSMUSG00000039623	Ap5z1	chr5	+	RI	spermatogonia
1567	ENSMUSG00000041763	Tpp2	chr1	+	RI	spermatogonia
1568	ENSMUSG00000023707	Ogfod2	chr5	+	RI	spermatogonia
1569	ENSMUSG00000026198	Abcb6	chr1	-	RI	spermatogonia
1570	ENSMUSG00000025647	Shisa5	chr9	+	RI	spermatogonia
1571	ENSMUSG00000016344	Ppdpf	chr2	+	RI	spermatogonia
1572	ENSMUSG00000038886	Man2a2	chr7	-	RI	spermatogonia
1573	ENSMUSG00000010057	Nprl2	chr9	+	RI	spermatogonia
1574	ENSMUSG00000003153	Slc2a3	chr6	-	RI	spermatogonia
1575	ENSMUSG00000053286	Trmt1l	chr1	+	RI	spermatogonia
1576	ENSMUSG00000024975	Pdcd4	chr19	+	RI	spermatogonia
1577	ENSMUSG00000024807	Syvn1	chr19	+	RI	spermatogonia
1578	ENSMUSG00000021773	Comtd1	chr14	-	RI	spermatogonia
1579	ENSMUSG00000026571	Dcaf6	chr1	-	RI	spermatogonia
1580	ENSMUSG00000060036	Rpl3	chr15	-	RI	spermatogonia
1581	ENSMUSG00000033916	Chmp2a	chr7	-	RI	spermatogonia
1582	ENSMUSG00000053754	Chd8	chr14	-	RI	spermatogonia
1583	ENSMUSG00000024026	Glo1	chr17	-	RI	spermatogonia
1584	ENSMUSG00000006289	Osgep	chr14	-	RI	spermatogonia
1585	ENSMUSG00000073702	Rpl31	chr1	+	RI	spermatogonia
1586	ENSMUSG00000027338	Prnd	chr2	+	RI	spermatogonia
1587	ENSMUSG00000027276	Jag1	chr2	-	RI	spermatogonia
1588	ENSMUSG00000021572	Cep72	chr13	-	RI	spermatogonia
1589	ENSMUSG00000024073	Birc6	chr17	+	RI	spermatogonia
1590	ENSMUSG00000020697	Lig3	chr11	+	RI	spermatogonia
1591	ENSMUSG00000007411	Mark3	chr12	+	RI	spermatogonia
1592	ENSMUSG00000004789	Dlst	chr12	+	RI	spermatogonia
1593	ENSMUSG00000008450	Nutf2	chr8	+	RI	spermatogonia
1594	ENSMUSG00000059248	Sept9	chr11	+	RI	spermatogonia
1595	ENSMUSG00000026034	Clk1	chr1	-	RI	spermatogonia
1596	ENSMUSG00000013622	Atraid	chr5	+	RI	spermatogonia
1597	ENSMUSG00000058407	Txndc9	chr1	-	RI	spermatogonia
1598	ENSMUSG00000039307	Hexdc	chr11	+	RI	spermatogonia
1599	ENSMUSG00000059939	9430015G10Rik	chr4	+	RI	spermatogonia
1600	ENSMUSG00000058070	Eml1	chr12	+	RI	spermatogonia
1601	ENSMUSG00000056737	Capg	chr6	+	RI	spermatogonia
1602	ENSMUSG00000029389	Ddx55	chr5	+	RI	spermatogonia
1603	ENSMUSG00000003199	Mpnd	chr17	+	RI	spermatogonia
1604	ENSMUSG00000030870	Ubfd1	chr7	+	RI	spermatogonia
1605	ENSMUSG00000037475	Thoc2	chrX	-	RI	spermatogonia
1606	ENSMUSG00000028107	Tars2	chr3	-	RI	spermatogonia
1607	ENSMUSG00000026987	Baz2b	chr2	-	RI	spermatogonia
1608	ENSMUSG00000021240	Abcd4	chr12	-	RI	spermatogonia
1609	ENSMUSG00000040359	Ufl1	chr4	-	RI	spermatogonia
1610	ENSMUSG00000025995	Wdr75	chr1	+	RI	spermatogonia
1611	ENSMUSG00000011832	Evi5l	chr8	+	RI	spermatogonia
1612	ENSMUSG00000036620	Mgat4b	chr11	+	RI	spermatogonia
1613	ENSMUSG00000015291	Gdi1	chrX	+	RI	spermatogonia
1614	ENSMUSG00000027404	Snrpb	chr2	-	RI	spermatogonia
1615	ENSMUSG00000032399	Rpl4	chr9	+	RI	spermatogonia
1616	ENSMUSG00000031796	Cfap20	chr8	-	RI	spermatogonia
1617	ENSMUSG00000003038	Hmgn2	chr4	-	RI	spermatogonia
1618	ENSMUSG00000032827	Ppp1r9a	chr6	+	RI	spermatogonia
1619	ENSMUSG00000001034	Mapk7	chr11	-	RI	spermatogonia
1620	ENSMUSG00000028461	Ccdc107	chr4	+	RI	spermatogonia
1621	ENSMUSG00000002043	Trappc6a	chr7	+	RI	spermatogonia
1622	ENSMUSG00000027349	Fam98b	chr2	+	RI	spermatogonia
1623	ENSMUSG00000027674	Pex5l	chr3	-	RI	spermatogonia
1624	ENSMUSG00000029433	Diablo	chr5	-	RI	spermatogonia
1625	ENSMUSG00000028041	Adam15	chr3	-	RI	spermatogonia
1626	ENSMUSG00000033961	Zfp446	chr7	+	RI	spermatogonia
1627	ENSMUSG00000007097	Atp1a2	chr1	-	RI	spermatogonia
1628	ENSMUSG00000022843	Clcn2	chr16	-	RI	spermatogonia
1629	ENSMUSG00000037761	Actr5	chr2	+	RI	spermatogonia
1630	ENSMUSG00000028104	Polr3gl	chr3	-	RI	spermatogonia
1631	ENSMUSG00000027829	Ccnl1	chr3	-	RI	spermatogonia
1632	ENSMUSG00000021134	Srsf5	chr12	+	RI	spermatogonia
1633	ENSMUSG00000021866	Anxa11	chr14	+	RI	spermatogonia
1634	ENSMUSG00000003099	Ppp5c	chr7	-	RI	spermatogonia
1635	ENSMUSG00000038780	Smurf1	chr5	-	RI	spermatogonia
1636	ENSMUSG00000032316	Clk3	chr9	-	RI	spermatogonia
1637	ENSMUSG00000024220	Zfp523	chr17	+	RI	spermatogonia
1638	ENSMUSG00000037447	Arid5a	chr1	+	RI	spermatogonia
1639	ENSMUSG00000024188	Luc7l	chr17	+	RI	spermatogonia
1640	ENSMUSG00000031864	Ints10	chr8	+	RI	spermatogonia
1641	ENSMUSG00000038828	Tmem214	chr5	+	RI	spermatogonia
1642	ENSMUSG00000041477	Dcp1b	chr6	+	RI	spermatogonia
1643	ENSMUSG00000034211	Mrps17	chr5	+	RI	spermatogonia
1644	ENSMUSG00000029283	Cdc7	chr5	+	RI	spermatogonia
1645	ENSMUSG00000032295	Man2c1	chr9	+	RI	spermatogonia
1646	ENSMUSG00000035842	Ddx11	chr17	+	RI	spermatogonia
1647	ENSMUSG00000031167	Rbm3	chrX	-	RI	spermatogonia
1648	ENSMUSG00000034248	Slc25a37	chr14	-	RI	spermatogonia
1649	ENSMUSG00000033918	Parl	chr16	-	RI	spermatogonia
1650	ENSMUSG00000066621	Tecpr1	chr5	-	RI	spermatogonia
1651	ENSMUSG00000034807	Colgalt1	chr8	+	RI	spermatogonia
1652	ENSMUSG00000036810	Cnep1r1	chr8	+	RI	spermatogonia
1653	ENSMUSG00000029034	Ints11	chr4	+	RI	spermatogonia
1654	ENSMUSG00000020818	Mfsd11	chr11	+	RI	spermatogonia
1655	ENSMUSG00000031787	Katnb1	chr8	+	RI	spermatogonia
1656	ENSMUSG00000073838	Tufm	chr7	+	RI	spermatogonia
1657	ENSMUSG00000059183	Mtfmt	chr9	+	RI	spermatogonia
1658	ENSMUSG00000023977	Ubr2	chr17	-	RI	spermatogonia
1659	ENSMUSG00000041774	Ydjc	chr16	+	RI	spermatogonia
1660	ENSMUSG00000014504	Srp19	chr18	+	RI	spermatogonia
1661	ENSMUSG00000024792	Zfpl1	chr19	-	RI	spermatogonia
1662	ENSMUSG00000027710	Acad9	chr3	+	RI	spermatogonia
1663	ENSMUSG00000028180	Zranb2	chr3	+	RI	spermatogonia
1664	ENSMUSG00000001082	Mfsd10	chr5	-	RI	spermatogonia
1665	ENSMUSG00000068917	Clk2	chr3	+	RI	spermatogonia
1666	ENSMUSG00000026944	Abca2	chr2	+	RI	spermatogonia
1667	ENSMUSG00000021546	Hnrnpk	chr13	-	RI	spermatogonia
1668	ENSMUSG00000025792	Slc25a10	chr11	+	RI	spermatogonia
1669	ENSMUSG00000023944	Hsp90ab1	chr17	-	RI	spermatogonia
1670	ENSMUSG00000034121	Mks1	chr11	+	RI	spermatogonia
1671	ENSMUSG00000001416	Cct3	chr3	+	RI	spermatogonia
1672	ENSMUSG00000026721	Rabgap1l	chr1	-	RI	spermatogonia
1673	ENSMUSG00000000148	Brat1	chr5	+	RI	spermatogonia
1674	ENSMUSG00000052609	Plekhg3	chr12	+	RI	spermatogonia
1675	ENSMUSG00000039041	Adrm1	chr2	+	RI	spermatogonia
1676	ENSMUSG00000013593	Ndufs2	chr1	-	RI	spermatogonia
1677	ENSMUSG00000022550	Adck5	chr15	+	RI	spermatogonia
1678	ENSMUSG00000066456	Hmgn3	chr9	-	RI	spermatogonia
1679	ENSMUSG00000038683	Pak1ip1	chr13	+	RI	spermatogonia
1680	ENSMUSG00000034949	Zfr2	chr10	+	RI	spermatogonia
1681	ENSMUSG00000001248	Gramd1a	chr7	-	RI	spermatogonia
1682	ENSMUSG00000025151	Maged1	chrX	-	RI	spermatogonia
1683	ENSMUSG00000024118	1600002H07Rik	chr17	-	RI	spermatogonia
1684	ENSMUSG00000038344	Txlng	chrX	-	RI	spermatogonia
1685	ENSMUSG00000031858	Mau2	chr8	-	RI	spermatogonia
1686	ENSMUSG00000029022	Miip	chr4	-	RI	spermatogonia
1687	ENSMUSG00000006058	Snf8	chr11	+	RI	spermatogonia
1688	ENSMUSG00000037971	1110032A03Rik	chr9	-	RI	spermatogonia
1689	ENSMUSG00000025142	Aspscr1	chr11	+	RI	spermatogonia
1690	ENSMUSG00000020092	Pald1	chr10	-	RI	spermatogonia
1691	ENSMUSG00000026883	Dab2ip	chr2	+	RI	spermatogonia
1692	ENSMUSG00000042502	Cd2bp2	chr7	-	RI	spermatogonia
1693	ENSMUSG00000025268	Maged2	chrX	-	RI	spermatogonia
1694	ENSMUSG00000006344	Ggt5	chr10	+	RI	spermatogonia
1695	ENSMUSG00000070493	Chchd2	chr5	-	RI	spermatogonia
1696	ENSMUSG00000000759	Tubgcp3	chr8	-	RI	spermatogonia
1697	ENSMUSG00000042810	Krba1	chr6	+	RI	spermatogonia
1698	ENSMUSG00000079487	Med12	chrX	+	RI	spermatogonia
1699	ENSMUSG00000006676	Usp19	chr9	+	RI	spermatogonia
1700	ENSMUSG00000054079	Utp18	chr11	-	RI	spermatogonia
1701	ENSMUSG00000042699	Dhx9	chr1	-	RI	spermatogonia
1702	ENSMUSG00000002250	Ppard	chr17	+	RI	spermatogonia
1703	ENSMUSG00000064289	Tank	chr2	+	RI	spermatogonia
1704	ENSMUSG00000071646	Mta2	chr19	+	RI	spermatogonia
1705	ENSMUSG00000002949	Timm44	chr8	-	RI	spermatogonia
1706	ENSMUSG00000031065	Cdk16	chrX	+	RI	spermatogonia
1707	ENSMUSG00000074797	Itpa	chr2	+	RI	spermatogonia
1708	ENSMUSG00000038102	Trappc11	chr8	-	RI	spermatogonia
1709	ENSMUSG00000070003	Ssbp4	chr8	-	RI	spermatogonia
1710	ENSMUSG00000035772	Mrps2	chr2	+	RI	spermatogonia
1711	ENSMUSG00000021037	Ahsa1	chr12	+	RI	spermatogonia
1712	ENSMUSG00000057421	Las1l	chrX	-	RI	spermatogonia
1713	ENSMUSG00000032103	Pus3	chr9	+	RI	spermatogonia
1714	ENSMUSG00000037845	Fdxacb1	chr9	+	RI	spermatogonia
1715	ENSMUSG00000022580	Rhpn1	chr15	+	RI	spermatogonia
1716	ENSMUSG00000028809	Srrm1	chr4	-	RI	spermatogonia
1717	ENSMUSG00000075702	Selenom	chr11	+	RI	spermatogonia
1718	ENSMUSG00000026277	Stk25	chr1	-	RI	spermatogonia
1719	ENSMUSG00000039187	Fanci	chr7	+	RI	spermatogonia
1720	ENSMUSG00000008398	Elk3	chr10	-	RI	spermatogonia
1721	ENSMUSG00000025207	Sema4g	chr19	+	RI	spermatogonia
1722	ENSMUSG00000032604	Qars	chr9	+	RI	spermatogonia
1723	ENSMUSG00000028608	0610037L13Rik	chr4	+	RI	spermatogonia
1724	ENSMUSG00000062647	Rpl7a	chr2	+	RI	spermatogonia
1725	ENSMUSG00000028923	Necap2	chr4	-	RI	spermatogonia
1726	ENSMUSG00000101174	Hoxd4	chr2	+	RI	spermatogonia
1727	ENSMUSG00000027423	Snx5	chr2	-	RI	spermatogonia
1728	ENSMUSG00000027937	Jtb	chr3	+	RI	spermatogonia
1729	ENSMUSG00000073725	Lmbrd1	chr1	+	RI	spermatogonia
1730	ENSMUSG00000019320	Noxo1	chr17	+	RI	spermatogonia
1731	ENSMUSG00000028821	Syf2	chr4	+	RI	spermatogonia
1732	ENSMUSG00000037174	Elf2	chr3	-	RI	spermatogonia
1733	ENSMUSG00000048612	Myof	chr19	-	RI	spermatogonia
1734	ENSMUSG00000020782	Llgl2	chr11	+	RI	spermatogonia
1735	ENSMUSG00000009995	Taz	chrX	+	RI	spermatogonia
1736	ENSMUSG00000029502	Golga3	chr5	+	RI	spermatogonia
1737	ENSMUSG00000024019	Cmtr1	chr17	+	RI	spermatogonia
1738	ENSMUSG00000020719	Ddx5	chr11	-	RI	spermatogonia
1739	ENSMUSG00000038095	Sbno1	chr5	-	RI	spermatogonia
1740	ENSMUSG00000015790	Surf1	chr2	-	RI	spermatogonia
1741	ENSMUSG00000051768	Xrcc1	chr7	+	RI	spermatogonia
1742	ENSMUSG00000022562	Oplah	chr15	-	RI	spermatogonia
1743	ENSMUSG00000036550	Cnot1	chr8	-	RI	spermatogonia
1744	ENSMUSG00000028949	Smarcd3	chr5	-	RI	spermatogonia
1745	ENSMUSG00000025915	Sgk3	chr1	+	RI	spermatogonia
1746	ENSMUSG00000019927	Ube2d1	chr10	-	RI	spermatogonia
1747	ENSMUSG00000075376	Rc3h2	chr2	-	RI	spermatogonia
1748	ENSMUSG00000021957	Tkt	chr14	+	RI	spermatogonia
1749	ENSMUSG00000038502	Ptov1	chr7	-	RI	spermatogonia
1750	ENSMUSG00000047534	Mis18bp1	chr12	-	RI	spermatogonia
1751	ENSMUSG00000078350	Smim1	chr4	-	RI	spermatogonia
1752	ENSMUSG00000039157	Fam102a	chr2	+	RI	spermatogonia
1753	ENSMUSG00000029014	Dnajc2	chr5	-	RI	spermatogonia
1754	ENSMUSG00000001017	Chtop	chr3	-	RI	spermatogonia
1755	ENSMUSG00000022075	Rhobtb2	chr14	-	RI	spermatogonia
1756	ENSMUSG00000058569	Tmed9	chr13	+	RI	spermatogonia
1757	ENSMUSG00000029647	Pan3	chr5	+	RI	spermatogonia
1758	ENSMUSG00000026193	Fn1	chr1	-	RI	spermatogonia
1759	ENSMUSG00000030720	Cln3	chr7	-	RI	spermatogonia
1760	ENSMUSG00000041939	Mvk	chr5	+	RI	spermatogonia
1761	ENSMUSG00000038011	Dnah10	chr5	+	RI	spermatogonia
1762	ENSMUSG00000056167	Cnot10	chr9	-	RI	spermatogonia
1763	ENSMUSG00000038708	Golga4	chr9	+	SE	spermatogonia
1764	ENSMUSG00000060275	Nrg2	chr18	-	SE	spermatogonia
1765	ENSMUSG00000052934	Fbxo31	chr8	-	SE	spermatogonia
1766	ENSMUSG00000025144	Cenpx	chr11	-	SE	spermatogonia
1767	ENSMUSG00000002372	Ranbp3	chr17	+	SE	spermatogonia
1768	ENSMUSG00000048416	Mlf1	chr3	+	SE	spermatogonia
1769	ENSMUSG00000021277	Traf3	chr12	+	SE	spermatogonia
1770	ENSMUSG00000030795	Fus	chr7	+	SE	spermatogonia
1771	ENSMUSG00000036138	Acaa1a	chr9	+	SE	spermatogonia
1772	ENSMUSG00000027665	Pik3ca	chr3	+	SE	spermatogonia
1773	ENSMUSG00000110803	AC156795.1	chr9	-	SE	spermatogonia
1774	ENSMUSG00000025007	Aldh18a1	chr19	-	SE	spermatogonia
1775	ENSMUSG00000042079	Hnrnpf	chr6	+	SE	spermatogonia
1776	ENSMUSG00000038914	Dido1	chr2	-	SE	spermatogonia
1777	ENSMUSG00000002020	Ltbp2	chr12	-	SE	spermatogonia
1778	ENSMUSG00000022092	Ppp3cc	chr14	-	SE	spermatogonia
1779	ENSMUSG00000034187	Nsf	chr11	-	SE	spermatogonia
1780	ENSMUSG00000027445	Cst9	chr2	+	SE	spermatogonia
1781	ENSMUSG00000029470	P2rx4	chr5	+	SE	spermatogonia
1782	ENSMUSG00000057469	E2f6	chr12	+	SE	spermatogonia
1783	ENSMUSG00000022884	Eif4a2	chr16	+	SE	spermatogonia
1784	ENSMUSG00000041890	Git2	chr5	-	SE	spermatogonia
1785	ENSMUSG00000063445	Nmral1	chr16	-	SE	spermatogonia
1786	ENSMUSG00000032580	Rbm5	chr9	-	SE	spermatogonia
1787	ENSMUSG00000044134	Fam109a	chr5	+	SE	spermatogonia
1788	ENSMUSG00000034621	Gpatch8	chr11	-	SE	spermatogonia
1789	ENSMUSG00000006288	Ttc5	chr14	-	SE	spermatogonia
1790	ENSMUSG00000026648	Dclre1c	chr2	+	SE	spermatogonia
1791	ENSMUSG00000036529	Sbf1	chr15	-	SE	spermatogonia
1792	ENSMUSG00000014856	Tmem208	chr8	+	SE	spermatogonia
1793	ENSMUSG00000037519	Ppfia1	chr7	-	SE	spermatogonia
1794	ENSMUSG00000022020	Naa16	chr14	-	SE	spermatogonia
1795	ENSMUSG00000066568	Lsm14a	chr7	-	SE	spermatogonia
1796	ENSMUSG00000043940	Wdfy3	chr5	-	SE	spermatogonia
1797	ENSMUSG00000026782	Abi2	chr1	+	SE	spermatogonia
1798	ENSMUSG00000018412	Kansl1	chr11	-	SE	spermatogonia
1799	ENSMUSG00000031511	Arhgef7	chr8	+	SE	spermatogonia
1800	ENSMUSG00000039953	Clstn1	chr4	+	SE	spermatogonia
1801	ENSMUSG00000020521	Rnft1	chr11	+	SE	spermatogonia
1802	ENSMUSG00000020740	Gga3	chr11	-	SE	spermatogonia
1803	ENSMUSG00000032307	Ube2q2	chr9	+	SE	spermatogonia
1804	ENSMUSG00000024989	Cep55	chr19	+	SE	spermatogonia
1805	ENSMUSG00000040599	Mis12	chr11	+	SE	spermatogonia
1806	ENSMUSG00000028161	Ppp3ca	chr3	+	SE	spermatogonia
1807	ENSMUSG00000070733	Fryl	chr5	-	SE	spermatogonia
1808	ENSMUSG00000032366	Tpm1	chr9	-	SE	spermatogonia
1809	ENSMUSG00000079179	Rab10os	chr12	+	SE	spermatogonia
1810	ENSMUSG00000069049	Eif2s3y	chrY	+	SE	spermatogonia
1811	ENSMUSG00000005481	Ddx39	chr8	+	SE	spermatogonia
1812	ENSMUSG00000037151	Lrrc20	chr10	+	SE	spermatogonia
1813	ENSMUSG00000026843	Fubp3	chr2	+	SE	spermatogonia
1814	ENSMUSG00000022515	Anks3	chr16	-	SE	spermatogonia
1815	ENSMUSG00000021794	Glud1	chr14	+	SE	spermatogonia
1816	ENSMUSG00000024982	Zdhhc6	chr19	-	SE	spermatogonia
1817	ENSMUSG00000019854	Reps1	chr10	+	SE	spermatogonia
1818	ENSMUSG00000031174	Rpgr	chrX	-	SE	spermatogonia
1819	ENSMUSG00000031488	Rab11fip1	chr8	-	SE	spermatogonia
1820	ENSMUSG00000038685	Rtel1	chr2	+	SE	spermatogonia
1821	ENSMUSG00000052707	Tnrc6a	chr7	+	SE	spermatogonia
1822	ENSMUSG00000039254	Pomt1	chr2	+	SE	spermatogonia
1823	ENSMUSG00000021495	Fam193b	chr13	-	SE	spermatogonia
1824	ENSMUSG00000035310	Lin54	chr5	-	SE	spermatogonia
1825	ENSMUSG00000002608	Ccdc97	chr7	-	SE	spermatogonia
1826	ENSMUSG00000055235	Wdr86	chr5	-	SE	spermatogonia
1827	ENSMUSG00000058979	Hdhd5	chr6	-	SE	spermatogonia
1828	ENSMUSG00000020721	Helz	chr11	+	SE	spermatogonia
1829	ENSMUSG00000002881	Nab1	chr1	-	SE	spermatogonia
1830	ENSMUSG00000024127	Prepl	chr17	-	SE	spermatogonia
1831	ENSMUSG00000014932	Yes1	chr5	+	SE	spermatogonia
1832	ENSMUSG00000059277	R74862	chr7	-	SE	spermatogonia
1833	ENSMUSG00000041536	Serpina3a	chr12	+	SE	spermatogonia
1834	ENSMUSG00000038677	Scube3	chr17	+	SE	spermatogonia
1835	ENSMUSG00000114470	AC175538.2	chr13	-	SE	spermatogonia
1836	ENSMUSG00000026489	Coq8a	chr1	-	SE	spermatogonia
1837	ENSMUSG00000079557	March2	chr17	-	SE	spermatogonia
1838	ENSMUSG00000026049	Tex30	chr1	-	SE	spermatogonia
1839	ENSMUSG00000041817	Fam169a	chr13	+	SE	spermatogonia
1840	ENSMUSG00000021759	Plpp1	chr13	+	SE	spermatogonia
1841	ENSMUSG00000052949	Rnf157	chr11	-	SE	spermatogonia
1842	ENSMUSG00000019763	Rmnd1	chr10	-	SE	spermatogonia
1843	ENSMUSG00000009733	Tfcp2	chr15	-	SE	spermatogonia
1844	ENSMUSG00000009535	Rnmt	chr18	+	SE	spermatogonia
1845	ENSMUSG00000021868	Ppif	chr14	+	SE	spermatogonia
1846	ENSMUSG00000029804	Herc3	chr6	+	SE	spermatogonia
1847	ENSMUSG00000053617	Sh3pxd2a	chr19	-	SE	spermatogonia
1848	ENSMUSG00000090626	Tex9	chr9	-	SE	spermatogonia
1849	ENSMUSG00000048126	Col6a3	chr1	-	SE	spermatogonia
1850	ENSMUSG00000026238	Ptma	chr1	+	SE	spermatogonia
1851	ENSMUSG00000021224	Numb	chr12	-	SE	spermatogonia
1852	ENSMUSG00000042557	Sin3a	chr9	+	SE	spermatogonia
1853	ENSMUSG00000042354	Gnl3	chr14	-	SE	spermatogonia
1854	ENSMUSG00000038696	Mapkap1	chr2	+	SE	spermatogonia
1855	ENSMUSG00000025825	Iscu	chr5	+	SE	spermatogonia
1856	ENSMUSG00000022214	Dcaf11	chr14	+	SE	spermatogonia
1857	ENSMUSG00000030779	Rbbp6	chr7	+	SE	spermatogonia
1858	ENSMUSG00000069855	Slc47a2	chr11	-	SE	spermatogonia
1859	ENSMUSG00000015869	Prpsap1	chr11	-	SE	spermatogonia
1860	ENSMUSG00000029414	Kntc1	chr5	+	SE	spermatogonia
1861	ENSMUSG00000028277	Ube2j1	chr4	+	SE	spermatogonia
1862	ENSMUSG00000008976	Gabpa	chr16	+	SE	spermatogonia
1863	ENSMUSG00000037791	Phf12	chr11	+	SE	spermatogonia
1864	ENSMUSG00000035992	Fnip1	chr11	+	SE	spermatogonia
1865	ENSMUSG00000030609	Aen	chr7	+	SE	spermatogonia
1866	ENSMUSG00000085396	Firre	chrX	-	SE	spermatogonia
1867	ENSMUSG00000032305	Fam219b	chr9	+	SE	spermatogonia
1868	ENSMUSG00000044709	Gemin7	chr7	-	SE	spermatogonia
1869	ENSMUSG00000022771	Ppil2	chr16	-	SE	spermatogonia
1870	ENSMUSG00000035248	Zcchc6	chr13	-	SE	spermatogonia
1871	ENSMUSG00000020589	Fam49a	chr12	+	SE	spermatogonia
1872	ENSMUSG00000022601	Zbtb11	chr16	+	SE	spermatogonia
1873	ENSMUSG00000029422	Rsrc2	chr5	-	SE	spermatogonia
1874	ENSMUSG00000020198	Ap3d1	chr10	-	SE	spermatogonia
1875	ENSMUSG00000022779	Top3b	chr16	+	SE	spermatogonia
1876	ENSMUSG00000045409	Trim39	chr17	-	SE	spermatogonia
1877	ENSMUSG00000045095	Magi1	chr6	-	SE	spermatogonia
1878	ENSMUSG00000037210	Fam193a	chr5	+	SE	spermatogonia
1879	ENSMUSG00000031422	Morf4l2	chrX	-	SE	spermatogonia
1880	ENSMUSG00000047126	Cltc	chr11	-	SE	spermatogonia
1881	ENSMUSG00000028476	Reck	chr4	+	SE	spermatogonia
1882	ENSMUSG00000030067	Foxp1	chr6	-	SE	spermatogonia
1883	ENSMUSG00000063889	Crem	chr18	-	SE	spermatogonia
1884	ENSMUSG00000018347	Zkscan6	chr11	+	SE	spermatogonia
1885	ENSMUSG00000020716	Nf1	chr11	+	SE	spermatogonia
1886	ENSMUSG00000004500	Zfp324	chr7	+	SE	spermatogonia
1887	ENSMUSG00000071176	Arhgef10	chr8	+	SE	spermatogonia
1888	ENSMUSG00000040596	Pogk	chr1	-	SE	spermatogonia
1889	ENSMUSG00000078515	Ddi2	chr4	-	SE	spermatogonia
1890	ENSMUSG00000035139	Secisbp2	chr13	+	SE	spermatogonia
1891	ENSMUSG00000038010	Ccdc138	chr10	+	SE	spermatogonia
1892	ENSMUSG00000052299	Ltn1	chr16	-	SE	spermatogonia
1893	ENSMUSG00000022305	Lrp12	chr15	-	SE	spermatogonia
1894	ENSMUSG00000032381	Fam96a	chr9	+	SE	spermatogonia
1895	ENSMUSG00000031537	Ikbkb	chr8	-	SE	spermatogonia
1896	ENSMUSG00000027883	Gpsm2	chr3	-	SE	spermatogonia
1897	ENSMUSG00000019189	Rnf145	chr11	+	SE	spermatogonia
1898	ENSMUSG00000021635	Rad17	chr13	-	SE	spermatogonia
1899	ENSMUSG00000041921	Metap1d	chr2	+	SE	spermatogonia
1900	ENSMUSG00000038637	Lrrc56	chr7	+	SE	spermatogonia
1901	ENSMUSG00000021007	Spata7	chr12	+	SE	spermatogonia
1902	ENSMUSG00000033257	Ttll4	chr1	+	SE	spermatogonia
1903	ENSMUSG00000025357	Dgka	chr10	-	SE	spermatogonia
1904	ENSMUSG00000020527	Myo19	chr11	+	SE	spermatogonia
1905	ENSMUSG00000045983	Eif4g1	chr16	+	SE	spermatogonia
1906	ENSMUSG00000021144	Mta1	chr12	+	SE	spermatogonia
1907	ENSMUSG00000036644	Tbc1d9b	chr11	+	SE	spermatogonia
1908	ENSMUSG00000000296	Tpd52l1	chr10	-	SE	spermatogonia
1909	ENSMUSG00000005610	Eif4g2	chr7	-	SE	spermatogonia
1910	ENSMUSG00000038866	Zcchc2	chr1	+	SE	spermatogonia
1911	ENSMUSG00000061887	Ssbp3	chr4	+	SE	spermatogonia
1912	ENSMUSG00000043241	Upf2	chr2	+	SE	spermatogonia
1913	ENSMUSG00000040434	Large2	chr2	-	SE	spermatogonia
1914	ENSMUSG00000036672	Cenpt	chr8	-	SE	spermatogonia
1915	ENSMUSG00000021990	Spata13	chr14	+	SE	spermatogonia
1916	ENSMUSG00000000365	Rnf17	chr14	+	SE	spermatogonia
1917	ENSMUSG00000053110	Yap1	chr9	-	SE	spermatogonia
1918	ENSMUSG00000025871	4833439L19Rik	chr13	-	SE	spermatogonia
1919	ENSMUSG00000037847	Nmrk1	chr19	+	SE	spermatogonia
1920	ENSMUSG00000029657	Hsph1	chr5	-	SE	spermatogonia
1921	ENSMUSG00000066829	Zfp810	chr9	-	SE	spermatogonia
1922	ENSMUSG00000021027	Ralgapa1	chr12	-	SE	spermatogonia
1923	ENSMUSG00000039738	Slx4	chr16	-	SE	spermatogonia
1924	ENSMUSG00000045659	Plekha7	chr7	-	SE	spermatogonia
1925	ENSMUSG00000073147	5031425E22Rik	chr5	-	SE	spermatogonia
1926	ENSMUSG00000022553	Maf1	chr15	+	SE	spermatogonia
1927	ENSMUSG00000001576	Ergic1	chr17	+	SE	spermatogonia
1928	ENSMUSG00000048537	Phldb1	chr9	-	SE	spermatogonia
1929	ENSMUSG00000062627	Mysm1	chr4	-	SE	spermatogonia
1930	ENSMUSG00000021782	Dlg5	chr14	-	SE	spermatogonia
1931	ENSMUSG00000026565	Pou2f1	chr1	-	SE	spermatogonia
1932	ENSMUSG00000041696	Rasl12	chr9	+	SE	spermatogonia
1933	ENSMUSG00000039959	Hip1	chr5	-	SE	spermatogonia
1934	ENSMUSG00000035126	Wdr78	chr4	-	SE	spermatogonia
1935	ENSMUSG00000026457	Adipor1	chr1	+	SE	spermatogonia
1936	ENSMUSG00000003762	Coq8b	chr7	+	SE	spermatogonia
1937	ENSMUSG00000023021	Cers5	chr15	-	SE	spermatogonia
1938	ENSMUSG00000035236	Scai	chr2	-	SE	spermatogonia
1939	ENSMUSG00000024132	Eci1	chr17	+	SE	spermatogonia
1940	ENSMUSG00000056268	Dennd1b	chr1	+	SE	spermatogonia
1941	ENSMUSG00000053279	Aldh1a1	chr19	+	SE	spermatogonia
1942	ENSMUSG00000023074	Mospd1	chrX	-	SE	spermatogonia
1943	ENSMUSG00000030061	Uba3	chr6	-	SE	spermatogonia
1944	ENSMUSG00000029916	Agk	chr6	+	SE	spermatogonia
1945	ENSMUSG00000058402	Zfp420	chr7	+	SE	spermatogonia
1946	ENSMUSG00000027936	Crtc2	chr3	+	SE	spermatogonia
1947	ENSMUSG00000027534	Snx16	chr3	-	SE	spermatogonia
1948	ENSMUSG00000012123	Crybg2	chr4	+	SE	spermatogonia
1949	ENSMUSG00000021140	Pcnx	chr12	+	SE	spermatogonia
1950	ENSMUSG00000025332	Kdm5c	chrX	+	SE	spermatogonia
1951	ENSMUSG00000036712	Cyld	chr8	+	SE	spermatogonia
1952	ENSMUSG00000020898	Ctc1	chr11	+	SE	spermatogonia
1953	ENSMUSG00000055296	Tmem245	chr4	-	SE	spermatogonia
1954	ENSMUSG00000054008	Ndst1	chr18	-	SE	spermatogonia
1955	ENSMUSG00000037876	Jmjd1c	chr10	+	SE	spermatogonia
1956	ENSMUSG00000037960	Card19	chr13	-	SE	spermatogonia
1957	ENSMUSG00000032855	Pkd1	chr17	+	SE	spermatogonia
1958	ENSMUSG00000033697	Arhgap39	chr15	-	SE	spermatogonia
1959	ENSMUSG00000038371	Sbf2	chr7	-	SE	spermatogonia
1960	ENSMUSG00000022095	Fam160b2	chr14	-	SE	spermatogonia
1961	ENSMUSG00000020812	1810032O08Rik	chr11	+	SE	spermatogonia
1962	ENSMUSG00000040760	Appl1	chr14	-	SE	spermatogonia
1963	ENSMUSG00000029913	Prdm5	chr6	+	SE	spermatogonia
1964	ENSMUSG00000032826	Ank2	chr3	-	SE	spermatogonia
1965	ENSMUSG00000040481	Bptf	chr11	-	SE	spermatogonia
1966	ENSMUSG00000004319	Clcn3	chr8	-	SE	spermatogonia
1967	ENSMUSG00000031486	Adgra2	chr8	+	SE	spermatogonia
1968	ENSMUSG00000025495	Ptdss2	chr7	+	SE	spermatogonia
1969	ENSMUSG00000039804	Ncoa5	chr2	-	SE	spermatogonia
1970	ENSMUSG00000033713	Foxn3	chr12	-	SE	spermatogonia
1971	ENSMUSG00000030990	Pgap2	chr7	+	SE	spermatogonia
1972	ENSMUSG00000067369	Trmt2b	chrX	-	SE	spermatogonia
1973	ENSMUSG00000035901	Dennd5a	chr7	-	SE	spermatogonia
1974	ENSMUSG00000024603	Dctn4	chr18	+	SE	spermatogonia
1975	ENSMUSG00000019261	Map1s	chr8	+	SE	spermatogonia
1976	ENSMUSG00000031939	Taf1d	chr9	+	SE	spermatogonia
1977	ENSMUSG00000035621	Midn	chr10	+	SE	spermatogonia
1978	ENSMUSG00000040263	Klhdc4	chr8	-	SE	spermatogonia
1979	ENSMUSG00000041815	Poldip3	chr15	-	SE	spermatogonia
1980	ENSMUSG00000039382	Wdr45	chrX	+	SE	spermatogonia
1981	ENSMUSG00000033671	Cep350	chr1	-	SE	spermatogonia
1982	ENSMUSG00000011831	Evi5	chr5	-	SE	spermatogonia
1983	ENSMUSG00000029179	Zcchc4	chr5	+	SE	spermatogonia
1984	ENSMUSG00000022770	Dlg1	chr16	+	SE	spermatogonia
1985	ENSMUSG00000063849	Ppcdc	chr9	-	SE	spermatogonia
1986	ENSMUSG00000086040	Wipf3	chr6	+	SE	spermatogonia
1987	ENSMUSG00000029438	Bcl7a	chr5	+	SE	spermatogonia
1988	ENSMUSG00000031255	Sytl4	chrX	-	SE	spermatogonia
1989	ENSMUSG00000021692	Dimt1	chr13	+	SE	spermatogonia
1990	ENSMUSG00000071172	Srsf3	chr17	+	SE	spermatogonia
1991	ENSMUSG00000006728	Cdk4	chr10	+	SE	spermatogonia
1992	ENSMUSG00000028211	Trp53inp1	chr4	+	SE	spermatogonia
1993	ENSMUSG00000028931	Kcnab2	chr4	-	SE	spermatogonia
1994	ENSMUSG00000026490	Cdc42bpa	chr1	+	SE	spermatogonia
1995	ENSMUSG00000029534	St7	chr6	+	SE	spermatogonia
1996	ENSMUSG00000001755	Coasy	chr11	+	SE	spermatogonia
1997	ENSMUSG00000048796	Cyb561d1	chr3	-	SE	spermatogonia
1998	ENSMUSG00000028842	Ago3	chr4	-	SE	spermatogonia
[truncated: 1,610 more rows]

## Sheet: Spermatocyte
ID	GeneID	geneSymbol	chr	strand	Alternative splicing type	Development stage
0	ENSMUSG00000028464	Tpm2	chr4	-	A3SS	Spermatocyte
1	ENSMUSG00000025144	Cenpx	chr11	-	A3SS	Spermatocyte
2	ENSMUSG00000022838	Eaf2	chr16	-	A3SS	Spermatocyte
3	ENSMUSG00000066026	Dhrs3	chr4	+	A3SS	Spermatocyte
4	ENSMUSG00000020196	Cabin1	chr10	-	A3SS	Spermatocyte
5	ENSMUSG00000079334	Nat6	chr9	+	A3SS	Spermatocyte
6	ENSMUSG00000020486	Sept4	chr11	+	A3SS	Spermatocyte
7	ENSMUSG00000022884	Eif4a2	chr16	+	A3SS	Spermatocyte
8	ENSMUSG00000032580	Rbm5	chr9	-	A3SS	Spermatocyte
9	ENSMUSG00000028741	Mrto4	chr4	-	A3SS	Spermatocyte
10	ENSMUSG00000027206	Cops2	chr2	-	A3SS	Spermatocyte
11	ENSMUSG00000026159	Agfg1	chr1	+	A3SS	Spermatocyte
12	ENSMUSG00000070733	Fryl	chr5	-	A3SS	Spermatocyte
13	ENSMUSG00000032366	Tpm1	chr9	-	A3SS	Spermatocyte
14	ENSMUSG00000033382	Trappc8	chr18	-	A3SS	Spermatocyte
15	ENSMUSG00000033365	Ipo13	chr4	-	A3SS	Spermatocyte
16	ENSMUSG00000053877	Srcap	chr7	+	A3SS	Spermatocyte
17	ENSMUSG00000033060	Lmo7	chr14	+	A3SS	Spermatocyte
18	ENSMUSG00000029505	Ep400	chr5	-	A3SS	Spermatocyte
19	ENSMUSG00000058291	Zfp68	chr5	-	A3SS	Spermatocyte
20	ENSMUSG00000041459	Tardbp	chr4	-	A3SS	Spermatocyte
21	ENSMUSG00000032816	Igdcc4	chr9	+	A3SS	Spermatocyte
22	ENSMUSG00000034973	Dopey1	chr9	+	A3SS	Spermatocyte
23	ENSMUSG00000068922	Msto1	chr3	-	A3SS	Spermatocyte
24	ENSMUSG00000079557	March2	chr17	-	A3SS	Spermatocyte
25	ENSMUSG00000000339	Rtca	chr3	-	A3SS	Spermatocyte
26	ENSMUSG00000023345	Poc1a	chr9	+	A3SS	Spermatocyte
27	ENSMUSG00000029670	Ing3	chr6	+	A3SS	Spermatocyte
28	ENSMUSG00000025758	Plk4	chr3	+	A3SS	Spermatocyte
29	ENSMUSG00000085396	Firre	chrX	-	A3SS	Spermatocyte
30	ENSMUSG00000028392	Bspry	chr4	+	A3SS	Spermatocyte
31	ENSMUSG00000029422	Rsrc2	chr5	-	A3SS	Spermatocyte
32	ENSMUSG00000020198	Ap3d1	chr10	-	A3SS	Spermatocyte
33	ENSMUSG00000045409	Trim39	chr17	-	A3SS	Spermatocyte
34	ENSMUSG00000030067	Foxp1	chr6	-	A3SS	Spermatocyte
35	ENSMUSG00000063889	Crem	chr18	-	A3SS	Spermatocyte
36	ENSMUSG00000032340	Neo1	chr9	-	A3SS	Spermatocyte
37	ENSMUSG00000071176	Arhgef10	chr8	+	A3SS	Spermatocyte
38	ENSMUSG00000034160	Ogt	chrX	+	A3SS	Spermatocyte
39	ENSMUSG00000022185	Acin1	chr14	-	A3SS	Spermatocyte
40	ENSMUSG00000042831	Alkbh6	chr7	+	A3SS	Spermatocyte
41	ENSMUSG00000034544	Rsrc1	chr3	+	A3SS	Spermatocyte
42	ENSMUSG00000071064	Zfp827	chr8	+	A3SS	Spermatocyte
43	ENSMUSG00000042207	Kdm5b	chr1	+	A3SS	Spermatocyte
44	ENSMUSG00000020328	Nudcd2	chr11	+	A3SS	Spermatocyte
45	ENSMUSG00000025607	Copg2	chr6	-	A3SS	Spermatocyte
46	ENSMUSG00000029472	Anapc5	chr5	-	A3SS	Spermatocyte
47	ENSMUSG00000024908	Ppp6r3	chr19	-	A3SS	Spermatocyte
48	ENSMUSG00000032637	Atxn2l	chr7	-	A3SS	Spermatocyte
49	ENSMUSG00000001065	Zfp276	chr8	+	A3SS	Spermatocyte
50	ENSMUSG00000045078	Rnf216	chr5	-	A3SS	Spermatocyte
51	ENSMUSG00000058135	Gstm1	chr3	-	A3SS	Spermatocyte
52	ENSMUSG00000037266	Rsrp1	chr4	+	A3SS	Spermatocyte
53	ENSMUSG00000015937	H2afy	chr13	-	A3SS	Spermatocyte
54	ENSMUSG00000037876	Jmjd1c	chr10	+	A3SS	Spermatocyte
55	ENSMUSG00000052331	Ankrd44	chr1	-	A3SS	Spermatocyte
56	ENSMUSG00000020952	Scfd1	chr12	+	A3SS	Spermatocyte
57	ENSMUSG00000040356	Skiv2l	chr17	-	A3SS	Spermatocyte
58	ENSMUSG00000070643	Sox13	chr1	-	A3SS	Spermatocyte
59	ENSMUSG00000029068	Ccnl2	chr4	+	A3SS	Spermatocyte
60	ENSMUSG00000062822	4833420G17Rik	chr13	+	A3SS	Spermatocyte
61	ENSMUSG00000029534	St7	chr6	+	A3SS	Spermatocyte
62	ENSMUSG00000028842	Ago3	chr4	-	A3SS	Spermatocyte
63	ENSMUSG00000026466	Tor1aip1	chr1	-	A3SS	Spermatocyte
64	ENSMUSG00000027569	Mrgbp	chr2	+	A3SS	Spermatocyte
65	ENSMUSG00000038671	Arfrp1	chr2	-	A3SS	Spermatocyte
66	ENSMUSG00000025486	Sirt3	chr7	-	A3SS	Spermatocyte
67	ENSMUSG00000035478	Mbd3	chr10	-	A3SS	Spermatocyte
68	ENSMUSG00000032815	Fanca	chr8	-	A3SS	Spermatocyte
69	ENSMUSG00000060985	Tdrd5	chr1	-	A3SS	Spermatocyte
70	ENSMUSG00000027751	Supt20	chr3	+	A3SS	Spermatocyte
71	ENSMUSG00000007570	Fance	chr17	+	A3SS	Spermatocyte
72	ENSMUSG00000028582	Cc2d1b	chr4	+	A3SS	Spermatocyte
73	ENSMUSG00000026082	Rev1	chr1	-	A3SS	Spermatocyte
74	ENSMUSG00000090841	Myl6	chr10	-	A3SS	Spermatocyte
75	ENSMUSG00000028049	Scamp3	chr3	+	A3SS	Spermatocyte
76	ENSMUSG00000022119	Rbm26	chr14	-	A3SS	Spermatocyte
77	ENSMUSG00000031715	Smarca5	chr8	-	A3SS	Spermatocyte
78	ENSMUSG00000074165	Zfp788	chr7	+	A3SS	Spermatocyte
79	ENSMUSG00000005682	Pan2	chr10	+	A3SS	Spermatocyte
80	ENSMUSG00000037364	Srrt	chr5	-	A3SS	Spermatocyte
81	ENSMUSG00000022678	Nde1	chr16	+	A3SS	Spermatocyte
82	ENSMUSG00000062743	Zfp677	chr17	+	A3SS	Spermatocyte
83	ENSMUSG00000036948	BC037034	chr5	-	A3SS	Spermatocyte
84	ENSMUSG00000026584	Scyl3	chr1	+	A3SS	Spermatocyte
85	ENSMUSG00000001376	Vps50	chr6	+	A3SS	Spermatocyte
86	ENSMUSG00000018474	Chd3	chr11	-	A3SS	Spermatocyte
87	ENSMUSG00000028484	Psip1	chr4	-	A3SS	Spermatocyte
88	ENSMUSG00000021428	Riok1	chr13	+	A3SS	Spermatocyte
89	ENSMUSG00000004677	Myo9b	chr8	+	A3SS	Spermatocyte
90	ENSMUSG00000052656	Rnf103	chr6	+	A3SS	Spermatocyte
91	ENSMUSG00000038412	Higd1a	chr9	-	A3SS	Spermatocyte
92	ENSMUSG00000040669	Phc1	chr6	-	A3SS	Spermatocyte
93	ENSMUSG00000092060	Bend4	chr5	-	A3SS	Spermatocyte
94	ENSMUSG00000018570	2810408A11Rik	chr11	-	A3SS	Spermatocyte
95	ENSMUSG00000053477	Tcf4	chr18	+	A3SS	Spermatocyte
96	ENSMUSG00000040667	Nup88	chr11	-	A3SS	Spermatocyte
97	ENSMUSG00000002105	Slc39a13	chr2	-	A3SS	Spermatocyte
98	ENSMUSG00000063870	Chd4	chr6	+	A3SS	Spermatocyte
99	ENSMUSG00000024906	Mus81	chr19	-	A3SS	Spermatocyte
100	ENSMUSG00000018861	Fdxr	chr11	-	A3SS	Spermatocyte
101	ENSMUSG00000030231	Plekha5	chr6	+	A3SS	Spermatocyte
102	ENSMUSG00000020982	Nemf	chr12	-	A3SS	Spermatocyte
103	ENSMUSG00000022995	Enah	chr1	-	A3SS	Spermatocyte
104	ENSMUSG00000025793	Hgs	chr11	+	A3SS	Spermatocyte
105	ENSMUSG00000018433	Nol11	chr11	-	A3SS	Spermatocyte
106	ENSMUSG00000002058	Unc119	chr11	+	A3SS	Spermatocyte
107	ENSMUSG00000027652	Ralgapb	chr2	+	A3SS	Spermatocyte
108	ENSMUSG00000030435	U2af2	chr7	+	A3SS	Spermatocyte
109	ENSMUSG00000002395	Use1	chr8	+	A3SS	Spermatocyte
110	ENSMUSG00000037426	Depdc5	chr5	+	A3SS	Spermatocyte
111	ENSMUSG00000032803	Cdv3	chr9	-	A3SS	Spermatocyte
112	ENSMUSG00000020128	Vps54	chr11	+	A3SS	Spermatocyte
113	ENSMUSG00000024735	Prpf19	chr19	+	A3SS	Spermatocyte
114	ENSMUSG00000035266	Helq	chr5	-	A3SS	Spermatocyte
115	ENSMUSG00000021431	Snrnp48	chr13	+	A3SS	Spermatocyte
116	ENSMUSG00000039671	Zmynd8	chr2	-	A3SS	Spermatocyte
117	ENSMUSG00000025159	Mms19	chr19	-	A3SS	Spermatocyte
118	ENSMUSG00000021905	Dph3	chr14	-	A3SS	Spermatocyte
119	ENSMUSG00000047417	Rexo1	chr10	-	A3SS	Spermatocyte
120	ENSMUSG00000027411	Vps16	chr2	+	A3SS	Spermatocyte
121	ENSMUSG00000030689	Ino80e	chr7	-	A3SS	Spermatocyte
122	ENSMUSG00000028759	Hp1bp3	chr4	+	A3SS	Spermatocyte
123	ENSMUSG00000020368	Canx	chr11	-	A3SS	Spermatocyte
124	ENSMUSG00000034771	Tle2	chr10	+	A3SS	Spermatocyte
125	ENSMUSG00000012535	Tnpo3	chr6	-	A3SS	Spermatocyte
126	ENSMUSG00000029141	Slc4a1ap	chr5	+	A3SS	Spermatocyte
127	ENSMUSG00000021819	Zswim8	chr14	+	A3SS	Spermatocyte
128	ENSMUSG00000027466	Rbck1	chr2	-	A3SS	Spermatocyte
129	ENSMUSG00000036779	Papd5	chr8	+	A3SS	Spermatocyte
130	ENSMUSG00000023079	Gtf2ird1	chr5	-	A3SS	Spermatocyte
131	ENSMUSG00000060288	Ppih	chr4	-	A3SS	Spermatocyte
132	ENSMUSG00000061950	Ppp4r1	chr17	+	A3SS	Spermatocyte
133	ENSMUSG00000002804	Nudt14	chr12	-	A3SS	Spermatocyte
134	ENSMUSG00000040712	Camta2	chr11	-	A3SS	Spermatocyte
135	ENSMUSG00000036819	Jmjd4	chr11	+	A3SS	Spermatocyte
136	ENSMUSG00000068329	Htra2	chr6	-	A3SS	Spermatocyte
137	ENSMUSG00000040785	Ttc3	chr16	+	A3SS	Spermatocyte
138	ENSMUSG00000000037	Scml2	chrX	+	A3SS	Spermatocyte
139	ENSMUSG00000005069	Pex5	chr6	-	A3SS	Spermatocyte
140	ENSMUSG00000037313	Tacc3	chr5	+	A3SS	Spermatocyte
141	ENSMUSG00000031516	Dctn6	chr8	-	A3SS	Spermatocyte
142	ENSMUSG00000029478	Ncor2	chr5	-	A3SS	Spermatocyte
143	ENSMUSG00000030846	Tial1	chr7	-	A3SS	Spermatocyte
144	ENSMUSG00000026798	Coq4	chr2	+	A3SS	Spermatocyte
145	ENSMUSG00000025437	Usp33	chr3	+	A3SS	Spermatocyte
146	ENSMUSG00000028273	Pdlim5	chr3	-	A3SS	Spermatocyte
147	ENSMUSG00000035569	Ankrd11	chr8	-	A3SS	Spermatocyte
148	ENSMUSG00000021235	Coq6	chr12	+	A3SS	Spermatocyte
149	ENSMUSG00000001909	Trmt1	chr8	+	A3SS	Spermatocyte
150	ENSMUSG00000034724	Cnot6l	chr5	-	A3SS	Spermatocyte
151	ENSMUSG00000019373	Cops3	chr11	-	A3SS	Spermatocyte
152	ENSMUSG00000001441	Npepps	chr11	-	A3SS	Spermatocyte
153	ENSMUSG00000046432	Bex3	chrX	+	A3SS	Spermatocyte
154	ENSMUSG00000004626	Stxbp2	chr8	+	A3SS	Spermatocyte
155	ENSMUSG00000037904	Ankrd9	chr12	-	A3SS	Spermatocyte
156	ENSMUSG00000038346	Zfp384	chr6	+	A3SS	Spermatocyte
157	ENSMUSG00000030638	Sh3gl3	chr7	+	A3SS	Spermatocyte
158	ENSMUSG00000026812	Tsc1	chr2	+	A3SS	Spermatocyte
159	ENSMUSG00000030706	Mrpl48	chr7	-	A3SS	Spermatocyte
160	ENSMUSG00000031171	Ftsj1	chrX	-	A3SS	Spermatocyte
161	ENSMUSG00000021481	Zfp346	chr13	+	A3SS	Spermatocyte
162	ENSMUSG00000042032	Mat2b	chr11	-	A3SS	Spermatocyte
163	ENSMUSG00000020070	Rufy2	chr10	+	A3SS	Spermatocyte
164	ENSMUSG00000034813	Grip1	chr10	+	A3SS	Spermatocyte
165	ENSMUSG00000032567	Aste1	chr9	+	A3SS	Spermatocyte
166	ENSMUSG00000030271	Ogg1	chr6	+	A3SS	Spermatocyte
167	ENSMUSG00000025616	Usp16	chr16	+	A3SS	Spermatocyte
168	ENSMUSG00000036503	Rnf13	chr3	+	A3SS	Spermatocyte
169	ENSMUSG00000021694	Ercc8	chr13	+	A3SS	Spermatocyte
170	ENSMUSG00000031314	Taf1	chrX	+	A3SS	Spermatocyte
171	ENSMUSG00000059834	Sclt1	chr3	-	A3SS	Spermatocyte
172	ENSMUSG00000026821	Ralgds	chr2	+	A3SS	Spermatocyte
173	ENSMUSG00000029705	Cux1	chr5	-	A3SS	Spermatocyte
174	ENSMUSG00000037552	Plekhg2	chr7	-	A3SS	Spermatocyte
175	ENSMUSG00000034928	Rnf44	chr13	-	A3SS	Spermatocyte
176	ENSMUSG00000035021	Baz1a	chr12	-	A3SS	Spermatocyte
177	ENSMUSG00000024160	Spsb3	chr17	+	A3SS	Spermatocyte
178	ENSMUSG00000027088	Phospho2	chr2	+	A3SS	Spermatocyte
179	ENSMUSG00000062590	Armc9	chr1	+	A3SS	Spermatocyte
180	ENSMUSG00000031485	Prosc	chr8	+	A3SS	Spermatocyte
181	ENSMUSG00000030465	Psd3	chr8	-	A3SS	Spermatocyte
182	ENSMUSG00000014873	Surf2	chr2	+	A3SS	Spermatocyte
183	ENSMUSG00000032480	Dhx30	chr9	-	A3SS	Spermatocyte
184	ENSMUSG00000019471	Cdc37	chr9	-	A3SS	Spermatocyte
185	ENSMUSG00000029130	Rnf32	chr5	+	A3SS	Spermatocyte
186	ENSMUSG00000043987	Cep164	chr9	-	A3SS	Spermatocyte
187	ENSMUSG00000020594	Pum2	chr12	+	A3SS	Spermatocyte
188	ENSMUSG00000041264	Uspl1	chr5	+	A3SS	Spermatocyte
189	ENSMUSG00000027677	Ttc14	chr3	+	A3SS	Spermatocyte
190	ENSMUSG00000031729	Ist1	chr8	-	A3SS	Spermatocyte
191	ENSMUSG00000013155	Enkd1	chr8	-	A3SS	Spermatocyte
192	ENSMUSG00000029209	Gnpda2	chr5	-	A3SS	Spermatocyte
193	ENSMUSG00000030929	Eri2	chr7	-	A3SS	Spermatocyte
194	ENSMUSG00000023994	Nfya	chr17	-	A3SS	Spermatocyte
195	ENSMUSG00000039542	Ncam1	chr9	-	A3SS	Spermatocyte
196	ENSMUSG00000059689	Zfp637	chr6	+	A3SS	Spermatocyte
197	ENSMUSG00000006720	Zfp184	chr13	+	A3SS	Spermatocyte
198	ENSMUSG00000028347	Tmeff1	chr4	+	A3SS	Spermatocyte
199	ENSMUSG00000040675	Mthfd1l	chr10	+	A3SS	Spermatocyte
200	ENSMUSG00000074358	Ccdc61	chr7	-	A3SS	Spermatocyte
201	ENSMUSG00000033096	Apmap	chr2	-	A3SS	Spermatocyte
202	ENSMUSG00000031816	Mthfsd	chr8	-	A3SS	Spermatocyte
203	ENSMUSG00000029003	Mad2l2	chr4	+	A3SS	Spermatocyte
204	ENSMUSG00000032525	Nktr	chr9	+	A3SS	Spermatocyte
205	ENSMUSG00000003617	Cp	chr3	+	A3SS	Spermatocyte
206	ENSMUSG00000030598	Fbxo17	chr7	+	A3SS	Spermatocyte
207	ENSMUSG00000036860	Mrpl55	chr11	+	A3SS	Spermatocyte
208	ENSMUSG00000028453	Fancg	chr4	-	A3SS	Spermatocyte
209	ENSMUSG00000042302	Ehbp1	chr11	-	A3SS	Spermatocyte
210	ENSMUSG00000027620	Rbm39	chr2	-	A3SS	Spermatocyte
211	ENSMUSG00000021906	Oxnad1	chr14	+	A3SS	Spermatocyte
212	ENSMUSG00000111375	Btbd8	chr5	+	A3SS	Spermatocyte
213	ENSMUSG00000025967	Eef1b2	chr1	+	A3SS	Spermatocyte
214	ENSMUSG00000028060	2810403A07Rik	chr3	+	A3SS	Spermatocyte
215	ENSMUSG00000038733	Wdr26	chr1	-	A3SS	Spermatocyte
216	ENSMUSG00000068115	Ninl	chr2	-	A3SS	Spermatocyte
217	ENSMUSG00000027263	Tubgcp4	chr2	+	A3SS	Spermatocyte
218	ENSMUSG00000007080	Pole	chr5	+	A3SS	Spermatocyte
219	ENSMUSG00000038274	Fau	chr19	+	A3SS	Spermatocyte
220	ENSMUSG00000018398	Sept8	chr11	+	A3SS	Spermatocyte
221	ENSMUSG00000030409	Dmpk	chr7	+	A3SS	Spermatocyte
222	ENSMUSG00000020232	Hmg20b	chr10	-	A3SS	Spermatocyte
223	ENSMUSG00000034175	Rhbdd3	chr11	+	A3SS	Spermatocyte
224	ENSMUSG00000039660	Spout1	chr2	-	A3SS	Spermatocyte
225	ENSMUSG00000037503	Fam168b	chr1	-	A3SS	Spermatocyte
226	ENSMUSG00000020472	Zkscan17	chr11	-	A3SS	Spermatocyte
227	ENSMUSG00000080316	Spaca6	chr17	+	A3SS	Spermatocyte
228	ENSMUSG00000045503	Sys1	chr2	+	A3SS	Spermatocyte
229	ENSMUSG00000061474	Mrps36	chr13	-	A3SS	Spermatocyte
230	ENSMUSG00000035798	Zdhhc17	chr10	-	A3SS	Spermatocyte
231	ENSMUSG00000051811	Cox6b2	chr7	-	A3SS	Spermatocyte
232	ENSMUSG00000039536	Stau1	chr2	-	A3SS	Spermatocyte
233	ENSMUSG00000036202	Rif1	chr2	+	A3SS	Spermatocyte
234	ENSMUSG00000035545	Leng8	chr7	+	A3SS	Spermatocyte
235	ENSMUSG00000025199	Chuk	chr19	-	A3SS	Spermatocyte
236	ENSMUSG00000041341	Atg2b	chr12	-	A3SS	Spermatocyte
237	ENSMUSG00000073468	Sft2d1	chr17	+	A3SS	Spermatocyte
238	ENSMUSG00000018449	Rpain	chr11	+	A3SS	Spermatocyte
239	ENSMUSG00000068823	Csde1	chr3	+	A3SS	Spermatocyte
240	ENSMUSG00000029625	Cpsf4	chr5	+	A3SS	Spermatocyte
241	ENSMUSG00000036733	Rbm42	chr7	-	A3SS	Spermatocyte
242	ENSMUSG00000022827	Rabl3	chr16	+	A3SS	Spermatocyte
243	ENSMUSG00000014418	Hps5	chr7	-	A3SS	Spermatocyte
244	ENSMUSG00000040855	Reps2	chrX	-	A3SS	Spermatocyte
245	ENSMUSG00000028689	Ccdc163	chr4	+	A3SS	Spermatocyte
246	ENSMUSG00000030330	Ing4	chr6	+	A3SS	Spermatocyte
247	ENSMUSG00000057649	Brd9	chr13	+	A3SS	Spermatocyte
248	ENSMUSG00000029510	Gpc2	chr5	-	A3SS	Spermatocyte
249	ENSMUSG00000029089	5730480H06Rik	chr5	+	A3SS	Spermatocyte
250	ENSMUSG00000043262	Uevld	chr7	-	A3SS	Spermatocyte
251	ENSMUSG00000005804	Bloc1s6	chr2	+	A3SS	Spermatocyte
252	ENSMUSG00000037355	Uvssa	chr5	+	A3SS	Spermatocyte
253	ENSMUSG00000073888	Ccl27a	chr4	-	A3SS	Spermatocyte
254	ENSMUSG00000034729	Mrps10	chr17	+	A3SS	Spermatocyte
255	ENSMUSG00000020166	Cnot2	chr10	-	A3SS	Spermatocyte
256	ENSMUSG00000056050	Mia3	chr1	-	A3SS	Spermatocyte
257	ENSMUSG00000005982	Naa60	chr16	+	A3SS	Spermatocyte
258	ENSMUSG00000033439	Trmt13	chr3	-	A3SS	Spermatocyte
259	ENSMUSG00000024963	Dnajc4	chr19	-	A3SS	Spermatocyte
260	ENSMUSG00000029592	Usp30	chr5	+	A3SS	Spermatocyte
261	ENSMUSG00000005417	Mprip	chr11	+	A3SS	Spermatocyte
262	ENSMUSG00000052593	Adam17	chr12	-	A3SS	Spermatocyte
263	ENSMUSG00000042508	Dmtf1	chr5	-	A3SS	Spermatocyte
264	ENSMUSG00000028545	Bend5	chr4	+	A3SS	Spermatocyte
265	ENSMUSG00000008855	Hdac5	chr11	-	A3SS	Spermatocyte
266	ENSMUSG00000028152	Tspan5	chr3	+	A3SS	Spermatocyte
267	ENSMUSG00000021557	Agtpbp1	chr13	-	A3SS	Spermatocyte
268	ENSMUSG00000024805	Pcgf5	chr19	+	A3SS	Spermatocyte
269	ENSMUSG00000067629	Syngap1	chr17	+	A3SS	Spermatocyte
270	ENSMUSG00000020476	Dbnl	chr11	+	A3SS	Spermatocyte
271	ENSMUSG00000020212	Mdm1	chr10	+	A3SS	Spermatocyte
272	ENSMUSG00000046169	Adamts6	chr13	+	A3SS	Spermatocyte
273	ENSMUSG00000060862	Zbtb40	chr4	-	A3SS	Spermatocyte
274	ENSMUSG00000044573	Acp1	chr12	-	A3SS	Spermatocyte
275	ENSMUSG00000033596	Rfwd3	chr8	-	A3SS	Spermatocyte
276	ENSMUSG00000022822	Abcc5	chr16	-	A3SS	Spermatocyte
277	ENSMUSG00000043243	Fam129c	chr8	+	A3SS	Spermatocyte
278	ENSMUSG00000036768	Kif15	chr9	+	A3SS	Spermatocyte
279	ENSMUSG00000017686	Rhot1	chr11	+	A3SS	Spermatocyte
280	ENSMUSG00000033055	Ankrd54	chr15	-	A3SS	Spermatocyte
281	ENSMUSG00000034573	Ptpn13	chr5	+	A3SS	Spermatocyte
282	ENSMUSG00000026670	Uap1	chr1	-	A3SS	Spermatocyte
283	ENSMUSG00000036112	Metap2	chr10	-	A3SS	Spermatocyte
284	ENSMUSG00000010453	Kansl3	chr1	-	A3SS	Spermatocyte
285	ENSMUSG00000042826	Fgf11	chr11	-	A3SS	Spermatocyte
286	ENSMUSG00000005583	Mef2c	chr13	+	A3SS	Spermatocyte
287	ENSMUSG00000026020	Nop58	chr1	+	A3SS	Spermatocyte
288	ENSMUSG00000039768	Dnajc11	chr4	+	A3SS	Spermatocyte
289	ENSMUSG00000038695	Josd2	chr7	+	A3SS	Spermatocyte
290	ENSMUSG00000068762	Gstm6	chr3	-	A3SS	Spermatocyte
291	ENSMUSG00000039458	Mtmr12	chr15	+	A3SS	Spermatocyte
292	ENSMUSG00000026456	Cyb5r1	chr1	+	A3SS	Spermatocyte
293	ENSMUSG00000020231	Dip2a	chr10	-	A3SS	Spermatocyte
294	ENSMUSG00000020464	Pnpt1	chr11	+	A3SS	Spermatocyte
295	ENSMUSG00000027001	Dusp19	chr2	+	A3SS	Spermatocyte
296	ENSMUSG00000061286	Exosc5	chr7	+	A3SS	Spermatocyte
297	ENSMUSG00000020220	Vps13d	chr4	-	A3SS	Spermatocyte
298	ENSMUSG00000037339	Fam53a	chr5	-	A3SS	Spermatocyte
299	ENSMUSG00000041769	Ppp2r2d	chr7	+	A3SS	Spermatocyte
300	ENSMUSG00000036270	Edc4	chr8	+	A3SS	Spermatocyte
301	ENSMUSG00000023007	Prpf40b	chr15	+	A3SS	Spermatocyte
302	ENSMUSG00000035382	Pcsk7	chr9	+	A3SS	Spermatocyte
303	ENSMUSG00000040928	S100pbp	chr4	-	A3SS	Spermatocyte
304	ENSMUSG00000019856	Fam184a	chr10	-	A3SS	Spermatocyte
305	ENSMUSG00000041164	Zmiz2	chr11	+	A3SS	Spermatocyte
306	ENSMUSG00000028864	Hgf	chr5	+	A3SS	Spermatocyte
307	ENSMUSG00000047554	Tmem41b	chr7	-	A3SS	Spermatocyte
308	ENSMUSG00000014850	Msh3	chr13	-	A3SS	Spermatocyte
309	ENSMUSG00000025591	Tma16	chr8	-	A3SS	Spermatocyte
310	ENSMUSG00000038895	Zfp653	chr9	-	A3SS	Spermatocyte
311	ENSMUSG00000000134	Tfe3	chrX	+	A3SS	Spermatocyte
312	ENSMUSG00000032299	Commd4	chr9	-	A3SS	Spermatocyte
313	ENSMUSG00000026708	Cenpl	chr1	+	A3SS	Spermatocyte
314	ENSMUSG00000042570	Mier2	chr10	-	A3SS	Spermatocyte
315	ENSMUSG00000028639	Ybx1	chr4	-	A3SS	Spermatocyte
316	ENSMUSG00000028059	Arhgef2	chr3	+	A3SS	Spermatocyte
317	ENSMUSG00000045482	Trrap	chr5	+	A3SS	Spermatocyte
318	ENSMUSG00000028034	Fubp1	chr3	+	A3SS	Spermatocyte
319	ENSMUSG00000027615	Hps3	chr3	-	A3SS	Spermatocyte
320	ENSMUSG00000004815	Dgkq	chr5	-	A3SS	Spermatocyte
321	ENSMUSG00000068882	Ssb	chr2	+	A3SS	Spermatocyte
322	ENSMUSG00000051278	Zgrf1	chr3	+	A3SS	Spermatocyte
323	ENSMUSG00000033793	Atp6v1h	chr1	+	A3SS	Spermatocyte
324	ENSMUSG00000031982	Arv1	chr8	+	A3SS	Spermatocyte
325	ENSMUSG00000028134	Ptbp2	chr3	-	A3SS	Spermatocyte
326	ENSMUSG00000052926	Rnaseh2a	chr8	-	A3SS	Spermatocyte
327	ENSMUSG00000072653	Zfp783	chr6	+	A3SS	Spermatocyte
328	ENSMUSG00000000131	Xpo6	chr7	-	A3SS	Spermatocyte
329	ENSMUSG00000001844	Zdhhc4	chr5	-	A3SS	Spermatocyte
330	ENSMUSG00000053119	Chmp3	chr6	+	A3SS	Spermatocyte
331	ENSMUSG00000032562	Gnai2	chr9	-	A3SS	Spermatocyte
332	ENSMUSG00000003309	Ap1m2	chr9	-	A3SS	Spermatocyte
333	ENSMUSG00000062729	Ppox	chr1	-	A3SS	Spermatocyte
334	ENSMUSG00000021176	Efcab11	chr12	-	A3SS	Spermatocyte
335	ENSMUSG00000002983	Relb	chr7	-	A3SS	Spermatocyte
336	ENSMUSG00000036391	Sec24a	chr11	-	A3SS	Spermatocyte
337	ENSMUSG00000031851	Ntpcr	chr8	+	A3SS	Spermatocyte
338	ENSMUSG00000003299	Mrpl4	chr9	+	A3SS	Spermatocyte
339	ENSMUSG00000024483	Ankhd1	chr18	+	A3SS	Spermatocyte
340	ENSMUSG00000025409	Mbd6	chr10	-	A3SS	Spermatocyte
341	ENSMUSG00000041975	Mettl8	chr2	-	A3SS	Spermatocyte
342	ENSMUSG00000003166	Dgcr2	chr16	-	A3SS	Spermatocyte
343	ENSMUSG00000031922	Cep57	chr9	-	A3SS	Spermatocyte
344	ENSMUSG00000060601	Nr1h2	chr7	-	A3SS	Spermatocyte
345	ENSMUSG00000014668	Chfr	chr5	+	A3SS	Spermatocyte
346	ENSMUSG00000000441	Raf1	chr6	-	A3SS	Spermatocyte
347	ENSMUSG00000036570	Fxyd1	chr7	-	A3SS	Spermatocyte
348	ENSMUSG00000032058	Ppp2r1b	chr9	+	A3SS	Spermatocyte
349	ENSMUSG00000026150	Mff	chr1	+	A3SS	Spermatocyte
350	ENSMUSG00000031562	Dctd	chr8	+	A3SS	Spermatocyte
351	ENSMUSG00000046836	Brox	chr1	-	A3SS	Spermatocyte
352	ENSMUSG00000023707	Ogfod2	chr5	+	A3SS	Spermatocyte
353	ENSMUSG00000067825	Pex26	chr6	+	A3SS	Spermatocyte
354	ENSMUSG00000023904	Hcfc1r1	chr17	+	A3SS	Spermatocyte
355	ENSMUSG00000002833	Hdgfl2	chr17	+	A3SS	Spermatocyte
356	ENSMUSG00000034327	Kctd9	chr14	+	A3SS	Spermatocyte
357	ENSMUSG00000033111	3830406C13Rik	chr14	+	A3SS	Spermatocyte
358	ENSMUSG00000061689	Dlgap4	chr2	+	A3SS	Spermatocyte
359	ENSMUSG00000039242	B3galnt2	chr13	+	A3SS	Spermatocyte
360	ENSMUSG00000060036	Rpl3	chr15	-	A3SS	Spermatocyte
361	ENSMUSG00000060206	Zfp462	chr4	+	A3SS	Spermatocyte
362	ENSMUSG00000025372	Baiap2	chr11	+	A3SS	Spermatocyte
363	ENSMUSG00000033916	Chmp2a	chr7	-	A3SS	Spermatocyte
364	ENSMUSG00000037470	Uggt1	chr1	-	A3SS	Spermatocyte
365	ENSMUSG00000039068	Zzz3	chr3	+	A3SS	Spermatocyte
366	ENSMUSG00000052337	Immt	chr6	+	A3SS	Spermatocyte
367	ENSMUSG00000061559	Wdr61	chr9	-	A3SS	Spermatocyte
368	ENSMUSG00000026455	Klhl12	chr1	+	A3SS	Spermatocyte
369	ENSMUSG00000030849	Fgfr2	chr7	-	A3SS	Spermatocyte
370	ENSMUSG00000032582	Rbm6	chr9	-	A3SS	Spermatocyte
371	ENSMUSG00000024283	Wac	chr18	+	A3SS	Spermatocyte
372	ENSMUSG00000064036	Mro	chr18	+	A3SS	Spermatocyte
373	ENSMUSG00000028066	Pmf1	chr3	-	A3SS	Spermatocyte
374	ENSMUSG00000032966	Fkbp1a	chr2	+	A3SS	Spermatocyte
375	ENSMUSG00000030583	Sipa1l3	chr7	-	A3SS	Spermatocyte
376	ENSMUSG00000059939	9430015G10Rik	chr4	+	A3SS	Spermatocyte
377	ENSMUSG00000020659	Cbll1	chr12	-	A3SS	Spermatocyte
378	ENSMUSG00000023991	Foxp4	chr17	-	A3SS	Spermatocyte
379	ENSMUSG00000021417	Eci2	chr13	-	A3SS	Spermatocyte
380	ENSMUSG00000054256	Msi1	chr5	+	A3SS	Spermatocyte
381	ENSMUSG00000026790	Odf2	chr2	+	A3SS	Spermatocyte
382	ENSMUSG00000020692	Nle1	chr11	-	A3SS	Spermatocyte
383	ENSMUSG00000030323	Ift122	chr6	+	A3SS	Spermatocyte
384	ENSMUSG00000040225	Prrc2c	chr1	-	A3SS	Spermatocyte
385	ENSMUSG00000060261	Gtf2i	chr5	-	A3SS	Spermatocyte
386	ENSMUSG00000028952	Zbtb48	chr4	-	A3SS	Spermatocyte
387	ENSMUSG00000029389	Ddx55	chr5	+	A3SS	Spermatocyte
388	ENSMUSG00000042185	Nfrkb	chr9	+	A3SS	Spermatocyte
389	ENSMUSG00000028107	Tars2	chr3	-	A3SS	Spermatocyte
390	ENSMUSG00000038271	Iffo1	chr6	+	A3SS	Spermatocyte
391	ENSMUSG00000025193	Cutc	chr19	+	A3SS	Spermatocyte
392	ENSMUSG00000038365	Fbxo25	chr8	+	A3SS	Spermatocyte
393	ENSMUSG00000031907	Zfp90	chr8	+	A3SS	Spermatocyte
394	ENSMUSG00000036817	Sun1	chr5	+	A3SS	Spermatocyte
395	ENSMUSG00000035597	Prpf39	chr12	+	A3SS	Spermatocyte
396	ENSMUSG00000035505	Cox18	chr5	-	A3SS	Spermatocyte
397	ENSMUSG00000063450	Syne2	chr12	+	A3SS	Spermatocyte
398	ENSMUSG00000017715	Pgs1	chr11	+	A3SS	Spermatocyte
399	ENSMUSG00000032827	Ppp1r9a	chr6	+	A3SS	Spermatocyte
400	ENSMUSG00000023150	Ivns1abp	chr1	+	A3SS	Spermatocyte
401	ENSMUSG00000035437	Rabgap1	chr2	+	A3SS	Spermatocyte
402	ENSMUSG00000057363	Uxs1	chr1	-	A3SS	Spermatocyte
403	ENSMUSG00000036622	Atp13a2	chr4	+	A3SS	Spermatocyte
404	ENSMUSG00000022386	Trmu	chr15	+	A3SS	Spermatocyte
405	ENSMUSG00000037761	Actr5	chr2	+	A3SS	Spermatocyte
406	ENSMUSG00000019590	Cyb561	chr11	-	A3SS	Spermatocyte
407	ENSMUSG00000036502	Tmem255a	chrX	-	A3SS	Spermatocyte
408	ENSMUSG00000037262	Kin	chr2	+	A3SS	Spermatocyte
409	ENSMUSG00000071669	Snx29	chr16	+	A3SS	Spermatocyte
410	ENSMUSG00000042210	Abhd14a	chr9	-	A3SS	Spermatocyte
411	ENSMUSG00000021134	Srsf5	chr12	+	A3SS	Spermatocyte
412	ENSMUSG00000018501	Ncor1	chr11	-	A3SS	Spermatocyte
413	ENSMUSG00000041483	Zfp281	chr1	+	A3SS	Spermatocyte
414	ENSMUSG00000038780	Smurf1	chr5	-	A3SS	Spermatocyte
415	ENSMUSG00000032316	Clk3	chr9	-	A3SS	Spermatocyte
416	ENSMUSG00000062270	Morf4l1	chr9	-	A3SS	Spermatocyte
417	ENSMUSG00000025316	Banp	chr8	+	A3SS	Spermatocyte
418	ENSMUSG00000030177	Ccdc77	chr6	-	A3SS	Spermatocyte
419	ENSMUSG00000032633	Flcn	chr11	-	A3SS	Spermatocyte
420	ENSMUSG00000038533	Cbfa2t2	chr2	+	A3SS	Spermatocyte
421	ENSMUSG00000032621	Srek1	chr13	-	A3SS	Spermatocyte
422	ENSMUSG00000037926	Ssh2	chr11	+	A3SS	Spermatocyte
423	ENSMUSG00000041477	Dcp1b	chr6	+	A3SS	Spermatocyte
424	ENSMUSG00000029283	Cdc7	chr5	+	A3SS	Spermatocyte
425	ENSMUSG00000020743	Mif4gd	chr11	-	A3SS	Spermatocyte
426	ENSMUSG00000012609	Ttll5	chr12	+	A3SS	Spermatocyte
427	ENSMUSG00000031167	Rbm3	chrX	-	A3SS	Spermatocyte
428	ENSMUSG00000028150	Rorc	chr3	+	A3SS	Spermatocyte
429	ENSMUSG00000038775	Vill	chr9	+	A3SS	Spermatocyte
430	ENSMUSG00000039936	Pik3cd	chr4	-	A3SS	Spermatocyte
431	ENSMUSG00000024539	Ptpn2	chr18	-	A3SS	Spermatocyte
432	ENSMUSG00000058318	Phf21a	chr2	+	A3SS	Spermatocyte
433	ENSMUSG00000030780	BC017158	chr7	-	A3SS	Spermatocyte
434	ENSMUSG00000055723	Rras2	chr7	-	A3SS	Spermatocyte
435	ENSMUSG00000054387	Mdm4	chr1	-	A3SS	Spermatocyte
436	ENSMUSG00000066037	Hnrnpr	chr4	+	A3SS	Spermatocyte
437	ENSMUSG00000042323	Pbrm1	chr14	+	A3SS	Spermatocyte
438	ENSMUSG00000038126	Mphosph9	chr5	-	A3SS	Spermatocyte
439	ENSMUSG00000021546	Hnrnpk	chr13	-	A3SS	Spermatocyte
440	ENSMUSG00000001416	Cct3	chr3	+	A3SS	Spermatocyte
441	ENSMUSG00000078671	Chd2	chr7	-	A3SS	Spermatocyte
442	ENSMUSG00000012296	Tjap1	chr17	-	A3SS	Spermatocyte
443	ENSMUSG00000039041	Adrm1	chr2	+	A3SS	Spermatocyte
444	ENSMUSG00000029165	Agbl5	chr5	+	A3SS	Spermatocyte
445	ENSMUSG00000013787	Ehmt2	chr17	+	A3SS	Spermatocyte
446	ENSMUSG00000026342	Slc35f5	chr1	+	A3SS	Spermatocyte
447	ENSMUSG00000058298	Mcm9	chr10	-	A3SS	Spermatocyte
448	ENSMUSG00000031568	Rwdd4a	chr8	+	A3SS	Spermatocyte
449	ENSMUSG00000026925	Inpp5e	chr2	-	A3SS	Spermatocyte
450	ENSMUSG00000049482	Ctu2	chr8	+	A3SS	Spermatocyte
451	ENSMUSG00000045180	Shroom2	chrX	-	A3SS	Spermatocyte
452	ENSMUSG00000047248	C2cd3	chr7	+	A3SS	Spermatocyte
453	ENSMUSG00000004931	Apba3	chr10	+	A3SS	Spermatocyte
454	ENSMUSG00000021218	Gdi2	chr13	+	A3SS	Spermatocyte
455	ENSMUSG00000028573	Fggy	chr4	+	A3SS	Spermatocyte
456	ENSMUSG00000025142	Aspscr1	chr11	+	A3SS	Spermatocyte
457	ENSMUSG00000035632	Cnot3	chr7	+	A3SS	Spermatocyte
458	ENSMUSG00000029512	Ulk1	chr5	-	A3SS	Spermatocyte
459	ENSMUSG00000016181	Diexf	chr1	-	A3SS	Spermatocyte
460	ENSMUSG00000000759	Tubgcp3	chr8	-	A3SS	Spermatocyte
461	ENSMUSG00000019302	Atp6v0a1	chr11	+	A3SS	Spermatocyte
462	ENSMUSG00000020687	Cdc27	chr11	-	A3SS	Spermatocyte
463	ENSMUSG00000029064	Gnb1	chr4	+	A3SS	Spermatocyte
464	ENSMUSG00000006676	Usp19	chr9	+	A3SS	Spermatocyte
465	ENSMUSG00000030759	Far1	chr7	+	A3SS	Spermatocyte
466	ENSMUSG00000042699	Dhx9	chr1	-	A3SS	Spermatocyte
467	ENSMUSG00000026219	Trip12	chr1	-	A3SS	Spermatocyte
468	ENSMUSG00000031626	Sorbs2	chr8	+	A3SS	Spermatocyte
469	ENSMUSG00000021585	Cast	chr13	-	A3SS	Spermatocyte
470	ENSMUSG00000023051	Tarbp2	chr15	+	A3SS	Spermatocyte
471	ENSMUSG00000031065	Cdk16	chrX	+	A3SS	Spermatocyte
472	ENSMUSG00000037190	Cyb561d2	chr9	-	A3SS	Spermatocyte
473	ENSMUSG00000024422	Dhx16	chr17	+	A3SS	Spermatocyte
474	ENSMUSG00000039048	Foxred1	chr9	-	A3SS	Spermatocyte
475	ENSMUSG00000024044	Epb41l3	chr17	+	A3SS	Spermatocyte
476	ENSMUSG00000033852	Gm28042	chr2	+	A3SS	Spermatocyte
477	ENSMUSG00000062647	Rpl7a	chr2	+	A3SS	Spermatocyte
478	ENSMUSG00000055897	Ppp4r1l-ps	chr2	-	A3SS	Spermatocyte
479	ENSMUSG00000063511	Snrnp70	chr7	-	A3SS	Spermatocyte
480	ENSMUSG00000021175	Cdca7l	chr12	+	A3SS	Spermatocyte
481	ENSMUSG00000020056	Washc3	chr10	+	A3SS	Spermatocyte
482	ENSMUSG00000032478	Nme6	chr9	+	A3SS	Spermatocyte
483	ENSMUSG00000038611	Phrf1	chr7	+	A3SS	Spermatocyte
484	ENSMUSG00000025665	Rps6ka6	chrX	-	A3SS	Spermatocyte
485	ENSMUSG00000030316	Tamm41	chr6	-	A3SS	Spermatocyte
486	ENSMUSG00000028708	Mknk1	chr4	+	A3SS	Spermatocyte
487	ENSMUSG00000037174	Elf2	chr3	-	A3SS	Spermatocyte
488	ENSMUSG00000026641	Usf1	chr1	+	A3SS	Spermatocyte
489	ENSMUSG00000039753	Fbxl5	chr5	-	A3SS	Spermatocyte
490	ENSMUSG00000021555	Naa35	chr13	+	A3SS	Spermatocyte
491	ENSMUSG00000030590	Fam98c	chr7	-	A3SS	Spermatocyte
492	ENSMUSG00000038095	Sbno1	chr5	-	A3SS	Spermatocyte
493	ENSMUSG00000015790	Surf1	chr2	-	A3SS	Spermatocyte
494	ENSMUSG00000026816	Gtf3c5	chr2	-	A3SS	Spermatocyte
495	ENSMUSG00000036550	Cnot1	chr8	-	A3SS	Spermatocyte
496	ENSMUSG00000020873	Slc35b1	chr11	+	A3SS	Spermatocyte
497	ENSMUSG00000018572	Phf23	chr11	+	A3SS	Spermatocyte
498	ENSMUSG00000043411	Usp48	chr4	+	A3SS	Spermatocyte
499	ENSMUSG00000026626	Ppp2r5a	chr1	-	A3SS	Spermatocyte
500	ENSMUSG00000028106	Rprd2	chr3	-	A3SS	Spermatocyte
501	ENSMUSG00000038712	Mindy1	chr3	+	A3SS	Spermatocyte
502	ENSMUSG00000022999	Lmbr1l	chr15	-	A3SS	Spermatocyte
503	ENSMUSG00000078350	Smim1	chr4	-	A3SS	Spermatocyte
504	ENSMUSG00000021275	Tecpr2	chr12	+	A3SS	Spermatocyte
505	ENSMUSG00000022973	Synj1	chr16	-	A3SS	Spermatocyte
506	ENSMUSG00000001017	Chtop	chr3	-	A3SS	Spermatocyte
507	ENSMUSG00000052456	Asna1	chr8	-	A3SS	Spermatocyte
508	ENSMUSG00000025007	Aldh18a1	chr19	-	A5SS	Spermatocyte
509	ENSMUSG00000052812	Atad2b	chr12	+	A5SS	Spermatocyte
510	ENSMUSG00000022884	Eif4a2	chr16	+	A5SS	Spermatocyte
511	ENSMUSG00000041890	Git2	chr5	-	A5SS	Spermatocyte
512	ENSMUSG00000054770	Kctd18	chr1	-	A5SS	Spermatocyte
513	ENSMUSG00000026048	Ercc5	chr1	+	A5SS	Spermatocyte
514	ENSMUSG00000032580	Rbm5	chr9	-	A5SS	Spermatocyte
515	ENSMUSG00000014856	Tmem208	chr8	+	A5SS	Spermatocyte
516	ENSMUSG00000036632	Alg5	chr3	+	A5SS	Spermatocyte
517	ENSMUSG00000020882	Cacnb1	chr11	-	A5SS	Spermatocyte
518	ENSMUSG00000040599	Mis12	chr11	+	A5SS	Spermatocyte
519	ENSMUSG00000028646	Rragc	chr4	+	A5SS	Spermatocyte
520	ENSMUSG00000035310	Lin54	chr5	-	A5SS	Spermatocyte
521	ENSMUSG00000041459	Tardbp	chr4	-	A5SS	Spermatocyte
522	ENSMUSG00000013736	Trnt1	chr6	+	A5SS	Spermatocyte
523	ENSMUSG00000040410	Fbxl4	chr4	+	A5SS	Spermatocyte
524	ENSMUSG00000040174	Alkbh3	chr2	-	A5SS	Spermatocyte
525	ENSMUSG00000068922	Msto1	chr3	-	A5SS	Spermatocyte
526	ENSMUSG00000045795	Whamm	chr7	+	A5SS	Spermatocyte
527	ENSMUSG00000025188	Hps1	chr19	-	A5SS	Spermatocyte
528	ENSMUSG00000044465	Fam160a2	chr7	-	A5SS	Spermatocyte
529	ENSMUSG00000036073	Galt	chr4	+	A5SS	Spermatocyte
530	ENSMUSG00000085396	Firre	chrX	-	A5SS	Spermatocyte
531	ENSMUSG00000021476	Habp4	chr13	+	A5SS	Spermatocyte
532	ENSMUSG00000038429	Usp5	chr6	-	A5SS	Spermatocyte
533	ENSMUSG00000026107	Nabp1	chr1	-	A5SS	Spermatocyte
534	ENSMUSG00000035086	Becn1	chr11	-	A5SS	Spermatocyte
535	ENSMUSG00000024012	Mtch1	chr17	-	A5SS	Spermatocyte
536	ENSMUSG00000021288	Klc1	chr12	+	A5SS	Spermatocyte
537	ENSMUSG00000049658	Bdp1	chr13	-	A5SS	Spermatocyte
538	ENSMUSG00000020918	Kat2a	chr11	-	A5SS	Spermatocyte
539	ENSMUSG00000087174	5530601H04Rik	chrX	-	A5SS	Spermatocyte
540	ENSMUSG00000030061	Uba3	chr6	-	A5SS	Spermatocyte
541	ENSMUSG00000063810	Alms1	chr6	+	A5SS	Spermatocyte
542	ENSMUSG00000055296	Tmem245	chr4	-	A5SS	Spermatocyte
543	ENSMUSG00000047284	Neurl4	chr11	+	A5SS	Spermatocyte
544	ENSMUSG00000034858	Fam214a	chr9	+	A5SS	Spermatocyte
545	ENSMUSG00000062963	Ufc1	chr1	-	A5SS	Spermatocyte
546	ENSMUSG00000004319	Clcn3	chr8	-	A5SS	Spermatocyte
547	ENSMUSG00000036980	Taf6	chr5	-	A5SS	Spermatocyte
548	ENSMUSG00000030990	Pgap2	chr7	+	A5SS	Spermatocyte
549	ENSMUSG00000031939	Taf1d	chr9	+	A5SS	Spermatocyte
550	ENSMUSG00000047036	Zfp445	chr9	-	A5SS	Spermatocyte
551	ENSMUSG00000022770	Dlg1	chr16	+	A5SS	Spermatocyte
552	ENSMUSG00000021282	Eif5	chr12	+	A5SS	Spermatocyte
553	ENSMUSG00000062822	4833420G17Rik	chr13	+	A5SS	Spermatocyte
554	ENSMUSG00000037935	Smarce1	chr11	-	A5SS	Spermatocyte
555	ENSMUSG00000032712	2810474O19Rik	chr6	+	A5SS	Spermatocyte
556	ENSMUSG00000004040	Stat3	chr11	-	A5SS	Spermatocyte
557	ENSMUSG00000017264	Exosc10	chr4	+	A5SS	Spermatocyte
558	ENSMUSG00000034303	Ccdc15	chr9	-	A5SS	Spermatocyte
559	ENSMUSG00000037270	4932438A13Rik	chr3	+	A5SS	Spermatocyte
560	ENSMUSG00000074165	Zfp788	chr7	+	A5SS	Spermatocyte
561	ENSMUSG00000005682	Pan2	chr10	+	A5SS	Spermatocyte
562	ENSMUSG00000037364	Srrt	chr5	-	A5SS	Spermatocyte
563	ENSMUSG00000070420	Zscan25	chr5	+	A5SS	Spermatocyte
564	ENSMUSG00000021066	Atl1	chr12	+	A5SS	Spermatocyte
565	ENSMUSG00000033460	Armcx1	chrX	+	A5SS	Spermatocyte
566	ENSMUSG00000027550	Lrrcc1	chr3	+	A5SS	Spermatocyte
567	ENSMUSG00000109324	Prmt1	chr7	-	A5SS	Spermatocyte
568	ENSMUSG00000035215	Lsm7	chr10	-	A5SS	Spermatocyte
569	ENSMUSG00000010608	Rbm25	chr12	+	A5SS	Spermatocyte
570	ENSMUSG00000074129	Rpl13a	chr7	-	A5SS	Spermatocyte
571	ENSMUSG00000108414	Snhg1	chr19	+	A5SS	Spermatocyte
572	ENSMUSG00000018669	Cdk5rap3	chr11	-	A5SS	Spermatocyte
573	ENSMUSG00000026927	Sdccag3	chr2	-	A5SS	Spermatocyte
574	ENSMUSG00000025451	Paip1	chr13	+	A5SS	Spermatocyte
575	ENSMUSG00000032067	Pts	chr9	-	A5SS	Spermatocyte
576	ENSMUSG00000020288	Ahsa2	chr11	-	A5SS	Spermatocyte
577	ENSMUSG00000037376	Trmt6	chr2	-	A5SS	Spermatocyte
578	ENSMUSG00000098950	Gm28036	chr2	-	A5SS	Spermatocyte
579	ENSMUSG00000022704	Qtrt2	chr16	-	A5SS	Spermatocyte
580	ENSMUSG00000011257	Pabpc4	chr4	+	A5SS	Spermatocyte
581	ENSMUSG00000031156	Slc35a2	chrX	+	A5SS	Spermatocyte
582	ENSMUSG00000029267	Mtf2	chr5	+	A5SS	Spermatocyte
583	ENSMUSG00000036792	Mbd5	chr2	+	A5SS	Spermatocyte
584	ENSMUSG00000003923	Tfam	chr10	-	A5SS	Spermatocyte
585	ENSMUSG00000048154	Kmt2d	chr15	-	A5SS	Spermatocyte
586	ENSMUSG00000027411	Vps16	chr2	+	A5SS	Spermatocyte
587	ENSMUSG00000004996	Mri1	chr8	-	A5SS	Spermatocyte
588	ENSMUSG00000026577	Blzf1	chr1	-	A5SS	Spermatocyte
589	ENSMUSG00000021819	Zswim8	chr14	+	A5SS	Spermatocyte
590	ENSMUSG00000005883	Spo11	chr2	+	A5SS	Spermatocyte
591	ENSMUSG00000028394	Pole3	chr4	-	A5SS	Spermatocyte
592	ENSMUSG00000020184	Mdm2	chr10	-	A5SS	Spermatocyte
593	ENSMUSG00000025420	Katnal2	chr18	-	A5SS	Spermatocyte
594	ENSMUSG00000053453	Thoc7	chr14	-	A5SS	Spermatocyte
595	ENSMUSG00000037805	Rpl10a	chr17	+	A5SS	Spermatocyte
596	ENSMUSG00000047193	Dync2h1	chr9	-	A5SS	Spermatocyte
597	ENSMUSG00000062198	2700097O09Rik	chr12	-	A5SS	Spermatocyte
598	ENSMUSG00000060600	Eno3	chr11	+	A5SS	Spermatocyte
599	ENSMUSG00000068329	Htra2	chr6	-	A5SS	Spermatocyte
600	ENSMUSG00000000902	Smarcb1	chr10	-	A5SS	Spermatocyte
601	ENSMUSG00000040785	Ttc3	chr16	+	A5SS	Spermatocyte
602	ENSMUSG00000029060	Mib2	chr4	-	A5SS	Spermatocyte
603	ENSMUSG00000025237	Parp6	chr9	+	A5SS	Spermatocyte
604	ENSMUSG00000026798	Coq4	chr2	+	A5SS	Spermatocyte
605	ENSMUSG00000037363	Letm2	chr8	-	A5SS	Spermatocyte
606	ENSMUSG00000067367	Lyar	chr5	+	A5SS	Spermatocyte
607	ENSMUSG00000026634	Angel2	chr1	+	A5SS	Spermatocyte
608	ENSMUSG00000021235	Coq6	chr12	+	A5SS	Spermatocyte
609	ENSMUSG00000001909	Trmt1	chr8	+	A5SS	Spermatocyte
610	ENSMUSG00000028552	Eps15	chr4	+	A5SS	Spermatocyte
611	ENSMUSG00000038425	Poli	chr18	-	A5SS	Spermatocyte
612	ENSMUSG00000073795	6430531B16Rik	chr7	-	A5SS	Spermatocyte
613	ENSMUSG00000026977	March7	chr2	+	A5SS	Spermatocyte
614	ENSMUSG00000026005	Rpe	chr1	+	A5SS	Spermatocyte
615	ENSMUSG00000038346	Zfp384	chr6	+	A5SS	Spermatocyte
616	ENSMUSG00000030611	Mrps11	chr7	+	A5SS	Spermatocyte
617	ENSMUSG00000054889	Dsp	chr13	+	A5SS	Spermatocyte
618	ENSMUSG00000021893	Capn7	chr14	+	A5SS	Spermatocyte
619	ENSMUSG00000042198	Chchd7	chr4	+	A5SS	Spermatocyte
620	ENSMUSG00000025283	Sat1	chrX	-	A5SS	Spermatocyte
621	ENSMUSG00000032567	Aste1	chr9	+	A5SS	Spermatocyte
622	ENSMUSG00000023467	Tulp2	chr7	+	A5SS	Spermatocyte
623	ENSMUSG00000030057	Cnbp	chr6	-	A5SS	Spermatocyte
624	ENSMUSG00000061136	Prpf40a	chr2	-	A5SS	Spermatocyte
625	ENSMUSG00000060147	Serpinb6a	chr13	-	A5SS	Spermatocyte
626	ENSMUSG00000019822	Smpd2	chr10	-	A5SS	Spermatocyte
627	ENSMUSG00000026113	Inpp4a	chr1	+	A5SS	Spermatocyte
628	ENSMUSG00000020530	Ggnbp2	chr11	-	A5SS	Spermatocyte
629	ENSMUSG00000026349	Ccnt2	chr1	+	A5SS	Spermatocyte
630	ENSMUSG00000019710	Mrpl24	chr3	+	A5SS	Spermatocyte
631	ENSMUSG00000036223	Ska1	chr18	-	A5SS	Spermatocyte
632	ENSMUSG00000032480	Dhx30	chr9	-	A5SS	Spermatocyte
633	ENSMUSG00000031812	Map1lc3b	chr8	+	A5SS	Spermatocyte
634	ENSMUSG00000032115	Hyou1	chr9	+	A5SS	Spermatocyte
635	ENSMUSG00000049659	Aftph	chr11	-	A5SS	Spermatocyte
636	ENSMUSG00000006304	Arpc2	chr1	+	A5SS	Spermatocyte
637	ENSMUSG00000070953	Rabepk	chr2	-	A5SS	Spermatocyte
638	ENSMUSG00000042772	Smg7	chr1	-	A5SS	Spermatocyte
639	ENSMUSG00000024430	Cabyr	chr18	+	A5SS	Spermatocyte
640	ENSMUSG00000026409	Pfkfb2	chr1	-	A5SS	Spermatocyte
641	ENSMUSG00000027284	Cdan1	chr2	-	A5SS	Spermatocyte
642	ENSMUSG00000042726	Trafd1	chr5	-	A5SS	Spermatocyte
643	ENSMUSG00000025980	Hspd1	chr1	-	A5SS	Spermatocyte
644	ENSMUSG00000013155	Enkd1	chr8	-	A5SS	Spermatocyte
645	ENSMUSG00000027951	Adar	chr3	+	A5SS	Spermatocyte
646	ENSMUSG00000035851	Ythdc1	chr5	+	A5SS	Spermatocyte
647	ENSMUSG00000006589	Aprt	chr8	-	A5SS	Spermatocyte
648	ENSMUSG00000059689	Zfp637	chr6	+	A5SS	Spermatocyte
649	ENSMUSG00000006720	Zfp184	chr13	+	A5SS	Spermatocyte
650	ENSMUSG00000013858	Tmem259	chr10	-	A5SS	Spermatocyte
651	ENSMUSG00000039069	Mtg2	chr2	+	A5SS	Spermatocyte
652	ENSMUSG00000078485	Plekhn1	chr4	-	A5SS	Spermatocyte
653	ENSMUSG00000031189	Aff2	chrX	+	A5SS	Spermatocyte
654	ENSMUSG00000071226	Cecr2	chr6	+	A5SS	Spermatocyte
655	ENSMUSG00000032525	Nktr	chr9	+	A5SS	Spermatocyte
656	ENSMUSG00000033799	Fam208b	chr13	-	A5SS	Spermatocyte
657	ENSMUSG00000056608	Chd9	chr8	+	A5SS	Spermatocyte
658	ENSMUSG00000010110	Stx5a	chr19	+	A5SS	Spermatocyte
659	ENSMUSG00000033416	Gucd1	chr10	-	A5SS	Spermatocyte
660	ENSMUSG00000028453	Fancg	chr4	-	A5SS	Spermatocyte
661	ENSMUSG00000037902	Sirpa	chr2	+	A5SS	Spermatocyte
662	ENSMUSG00000031010	Usp9x	chrX	+	A5SS	Spermatocyte
663	ENSMUSG00000032498	Mlh1	chr9	-	A5SS	Spermatocyte
664	ENSMUSG00000020260	Pofut2	chr10	+	A5SS	Spermatocyte
665	ENSMUSG00000028218	Fam92a	chr4	-	A5SS	Spermatocyte
666	ENSMUSG00000029062	Cdk11b	chr4	+	A5SS	Spermatocyte
667	ENSMUSG00000004846	Plod3	chr5	+	A5SS	Spermatocyte
668	ENSMUSG00000028248	Pnisr	chr4	+	A5SS	Spermatocyte
669	ENSMUSG00000028797	Tmem234	chr4	+	A5SS	Spermatocyte
670	ENSMUSG00000019518	Ap4m1	chr5	+	A5SS	Spermatocyte
671	ENSMUSG00000043019	Edem3	chr1	+	A5SS	Spermatocyte
672	ENSMUSG00000025236	Adpgk	chr9	+	A5SS	Spermatocyte
673	ENSMUSG00000048100	Taf13	chr3	+	A5SS	Spermatocyte
674	ENSMUSG00000023861	Mpc1	chr17	+	A5SS	Spermatocyte
675	ENSMUSG00000030409	Dmpk	chr7	+	A5SS	Spermatocyte
676	ENSMUSG00000028295	Smim8	chr4	-	A5SS	Spermatocyte
677	ENSMUSG00000045466	Zfp956	chr6	+	A5SS	Spermatocyte
678	ENSMUSG00000022702	Hira	chr16	+	A5SS	Spermatocyte
679	ENSMUSG00000028468	Rgp1	chr4	+	A5SS	Spermatocyte
680	ENSMUSG00000034175	Rhbdd3	chr11	+	A5SS	Spermatocyte
681	ENSMUSG00000046711	Hmga1	chr17	+	A5SS	Spermatocyte
682	ENSMUSG00000020472	Zkscan17	chr11	-	A5SS	Spermatocyte
683	ENSMUSG00000053332	Gas5	chr1	+	A5SS	Spermatocyte
684	ENSMUSG00000051811	Cox6b2	chr7	-	A5SS	Spermatocyte
685	ENSMUSG00000029020	Mfn2	chr4	-	A5SS	Spermatocyte
686	ENSMUSG00000022788	Fgd4	chr16	-	A5SS	Spermatocyte
687	ENSMUSG00000061288	Taok3	chr5	+	A5SS	Spermatocyte
688	ENSMUSG00000031634	Ufsp2	chr8	+	A5SS	Spermatocyte
689	ENSMUSG00000020290	Xpo1	chr11	+	A5SS	Spermatocyte
690	ENSMUSG00000039205	Ciz1	chr2	+	A5SS	Spermatocyte
691	ENSMUSG00000026319	2310035C23Rik	chr1	+	A5SS	Spermatocyte
692	ENSMUSG00000057335	Cep170	chr1	-	A5SS	Spermatocyte
693	ENSMUSG00000022621	Rabl2	chr15	-	A5SS	Spermatocyte
694	ENSMUSG00000021820	Camk2g	chr14	-	A5SS	Spermatocyte
695	ENSMUSG00000073468	Sft2d1	chr17	+	A5SS	Spermatocyte
696	ENSMUSG00000036377	C530008M17Rik	chr5	+	A5SS	Spermatocyte
697	ENSMUSG00000014418	Hps5	chr7	-	A5SS	Spermatocyte
698	ENSMUSG00000005262	Ufd1	chr16	+	A5SS	Spermatocyte
699	ENSMUSG00000097145	9230114K14Rik	chr5	+	A5SS	Spermatocyte
700	ENSMUSG00000031818	Cox4i1	chr8	+	A5SS	Spermatocyte
701	ENSMUSG00000030330	Ing4	chr6	+	A5SS	Spermatocyte
702	ENSMUSG00000038056	Kmt2c	chr5	-	A5SS	Spermatocyte
703	ENSMUSG00000030213	Atf7ip	chr6	+	A5SS	Spermatocyte
704	ENSMUSG00000032280	Tle3	chr9	+	A5SS	Spermatocyte
705	ENSMUSG00000051786	Tubgcp6	chr15	-	A5SS	Spermatocyte
706	ENSMUSG00000054405	Dnajc8	chr4	+	A5SS	Spermatocyte
707	ENSMUSG00000005763	Cd247	chr1	+	A5SS	Spermatocyte
708	ENSMUSG00000040782	Rfwd2	chr1	+	A5SS	Spermatocyte
709	ENSMUSG00000034729	Mrps10	chr17	+	A5SS	Spermatocyte
710	ENSMUSG00000021668	Polk	chr13	-	A5SS	Spermatocyte
711	ENSMUSG00000005417	Mprip	chr11	+	A5SS	Spermatocyte
712	ENSMUSG00000017307	Acot8	chr2	-	A5SS	Spermatocyte
713	ENSMUSG00000026104	Stat1	chr1	+	A5SS	Spermatocyte
714	ENSMUSG00000023286	Ube2j2	chr4	+	A5SS	Spermatocyte
715	ENSMUSG00000063882	Uqcrh	chr4	-	A5SS	Spermatocyte
716	ENSMUSG00000056962	Jmjd6	chr11	-	A5SS	Spermatocyte
717	ENSMUSG00000028796	Phc2	chr4	+	A5SS	Spermatocyte
718	ENSMUSG00000037326	Capn15	chr17	-	A5SS	Spermatocyte
719	ENSMUSG00000044906	4930503L19Rik	chr18	-	A5SS	Spermatocyte
720	ENSMUSG00000028601	Echdc2	chr4	+	A5SS	Spermatocyte
721	ENSMUSG00000085385	Snhg17	chr2	-	A5SS	Spermatocyte
722	ENSMUSG00000031099	Smarca1	chrX	-	A5SS	Spermatocyte
723	ENSMUSG00000032482	Cspg5	chr9	+	A5SS	Spermatocyte
724	ENSMUSG00000058550	Dppa4	chr16	+	A5SS	Spermatocyte
725	ENSMUSG00000034684	Sema3f	chr9	-	A5SS	Spermatocyte
726	ENSMUSG00000031708	Tecr	chr8	-	A5SS	Spermatocyte
727	ENSMUSG00000037103	Dcaf15	chr8	-	A5SS	Spermatocyte
728	ENSMUSG00000047767	Atg16l2	chr7	-	A5SS	Spermatocyte
729	ENSMUSG00000021830	Txndc16	chr14	-	A5SS	Spermatocyte
730	ENSMUSG00000003808	Farsa	chr8	+	A5SS	Spermatocyte
731	ENSMUSG00000041147	Brca2	chr5	+	A5SS	Spermatocyte
732	ENSMUSG00000059439	Bcas3	chr11	+	A5SS	Spermatocyte
733	ENSMUSG00000039458	Mtmr12	chr15	+	A5SS	Spermatocyte
734	ENSMUSG00000024037	Wdr4	chr17	-	A5SS	Spermatocyte
735	ENSMUSG00000021115	Vrk1	chr12	+	A5SS	Spermatocyte
736	ENSMUSG00000046897	Zfp740	chr15	+	A5SS	Spermatocyte
737	ENSMUSG00000059540	Tcea2	chr2	+	A5SS	Spermatocyte
738	ENSMUSG00000022641	Bbx	chr16	-	A5SS	Spermatocyte
739	ENSMUSG00000040687	Madd	chr2	-	A5SS	Spermatocyte
740	ENSMUSG00000000561	Wdr77	chr3	+	A5SS	Spermatocyte
741	ENSMUSG00000023007	Prpf40b	chr15	+	A5SS	Spermatocyte
742	ENSMUSG00000097589	Dleu2	chr14	-	A5SS	Spermatocyte
743	ENSMUSG00000001143	Lman2l	chr1	-	A5SS	Spermatocyte
744	ENSMUSG00000040928	S100pbp	chr4	-	A5SS	Spermatocyte
745	ENSMUSG00000022992	Kansl2	chr15	-	A5SS	Spermatocyte
746	ENSMUSG00000054823	Nsd3	chr8	+	A5SS	Spermatocyte
747	ENSMUSG00000042520	Ubap2l	chr3	-	A5SS	Spermatocyte
748	ENSMUSG00000027944	Hax1	chr3	-	A5SS	Spermatocyte
749	ENSMUSG00000030815	Phkg2	chr7	+	A5SS	Spermatocyte
750	ENSMUSG00000109378	U2af1l4	chr7	+	A5SS	Spermatocyte
751	ENSMUSG00000022948	Setd4	chr16	-	A5SS	Spermatocyte
752	ENSMUSG00000002221	Paxip1	chr5	-	A5SS	Spermatocyte
753	ENSMUSG00000026694	Mettl13	chr1	-	A5SS	Spermatocyte
754	ENSMUSG00000033543	Gtf2a2	chr9	+	A5SS	Spermatocyte
755	ENSMUSG00000011658	Fuz	chr7	+	A5SS	Spermatocyte
756	ENSMUSG00000007833	Aldh16a1	chr7	-	A5SS	Spermatocyte
757	ENSMUSG00000049550	Clip1	chr5	-	A5SS	Spermatocyte
758	ENSMUSG00000030733	Sh2b1	chr7	-	A5SS	Spermatocyte
759	ENSMUSG00000068882	Ssb	chr2	+	A5SS	Spermatocyte
760	ENSMUSG00000000131	Xpo6	chr7	-	A5SS	Spermatocyte
761	ENSMUSG00000038013	Wipf2	chr11	+	A5SS	Spermatocyte
762	ENSMUSG00000022789	Dnm1l	chr16	-	A5SS	Spermatocyte
763	ENSMUSG00000031556	Tm2d2	chr8	+	A5SS	Spermatocyte
764	ENSMUSG00000062729	Ppox	chr1	-	A5SS	Spermatocyte
765	ENSMUSG00000036078	Sigmar1	chr4	-	A5SS	Spermatocyte
766	ENSMUSG00000004568	Arhgef18	chr8	+	A5SS	Spermatocyte
767	ENSMUSG00000024293	Esco1	chr18	-	A5SS	Spermatocyte
768	ENSMUSG00000041594	Tmtc4	chr14	-	A5SS	Spermatocyte
769	ENSMUSG00000039087	Rreb1	chr13	+	A5SS	Spermatocyte
770	ENSMUSG00000031832	Taf1c	chr8	-	A5SS	Spermatocyte
771	ENSMUSG00000028047	Thbs3	chr3	+	A5SS	Spermatocyte
772	ENSMUSG00000014767	Tbp	chr17	+	A5SS	Spermatocyte
773	ENSMUSG00000021139	Gm20498	chr12	-	A5SS	Spermatocyte
774	ENSMUSG00000041328	Pcf11	chr7	-	A5SS	Spermatocyte
775	ENSMUSG00000029687	Ezh2	chr6	-	A5SS	Spermatocyte
776	ENSMUSG00000023235	Ccl25	chr8	+	A5SS	Spermatocyte
777	ENSMUSG00000020572	Nampt	chr12	+	A5SS	Spermatocyte
778	ENSMUSG00000075703	Selenoi	chr5	+	A5SS	Spermatocyte
779	ENSMUSG00000004661	Arid3b	chr9	-	A5SS	Spermatocyte
780	ENSMUSG00000064284	Cdpf1	chr15	-	A5SS	Spermatocyte
781	ENSMUSG00000039176	Polg	chr7	-	A5SS	Spermatocyte
782	ENSMUSG00000041763	Tpp2	chr1	+	A5SS	Spermatocyte
783	ENSMUSG00000071657	Bscl2	chr19	+	A5SS	Spermatocyte
784	ENSMUSG00000002797	Ggct	chr6	-	A5SS	Spermatocyte
785	ENSMUSG00000028312	Smc2	chr4	+	A5SS	Spermatocyte
786	ENSMUSG00000020069	Hnrnph3	chr10	-	A5SS	Spermatocyte
787	ENSMUSG00000006289	Osgep	chr14	-	A5SS	Spermatocyte
788	ENSMUSG00000052752	Traf7	chr17	-	A5SS	Spermatocyte
789	ENSMUSG00000030104	Edem1	chr6	+	A5SS	Spermatocyte
790	ENSMUSG00000038777	Sema6c	chr3	+	A5SS	Spermatocyte
791	ENSMUSG00000007411	Mark3	chr12	+	A5SS	Spermatocyte
792	ENSMUSG00000040690	Col16a1	chr4	+	A5SS	Spermatocyte
793	ENSMUSG00000024943	Smc5	chr19	-	A5SS	Spermatocyte
794	ENSMUSG00000025147	Mob2	chr7	-	A5SS	Spermatocyte
795	ENSMUSG00000020659	Cbll1	chr12	-	A5SS	Spermatocyte
796	ENSMUSG00000042744	Hectd4	chr5	+	A5SS	Spermatocyte
797	ENSMUSG00000039354	Smarcal1	chr1	+	A5SS	Spermatocyte
798	ENSMUSG00000026790	Odf2	chr2	+	A5SS	Spermatocyte
799	ENSMUSG00000028677	Rnf220	chr4	-	A5SS	Spermatocyte
800	ENSMUSG00000027405	Nop56	chr2	+	A5SS	Spermatocyte
801	ENSMUSG00000039463	Slc9a8	chr2	+	A5SS	Spermatocyte
802	ENSMUSG00000037475	Thoc2	chrX	-	A5SS	Spermatocyte
803	ENSMUSG00000028107	Tars2	chr3	-	A5SS	Spermatocyte
804	ENSMUSG00000026987	Baz2b	chr2	-	A5SS	Spermatocyte
805	ENSMUSG00000035597	Prpf39	chr12	+	A5SS	Spermatocyte
806	ENSMUSG00000070424	Art5	chr7	-	A5SS	Spermatocyte
807	ENSMUSG00000001034	Mapk7	chr11	-	A5SS	Spermatocyte
808	ENSMUSG00000053819	Camk2d	chr3	+	A5SS	Spermatocyte
809	ENSMUSG00000033961	Zfp446	chr7	+	A5SS	Spermatocyte
810	ENSMUSG00000022843	Clcn2	chr16	-	A5SS	Spermatocyte
811	ENSMUSG00000022377	Asap1	chr15	-	A5SS	Spermatocyte
812	ENSMUSG00000027829	Ccnl1	chr3	-	A5SS	Spermatocyte
813	ENSMUSG00000021134	Srsf5	chr12	+	A5SS	Spermatocyte
814	ENSMUSG00000018501	Ncor1	chr11	-	A5SS	Spermatocyte
815	ENSMUSG00000066894	Vsig10	chr5	+	A5SS	Spermatocyte
816	ENSMUSG00000032316	Clk3	chr9	-	A5SS	Spermatocyte
817	ENSMUSG00000024220	Zfp523	chr17	+	A5SS	Spermatocyte
818	ENSMUSG00000032641	Gpr19	chr6	-	A5SS	Spermatocyte
819	ENSMUSG00000038828	Tmem214	chr5	+	A5SS	Spermatocyte
820	ENSMUSG00000034211	Mrps17	chr5	+	A5SS	Spermatocyte
821	ENSMUSG00000012609	Ttll5	chr12	+	A5SS	Spermatocyte
822	ENSMUSG00000034248	Slc25a37	chr14	-	A5SS	Spermatocyte
823	ENSMUSG00000033918	Parl	chr16	-	A5SS	Spermatocyte
824	ENSMUSG00000006335	Tfpt	chr7	-	A5SS	Spermatocyte
825	ENSMUSG00000040813	Tex264	chr9	-	A5SS	Spermatocyte
826	ENSMUSG00000029034	Ints11	chr4	+	A5SS	Spermatocyte
827	ENSMUSG00000020818	Mfsd11	chr11	+	A5SS	Spermatocyte
828	ENSMUSG00000027881	Prpf38b	chr3	-	A5SS	Spermatocyte
829	ENSMUSG00000007050	Lsm2	chr17	+	A5SS	Spermatocyte
830	ENSMUSG00000043510	Hscb	chr5	-	A5SS	Spermatocyte
831	ENSMUSG00000000148	Brat1	chr5	+	A5SS	Spermatocyte
832	ENSMUSG00000073433	Arhgdig	chr17	-	A5SS	Spermatocyte
833	ENSMUSG00000052609	Plekhg3	chr12	+	A5SS	Spermatocyte
834	ENSMUSG00000066456	Hmgn3	chr9	-	A5SS	Spermatocyte
835	ENSMUSG00000000916	Nsun5	chr5	+	A5SS	Spermatocyte
836	ENSMUSG00000031381	Piga	chrX	+	A5SS	Spermatocyte
837	ENSMUSG00000001289	Pfdn5	chr15	+	A5SS	Spermatocyte
838	ENSMUSG00000001248	Gramd1a	chr7	-	A5SS	Spermatocyte
839	ENSMUSG00000049482	Ctu2	chr8	+	A5SS	Spermatocyte
840	ENSMUSG00000026867	Gapvd1	chr2	-	A5SS	Spermatocyte
841	ENSMUSG00000037971	1110032A03Rik	chr9	-	A5SS	Spermatocyte
842	ENSMUSG00000036411	9530077C05Rik	chr9	+	A5SS	Spermatocyte
843	ENSMUSG00000038722	Bud31	chr5	+	A5SS	Spermatocyte
844	ENSMUSG00000003161	Sri	chr5	+	A5SS	Spermatocyte
845	ENSMUSG00000022864	D16Ertd472e	chr16	-	A5SS	Spermatocyte
846	ENSMUSG00000037846	Rtkn2	chr10	+	A5SS	Spermatocyte
847	ENSMUSG00000069631	Strada	chr11	-	A5SS	Spermatocyte
848	ENSMUSG00000030759	Far1	chr7	+	A5SS	Spermatocyte
849	ENSMUSG00000031570	Plpp5	chr8	+	A5SS	Spermatocyte
850	ENSMUSG00000005893	Nr2c2	chr6	+	A5SS	Spermatocyte
851	ENSMUSG00000063108	Zfp26	chr9	-	A5SS	Spermatocyte
852	ENSMUSG00000032336	Nptn	chr9	+	A5SS	Spermatocyte
853	ENSMUSG00000036054	Sugp2	chr8	+	A5SS	Spermatocyte
854	ENSMUSG00000029454	Mapkapk5	chr5	-	A5SS	Spermatocyte
855	ENSMUSG00000027660	Skil	chr3	+	A5SS	Spermatocyte
856	ENSMUSG00000063511	Snrnp70	chr7	-	A5SS	Spermatocyte
857	ENSMUSG00000032745	Gpbp1	chr13	-	A5SS	Spermatocyte
858	ENSMUSG00000027425	Kat14	chr2	+	A5SS	Spermatocyte
859	ENSMUSG00000020770	Unk	chr11	+	A5SS	Spermatocyte
860	ENSMUSG00000029502	Golga3	chr5	+	A5SS	Spermatocyte
861	ENSMUSG00000015087	Rabl6	chr2	-	A5SS	Spermatocyte
862	ENSMUSG00000030322	Mbd4	chr6	-	A5SS	Spermatocyte
863	ENSMUSG00000062929	Cfl2	chr12	-	A5SS	Spermatocyte
864	ENSMUSG00000047731	Wbp1l	chr19	+	A5SS	Spermatocyte
865	ENSMUSG00000025915	Sgk3	chr1	+	A5SS	Spermatocyte
866	ENSMUSG00000030960	Eef1akmt2	chr7	-	A5SS	Spermatocyte
867	ENSMUSG00000041528	Rnf123	chr9	-	A5SS	Spermatocyte
868	ENSMUSG00000022961	Son	chr16	+	A5SS	Spermatocyte
869	ENSMUSG00000029098	Acox3	chr5	+	A5SS	Spermatocyte
870	ENSMUSG00000078350	Smim1	chr4	-	A5SS	Spermatocyte
871	ENSMUSG00000057894	Zfp329	chr7	-	A5SS	Spermatocyte
872	ENSMUSG00000038708	Golga4	chr9	+	MXE	Spermatocyte
873	ENSMUSG00000038174	Fam126b	chr1	-	MXE	Spermatocyte
874	ENSMUSG00000019936	Epyc	chr10	+	MXE	Spermatocyte
875	ENSMUSG00000021629	Slc30a5	chr13	-	MXE	Spermatocyte
876	ENSMUSG00000018697	Aatf	chr11	-	MXE	Spermatocyte
877	ENSMUSG00000002372	Ranbp3	chr17	+	MXE	Spermatocyte
878	ENSMUSG00000066026	Dhrs3	chr4	+	MXE	Spermatocyte
879	ENSMUSG00000038388	Mpp6	chr6	+	MXE	Spermatocyte
880	ENSMUSG00000022617	Chkb	chr15	-	MXE	Spermatocyte
881	ENSMUSG00000036138	Acaa1a	chr9	+	MXE	Spermatocyte
882	ENSMUSG00000008690	Ncaph2	chr15	+	MXE	Spermatocyte
883	ENSMUSG00000038914	Dido1	chr2	-	MXE	Spermatocyte
884	ENSMUSG00000022092	Ppp3cc	chr14	-	MXE	Spermatocyte
885	ENSMUSG00000052812	Atad2b	chr12	+	MXE	Spermatocyte
886	ENSMUSG00000000399	Ndufa9	chr6	-	MXE	Spermatocyte
887	ENSMUSG00000022884	Eif4a2	chr16	+	MXE	Spermatocyte
888	ENSMUSG00000041890	Git2	chr5	-	MXE	Spermatocyte
889	ENSMUSG00000032952	Ap4b1	chr3	+	MXE	Spermatocyte
890	ENSMUSG00000030562	Nox4	chr7	+	MXE	Spermatocyte
891	ENSMUSG00000046364	Rpl27a	chr7	+	MXE	Spermatocyte
892	ENSMUSG00000032553	Srprb	chr9	-	MXE	Spermatocyte
893	ENSMUSG00000017978	Cadps2	chr6	-	MXE	Spermatocyte
894	ENSMUSG00000036529	Sbf1	chr15	-	MXE	Spermatocyte
895	ENSMUSG00000051378	Kif18b	chr11	-	MXE	Spermatocyte
896	ENSMUSG00000063145	Bbs5	chr2	+	MXE	Spermatocyte
897	ENSMUSG00000020882	Cacnb1	chr11	-	MXE	Spermatocyte
898	ENSMUSG00000022964	Tmem50b	chr16	-	MXE	Spermatocyte
899	ENSMUSG00000043940	Wdfy3	chr5	-	MXE	Spermatocyte
900	ENSMUSG00000026782	Abi2	chr1	+	MXE	Spermatocyte
901	ENSMUSG00000018412	Kansl1	chr11	-	MXE	Spermatocyte
902	ENSMUSG00000026879	Gsn	chr2	+	MXE	Spermatocyte
903	ENSMUSG00000026159	Agfg1	chr1	+	MXE	Spermatocyte
904	ENSMUSG00000020521	Rnft1	chr11	+	MXE	Spermatocyte
905	ENSMUSG00000020740	Gga3	chr11	-	MXE	Spermatocyte
906	ENSMUSG00000032307	Ube2q2	chr9	+	MXE	Spermatocyte
907	ENSMUSG00000022620	Arsa	chr15	-	MXE	Spermatocyte
908	ENSMUSG00000032366	Tpm1	chr9	-	MXE	Spermatocyte
909	ENSMUSG00000061477	Rps7	chr12	-	MXE	Spermatocyte
910	ENSMUSG00000022515	Anks3	chr16	-	MXE	Spermatocyte
911	ENSMUSG00000030357	Fkbp4	chr6	-	MXE	Spermatocyte
912	ENSMUSG00000038954	Supt3	chr17	+	MXE	Spermatocyte
913	ENSMUSG00000004455	Ppp1cc	chr5	+	MXE	Spermatocyte
914	ENSMUSG00000029922	Mkrn1	chr6	-	MXE	Spermatocyte
915	ENSMUSG00000029505	Ep400	chr5	-	MXE	Spermatocyte
916	ENSMUSG00000038685	Rtel1	chr2	+	MXE	Spermatocyte
917	ENSMUSG00000052707	Tnrc6a	chr7	+	MXE	Spermatocyte
918	ENSMUSG00000024006	Stk38	chr17	-	MXE	Spermatocyte
919	ENSMUSG00000039703	Nploc4	chr11	-	MXE	Spermatocyte
920	ENSMUSG00000028792	Ak2	chr4	+	MXE	Spermatocyte
921	ENSMUSG00000049288	Lix1l	chr3	+	MXE	Spermatocyte
922	ENSMUSG00000014932	Yes1	chr5	+	MXE	Spermatocyte
923	ENSMUSG00000037669	Ldah	chr12	+	MXE	Spermatocyte
924	ENSMUSG00000028416	Bag1	chr4	-	MXE	Spermatocyte
925	ENSMUSG00000039530	Tusc3	chr8	+	MXE	Spermatocyte
926	ENSMUSG00000041431	Ccnb1	chr13	-	MXE	Spermatocyte
927	ENSMUSG00000079557	March2	chr17	-	MXE	Spermatocyte
928	ENSMUSG00000024107	Lhcgr	chr17	-	MXE	Spermatocyte
929	ENSMUSG00000026196	Bard1	chr1	-	MXE	Spermatocyte
930	ENSMUSG00000090626	Tex9	chr9	-	MXE	Spermatocyte
931	ENSMUSG00000026553	Copa	chr1	+	MXE	Spermatocyte
932	ENSMUSG00000038696	Mapkap1	chr2	+	MXE	Spermatocyte
933	ENSMUSG00000019188	H13	chr2	+	MXE	Spermatocyte
934	ENSMUSG00000000339	Rtca	chr3	-	MXE	Spermatocyte
935	ENSMUSG00000024921	Smarca2	chr19	+	MXE	Spermatocyte
936	ENSMUSG00000074673	Ttll9	chr2	+	MXE	Spermatocyte
937	ENSMUSG00000089837	Npcd	chr15	-	MXE	Spermatocyte
938	ENSMUSG00000069855	Slc47a2	chr11	-	MXE	Spermatocyte
939	ENSMUSG00000029767	Calu	chr6	+	MXE	Spermatocyte
940	ENSMUSG00000015869	Prpsap1	chr11	-	MXE	Spermatocyte
941	ENSMUSG00000028692	Akr1a1	chr4	-	MXE	Spermatocyte
942	ENSMUSG00000008976	Gabpa	chr16	+	MXE	Spermatocyte
943	ENSMUSG00000019916	P4ha1	chr10	+	MXE	Spermatocyte
944	ENSMUSG00000021697	Depdc1b	chr13	+	MXE	Spermatocyte
945	ENSMUSG00000022771	Ppil2	chr16	-	MXE	Spermatocyte
946	ENSMUSG00000020634	Ubxn2a	chr12	-	MXE	Spermatocyte
947	ENSMUSG00000035232	Pdk3	chrX	-	MXE	Spermatocyte
948	ENSMUSG00000022779	Top3b	chr16	+	MXE	Spermatocyte
949	ENSMUSG00000029769	Ccdc136	chr6	+	MXE	Spermatocyte
950	ENSMUSG00000028476	Reck	chr4	+	MXE	Spermatocyte
951	ENSMUSG00000030067	Foxp1	chr6	-	MXE	Spermatocyte
952	ENSMUSG00000063889	Crem	chr18	-	MXE	Spermatocyte
953	ENSMUSG00000026240	Cops7b	chr1	+	MXE	Spermatocyte
954	ENSMUSG00000020716	Nf1	chr11	+	MXE	Spermatocyte
955	ENSMUSG00000060450	Rnf14	chr18	+	MXE	Spermatocyte
956	ENSMUSG00000042831	Alkbh6	chr7	+	MXE	Spermatocyte
957	ENSMUSG00000020755	Sap30bp	chr11	+	MXE	Spermatocyte
958	ENSMUSG00000034544	Rsrc1	chr3	+	MXE	Spermatocyte
959	ENSMUSG00000078515	Ddi2	chr4	-	MXE	Spermatocyte
960	ENSMUSG00000030007	Cct7	chr6	+	MXE	Spermatocyte
961	ENSMUSG00000098789	Jmjd7	chr2	+	MXE	Spermatocyte
962	ENSMUSG00000071064	Zfp827	chr8	+	MXE	Spermatocyte
963	ENSMUSG00000032381	Fam96a	chr9	+	MXE	Spermatocyte
964	ENSMUSG00000027185	Nat10	chr2	-	MXE	Spermatocyte
965	ENSMUSG00000041921	Metap1d	chr2	+	MXE	Spermatocyte
966	ENSMUSG00000034832	Tet3	chr6	-	MXE	Spermatocyte
967	ENSMUSG00000024135	Srbd1	chr17	-	MXE	Spermatocyte
968	ENSMUSG00000002068	Ccne1	chr7	-	MXE	Spermatocyte
969	ENSMUSG00000033257	Ttll4	chr1	+	MXE	Spermatocyte
970	ENSMUSG00000002963	Pnkp	chr7	+	MXE	Spermatocyte
971	ENSMUSG00000045983	Eif4g1	chr16	+	MXE	Spermatocyte
972	ENSMUSG00000040029	Ipo8	chr6	-	MXE	Spermatocyte
973	ENSMUSG00000022012	Enox1	chr14	+	MXE	Spermatocyte
974	ENSMUSG00000021144	Mta1	chr12	+	MXE	Spermatocyte
975	ENSMUSG00000000296	Tpd52l1	chr10	-	MXE	Spermatocyte
976	ENSMUSG00000034126	Pomt2	chr12	-	MXE	Spermatocyte
977	ENSMUSG00000005610	Eif4g2	chr7	-	MXE	Spermatocyte
978	ENSMUSG00000000708	Kat2b	chr17	+	MXE	Spermatocyte
979	ENSMUSG00000039523	Cep104	chr4	+	MXE	Spermatocyte
980	ENSMUSG00000027298	Tyro3	chr2	+	MXE	Spermatocyte
981	ENSMUSG00000003528	Slc25a1	chr16	-	MXE	Spermatocyte
982	ENSMUSG00000024908	Ppp6r3	chr19	-	MXE	Spermatocyte
983	ENSMUSG00000061887	Ssbp3	chr4	+	MXE	Spermatocyte
984	ENSMUSG00000035086	Becn1	chr11	-	MXE	Spermatocyte
985	ENSMUSG00000051669	AU021092	chr16	-	MXE	Spermatocyte
986	ENSMUSG00000032637	Atxn2l	chr7	-	MXE	Spermatocyte
987	ENSMUSG00000025871	4833439L19Rik	chr13	-	MXE	Spermatocyte
988	ENSMUSG00000021196	Pfkp	chr13	-	MXE	Spermatocyte
989	ENSMUSG00000021288	Klc1	chr12	+	MXE	Spermatocyte
990	ENSMUSG00000037149	Ddx1	chr12	-	MXE	Spermatocyte
991	ENSMUSG00000040040	Ift88	chr14	+	MXE	Spermatocyte
992	ENSMUSG00000021782	Dlg5	chr14	-	MXE	Spermatocyte
993	ENSMUSG00000052139	Babam2	chr5	+	MXE	Spermatocyte
994	ENSMUSG00000028549	Itgb3bp	chr4	-	MXE	Spermatocyte
995	ENSMUSG00000025487	Psmd13	chr7	+	MXE	Spermatocyte
996	ENSMUSG00000057110	Cntrl	chr2	+	MXE	Spermatocyte
997	ENSMUSG00000027306	Nusap1	chr2	+	MXE	Spermatocyte
998	ENSMUSG00000035126	Wdr78	chr4	-	MXE	Spermatocyte
999	ENSMUSG00000015937	H2afy	chr13	-	MXE	Spermatocyte
1000	ENSMUSG00000035236	Scai	chr2	-	MXE	Spermatocyte
1001	ENSMUSG00000024132	Eci1	chr17	+	MXE	Spermatocyte
1002	ENSMUSG00000053279	Aldh1a1	chr19	+	MXE	Spermatocyte
1003	ENSMUSG00000030061	Uba3	chr6	-	MXE	Spermatocyte
1004	ENSMUSG00000005873	Reep5	chr18	-	MXE	Spermatocyte
1005	ENSMUSG00000032534	Cep63	chr9	-	MXE	Spermatocyte
1006	ENSMUSG00000052798	Nup107	chr10	-	MXE	Spermatocyte
1007	ENSMUSG00000026134	Prim2	chr1	-	MXE	Spermatocyte
1008	ENSMUSG00000003421	Nosip	chr7	+	MXE	Spermatocyte
1009	ENSMUSG00000040473	Cfap69	chr5	-	MXE	Spermatocyte
1010	ENSMUSG00000035297	Cops4	chr5	+	MXE	Spermatocyte
1011	ENSMUSG00000020898	Ctc1	chr11	+	MXE	Spermatocyte
1012	ENSMUSG00000063273	Naa15	chr3	+	MXE	Spermatocyte
1013	ENSMUSG00000037572	Wdhd1	chr14	-	MXE	Spermatocyte
1014	ENSMUSG00000032855	Pkd1	chr17	+	MXE	Spermatocyte
1015	ENSMUSG00000047454	Gphn	chr12	+	MXE	Spermatocyte
1016	ENSMUSG00000038371	Sbf2	chr7	-	MXE	Spermatocyte
1017	ENSMUSG00000026669	Mcm10	chr2	-	MXE	Spermatocyte
1018	ENSMUSG00000005656	Snx6	chr12	-	MXE	Spermatocyte
1019	ENSMUSG00000013662	Atad1	chr19	-	MXE	Spermatocyte
1020	ENSMUSG00000040760	Appl1	chr14	-	MXE	Spermatocyte
1021	ENSMUSG00000038290	Smg6	chr11	+	MXE	Spermatocyte
1022	ENSMUSG00000022141	Nipbl	chr15	-	MXE	Spermatocyte
1023	ENSMUSG00000022391	Rangap1	chr15	-	MXE	Spermatocyte
1024	ENSMUSG00000040481	Bptf	chr11	-	MXE	Spermatocyte
1025	ENSMUSG00000024294	Mib1	chr18	+	MXE	Spermatocyte
1026	ENSMUSG00000025495	Ptdss2	chr7	+	MXE	Spermatocyte
1027	ENSMUSG00000059119	Nap1l4	chr7	-	MXE	Spermatocyte
1028	ENSMUSG00000042167	Papd4	chr13	-	MXE	Spermatocyte
1029	ENSMUSG00000020525	Ppm1d	chr11	+	MXE	Spermatocyte
1030	ENSMUSG00000022283	Pabpc1	chr15	-	MXE	Spermatocyte
1031	ENSMUSG00000030990	Pgap2	chr7	+	MXE	Spermatocyte
1032	ENSMUSG00000029345	Tfip11	chr5	+	MXE	Spermatocyte
1033	ENSMUSG00000035901	Dennd5a	chr7	-	MXE	Spermatocyte
1034	ENSMUSG00000030424	Zfp939	chr7	+	MXE	Spermatocyte
1035	ENSMUSG00000026942	Traf2	chr2	-	MXE	Spermatocyte
1036	ENSMUSG00000028245	Nsmaf	chr4	-	MXE	Spermatocyte
1037	ENSMUSG00000013878	Rnf170	chr8	+	MXE	Spermatocyte
1038	ENSMUSG00000022536	Glyr1	chr16	-	MXE	Spermatocyte
1039	ENSMUSG00000040263	Klhdc4	chr8	-	MXE	Spermatocyte
1040	ENSMUSG00000041815	Poldip3	chr15	-	MXE	Spermatocyte
1041	ENSMUSG00000064215	Ifi27	chr12	+	MXE	Spermatocyte
1042	ENSMUSG00000018554	Ybx2	chr11	+	MXE	Spermatocyte
1043	ENSMUSG00000036693	Nop14	chr5	-	MXE	Spermatocyte
1044	ENSMUSG00000022770	Dlg1	chr16	+	MXE	Spermatocyte
1045	ENSMUSG00000031255	Sytl4	chrX	-	MXE	Spermatocyte
1046	ENSMUSG00000021282	Eif5	chr12	+	MXE	Spermatocyte
1047	ENSMUSG00000005362	Crbn	chr6	-	MXE	Spermatocyte
1048	ENSMUSG00000020978	Klhdc2	chr12	+	MXE	Spermatocyte
1049	ENSMUSG00000029534	St7	chr6	+	MXE	Spermatocyte
1050	ENSMUSG00000034820	Cpsf7	chr19	+	MXE	Spermatocyte
1051	ENSMUSG00000018363	Smurf2	chr11	-	MXE	Spermatocyte
1052	ENSMUSG00000053291	Rab4b	chr7	-	MXE	Spermatocyte
1053	ENSMUSG00000028842	Ago3	chr4	-	MXE	Spermatocyte
1054	ENSMUSG00000021072	Tmx1	chr12	+	MXE	Spermatocyte
1055	ENSMUSG00000023942	Slc29a1	chr17	-	MXE	Spermatocyte
1056	ENSMUSG00000027569	Mrgbp	chr2	+	MXE	Spermatocyte
1057	ENSMUSG00000023883	Phf10	chr17	-	MXE	Spermatocyte
1058	ENSMUSG00000028700	Pomgnt1	chr4	+	MXE	Spermatocyte
1059	ENSMUSG00000064127	Med14	chrX	-	MXE	Spermatocyte
1060	ENSMUSG00000003731	Kpna6	chr4	-	MXE	Spermatocyte
1061	ENSMUSG00000044566	Cage1	chr13	-	MXE	Spermatocyte
1062	ENSMUSG00000052681	Rap1b	chr10	-	MXE	Spermatocyte
1063	ENSMUSG00000017264	Exosc10	chr4	+	MXE	Spermatocyte
1064	ENSMUSG00000021114	Atp6v1d	chr12	-	MXE	Spermatocyte
1065	ENSMUSG00000073077	Gm7173	chrX	-	MXE	Spermatocyte
1066	ENSMUSG00000034303	Ccdc15	chr9	-	MXE	Spermatocyte
1067	ENSMUSG00000001036	Epn2	chr11	-	MXE	Spermatocyte
1068	ENSMUSG00000063052	Lrrc40	chr3	+	MXE	Spermatocyte
1069	ENSMUSG00000004270	Lpcat3	chr6	+	MXE	Spermatocyte
1070	ENSMUSG00000033565	Rbfox2	chr15	-	MXE	Spermatocyte
1071	ENSMUSG00000017631	Abr	chr11	-	MXE	Spermatocyte
1072	ENSMUSG00000020715	Ern1	chr11	-	MXE	Spermatocyte
1073	ENSMUSG00000039701	Usp53	chr3	-	MXE	Spermatocyte
1074	ENSMUSG00000027751	Supt20	chr3	+	MXE	Spermatocyte
1075	ENSMUSG00000037270	4932438A13Rik	chr3	+	MXE	Spermatocyte
1076	ENSMUSG00000022807	Osbpl11	chr16	+	MXE	Spermatocyte
1077	ENSMUSG00000038383	Pigu	chr2	-	MXE	Spermatocyte
1078	ENSMUSG00000060510	Zfp266	chr9	-	MXE	Spermatocyte
1079	ENSMUSG00000028582	Cc2d1b	chr4	+	MXE	Spermatocyte
1080	ENSMUSG00000059586	Nsmce2	chr15	+	MXE	Spermatocyte
1081	ENSMUSG00000026558	Uck2	chr1	-	MXE	Spermatocyte
1082	ENSMUSG00000019951	Uhrf1bp1l	chr10	+	MXE	Spermatocyte
1083	ENSMUSG00000071454	Dtnb	chr12	+	MXE	Spermatocyte
1084	ENSMUSG00000020156	Mum1	chr10	+	MXE	Spermatocyte
1085	ENSMUSG00000038766	Gabpb2	chr3	-	MXE	Spermatocyte
1086	ENSMUSG00000052533	Nup188	chr2	+	MXE	Spermatocyte
1087	ENSMUSG00000022280	Rnf19a	chr15	-	MXE	Spermatocyte
1088	ENSMUSG00000027651	Rprd1b	chr2	+	MXE	Spermatocyte
1089	ENSMUSG00000021178	Psmc1	chr12	+	MXE	Spermatocyte
1090	ENSMUSG00000021209	Ppp4r4	chr12	+	MXE	Spermatocyte
1091	ENSMUSG00000031310	Zmym3	chrX	-	MXE	Spermatocyte
1092	ENSMUSG00000037364	Srrt	chr5	-	MXE	Spermatocyte
1093	ENSMUSG00000028256	Odf2l	chr3	+	MXE	Spermatocyte
1094	ENSMUSG00000022404	Slc25a17	chr15	-	MXE	Spermatocyte
1095	ENSMUSG00000037296	Lsm1	chr8	+	MXE	Spermatocyte
1096	ENSMUSG00000022091	Sorbs3	chr14	-	MXE	Spermatocyte
1097	ENSMUSG00000064181	Rab3ip	chr10	-	MXE	Spermatocyte
1098	ENSMUSG00000058239	Usf2	chr7	-	MXE	Spermatocyte
1099	ENSMUSG00000030982	9030624J02Rik	chr7	+	MXE	Spermatocyte
1100	ENSMUSG00000028458	Tesk1	chr4	+	MXE	Spermatocyte
1101	ENSMUSG00000053091	Lins1	chr7	+	MXE	Spermatocyte
1102	ENSMUSG00000020289	Nprl3	chr11	-	MXE	Spermatocyte
1103	ENSMUSG00000028878	Fam76a	chr4	-	MXE	Spermatocyte
1104	ENSMUSG00000027550	Lrrcc1	chr3	+	MXE	Spermatocyte
1105	ENSMUSG00000020954	Strn3	chr12	-	MXE	Spermatocyte
1106	ENSMUSG00000109324	Prmt1	chr7	-	MXE	Spermatocyte
1107	ENSMUSG00000026584	Scyl3	chr1	+	MXE	Spermatocyte
1108	ENSMUSG00000026803	Ttf1	chr2	+	MXE	Spermatocyte
1109	ENSMUSG00000001376	Vps50	chr6	+	MXE	Spermatocyte
1110	ENSMUSG00000020078	Vps26a	chr10	-	MXE	Spermatocyte
1111	ENSMUSG00000028484	Psip1	chr4	-	MXE	Spermatocyte
1112	ENSMUSG00000044252	Osbpl1a	chr18	-	MXE	Spermatocyte
1113	ENSMUSG00000027855	Sycp1	chr3	-	MXE	Spermatocyte
1114	ENSMUSG00000040407	Akap9	chr5	+	MXE	Spermatocyte
1115	ENSMUSG00000028964	Park7	chr4	-	MXE	Spermatocyte
1116	ENSMUSG00000057554	Lgals8	chr13	-	MXE	Spermatocyte
1117	ENSMUSG00000002718	Cse1l	chr2	+	MXE	Spermatocyte
1118	ENSMUSG00000021428	Riok1	chr13	+	MXE	Spermatocyte
1119	ENSMUSG00000030089	Slc41a3	chr6	+	MXE	Spermatocyte
1120	ENSMUSG00000024563	Smad2	chr18	+	MXE	Spermatocyte
1121	ENSMUSG00000022498	Txndc11	chr16	-	MXE	Spermatocyte
1122	ENSMUSG00000028886	Eya3	chr4	+	MXE	Spermatocyte
1123	ENSMUSG00000026384	Ptpn4	chr1	-	MXE	Spermatocyte
1124	ENSMUSG00000074129	Rpl13a	chr7	-	MXE	Spermatocyte
1125	ENSMUSG00000025558	Dock9	chr14	-	MXE	Spermatocyte
1126	ENSMUSG00000034412	Tbc1d10a	chr11	+	MXE	Spermatocyte
1127	ENSMUSG00000029126	Nsg1	chr5	-	MXE	Spermatocyte
1128	ENSMUSG00000023984	Gm20517	chr17	+	MXE	Spermatocyte
1129	ENSMUSG00000029610	Aimp2	chr5	-	MXE	Spermatocyte
1130	ENSMUSG00000054836	Elp6	chr9	+	MXE	Spermatocyte
1131	ENSMUSG00000052997	Uba2	chr7	-	MXE	Spermatocyte
1132	ENSMUSG00000031068	Glrx3	chr7	+	MXE	Spermatocyte
1133	ENSMUSG00000040506	Ambra1	chr2	+	MXE	Spermatocyte
1134	ENSMUSG00000037720	Tmem33	chr5	+	MXE	Spermatocyte
1135	ENSMUSG00000039599	Fam149b	chr14	+	MXE	Spermatocyte
1136	ENSMUSG00000021709	Erbin	chr13	-	MXE	Spermatocyte
1137	ENSMUSG00000043154	Ppp2r3a	chr9	-	MXE	Spermatocyte
1138	ENSMUSG00000026341	Actr3	chr1	-	MXE	Spermatocyte
1139	ENSMUSG00000039515	Ptpa	chr2	+	MXE	Spermatocyte
1140	ENSMUSG00000026917	Wdr5	chr2	+	MXE	Spermatocyte
1141	ENSMUSG00000029238	Clock	chr5	-	MXE	Spermatocyte
1142	ENSMUSG00000032126	Hmbs	chr9	-	MXE	Spermatocyte
1143	ENSMUSG00000030231	Plekha5	chr6	+	MXE	Spermatocyte
1144	ENSMUSG00000018677	Slc25a39	chr11	-	MXE	Spermatocyte
1145	ENSMUSG00000053470	Kdm3a	chr6	-	MXE	Spermatocyte
1146	ENSMUSG00000036893	Ehmt1	chr2	-	MXE	Spermatocyte
1147	ENSMUSG00000037725	Ckap2	chr8	-	MXE	Spermatocyte
1148	ENSMUSG00000035666	Gtf3c4	chr2	-	MXE	Spermatocyte
1149	ENSMUSG00000039697	Ncoa7	chr10	-	MXE	Spermatocyte
1150	ENSMUSG00000027018	Hat1	chr2	+	MXE	Spermatocyte
1151	ENSMUSG00000058392	Rrp1b	chr17	+	MXE	Spermatocyte
1152	ENSMUSG00000026927	Sdccag3	chr2	-	MXE	Spermatocyte
1153	ENSMUSG00000020982	Nemf	chr12	-	MXE	Spermatocyte
1154	ENSMUSG00000025410	Dctn2	chr10	+	MXE	Spermatocyte
1155	ENSMUSG00000035596	Mboat7	chr7	-	MXE	Spermatocyte
1156	ENSMUSG00000025451	Paip1	chr13	+	MXE	Spermatocyte
1157	ENSMUSG00000028086	Fbxw7	chr3	+	MXE	Spermatocyte
1158	ENSMUSG00000035439	Haus8	chr8	-	MXE	Spermatocyte
1159	ENSMUSG00000025512	Chid1	chr7	-	MXE	Spermatocyte
1160	ENSMUSG00000025793	Hgs	chr11	+	MXE	Spermatocyte
1161	ENSMUSG00000027673	Ndufb5	chr3	+	MXE	Spermatocyte
1162	ENSMUSG00000030059	Tmf1	chr6	-	MXE	Spermatocyte
1163	ENSMUSG00000024966	Stip1	chr19	-	MXE	Spermatocyte
1164	ENSMUSG00000098950	Gm28036	chr2	-	MXE	Spermatocyte
1165	ENSMUSG00000026353	Ubxn4	chr1	+	MXE	Spermatocyte
1166	ENSMUSG00000022710	Usp7	chr16	-	MXE	Spermatocyte
1167	ENSMUSG00000026309	Ilkap	chr1	-	MXE	Spermatocyte
1168	ENSMUSG00000038644	Pold1	chr7	-	MXE	Spermatocyte
1169	ENSMUSG00000028156	Eif4e	chr3	+	MXE	Spermatocyte
1170	ENSMUSG00000061904	Slc25a3	chr10	-	MXE	Spermatocyte
1171	ENSMUSG00000033904	Ccp110	chr7	+	MXE	Spermatocyte
1172	ENSMUSG00000028637	Ccdc30	chr4	-	MXE	Spermatocyte
1173	ENSMUSG00000029147	Ppm1g	chr5	-	MXE	Spermatocyte
1174	ENSMUSG00000029267	Mtf2	chr5	+	MXE	Spermatocyte
1175	ENSMUSG00000022680	Pdxdc1	chr16	-	MXE	Spermatocyte
1176	ENSMUSG00000097993	Ptprv	chr1	-	MXE	Spermatocyte
1177	ENSMUSG00000028757	Ddost	chr4	+	MXE	Spermatocyte
1178	ENSMUSG00000022400	Rbx1	chr15	+	MXE	Spermatocyte
1179	ENSMUSG00000033444	Specc1l	chr10	+	MXE	Spermatocyte
1180	ENSMUSG00000071337	Tia1	chr6	+	MXE	Spermatocyte
1181	ENSMUSG00000024193	Phf1	chr17	+	MXE	Spermatocyte
1182	ENSMUSG00000071324	Armc2	chr10	-	MXE	Spermatocyte
1183	ENSMUSG00000037426	Depdc5	chr5	+	MXE	Spermatocyte
1184	ENSMUSG00000028975	Pex14	chr4	-	MXE	Spermatocyte
1185	ENSMUSG00000024588	Fech	chr18	-	MXE	Spermatocyte
1186	ENSMUSG00000025912	Mybl1	chr1	-	MXE	Spermatocyte
1187	ENSMUSG00000069094	Pde7a	chr3	-	MXE	Spermatocyte
1188	ENSMUSG00000036792	Mbd5	chr2	+	MXE	Spermatocyte
1189	ENSMUSG00000026131	Dst	chr1	+	MXE	Spermatocyte
1190	ENSMUSG00000041491	Cep78	chr19	-	MXE	Spermatocyte
1191	ENSMUSG00000020189	Osbpl8	chr10	+	MXE	Spermatocyte
1192	ENSMUSG00000015542	Nat9	chr11	-	MXE	Spermatocyte
1193	ENSMUSG00000028164	Manba	chr3	+	MXE	Spermatocyte
1194	ENSMUSG00000027469	Tpx2	chr2	+	MXE	Spermatocyte
1195	ENSMUSG00000024165	Hn1l	chr17	-	MXE	Spermatocyte
1196	ENSMUSG00000058729	Lin9	chr1	+	MXE	Spermatocyte
1197	ENSMUSG00000068921	Dap3	chr3	-	MXE	Spermatocyte
1198	ENSMUSG00000039671	Zmynd8	chr2	-	MXE	Spermatocyte
1199	ENSMUSG00000024743	Syt7	chr19	+	MXE	Spermatocyte
1200	ENSMUSG00000009596	Taf7l	chrX	-	MXE	Spermatocyte
1201	ENSMUSG00000046519	Golph3l	chr3	+	MXE	Spermatocyte
1202	ENSMUSG00000033411	Ctdspl2	chr2	+	MXE	Spermatocyte
1203	ENSMUSG00000039456	Morc3	chr16	+	MXE	Spermatocyte
1204	ENSMUSG00000027411	Vps16	chr2	+	MXE	Spermatocyte
1205	ENSMUSG00000025544	Tm9sf2	chr14	+	MXE	Spermatocyte
1206	ENSMUSG00000057236	Rbbp4	chr4	-	MXE	Spermatocyte
1207	ENSMUSG00000027282	Mtch2	chr2	+	MXE	Spermatocyte
1208	ENSMUSG00000032216	Nedd4	chr9	+	MXE	Spermatocyte
1209	ENSMUSG00000114797	Nupl1	chr14	-	MXE	Spermatocyte
1210	ENSMUSG00000019814	Ltv1	chr10	-	MXE	Spermatocyte
1211	ENSMUSG00000026991	Pkp4	chr2	+	MXE	Spermatocyte
1212	ENSMUSG00000018425	Dhx40	chr11	-	MXE	Spermatocyte
1213	ENSMUSG00000078588	Ccdc24	chr4	-	MXE	Spermatocyte
1214	ENSMUSG00000034601	2700049A03Rik	chr12	+	MXE	Spermatocyte
1215	ENSMUSG00000012535	Tnpo3	chr6	-	MXE	Spermatocyte
1216	ENSMUSG00000074656	Eif2s2	chr2	-	MXE	Spermatocyte
1217	ENSMUSG00000021552	Gkap1	chr13	-	MXE	Spermatocyte
1218	ENSMUSG00000029141	Slc4a1ap	chr5	+	MXE	Spermatocyte
1219	ENSMUSG00000042213	Zfand4	chr6	+	MXE	Spermatocyte
1220	ENSMUSG00000021819	Zswim8	chr14	+	MXE	Spermatocyte
1221	ENSMUSG00000039356	Exosc2	chr2	+	MXE	Spermatocyte
1222	ENSMUSG00000038943	Prc1	chr7	+	MXE	Spermatocyte
1223	ENSMUSG00000026036	Nif3l1	chr1	+	MXE	Spermatocyte
1224	ENSMUSG00000036501	Fam13b	chr18	-	MXE	Spermatocyte
1225	ENSMUSG00000023079	Gtf2ird1	chr5	-	MXE	Spermatocyte
1226	ENSMUSG00000063972	Nr6a1	chr2	-	MXE	Spermatocyte
1227	ENSMUSG00000043962	Thrap3	chr4	-	MXE	Spermatocyte
1228	ENSMUSG00000027465	Tbc1d20	chr2	+	MXE	Spermatocyte
1229	ENSMUSG00000055436	Srsf11	chr3	-	MXE	Spermatocyte
1230	ENSMUSG00000028954	Nub1	chr5	+	MXE	Spermatocyte
1231	ENSMUSG00000062761	Zfp512	chr5	+	MXE	Spermatocyte
1232	ENSMUSG00000017119	Nbr1	chr11	+	MXE	Spermatocyte
1233	ENSMUSG00000020184	Mdm2	chr10	-	MXE	Spermatocyte
1234	ENSMUSG00000034543	Morc2a	chr11	+	MXE	Spermatocyte
1235	ENSMUSG00000029390	Tmed2	chr5	+	MXE	Spermatocyte
1236	ENSMUSG00000020463	Ppp4r3b	chr11	+	MXE	Spermatocyte
1237	ENSMUSG00000062604	Srpk2	chr5	-	MXE	Spermatocyte
1238	ENSMUSG00000052298	Cdc42se2	chr11	-	MXE	Spermatocyte
1239	ENSMUSG00000004099	Dnmt1	chr9	-	MXE	Spermatocyte
1240	ENSMUSG00000015090	Ptgds	chr2	-	MXE	Spermatocyte
1241	ENSMUSG00000024218	Taf11	chr17	-	MXE	Spermatocyte
1242	ENSMUSG00000027353	Mcm8	chr2	+	MXE	Spermatocyte
1243	ENSMUSG00000032411	Tfdp2	chr9	+	MXE	Spermatocyte
1244	ENSMUSG00000024764	Naa40	chr19	-	MXE	Spermatocyte
1245	ENSMUSG00000028693	Nasp	chr4	-	MXE	Spermatocyte
1246	ENSMUSG00000007783	Cpt1c	chr7	-	MXE	Spermatocyte
1247	ENSMUSG00000061950	Ppp4r1	chr17	+	MXE	Spermatocyte
1248	ENSMUSG00000047193	Dync2h1	chr9	-	MXE	Spermatocyte
1249	ENSMUSG00000032228	Tcf12	chr9	-	MXE	Spermatocyte
1250	ENSMUSG00000021917	Spcs1	chr14	-	MXE	Spermatocyte
1251	ENSMUSG00000018171	Vmp1	chr11	-	MXE	Spermatocyte
1252	ENSMUSG00000022708	Zbtb20	chr16	+	MXE	Spermatocyte
1253	ENSMUSG00000039233	Tbce	chr13	-	MXE	Spermatocyte
1254	ENSMUSG00000000902	Smarcb1	chr10	-	MXE	Spermatocyte
1255	ENSMUSG00000040785	Ttc3	chr16	+	MXE	Spermatocyte
1256	ENSMUSG00000000563	Atp5f1	chr3	-	MXE	Spermatocyte
1257	ENSMUSG00000072501	Phf20l1	chr15	+	MXE	Spermatocyte
1258	ENSMUSG00000010721	Lmbr1	chr5	-	MXE	Spermatocyte
1259	ENSMUSG00000021009	Ptpn21	chr12	-	MXE	Spermatocyte
1260	ENSMUSG00000031516	Dctn6	chr8	-	MXE	Spermatocyte
1261	ENSMUSG00000029478	Ncor2	chr5	-	MXE	Spermatocyte
1262	ENSMUSG00000030846	Tial1	chr7	-	MXE	Spermatocyte
1263	ENSMUSG00000025162	Csnk1d	chr11	-	MXE	Spermatocyte
1264	ENSMUSG00000112508	Sept2	chr1	+	MXE	Spermatocyte
1265	ENSMUSG00000037795	N4bp2	chr5	+	MXE	Spermatocyte
1266	ENSMUSG00000036180	Gatad2a	chr8	-	MXE	Spermatocyte
1267	ENSMUSG00000044702	Palb2	chr7	-	MXE	Spermatocyte
1268	ENSMUSG00000042569	Dhrs7b	chr11	+	MXE	Spermatocyte
1269	ENSMUSG00000031351	Zfp185	chrX	+	MXE	Spermatocyte
1270	ENSMUSG00000033985	Tesk2	chr4	+	MXE	Spermatocyte
1271	ENSMUSG00000028114	Mettl14	chr3	-	MXE	Spermatocyte
1272	ENSMUSG00000025232	Hexa	chr9	+	MXE	Spermatocyte
1273	ENSMUSG00000001569	Nom1	chr5	+	MXE	Spermatocyte
1274	ENSMUSG00000113525	AC154550.1	chr13	-	MXE	Spermatocyte
1275	ENSMUSG00000022607	Ptk2	chr15	-	MXE	Spermatocyte
1276	ENSMUSG00000018372	Cep95	chr11	+	MXE	Spermatocyte
1277	ENSMUSG00000020520	Galnt10	chr11	+	MXE	Spermatocyte
1278	ENSMUSG00000023272	Creld2	chr15	+	MXE	Spermatocyte
1279	ENSMUSG00000019373	Cops3	chr11	-	MXE	Spermatocyte
1280	ENSMUSG00000046753	Ccdc66	chr14	-	MXE	Spermatocyte
1281	ENSMUSG00000022668	Gtpbp8	chr16	-	MXE	Spermatocyte
1282	ENSMUSG00000031902	Nfatc3	chr8	+	MXE	Spermatocyte
1283	ENSMUSG00000032178	Ilf3	chr9	+	MXE	Spermatocyte
1284	ENSMUSG00000035378	Shq1	chr6	-	MXE	Spermatocyte
1285	ENSMUSG00000061306	Slc38a10	chr11	-	MXE	Spermatocyte
1286	ENSMUSG00000024493	Lars	chr18	-	MXE	Spermatocyte
1287	ENSMUSG00000066640	Fbxl18	chr5	-	MXE	Spermatocyte
1288	ENSMUSG00000046434	Hnrnpa1	chr15	+	MXE	Spermatocyte
1289	ENSMUSG00000011306	Sugp1	chr8	+	MXE	Spermatocyte
1290	ENSMUSG00000026977	March7	chr2	+	MXE	Spermatocyte
1291	ENSMUSG00000025060	Slk	chr19	+	MXE	Spermatocyte
1292	ENSMUSG00000058446	Znrf2	chr6	+	MXE	Spermatocyte
1293	ENSMUSG00000024974	Smc3	chr19	+	MXE	Spermatocyte
1294	ENSMUSG00000005871	Apc	chr18	+	MXE	Spermatocyte
1295	ENSMUSG00000030660	Pik3c2a	chr7	-	MXE	Spermatocyte
1296	ENSMUSG00000016495	Plgrkt	chr19	-	MXE	Spermatocyte
1297	ENSMUSG00000027763	Mbnl1	chr3	+	MXE	Spermatocyte
1298	ENSMUSG00000041236	Vps41	chr13	+	MXE	Spermatocyte
1299	ENSMUSG00000045915	Ccdc42	chr11	+	MXE	Spermatocyte
1300	ENSMUSG00000093752	Gm20716	chr2	-	MXE	Spermatocyte
1301	ENSMUSG00000024400	Wdr33	chr18	+	MXE	Spermatocyte
1302	ENSMUSG00000030638	Sh3gl3	chr7	+	MXE	Spermatocyte
1303	ENSMUSG00000035293	G2e3	chr12	+	MXE	Spermatocyte
1304	ENSMUSG00000030706	Mrpl48	chr7	-	MXE	Spermatocyte
1305	ENSMUSG00000021911	Parg	chr14	+	MXE	Spermatocyte
1306	ENSMUSG00000020076	Ddx50	chr10	-	MXE	Spermatocyte
1307	ENSMUSG00000028437	Ubap1	chr4	+	MXE	Spermatocyte
1308	ENSMUSG00000043535	Setx	chr2	+	MXE	Spermatocyte
1309	ENSMUSG00000031878	Nae1	chr8	-	MXE	Spermatocyte
1310	ENSMUSG00000052102	Gnpda1	chr18	-	MXE	Spermatocyte
1311	ENSMUSG00000042198	Chchd7	chr4	+	MXE	Spermatocyte
1312	ENSMUSG00000024885	Aldh3b1	chr19	-	MXE	Spermatocyte
1313	ENSMUSG00000017548	Suz12	chr11	+	MXE	Spermatocyte
1314	ENSMUSG00000023044	Csad	chr15	-	MXE	Spermatocyte
1315	ENSMUSG00000036676	Tmtc3	chr10	-	MXE	Spermatocyte
1316	ENSMUSG00000004929	Thop1	chr10	+	MXE	Spermatocyte
1317	ENSMUSG00000031446	Cul4a	chr8	+	MXE	Spermatocyte
1318	ENSMUSG00000022797	Tfrc	chr16	+	MXE	Spermatocyte
1319	ENSMUSG00000042032	Mat2b	chr11	-	MXE	Spermatocyte
1320	ENSMUSG00000023277	Twf2	chr9	+	MXE	Spermatocyte
1321	ENSMUSG00000070371	Prss36	chr7	-	MXE	Spermatocyte
1322	ENSMUSG00000025220	Mgea5	chr19	-	MXE	Spermatocyte
1323	ENSMUSG00000022034	Esco2	chr14	-	MXE	Spermatocyte
1324	ENSMUSG00000031711	Zfp330	chr8	-	MXE	Spermatocyte
1325	ENSMUSG00000010755	Cars	chr7	-	MXE	Spermatocyte
1326	ENSMUSG00000043885	Slc36a4	chr9	+	MXE	Spermatocyte
1327	ENSMUSG00000050199	Lgr4	chr2	+	MXE	Spermatocyte
1328	ENSMUSG00000032567	Aste1	chr9	+	MXE	Spermatocyte
1329	ENSMUSG00000027942	4933434E20Rik	chr3	+	MXE	Spermatocyte
1330	ENSMUSG00000061136	Prpf40a	chr2	-	MXE	Spermatocyte
1331	ENSMUSG00000061607	Mdc1	chr17	+	MXE	Spermatocyte
1332	ENSMUSG00000019843	Fyn	chr10	+	MXE	Spermatocyte
1333	ENSMUSG00000024817	Uhrf2	chr19	+	MXE	Spermatocyte
1334	ENSMUSG00000074578	Zfas1	chr2	+	MXE	Spermatocyte
1335	ENSMUSG00000007867	Ift43	chr12	+	MXE	Spermatocyte
1336	ENSMUSG00000024055	Cyp4f13	chr17	-	MXE	Spermatocyte
1337	ENSMUSG00000041415	Dicer1	chr12	-	MXE	Spermatocyte
1338	ENSMUSG00000036606	Plxnb2	chr15	-	MXE	Spermatocyte
1339	ENSMUSG00000026915	Strbp	chr2	-	MXE	Spermatocyte
1340	ENSMUSG00000039108	Lsm14b	chr2	+	MXE	Spermatocyte
1341	ENSMUSG00000026933	Camsap1	chr2	-	MXE	Spermatocyte
1342	ENSMUSG00000034206	Polq	chr16	+	MXE	Spermatocyte
1343	ENSMUSG00000038295	Atg9b	chr5	-	MXE	Spermatocyte
1344	ENSMUSG00000010936	Vac14	chr8	+	MXE	Spermatocyte
1345	ENSMUSG00000061613	U2af1	chr17	-	MXE	Spermatocyte
1346	ENSMUSG00000057531	Dtnbp1	chr13	-	MXE	Spermatocyte
1347	ENSMUSG00000030924	Rexo5	chr7	+	MXE	Spermatocyte
1348	ENSMUSG00000052852	Reep1	chr6	+	MXE	Spermatocyte
1349	ENSMUSG00000019470	Xab2	chr8	-	MXE	Spermatocyte
1350	ENSMUSG00000023764	Sfi1	chr11	-	MXE	Spermatocyte
1351	ENSMUSG00000040151	Hs2st1	chr3	-	MXE	Spermatocyte
1352	ENSMUSG00000032477	Cdc25a	chr9	+	MXE	Spermatocyte
1353	ENSMUSG00000009207	Lnpk	chr2	-	MXE	Spermatocyte
1354	ENSMUSG00000035021	Baz1a	chr12	-	MXE	Spermatocyte
1355	ENSMUSG00000036737	Oxsr1	chr9	-	MXE	Spermatocyte
1356	ENSMUSG00000029458	Brap	chr5	+	MXE	Spermatocyte
1357	ENSMUSG00000091474	2610021A01Rik	chr7	+	MXE	Spermatocyte
1358	ENSMUSG00000028995	Fam126a	chr5	-	MXE	Spermatocyte
1359	ENSMUSG00000023066	Rttn	chr18	+	MXE	Spermatocyte
1360	ENSMUSG00000015846	Rxra	chr2	+	MXE	Spermatocyte
1361	ENSMUSG00000040648	Ppip5k2	chr1	-	MXE	Spermatocyte
1362	ENSMUSG00000062234	Gak	chr5	-	MXE	Spermatocyte
1363	ENSMUSG00000036928	Stag3	chr5	+	MXE	Spermatocyte
1364	ENSMUSG00000034055	Phka1	chrX	-	MXE	Spermatocyte
1365	ENSMUSG00000025235	Bbs4	chr9	-	MXE	Spermatocyte
1366	ENSMUSG00000105340	Gm42878	chr5	-	MXE	Spermatocyte
1367	ENSMUSG00000040188	Scamp2	chr9	+	MXE	Spermatocyte
1368	ENSMUSG00000020380	Rad50	chr11	-	MXE	Spermatocyte
1369	ENSMUSG00000092137	Gcom1	chr9	-	MXE	Spermatocyte
1370	ENSMUSG00000039629	Strip2	chr6	+	MXE	Spermatocyte
1371	ENSMUSG00000057738	Sptan1	chr2	+	MXE	Spermatocyte
1372	ENSMUSG00000024286	Ccny	chr18	-	MXE	Spermatocyte
1373	ENSMUSG00000039000	Ube3c	chr5	+	MXE	Spermatocyte
1374	ENSMUSG00000038569	Rad9b	chr5	-	MXE	Spermatocyte
1375	ENSMUSG00000024911	Fibp	chr19	+	MXE	Spermatocyte
1376	ENSMUSG00000073664	Nbeal1	chr1	+	MXE	Spermatocyte
1377	ENSMUSG00000052407	Ccdc171	chr4	+	MXE	Spermatocyte
1378	ENSMUSG00000032479	Map4	chr9	+	MXE	Spermatocyte
1379	ENSMUSG00000043987	Cep164	chr9	-	MXE	Spermatocyte
1380	ENSMUSG00000070953	Rabepk	chr2	-	MXE	Spermatocyte
1381	ENSMUSG00000020594	Pum2	chr12	+	MXE	Spermatocyte
1382	ENSMUSG00000024096	Ralbp1	chr17	-	MXE	Spermatocyte
1383	ENSMUSG00000024542	Cep192	chr18	+	MXE	Spermatocyte
1384	ENSMUSG00000027677	Ttc14	chr3	+	MXE	Spermatocyte
1385	ENSMUSG00000029629	Phf14	chr6	+	MXE	Spermatocyte
1386	ENSMUSG00000027284	Cdan1	chr2	-	MXE	Spermatocyte
1387	ENSMUSG00000022855	Senp2	chr16	+	MXE	Spermatocyte
1388	ENSMUSG00000027589	Pcmtd2	chr2	+	MXE	Spermatocyte
1389	ENSMUSG00000042726	Trafd1	chr5	-	MXE	Spermatocyte
1390	ENSMUSG00000022442	Ttll1	chr15	-	MXE	Spermatocyte
1391	ENSMUSG00000031729	Ist1	chr8	-	MXE	Spermatocyte
1392	ENSMUSG00000001419	Mef2d	chr3	+	MXE	Spermatocyte
1393	ENSMUSG00000032913	Lrig2	chr3	-	MXE	Spermatocyte
1394	ENSMUSG00000053768	Chchd3	chr6	-	MXE	Spermatocyte
1395	ENSMUSG00000029017	Pmpcb	chr5	+	MXE	Spermatocyte
1396	ENSMUSG00000029202	Pds5a	chr5	-	MXE	Spermatocyte
1397	ENSMUSG00000030254	Rad18	chr6	-	MXE	Spermatocyte
1398	ENSMUSG00000042599	Kdm7a	chr6	-	MXE	Spermatocyte
1399	ENSMUSG00000098374	Gm28043	chr17	+	MXE	Spermatocyte
1400	ENSMUSG00000023047	Amhr2	chr15	+	MXE	Spermatocyte
1401	ENSMUSG00000028917	Plekhm2	chr4	-	MXE	Spermatocyte
1402	ENSMUSG00000025404	R3hdm2	chr10	+	MXE	Spermatocyte
1403	ENSMUSG00000027111	Itga6	chr2	+	MXE	Spermatocyte
1404	ENSMUSG00000022432	Smc1b	chr15	-	MXE	Spermatocyte
1405	ENSMUSG00000039069	Mtg2	chr2	+	MXE	Spermatocyte
1406	ENSMUSG00000022570	Tsta3	chr15	-	MXE	Spermatocyte
1407	ENSMUSG00000002845	Tmem39a	chr16	+	MXE	Spermatocyte
1408	ENSMUSG00000031816	Mthfsd	chr8	-	MXE	Spermatocyte
1409	ENSMUSG00000060073	Psma3	chr12	+	MXE	Spermatocyte
1410	ENSMUSG00000028649	Macf1	chr4	-	MXE	Spermatocyte
1411	ENSMUSG00000091556	Gm14569	chrX	-	MXE	Spermatocyte
1412	ENSMUSG00000002326	Gmpr2	chr14	+	MXE	Spermatocyte
1413	ENSMUSG00000029003	Mad2l2	chr4	+	MXE	Spermatocyte
1414	ENSMUSG00000022394	L3mbtl2	chr15	+	MXE	Spermatocyte
1415	ENSMUSG00000032525	Nktr	chr9	+	MXE	Spermatocyte
1416	ENSMUSG00000033799	Fam208b	chr13	-	MXE	Spermatocyte
1417	ENSMUSG00000022837	Iqcb1	chr16	+	MXE	Spermatocyte
1418	ENSMUSG00000015806	Qdpr	chr5	-	MXE	Spermatocyte
1419	ENSMUSG00000010110	Stx5a	chr19	+	MXE	Spermatocyte
1420	ENSMUSG00000021770	Samd8	chr14	+	MXE	Spermatocyte
1421	ENSMUSG00000033029	1700088E04Rik	chr15	-	MXE	Spermatocyte
1422	ENSMUSG00000014426	Map3k4	chr17	-	MXE	Spermatocyte
1423	ENSMUSG00000036890	Gtdc1	chr2	-	MXE	Spermatocyte
1424	ENSMUSG00000021147	Wdr37	chr13	-	MXE	Spermatocyte
1425	ENSMUSG00000042211	Fbxo38	chr18	-	MXE	Spermatocyte
1426	ENSMUSG00000027620	Rbm39	chr2	-	MXE	Spermatocyte
1427	ENSMUSG00000071866	Ppia	chr11	+	MXE	Spermatocyte
1428	ENSMUSG00000024050	Wiz	chr17	-	MXE	Spermatocyte
1429	ENSMUSG00000021906	Oxnad1	chr14	+	MXE	Spermatocyte
1430	ENSMUSG00000023951	Vegfa	chr17	-	MXE	Spermatocyte
1431	ENSMUSG00000032717	Mdfi	chr17	-	MXE	Spermatocyte
1432	ENSMUSG00000027715	Ccna2	chr3	-	MXE	Spermatocyte
1433	ENSMUSG00000029617	Ccz1	chr5	-	MXE	Spermatocyte
1434	ENSMUSG00000035958	Tdp2	chr13	+	MXE	Spermatocyte
1435	ENSMUSG00000002014	Ssr4	chrX	+	MXE	Spermatocyte
1436	ENSMUSG00000023965	Fbxl17	chr17	-	MXE	Spermatocyte
1437	ENSMUSG00000034610	Zcchc11	chr4	+	MXE	Spermatocyte
1438	ENSMUSG00000038546	Ranbp9	chr13	-	MXE	Spermatocyte
1439	ENSMUSG00000033487	Fndc3a	chr14	-	MXE	Spermatocyte
1440	ENSMUSG00000034994	Eef2	chr10	+	MXE	Spermatocyte
1441	ENSMUSG00000037628	Cdkn3	chr14	+	MXE	Spermatocyte
1442	ENSMUSG00000052406	Rexo4	chr2	-	MXE	Spermatocyte
1443	ENSMUSG00000020671	Rab10	chr12	-	MXE	Spermatocyte
1444	ENSMUSG00000023089	Ndufa5	chr6	-	MXE	Spermatocyte
1445	ENSMUSG00000033943	Mga	chr2	+	MXE	Spermatocyte
1446	ENSMUSG00000015882	Lcorl	chr5	-	MXE	Spermatocyte
1447	ENSMUSG00000025290	Rps24	chr14	+	MXE	Spermatocyte
1448	ENSMUSG00000022833	Ccdc14	chr16	+	MXE	Spermatocyte
1449	ENSMUSG00000038831	Ralgps1	chr2	-	MXE	Spermatocyte
1450	ENSMUSG00000090386	Mir99ahg	chr16	+	MXE	Spermatocyte
1451	ENSMUSG00000026355	Mcm6	chr1	-	MXE	Spermatocyte
1452	ENSMUSG00000025724	Sec11a	chr7	-	MXE	Spermatocyte
1453	ENSMUSG00000038047	Haus6	chr4	-	MXE	Spermatocyte
1454	ENSMUSG00000032101	Ddx25	chr9	-	MXE	Spermatocyte
1455	ENSMUSG00000090100	Ttbk2	chr2	-	MXE	Spermatocyte
1456	ENSMUSG00000064145	Arih2	chr9	-	MXE	Spermatocyte
1457	ENSMUSG00000022635	Zcrb1	chr15	-	MXE	Spermatocyte
1458	ENSMUSG00000021098	4930447C04Rik	chr12	-	MXE	Spermatocyte
1459	ENSMUSG00000024799	Tm7sf2	chr19	-	MXE	Spermatocyte
1460	ENSMUSG00000028797	Tmem234	chr4	+	MXE	Spermatocyte
1461	ENSMUSG00000025041	Nt5c2	chr19	-	MXE	Spermatocyte
1462	ENSMUSG00000036555	Iqce	chr5	-	MXE	Spermatocyte
1463	ENSMUSG00000068663	Clec16a	chr16	+	MXE	Spermatocyte
1464	ENSMUSG00000011960	Ccnt1	chr15	-	MXE	Spermatocyte
1465	ENSMUSG00000069089	Cdk7	chr13	-	MXE	Spermatocyte
1466	ENSMUSG00000032595	Cdhr4	chr9	+	MXE	Spermatocyte
1467	ENSMUSG00000063884	Ptcd3	chr6	-	MXE	Spermatocyte
1468	ENSMUSG00000015143	Actn1	chr12	-	MXE	Spermatocyte
1469	ENSMUSG00000024480	Ap3s1	chr18	+	MXE	Spermatocyte
1470	ENSMUSG00000044937	Ttc41	chr10	+	MXE	Spermatocyte
1471	ENSMUSG00000066441	Rdh11	chr12	-	MXE	Spermatocyte
1472	ENSMUSG00000025583	Rptor	chr11	+	MXE	Spermatocyte
1473	ENSMUSG00000008683	Rps15a	chr7	-	MXE	Spermatocyte
1474	ENSMUSG00000064307	Lrrc51	chr7	-	MXE	Spermatocyte
1475	ENSMUSG00000020949	Fkbp3	chr12	-	MXE	Spermatocyte
1476	ENSMUSG00000021910	Nisch	chr14	-	MXE	Spermatocyte
1477	ENSMUSG00000003062	Stard3nl	chr13	-	MXE	Spermatocyte
1478	ENSMUSG00000025702	March8	chr6	+	MXE	Spermatocyte
1479	ENSMUSG00000022808	Snx4	chr16	+	MXE	Spermatocyte
1480	ENSMUSG00000045962	Wnk1	chr6	-	MXE	Spermatocyte
1481	ENSMUSG00000004642	Slbp	chr5	-	MXE	Spermatocyte
1482	ENSMUSG00000037013	Ss18	chr18	-	MXE	Spermatocyte
1483	ENSMUSG00000028898	Trnau1ap	chr4	-	MXE	Spermatocyte
1484	ENSMUSG00000001847	Rac1	chr5	-	MXE	Spermatocyte
1485	ENSMUSG00000022604	Cep97	chr16	-	MXE	Spermatocyte
1486	ENSMUSG00000045466	Zfp956	chr6	+	MXE	Spermatocyte
1487	ENSMUSG00000033653	Vps8	chr16	+	MXE	Spermatocyte
1488	ENSMUSG00000025571	Tnrc6c	chr11	+	MXE	Spermatocyte
1489	ENSMUSG00000040123	Zmym5	chr14	-	MXE	Spermatocyte
1490	ENSMUSG00000027104	Atf2	chr2	-	MXE	Spermatocyte
1491	ENSMUSG00000053332	Gas5	chr1	+	MXE	Spermatocyte
1492	ENSMUSG00000015095	Fbxw5	chr2	+	MXE	Spermatocyte
1493	ENSMUSG00000055809	Dnaaf3	chr7	-	MXE	Spermatocyte
1494	ENSMUSG00000061474	Mrps36	chr13	-	MXE	Spermatocyte
1495	ENSMUSG00000041215	Yeats2	chr16	+	MXE	Spermatocyte
1496	ENSMUSG00000045031	Cetn4	chr3	-	MXE	Spermatocyte
1497	ENSMUSG00000051811	Cox6b2	chr7	-	MXE	Spermatocyte
1498	ENSMUSG00000002319	Ipo4	chr14	-	MXE	Spermatocyte
1499	ENSMUSG00000028456	Unc13b	chr4	+	MXE	Spermatocyte
1500	ENSMUSG00000028756	Pink1	chr4	-	MXE	Spermatocyte
1501	ENSMUSG00000030509	Asb7	chr7	-	MXE	Spermatocyte
1502	ENSMUSG00000060992	Copz1	chr15	+	MXE	Spermatocyte
1503	ENSMUSG00000037949	Ano10	chr9	-	MXE	Spermatocyte
1504	ENSMUSG00000032557	Uba5	chr9	-	MXE	Spermatocyte
1505	ENSMUSG00000027680	Fxr1	chr3	+	MXE	Spermatocyte
1506	ENSMUSG00000025529	Zfp711	chrX	+	MXE	Spermatocyte
1507	ENSMUSG00000030884	Uqcrc2	chr7	+	MXE	Spermatocyte
1508	ENSMUSG00000020290	Xpo1	chr11	+	MXE	Spermatocyte
1509	ENSMUSG00000024665	Fads2	chr19	-	MXE	Spermatocyte
1510	ENSMUSG00000022471	Xrcc6	chr15	+	MXE	Spermatocyte
1511	ENSMUSG00000026319	2310035C23Rik	chr1	+	MXE	Spermatocyte
1512	ENSMUSG00000057335	Cep170	chr1	-	MXE	Spermatocyte
1513	ENSMUSG00000040565	Btaf1	chr19	+	MXE	Spermatocyte
1514	ENSMUSG00000036099	Vezt	chr10	-	MXE	Spermatocyte
1515	ENSMUSG00000015837	Sqstm1	chr11	-	MXE	Spermatocyte
1516	ENSMUSG00000022428	Cby1	chr15	+	MXE	Spermatocyte
1517	ENSMUSG00000028426	Rad23b	chr4	+	MXE	Spermatocyte
1518	ENSMUSG00000037369	Kdm6a	chrX	+	MXE	Spermatocyte
1519	ENSMUSG00000019813	Cep57l1	chr10	-	MXE	Spermatocyte
1520	ENSMUSG00000022160	Mettl3	chr14	-	MXE	Spermatocyte
1521	ENSMUSG00000028402	Mpdz	chr4	-	MXE	Spermatocyte
1522	ENSMUSG00000062421	Arf2	chr11	+	MXE	Spermatocyte
1523	ENSMUSG00000054808	Actn4	chr7	-	MXE	Spermatocyte
1524	ENSMUSG00000030761	Myo7a	chr7	-	MXE	Spermatocyte
1525	ENSMUSG00000020246	Hcfc2	chr10	+	MXE	Spermatocyte
1526	ENSMUSG00000036377	C530008M17Rik	chr5	+	MXE	Spermatocyte
1527	ENSMUSG00000068823	Csde1	chr3	+	MXE	Spermatocyte
1528	ENSMUSG00000040738	Ints8	chr4	-	MXE	Spermatocyte
1529	ENSMUSG00000029625	Cpsf4	chr5	+	MXE	Spermatocyte
1530	ENSMUSG00000055371	Stam2	chr2	-	MXE	Spermatocyte
1531	ENSMUSG00000033632	AW554918	chr18	+	MXE	Spermatocyte
1532	ENSMUSG00000044595	Dnd1	chr18	-	MXE	Spermatocyte
1533	ENSMUSG00000005262	Ufd1	chr16	+	MXE	Spermatocyte
1534	ENSMUSG00000015165	Hnrnpl	chr7	+	MXE	Spermatocyte
1535	ENSMUSG00000028937	Acot7	chr4	+	MXE	Spermatocyte
1536	ENSMUSG00000020698	Cct6b	chr11	-	MXE	Spermatocyte
1537	ENSMUSG00000014959	Gorasp2	chr2	+	MXE	Spermatocyte
1538	ENSMUSG00000034254	Agpat1	chr17	+	MXE	Spermatocyte
1539	ENSMUSG00000059208	Hnrnpm	chr17	-	MXE	Spermatocyte
1540	ENSMUSG00000055013	Agap1	chr1	+	MXE	Spermatocyte
1541	ENSMUSG00000029089	5730480H06Rik	chr5	+	MXE	Spermatocyte
1542	ENSMUSG00000006678	Pola1	chrX	-	MXE	Spermatocyte
1543	ENSMUSG00000033364	Usp37	chr1	-	MXE	Spermatocyte
1544	ENSMUSG00000034349	Smc4	chr3	+	MXE	Spermatocyte
1545	ENSMUSG00000021012	Zc3h14	chr12	+	MXE	Spermatocyte
1546	ENSMUSG00000030276	Ttll3	chr6	+	MXE	Spermatocyte
1547	ENSMUSG00000006299	Aamp	chr1	-	MXE	Spermatocyte
1548	ENSMUSG00000000538	Tom1l2	chr11	-	MXE	Spermatocyte
1549	ENSMUSG00000054405	Dnajc8	chr4	+	MXE	Spermatocyte
1550	ENSMUSG00000029554	Mad1l1	chr5	-	MXE	Spermatocyte
1551	ENSMUSG00000032579	Hemk1	chr9	-	MXE	Spermatocyte
1552	ENSMUSG00000094985	Topaz1	chr9	+	MXE	Spermatocyte
1553	ENSMUSG00000045751	Mms22l	chr4	+	MXE	Spermatocyte
1554	ENSMUSG00000020415	Pttg1	chr11	-	MXE	Spermatocyte
1555	ENSMUSG00000056211	R3hdm1	chr1	+	MXE	Spermatocyte
1556	ENSMUSG00000027326	Knl1	chr2	+	MXE	Spermatocyte
1557	ENSMUSG00000034998	Foxn2	chr17	+	MXE	Spermatocyte
1558	ENSMUSG00000024566	Atp9b	chr18	-	MXE	Spermatocyte
1559	ENSMUSG00000024695	Zfp91	chr19	-	MXE	Spermatocyte
1560	ENSMUSG00000020166	Cnot2	chr10	-	MXE	Spermatocyte
1561	ENSMUSG00000038005	Hpf1	chr8	+	MXE	Spermatocyte
1562	ENSMUSG00000018906	P4ha2	chr11	+	MXE	Spermatocyte
1563	ENSMUSG00000021264	Yy1	chr12	+	MXE	Spermatocyte
1564	ENSMUSG00000006599	Gtf2h1	chr7	+	MXE	Spermatocyte
1565	ENSMUSG00000042197	Zfp451	chr1	-	MXE	Spermatocyte
1566	ENSMUSG00000003680	Taf6l	chr19	-	MXE	Spermatocyte
1567	ENSMUSG00000023805	Synj2	chr17	+	MXE	Spermatocyte
1568	ENSMUSG00000085566	A730017L22Rik	chr2	-	MXE	Spermatocyte
1569	ENSMUSG00000021668	Polk	chr13	-	MXE	Spermatocyte
1570	ENSMUSG00000041241	Mul1	chr4	+	MXE	Spermatocyte
1571	ENSMUSG00000037544	Dlgap5	chr14	-	MXE	Spermatocyte
1572	ENSMUSG00000069805	Fbp1	chr13	-	MXE	Spermatocyte
1573	ENSMUSG00000001016	Ilf2	chr3	+	MXE	Spermatocyte
1574	ENSMUSG00000021488	Nsd1	chr13	+	MXE	Spermatocyte
1575	ENSMUSG00000021458	2010111I01Rik	chr13	+	MXE	Spermatocyte
1576	ENSMUSG00000024392	Bag6	chr17	+	MXE	Spermatocyte
1577	ENSMUSG00000021693	Kif2a	chr13	-	MXE	Spermatocyte
1578	ENSMUSG00000029076	Sdf4	chr4	+	MXE	Spermatocyte
1579	ENSMUSG00000030491	Tdrd12	chr7	-	MXE	Spermatocyte
1580	ENSMUSG00000022255	Mtdh	chr15	+	MXE	Spermatocyte
1581	ENSMUSG00000041720	Pi4ka	chr16	-	MXE	Spermatocyte
1582	ENSMUSG00000021470	Ercc6l2	chr13	+	MXE	Spermatocyte
1583	ENSMUSG00000042508	Dmtf1	chr5	-	MXE	Spermatocyte
1584	ENSMUSG00000034088	Hdlbp	chr1	-	MXE	Spermatocyte
1585	ENSMUSG00000005899	Smpd4	chr16	+	MXE	Spermatocyte
1586	ENSMUSG00000033004	Mycbp2	chr14	-	MXE	Spermatocyte
1587	ENSMUSG00000000738	Spg7	chr8	+	MXE	Spermatocyte
1588	ENSMUSG00000003810	Mast2	chr4	-	MXE	Spermatocyte
1589	ENSMUSG00000026279	Thap4	chr1	-	MXE	Spermatocyte
1590	ENSMUSG00000062014	Gmfb	chr14	-	MXE	Spermatocyte
1591	ENSMUSG00000061032	Rrp1	chr10	-	MXE	Spermatocyte
1592	ENSMUSG00000039117	Taf4	chr2	-	MXE	Spermatocyte
1593	ENSMUSG00000035173	Ccdc186	chr19	-	MXE	Spermatocyte
1594	ENSMUSG00000041408	Wapl	chr14	+	MXE	Spermatocyte
1595	ENSMUSG00000026975	Dph7	chr2	+	MXE	Spermatocyte
1596	ENSMUSG00000002109	Ddb2	chr2	-	MXE	Spermatocyte
1597	ENSMUSG00000027900	Dram2	chr3	+	MXE	Spermatocyte
1598	ENSMUSG00000070883	Ccdc173	chr2	-	MXE	Spermatocyte
1599	ENSMUSG00000024875	Yif1a	chr19	+	MXE	Spermatocyte
1600	ENSMUSG00000027422	Rrbp1	chr2	-	MXE	Spermatocyte
1601	ENSMUSG00000042506	Usp22	chr11	-	MXE	Spermatocyte
1602	ENSMUSG00000022064	Pibf1	chr14	+	MXE	Spermatocyte
1603	ENSMUSG00000021374	Nup153	chr13	-	MXE	Spermatocyte
1604	ENSMUSG00000097195	Snhg5	chr9	-	MXE	Spermatocyte
1605	ENSMUSG00000026504	Sdccag8	chr1	+	MXE	Spermatocyte
1606	ENSMUSG00000045411	2410002F23Rik	chr7	+	MXE	Spermatocyte
1607	ENSMUSG00000044573	Acp1	chr12	-	MXE	Spermatocyte
1608	ENSMUSG00000047989	Ino80c	chr18	-	MXE	Spermatocyte
1609	ENSMUSG00000055762	Eef1d	chr15	-	MXE	Spermatocyte
1610	ENSMUSG00000032384	Csnk1g1	chr9	+	MXE	Spermatocyte
1611	ENSMUSG00000030410	Dmwd	chr7	+	MXE	Spermatocyte
1612	ENSMUSG00000025613	Cct8	chr16	-	MXE	Spermatocyte
1613	ENSMUSG00000030850	Ate1	chr7	-	MXE	Spermatocyte
1614	ENSMUSG00000025228	Actr1a	chr19	-	MXE	Spermatocyte
1615	ENSMUSG00000063652	Slc22a21	chr11	-	MXE	Spermatocyte
1616	ENSMUSG00000024251	Thada	chr17	-	MXE	Spermatocyte
1617	ENSMUSG00000056962	Jmjd6	chr11	-	MXE	Spermatocyte
1618	ENSMUSG00000036768	Kif15	chr9	+	MXE	Spermatocyte
1619	ENSMUSG00000020817	Rabep1	chr11	+	MXE	Spermatocyte
1620	ENSMUSG00000004945	Tmem242	chr17	-	MXE	Spermatocyte
1621	ENSMUSG00000071659	Hnrnpul2	chr19	+	MXE	Spermatocyte
1622	ENSMUSG00000037697	Ddhd1	chr14	-	MXE	Spermatocyte
1623	ENSMUSG00000040451	Sgms1	chr19	-	MXE	Spermatocyte
1624	ENSMUSG00000015189	Casd1	chr6	+	MXE	Spermatocyte
1625	ENSMUSG00000036112	Metap2	chr10	-	MXE	Spermatocyte
1626	ENSMUSG00000020115	Tbk1	chr10	-	MXE	Spermatocyte
1627	ENSMUSG00000040774	Cept1	chr3	-	MXE	Spermatocyte
1628	ENSMUSG00000020456	Ogdh	chr11	+	MXE	Spermatocyte
1629	ENSMUSG00000027642	Rpn2	chr2	+	MXE	Spermatocyte
1630	ENSMUSG00000007564	Ppp2r1a	chr17	+	MXE	Spermatocyte
1631	ENSMUSG00000029467	Atp2a2	chr5	-	MXE	Spermatocyte
1632	ENSMUSG00000031596	Slc7a2	chr8	+	MXE	Spermatocyte
1633	ENSMUSG00000006005	Tpr	chr1	+	MXE	Spermatocyte
1634	ENSMUSG00000037012	Hk1	chr10	-	MXE	Spermatocyte
1635	ENSMUSG00000002076	Hsf2bp	chr17	-	MXE	Spermatocyte
1636	ENSMUSG00000022142	Nup155	chr15	+	MXE	Spermatocyte
1637	ENSMUSG00000030691	Fchsd2	chr7	+	MXE	Spermatocyte
1638	ENSMUSG00000086451	4933431K23Rik	chr8	+	MXE	Spermatocyte
1639	ENSMUSG00000025762	Larp1b	chr3	+	MXE	Spermatocyte
1640	ENSMUSG00000030064	Frmd4b	chr6	-	MXE	Spermatocyte
1641	ENSMUSG00000028896	Rcc1	chr4	-	MXE	Spermatocyte
1642	ENSMUSG00000021824	Ap3m1	chr14	-	MXE	Spermatocyte
1643	ENSMUSG00000023010	Tmbim6	chr15	+	MXE	Spermatocyte
1644	ENSMUSG00000040022	Rab11fip2	chr19	-	MXE	Spermatocyte
1645	ENSMUSG00000039128	Cdc123	chr2	-	MXE	Spermatocyte
1646	ENSMUSG00000027309	4930402H24Rik	chr2	-	MXE	Spermatocyte
1647	ENSMUSG00000026020	Nop58	chr1	+	MXE	Spermatocyte
1648	ENSMUSG00000044716	Dok7	chr5	+	MXE	Spermatocyte
1649	ENSMUSG00000021830	Txndc16	chr14	-	MXE	Spermatocyte
1650	ENSMUSG00000033068	Entpd6	chr2	+	MXE	Spermatocyte
1651	ENSMUSG00000021747	4930452B06Rik	chr14	-	MXE	Spermatocyte
1652	ENSMUSG00000020461	Clhc1	chr11	+	MXE	Spermatocyte
1653	ENSMUSG00000022150	Dab2	chr15	+	MXE	Spermatocyte
1654	ENSMUSG00000026469	Xpr1	chr1	-	MXE	Spermatocyte
1655	ENSMUSG00000028563	Tm2d1	chr4	-	MXE	Spermatocyte
1656	ENSMUSG00000026825	Dnm1	chr2	-	MXE	Spermatocyte
1657	ENSMUSG00000028370	Pappa	chr4	+	MXE	Spermatocyte
1658	ENSMUSG00000039458	Mtmr12	chr15	+	MXE	Spermatocyte
1659	ENSMUSG00000032030	Cul5	chr9	-	MXE	Spermatocyte
1660	ENSMUSG00000006315	Tmem147	chr7	-	MXE	Spermatocyte
1661	ENSMUSG00000002280	Narfl	chr17	+	MXE	Spermatocyte
1662	ENSMUSG00000021115	Vrk1	chr12	+	MXE	Spermatocyte
1663	ENSMUSG00000039988	Ankrd13c	chr3	+	MXE	Spermatocyte
1664	ENSMUSG00000018076	Med13l	chr5	+	MXE	Spermatocyte
1665	ENSMUSG00000018565	Elp5	chr11	-	MXE	Spermatocyte
1666	ENSMUSG00000038299	Wdr36	chr18	+	MXE	Spermatocyte
1667	ENSMUSG00000041058	Wwp1	chr4	-	MXE	Spermatocyte
1668	ENSMUSG00000022364	Tbc1d31	chr15	+	MXE	Spermatocyte
1669	ENSMUSG00000048249	Crebrf	chr17	+	MXE	Spermatocyte
1670	ENSMUSG00000025816	Sec61a2	chr2	-	MXE	Spermatocyte
1671	ENSMUSG00000027333	Smox	chr2	+	MXE	Spermatocyte
1672	ENSMUSG00000033149	Phldb2	chr16	-	MXE	Spermatocyte
1673	ENSMUSG00000042705	Commd10	chr18	+	MXE	Spermatocyte
1674	ENSMUSG00000028232	Tmem68	chr4	-	MXE	Spermatocyte
1675	ENSMUSG00000033423	Eri3	chr4	+	MXE	Spermatocyte
1676	ENSMUSG00000003308	Keap1	chr9	-	MXE	Spermatocyte
1677	ENSMUSG00000034252	Senp6	chr9	+	MXE	Spermatocyte
1678	ENSMUSG00000062054	Iah1	chr12	+	MXE	Spermatocyte
1679	ENSMUSG00000071662	Polr2g	chr19	-	MXE	Spermatocyte
1680	ENSMUSG00000036086	Zranb3	chr1	-	MXE	Spermatocyte
1681	ENSMUSG00000020102	Slc16a7	chr10	-	MXE	Spermatocyte
1682	ENSMUSG00000022957	Itsn1	chr16	+	MXE	Spermatocyte
1683	ENSMUSG00000037685	Atp8a1	chr5	-	MXE	Spermatocyte
1684	ENSMUSG00000019818	Cd164	chr10	+	MXE	Spermatocyte
1685	ENSMUSG00000072770	Acrbp	chr6	+	MXE	Spermatocyte
1686	ENSMUSG00000003559	As3mt	chr19	+	MXE	Spermatocyte
1687	ENSMUSG00000062296	Trank1	chr9	+	MXE	Spermatocyte
1688	ENSMUSG00000044791	Setd2	chr9	+	MXE	Spermatocyte
1689	ENSMUSG00000071645	Tut1	chr19	+	MXE	Spermatocyte
1690	ENSMUSG00000034164	Emid1	chr11	-	MXE	Spermatocyte
1691	ENSMUSG00000027955	Fam198b	chr3	+	MXE	Spermatocyte
1692	ENSMUSG00000045205	Dpy19l4	chr4	-	MXE	Spermatocyte
1693	ENSMUSG00000019878	Hsf2	chr10	+	MXE	Spermatocyte
1694	ENSMUSG00000015659	Serac1	chr17	-	MXE	Spermatocyte
1695	ENSMUSG00000033335	Dnm2	chr9	+	MXE	Spermatocyte
1696	ENSMUSG00000022914	Brwd1	chr16	-	MXE	Spermatocyte
1697	ENSMUSG00000043323	Fbrsl1	chr5	-	MXE	Spermatocyte
1698	ENSMUSG00000030447	Cyfip1	chr7	+	MXE	Spermatocyte
1699	ENSMUSG00000031311	Nono	chrX	+	MXE	Spermatocyte
1700	ENSMUSG00000032512	Wdr48	chr9	+	MXE	Spermatocyte
1701	ENSMUSG00000089917	Uckl1	chr2	-	MXE	Spermatocyte
1702	ENSMUSG00000038024	Dennd4c	chr4	+	MXE	Spermatocyte
1703	ENSMUSG00000029814	Igf2bp3	chr6	-	MXE	Spermatocyte
1704	ENSMUSG00000030815	Phkg2	chr7	+	MXE	Spermatocyte
1705	ENSMUSG00000039206	Daglb	chr5	+	MXE	Spermatocyte
1706	ENSMUSG00000022677	Fopnl	chr16	-	MXE	Spermatocyte
1707	ENSMUSG00000038398	Upf3a	chr8	+	MXE	Spermatocyte
1708	ENSMUSG00000022885	St6gal1	chr16	+	MXE	Spermatocyte
1709	ENSMUSG00000028639	Ybx1	chr4	-	MXE	Spermatocyte
1710	ENSMUSG00000037627	Rgs22	chr15	-	MXE	Spermatocyte
1711	ENSMUSG00000049411	Tmem241	chr18	-	MXE	Spermatocyte
1712	ENSMUSG00000035376	Hacd2	chr16	+	MXE	Spermatocyte
1713	ENSMUSG00000001418	Glmp	chr3	+	MXE	Spermatocyte
1714	ENSMUSG00000046707	Csnk2a2	chr8	-	MXE	Spermatocyte
1715	ENSMUSG00000029550	Sppl3	chr5	+	MXE	Spermatocyte
1716	ENSMUSG00000036459	Wtip	chr7	-	MXE	Spermatocyte
1717	ENSMUSG00000026743	Mllt10	chr2	+	MXE	Spermatocyte
1718	ENSMUSG00000020642	Rnf144a	chr12	-	MXE	Spermatocyte
1719	ENSMUSG00000044201	Cdc25c	chr18	-	MXE	Spermatocyte
1720	ENSMUSG00000022200	Golph3	chr15	+	MXE	Spermatocyte
1721	ENSMUSG00000028182	Lrriq3	chr3	+	MXE	Spermatocyte
1722	ENSMUSG00000027091	Zc3h15	chr2	+	MXE	Spermatocyte
1723	ENSMUSG00000024527	Afg3l2	chr18	-	MXE	Spermatocyte
1724	ENSMUSG00000021870	Slmap	chr14	-	MXE	Spermatocyte
1725	ENSMUSG00000045482	Trrap	chr5	+	MXE	Spermatocyte
1726	ENSMUSG00000028034	Fubp1	chr3	+	MXE	Spermatocyte
1727	ENSMUSG00000011658	Fuz	chr7	+	MXE	Spermatocyte
1728	ENSMUSG00000029591	Ung	chr5	+	MXE	Spermatocyte
1729	ENSMUSG00000068758	Il3ra	chr14	+	MXE	Spermatocyte
1730	ENSMUSG00000025373	Rnf41	chr10	+	MXE	Spermatocyte
1731	ENSMUSG00000027201	Myef2	chr2	-	MXE	Spermatocyte
1732	ENSMUSG00000025786	Zdhhc3	chr9	-	MXE	Spermatocyte
1733	ENSMUSG00000054252	Fgfr3	chr5	+	MXE	Spermatocyte
1734	ENSMUSG00000004815	Dgkq	chr5	-	MXE	Spermatocyte
1735	ENSMUSG00000047213	Ythdf3	chr3	+	MXE	Spermatocyte
1736	ENSMUSG00000006476	Nsmf	chr2	+	MXE	Spermatocyte
1737	ENSMUSG00000034401	Spata6	chr4	+	MXE	Spermatocyte
1738	ENSMUSG00000033793	Atp6v1h	chr1	+	MXE	Spermatocyte
1739	ENSMUSG00000032437	Stt3b	chr9	-	MXE	Spermatocyte
1740	ENSMUSG00000046909	Tefm	chr11	-	MXE	Spermatocyte
1741	ENSMUSG00000033701	Acbd6	chr1	+	MXE	Spermatocyte
1742	ENSMUSG00000022983	Scaf4	chr16	-	MXE	Spermatocyte
1743	ENSMUSG00000026761	Orc4	chr2	-	MXE	Spermatocyte
1744	ENSMUSG00000024477	Pggt1b	chr18	-	MXE	Spermatocyte
1745	ENSMUSG00000033732	Sf3b3	chr8	-	MXE	Spermatocyte
1746	ENSMUSG00000052926	Rnaseh2a	chr8	-	MXE	Spermatocyte
1747	ENSMUSG00000032892	Rangrf	chr11	-	MXE	Spermatocyte
1748	ENSMUSG00000024104	Washc2	chr6	+	MXE	Spermatocyte
1749	ENSMUSG00000000131	Xpo6	chr7	-	MXE	Spermatocyte
1750	ENSMUSG00000002428	Hltf	chr3	+	MXE	Spermatocyte
1751	ENSMUSG00000005374	Tbl2	chr5	+	MXE	Spermatocyte
1752	ENSMUSG00000040464	Gtpbp10	chr5	-	MXE	Spermatocyte
1753	ENSMUSG00000037373	Ctbp1	chr5	-	MXE	Spermatocyte
1754	ENSMUSG00000028070	Naxe	chr3	-	MXE	Spermatocyte
1755	ENSMUSG00000025153	Fasn	chr11	-	MXE	Spermatocyte
1756	ENSMUSG00000053119	Chmp3	chr6	+	MXE	Spermatocyte
1757	ENSMUSG00000034342	Cbl	chr9	-	MXE	Spermatocyte
1758	ENSMUSG00000022789	Dnm1l	chr16	-	MXE	Spermatocyte
1759	ENSMUSG00000025584	Pde8a	chr7	+	MXE	Spermatocyte
1760	ENSMUSG00000021432	Slc35b3	chr13	-	MXE	Spermatocyte
1761	ENSMUSG00000018583	G3bp1	chr11	+	MXE	Spermatocyte
1762	ENSMUSG00000028391	Wdr31	chr4	-	MXE	Spermatocyte
1763	ENSMUSG00000034135	Sik3	chr9	+	MXE	Spermatocyte
1764	ENSMUSG00000024357	Sil1	chr18	-	MXE	Spermatocyte
1765	ENSMUSG00000032359	Ctsh	chr9	+	MXE	Spermatocyte
1766	ENSMUSG00000034413	Neurl1b	chr17	+	MXE	Spermatocyte
1767	ENSMUSG00000021764	Ndufs4	chr13	-	MXE	Spermatocyte
1768	ENSMUSG00000026566	Mpzl1	chr1	-	MXE	Spermatocyte
1769	ENSMUSG00000031987	Egln1	chr8	-	MXE	Spermatocyte
1770	ENSMUSG00000035642	Aamdc	chr7	-	MXE	Spermatocyte
1771	ENSMUSG00000001120	Pcbp3	chr10	-	MXE	Spermatocyte
1772	ENSMUSG00000017843	Ppp2r5c	chr12	+	MXE	Spermatocyte
1773	ENSMUSG00000078765	U2af1l4	chr7	+	MXE	Spermatocyte
1774	ENSMUSG00000037523	Mavs	chr2	+	MXE	Spermatocyte
1775	ENSMUSG00000038122	Tbc1d32	chr10	-	MXE	Spermatocyte
1776	ENSMUSG00000021901	Bap1	chr14	+	MXE	Spermatocyte
1777	ENSMUSG00000031024	St5	chr7	-	MXE	Spermatocyte
1778	ENSMUSG00000035401	Emsy	chr7	-	MXE	Spermatocyte
1779	ENSMUSG00000024293	Esco1	chr18	-	MXE	Spermatocyte
1780	ENSMUSG00000022472	Desi1	chr15	-	MXE	Spermatocyte
1781	ENSMUSG00000055322	Tns1	chr1	-	MXE	Spermatocyte
1782	ENSMUSG00000020532	Acaca	chr11	+	MXE	Spermatocyte
1783	ENSMUSG00000025538	Sumf2	chr5	+	MXE	Spermatocyte
1784	ENSMUSG00000020590	Snx13	chr12	+	MXE	Spermatocyte
1785	ENSMUSG00000024410	3110002H16Rik	chr18	+	MXE	Spermatocyte
1786	ENSMUSG00000055862	Izumo4	chr10	+	MXE	Spermatocyte
1787	ENSMUSG00000031753	Cog4	chr8	+	MXE	Spermatocyte
1788	ENSMUSG00000070871	Ccnyl1	chr1	+	MXE	Spermatocyte
1789	ENSMUSG00000042688	Mapk6	chr9	-	MXE	Spermatocyte
1790	ENSMUSG00000024937	Ehbp1l1	chr19	-	MXE	Spermatocyte
1791	ENSMUSG00000031922	Cep57	chr9	-	MXE	Spermatocyte
1792	ENSMUSG00000020268	Lyrm7	chr11	-	MXE	Spermatocyte
1793	ENSMUSG00000040548	Tex2	chr11	-	MXE	Spermatocyte
1794	ENSMUSG00000033991	Ttc37	chr13	+	MXE	Spermatocyte
1795	ENSMUSG00000028820	Sfpq	chr4	+	MXE	Spermatocyte
1796	ENSMUSG00000002602	Axl	chr7	-	MXE	Spermatocyte
1797	ENSMUSG00000032294	Pkm	chr9	+	MXE	Spermatocyte
1798	ENSMUSG00000054400	Cklf	chr8	+	MXE	Spermatocyte
1799	ENSMUSG00000005882	Uqcc1	chr2	-	MXE	Spermatocyte
1800	ENSMUSG00000030557	Mef2a	chr7	-	MXE	Spermatocyte
1801	ENSMUSG00000027439	Gzf1	chr2	+	MXE	Spermatocyte
1802	ENSMUSG00000014668	Chfr	chr5	+	MXE	Spermatocyte
1803	ENSMUSG00000039298	Cdk5rap2	chr4	-	MXE	Spermatocyte
1804	ENSMUSG00000027455	Nsfl1c	chr2	+	MXE	Spermatocyte
1805	ENSMUSG00000029687	Ezh2	chr6	-	MXE	Spermatocyte
1806	ENSMUSG00000023935	Spats1	chr17	-	MXE	Spermatocyte
1807	ENSMUSG00000028687	Mutyh	chr4	+	MXE	Spermatocyte
1808	ENSMUSG00000024862	Klc2	chr19	-	MXE	Spermatocyte
1809	ENSMUSG00000027002	Nckap1	chr2	-	MXE	Spermatocyte
1810	ENSMUSG00000033216	Eefsec	chr6	-	MXE	Spermatocyte
1811	ENSMUSG00000075703	Selenoi	chr5	+	MXE	Spermatocyte
1812	ENSMUSG00000022151	Ttc33	chr15	+	MXE	Spermatocyte
1813	ENSMUSG00000004661	Arid3b	chr9	-	MXE	Spermatocyte
1814	ENSMUSG00000026150	Mff	chr1	+	MXE	Spermatocyte
1815	ENSMUSG00000021514	Zfp369	chr13	+	MXE	Spermatocyte
1816	ENSMUSG00000019943	Atp2b1	chr10	+	MXE	Spermatocyte
1817	ENSMUSG00000032396	Dis3l	chr9	-	MXE	Spermatocyte
1818	ENSMUSG00000032777	Gtf3c1	chr7	-	MXE	Spermatocyte
1819	ENSMUSG00000034566	Atp5h	chr11	-	MXE	Spermatocyte
1820	ENSMUSG00000026491	Ahctf1	chr1	-	MXE	Spermatocyte
1821	ENSMUSG00000022246	Rai14	chr15	-	MXE	Spermatocyte
1822	ENSMUSG00000032064	Dixdc1	chr9	-	MXE	Spermatocyte
1823	ENSMUSG00000024317	Rnf138	chr18	+	MXE	Spermatocyte
1824	ENSMUSG00000000823	Zfp512b	chr2	-	MXE	Spermatocyte
1825	ENSMUSG00000002833	Hdgfl2	chr17	+	MXE	Spermatocyte
1826	ENSMUSG00000028098	Rnf115	chr3	+	MXE	Spermatocyte
1827	ENSMUSG00000021254	Gpatch2l	chr12	+	MXE	Spermatocyte
1828	ENSMUSG00000092203	1110038B12Rik	chr17	-	MXE	Spermatocyte
1829	ENSMUSG00000026767	Mindy3	chr2	-	MXE	Spermatocyte
1830	ENSMUSG00000022407	Adsl	chr15	+	MXE	Spermatocyte
1831	ENSMUSG00000055065	Ddx17	chr15	-	MXE	Spermatocyte
1832	ENSMUSG00000072946	Ptgr2	chr12	+	MXE	Spermatocyte
1833	ENSMUSG00000033434	Gtpbp6	chr5	-	MXE	Spermatocyte
1834	ENSMUSG00000039242	B3galnt2	chr13	+	MXE	Spermatocyte
1835	ENSMUSG00000030022	Adamts9	chr6	-	MXE	Spermatocyte
1836	ENSMUSG00000049106	Dcaf5	chr12	-	MXE	Spermatocyte
1837	ENSMUSG00000027998	Plrg1	chr3	+	MXE	Spermatocyte
1838	ENSMUSG00000034377	Tulp4	chr17	+	MXE	Spermatocyte
1839	ENSMUSG00000052752	Traf7	chr17	-	MXE	Spermatocyte
1840	ENSMUSG00000043909	Trp53bp1	chr2	-	MXE	Spermatocyte
1841	ENSMUSG00000015083	C8g	chr2	-	MXE	Spermatocyte
1842	ENSMUSG00000020454	Eif4enif1	chr11	+	MXE	Spermatocyte
1843	ENSMUSG00000039068	Zzz3	chr3	+	MXE	Spermatocyte
1844	ENSMUSG00000052337	Immt	chr6	+	MXE	Spermatocyte
1845	ENSMUSG00000047215	Rpl9	chr5	-	MXE	Spermatocyte
1846	ENSMUSG00000006191	Cdkal1	chr13	-	MXE	Spermatocyte
1847	ENSMUSG00000028274	Rngtt	chr4	+	MXE	Spermatocyte
1848	ENSMUSG00000023971	Rrp36	chr17	-	MXE	Spermatocyte
1849	ENSMUSG00000028062	Lamtor2	chr3	-	MXE	Spermatocyte
1850	ENSMUSG00000063488	Zkscan7	chr9	+	MXE	Spermatocyte
1851	ENSMUSG00000020697	Lig3	chr11	+	MXE	Spermatocyte
1852	ENSMUSG00000006732	Mettl1	chr10	+	MXE	Spermatocyte
1853	ENSMUSG00000001998	Ap4e1	chr2	+	MXE	Spermatocyte
1854	ENSMUSG00000007411	Mark3	chr12	+	MXE	Spermatocyte
1855	ENSMUSG00000058704	Memo1	chr17	-	MXE	Spermatocyte
1856	ENSMUSG00000042590	Ipo11	chr13	-	MXE	Spermatocyte
1857	ENSMUSG00000110234	Gm45799	chr7	+	MXE	Spermatocyte
1858	ENSMUSG00000003269	Cyth2	chr7	-	MXE	Spermatocyte
1859	ENSMUSG00000021952	Xpo4	chr14	-	MXE	Spermatocyte
1860	ENSMUSG00000030613	Ccdc90b	chr7	+	MXE	Spermatocyte
1861	ENSMUSG00000032582	Rbm6	chr9	-	MXE	Spermatocyte
1862	ENSMUSG00000032615	Nt5m	chr11	+	MXE	Spermatocyte
1863	ENSMUSG00000030189	Ybx3	chr6	-	MXE	Spermatocyte
1864	ENSMUSG00000026034	Clk1	chr1	-	MXE	Spermatocyte
1865	ENSMUSG00000064036	Mro	chr18	+	MXE	Spermatocyte
1866	ENSMUSG00000040690	Col16a1	chr4	+	MXE	Spermatocyte
1867	ENSMUSG00000024943	Smc5	chr19	-	MXE	Spermatocyte
1868	ENSMUSG00000034118	Tpst1	chr5	+	MXE	Spermatocyte
1869	ENSMUSG00000035770	Dync1li2	chr8	-	MXE	Spermatocyte
1870	ENSMUSG00000046230	Vps13a	chr19	-	MXE	Spermatocyte
1871	ENSMUSG00000029221	Slc30a9	chr5	+	MXE	Spermatocyte
1872	ENSMUSG00000032966	Fkbp1a	chr2	+	MXE	Spermatocyte
1873	ENSMUSG00000026103	Gls	chr1	-	MXE	Spermatocyte
1874	ENSMUSG00000022477	Aco2	chr15	+	MXE	Spermatocyte
1875	ENSMUSG00000020193	Zpbp	chr11	-	MXE	Spermatocyte
1876	ENSMUSG00000034075	Zdhhc5	chr2	-	MXE	Spermatocyte
1877	ENSMUSG00000037458	Azin1	chr15	-	MXE	Spermatocyte
1878	ENSMUSG00000040586	Ofd1	chrX	-	MXE	Spermatocyte
1879	ENSMUSG00000029836	Cbx3	chr6	+	MXE	Spermatocyte
1880	ENSMUSG00000055531	Cpsf6	chr10	-	MXE	Spermatocyte
1881	ENSMUSG00000057858	Fam204a	chr19	-	MXE	Spermatocyte
1882	ENSMUSG00000021112	Mpp5	chr12	+	MXE	Spermatocyte
1883	ENSMUSG00000008892	Vdac3	chr8	-	MXE	Spermatocyte
1884	ENSMUSG00000058301	Upf1	chr8	-	MXE	Spermatocyte
1885	ENSMUSG00000026790	Odf2	chr2	+	MXE	Spermatocyte
1886	ENSMUSG00000030323	Ift122	chr6	+	MXE	Spermatocyte
1887	ENSMUSG00000017664	Slc35c2	chr2	-	MXE	Spermatocyte
1888	ENSMUSG00000040225	Prrc2c	chr1	-	MXE	Spermatocyte
1889	ENSMUSG00000060261	Gtf2i	chr5	-	MXE	Spermatocyte
1890	ENSMUSG00000053070	9230110C19Rik	chr9	-	MXE	Spermatocyte
1891	ENSMUSG00000058997	Vwa8	chr14	+	MXE	Spermatocyte
1892	ENSMUSG00000030870	Ubfd1	chr7	+	MXE	Spermatocyte
1893	ENSMUSG00000042185	Nfrkb	chr9	+	MXE	Spermatocyte
1894	ENSMUSG00000038264	Sema7a	chr9	+	MXE	Spermatocyte
1895	ENSMUSG00000054051	Ercc6	chr14	+	MXE	Spermatocyte
1896	ENSMUSG00000058388	Phtf1	chr3	+	MXE	Spermatocyte
1897	ENSMUSG00000028107	Tars2	chr3	-	MXE	Spermatocyte
1898	ENSMUSG00000089872	Rps6kc1	chr1	-	MXE	Spermatocyte
1899	ENSMUSG00000033808	Tmem87a	chr2	-	MXE	Spermatocyte
1900	ENSMUSG00000038365	Fbxo25	chr8	+	MXE	Spermatocyte
1901	ENSMUSG00000026554	Dcaf8	chr1	+	MXE	Spermatocyte
1902	ENSMUSG00000026021	Sumo1	chr1	-	MXE	Spermatocyte
1903	ENSMUSG00000058835	Abi1	chr2	-	MXE	Spermatocyte
1904	ENSMUSG00000031153	Gripap1	chrX	+	MXE	Spermatocyte
1905	ENSMUSG00000036817	Sun1	chr5	+	MXE	Spermatocyte
1906	ENSMUSG00000017176	Nt5c3b	chr11	-	MXE	Spermatocyte
1907	ENSMUSG00000025745	Hadha	chr5	-	MXE	Spermatocyte
1908	ENSMUSG00000024462	Gabbr1	chr17	+	MXE	Spermatocyte
1909	ENSMUSG00000016933	Plcg1	chr2	+	MXE	Spermatocyte
1910	ENSMUSG00000066036	Ubr4	chr4	+	MXE	Spermatocyte
1911	ENSMUSG00000034681	Rnps1	chr17	+	MXE	Spermatocyte
1912	ENSMUSG00000063450	Syne2	chr12	+	MXE	Spermatocyte
1913	ENSMUSG00000027598	Itch	chr2	+	MXE	Spermatocyte
1914	ENSMUSG00000040594	Ranbp17	chr11	-	MXE	Spermatocyte
1915	ENSMUSG00000021947	Cryl1	chr14	-	MXE	Spermatocyte
1916	ENSMUSG00000016918	Sulf1	chr1	+	MXE	Spermatocyte
1917	ENSMUSG00000017146	Brca1	chr11	-	MXE	Spermatocyte
1918	ENSMUSG00000026098	Pms1	chr1	-	MXE	Spermatocyte
1919	ENSMUSG00000060376	Bckdha	chr7	-	MXE	Spermatocyte
1920	ENSMUSG00000017715	Pgs1	chr11	+	MXE	Spermatocyte
1921	ENSMUSG00000032827	Ppp1r9a	chr6	+	MXE	Spermatocyte
1922	ENSMUSG00000023150	Ivns1abp	chr1	+	MXE	Spermatocyte
1923	ENSMUSG00000057363	Uxs1	chr1	-	MXE	Spermatocyte
1924	ENSMUSG00000039230	Tbcd	chr11	+	MXE	Spermatocyte
1925	ENSMUSG00000001829	Clpb	chr7	+	MXE	Spermatocyte
1926	ENSMUSG00000028158	Mttp	chr3	-	MXE	Spermatocyte
1927	ENSMUSG00000032342	Mto1	chr9	+	MXE	Spermatocyte
1928	ENSMUSG00000039968	Rsbn1l	chr5	-	MXE	Spermatocyte
1929	ENSMUSG00000029433	Diablo	chr5	-	MXE	Spermatocyte
1930	ENSMUSG00000035934	Pknox2	chr9	-	MXE	Spermatocyte
1931	ENSMUSG00000017421	Zfp207	chr11	+	MXE	Spermatocyte
1932	ENSMUSG00000037646	Vps13b	chr15	+	MXE	Spermatocyte
1933	ENSMUSG00000022843	Clcn2	chr16	-	MXE	Spermatocyte
1934	ENSMUSG00000021519	Mterf3	chr13	-	MXE	Spermatocyte
1935	ENSMUSG00000035674	Ndufa3	chr7	+	MXE	Spermatocyte
1936	ENSMUSG00000037031	Tspan15	chr10	-	MXE	Spermatocyte
1937	ENSMUSG00000036502	Tmem255a	chrX	-	MXE	Spermatocyte
1938	ENSMUSG00000024222	Fkbp5	chr17	-	MXE	Spermatocyte
1939	ENSMUSG00000037262	Kin	chr2	+	MXE	Spermatocyte
1940	ENSMUSG00000031976	Urb2	chr8	+	MXE	Spermatocyte
1941	ENSMUSG00000018548	Trim37	chr11	+	MXE	Spermatocyte
1942	ENSMUSG00000024068	Spast	chr17	+	MXE	Spermatocyte
1943	ENSMUSG00000016458	Wt1	chr2	+	MXE	Spermatocyte
1944	ENSMUSG00000026482	Rgl1	chr1	-	MXE	Spermatocyte
1945	ENSMUSG00000023088	Abcc1	chr16	+	MXE	Spermatocyte
1946	ENSMUSG00000040725	Hnrnpul1	chr7	-	MXE	Spermatocyte
1947	ENSMUSG00000062270	Morf4l1	chr9	-	MXE	Spermatocyte
1948	ENSMUSG00000042515	Mum1l1	chrX	+	MXE	Spermatocyte
1949	ENSMUSG00000061882	Ccdc62	chr5	+	MXE	Spermatocyte
1950	ENSMUSG00000020694	Tlk2	chr11	+	MXE	Spermatocyte
1951	ENSMUSG00000026887	Mrrf	chr2	+	MXE	Spermatocyte
1952	ENSMUSG00000023106	Denr	chr5	+	MXE	Spermatocyte
1953	ENSMUSG00000028837	Psmb2	chr4	+	MXE	Spermatocyte
1954	ENSMUSG00000031864	Ints10	chr8	+	MXE	Spermatocyte
1955	ENSMUSG00000037337	Map4k1	chr7	+	MXE	Spermatocyte
1956	ENSMUSG00000034940	Synrg	chr11	+	MXE	Spermatocyte
1957	ENSMUSG00000023923	Tbc1d5	chr17	-	MXE	Spermatocyte
1958	ENSMUSG00000028948	Nol9	chr4	+	MXE	Spermatocyte
1959	ENSMUSG00000028207	Asph	chr4	-	MXE	Spermatocyte
1960	ENSMUSG00000029283	Cdc7	chr5	+	MXE	Spermatocyte
1961	ENSMUSG00000032295	Man2c1	chr9	+	MXE	Spermatocyte
1962	ENSMUSG00000021686	Ap3b1	chr13	+	MXE	Spermatocyte
1963	ENSMUSG00000022378	Fam49b	chr15	-	MXE	Spermatocyte
1964	ENSMUSG00000021276	Cinp	chr12	-	MXE	Spermatocyte
1965	ENSMUSG00000018761	Mpdu1	chr11	-	MXE	Spermatocyte
1966	ENSMUSG00000012609	Ttll5	chr12	+	MXE	Spermatocyte
1967	ENSMUSG00000018995	Nars2	chr7	+	MXE	Spermatocyte
1968	ENSMUSG00000038535	Zfp280d	chr9	+	MXE	Spermatocyte
1969	ENSMUSG00000027287	Snap23	chr2	+	MXE	Spermatocyte
1970	ENSMUSG00000021156	Zmynd11	chr13	-	MXE	Spermatocyte
1971	ENSMUSG00000044712	Slc38a6	chr12	+	MXE	Spermatocyte
1972	ENSMUSG00000022201	Zfr	chr15	+	MXE	Spermatocyte
1973	ENSMUSG00000014355	Anapc1	chr2	-	MXE	Spermatocyte
1974	ENSMUSG00000021595	Nsun2	chr13	+	MXE	Spermatocyte
1975	ENSMUSG00000038022	Mindy4	chr6	+	MXE	Spermatocyte
1976	ENSMUSG00000030741	Spns1	chr7	-	MXE	Spermatocyte
1977	ENSMUSG00000019978	Epb41l2	chr10	+	MXE	Spermatocyte
1978	ENSMUSG00000030704	Rab6a	chr7	+	MXE	Spermatocyte
1979	ENSMUSG00000067713	Prkag1	chr15	-	MXE	Spermatocyte
1980	ENSMUSG00000022332	Khdrbs3	chr15	+	MXE	Spermatocyte
1981	ENSMUSG00000027708	Dcun1d1	chr3	-	MXE	Spermatocyte
1982	ENSMUSG00000022475	Hdac7	chr15	-	MXE	Spermatocyte
1983	ENSMUSG00000024539	Ptpn2	chr18	-	MXE	Spermatocyte
1984	ENSMUSG00000057133	Chd6	chr2	-	MXE	Spermatocyte
1985	ENSMUSG00000023977	Ubr2	chr17	-	MXE	Spermatocyte
1986	ENSMUSG00000020776	Fbf1	chr11	-	MXE	Spermatocyte
1987	ENSMUSG00000058318	Phf21a	chr2	+	MXE	Spermatocyte
1988	ENSMUSG00000027305	Ndufaf1	chr2	-	MXE	Spermatocyte
1989	ENSMUSG00000031586	Rbpms	chr8	-	MXE	Spermatocyte
1990	ENSMUSG00000043872	Zmym1	chr4	-	MXE	Spermatocyte
1991	ENSMUSG00000004798	Ulk2	chr11	-	MXE	Spermatocyte
1992	ENSMUSG00000036743	Psma8	chr18	+	MXE	Spermatocyte
1993	ENSMUSG00000023456	Tpi1	chr6	-	MXE	Spermatocyte
1994	ENSMUSG00000020458	Rtn4	chr11	+	MXE	Spermatocyte
1995	ENSMUSG00000054387	Mdm4	chr1	-	MXE	Spermatocyte
1996	ENSMUSG00000019791	Hint3	chr10	-	MXE	Spermatocyte
1997	ENSMUSG00000037418	Best1	chr19	-	MXE	Spermatocyte
1998	ENSMUSG00000061533	Cep128	chr12	-	MXE	Spermatocyte
[truncated: 3,352 more rows]

## Sheet: Round
ID	GeneID	geneSymbol	chr	strand	Alternative splicing type	Development stage
0	ENSMUSG00000028464	Tpm2	chr4	-	A3SS	Round spermatid
1	ENSMUSG00000066026	Dhrs3	chr4	+	A3SS	Round spermatid
2	ENSMUSG00000020486	Sept4	chr11	+	A3SS	Round spermatid
3	ENSMUSG00000032580	Rbm5	chr9	-	A3SS	Round spermatid
4	ENSMUSG00000028741	Mrto4	chr4	-	A3SS	Round spermatid
5	ENSMUSG00000027206	Cops2	chr2	-	A3SS	Round spermatid
6	ENSMUSG00000026159	Agfg1	chr1	+	A3SS	Round spermatid
7	ENSMUSG00000070733	Fryl	chr5	-	A3SS	Round spermatid
8	ENSMUSG00000032366	Tpm1	chr9	-	A3SS	Round spermatid
9	ENSMUSG00000033382	Trappc8	chr18	-	A3SS	Round spermatid
10	ENSMUSG00000033365	Ipo13	chr4	-	A3SS	Round spermatid
11	ENSMUSG00000053877	Srcap	chr7	+	A3SS	Round spermatid
12	ENSMUSG00000033060	Lmo7	chr14	+	A3SS	Round spermatid
13	ENSMUSG00000038685	Rtel1	chr2	+	A3SS	Round spermatid
14	ENSMUSG00000041459	Tardbp	chr4	-	A3SS	Round spermatid
15	ENSMUSG00000020721	Helz	chr11	+	A3SS	Round spermatid
16	ENSMUSG00000034973	Dopey1	chr9	+	A3SS	Round spermatid
17	ENSMUSG00000040410	Fbxl4	chr4	+	A3SS	Round spermatid
18	ENSMUSG00000068922	Msto1	chr3	-	A3SS	Round spermatid
19	ENSMUSG00000079557	March2	chr17	-	A3SS	Round spermatid
20	ENSMUSG00000000339	Rtca	chr3	-	A3SS	Round spermatid
21	ENSMUSG00000023345	Poc1a	chr9	+	A3SS	Round spermatid
22	ENSMUSG00000029670	Ing3	chr6	+	A3SS	Round spermatid
23	ENSMUSG00000028392	Bspry	chr4	+	A3SS	Round spermatid
24	ENSMUSG00000029422	Rsrc2	chr5	-	A3SS	Round spermatid
25	ENSMUSG00000020198	Ap3d1	chr10	-	A3SS	Round spermatid
26	ENSMUSG00000045409	Trim39	chr17	-	A3SS	Round spermatid
27	ENSMUSG00000030067	Foxp1	chr6	-	A3SS	Round spermatid
28	ENSMUSG00000063889	Crem	chr18	-	A3SS	Round spermatid
29	ENSMUSG00000032340	Neo1	chr9	-	A3SS	Round spermatid
30	ENSMUSG00000034160	Ogt	chrX	+	A3SS	Round spermatid
31	ENSMUSG00000022185	Acin1	chr14	-	A3SS	Round spermatid
32	ENSMUSG00000042831	Alkbh6	chr7	+	A3SS	Round spermatid
33	ENSMUSG00000020328	Nudcd2	chr11	+	A3SS	Round spermatid
34	ENSMUSG00000025607	Copg2	chr6	-	A3SS	Round spermatid
35	ENSMUSG00000045983	Eif4g1	chr16	+	A3SS	Round spermatid
36	ENSMUSG00000024908	Ppp6r3	chr19	-	A3SS	Round spermatid
37	ENSMUSG00000032637	Atxn2l	chr7	-	A3SS	Round spermatid
38	ENSMUSG00000045078	Rnf216	chr5	-	A3SS	Round spermatid
39	ENSMUSG00000058135	Gstm1	chr3	-	A3SS	Round spermatid
40	ENSMUSG00000037266	Rsrp1	chr4	+	A3SS	Round spermatid
41	ENSMUSG00000015937	H2afy	chr13	-	A3SS	Round spermatid
42	ENSMUSG00000044320	1700001O22Rik	chr2	-	A3SS	Round spermatid
43	ENSMUSG00000039449	Prpf18	chr2	-	A3SS	Round spermatid
44	ENSMUSG00000052331	Ankrd44	chr1	-	A3SS	Round spermatid
45	ENSMUSG00000020952	Scfd1	chr12	+	A3SS	Round spermatid
46	ENSMUSG00000040356	Skiv2l	chr17	-	A3SS	Round spermatid
47	ENSMUSG00000060216	Arrb2	chr11	+	A3SS	Round spermatid
48	ENSMUSG00000039382	Wdr45	chrX	+	A3SS	Round spermatid
49	ENSMUSG00000022770	Dlg1	chr16	+	A3SS	Round spermatid
50	ENSMUSG00000029068	Ccnl2	chr4	+	A3SS	Round spermatid
51	ENSMUSG00000026466	Tor1aip1	chr1	-	A3SS	Round spermatid
52	ENSMUSG00000038671	Arfrp1	chr2	-	A3SS	Round spermatid
53	ENSMUSG00000025486	Sirt3	chr7	-	A3SS	Round spermatid
54	ENSMUSG00000035478	Mbd3	chr10	-	A3SS	Round spermatid
55	ENSMUSG00000047793	Sned1	chr1	+	A3SS	Round spermatid
56	ENSMUSG00000032815	Fanca	chr8	-	A3SS	Round spermatid
57	ENSMUSG00000027751	Supt20	chr3	+	A3SS	Round spermatid
58	ENSMUSG00000028582	Cc2d1b	chr4	+	A3SS	Round spermatid
59	ENSMUSG00000026082	Rev1	chr1	-	A3SS	Round spermatid
60	ENSMUSG00000090841	Myl6	chr10	-	A3SS	Round spermatid
61	ENSMUSG00000028049	Scamp3	chr3	+	A3SS	Round spermatid
62	ENSMUSG00000022119	Rbm26	chr14	-	A3SS	Round spermatid
63	ENSMUSG00000031715	Smarca5	chr8	-	A3SS	Round spermatid
64	ENSMUSG00000074165	Zfp788	chr7	+	A3SS	Round spermatid
65	ENSMUSG00000005682	Pan2	chr10	+	A3SS	Round spermatid
66	ENSMUSG00000037364	Srrt	chr5	-	A3SS	Round spermatid
67	ENSMUSG00000028256	Odf2l	chr3	+	A3SS	Round spermatid
68	ENSMUSG00000062743	Zfp677	chr17	+	A3SS	Round spermatid
69	ENSMUSG00000036948	BC037034	chr5	-	A3SS	Round spermatid
70	ENSMUSG00000026584	Scyl3	chr1	+	A3SS	Round spermatid
71	ENSMUSG00000001376	Vps50	chr6	+	A3SS	Round spermatid
72	ENSMUSG00000018474	Chd3	chr11	-	A3SS	Round spermatid
73	ENSMUSG00000028484	Psip1	chr4	-	A3SS	Round spermatid
74	ENSMUSG00000021428	Riok1	chr13	+	A3SS	Round spermatid
75	ENSMUSG00000004677	Myo9b	chr8	+	A3SS	Round spermatid
76	ENSMUSG00000026004	Kansl1l	chr1	-	A3SS	Round spermatid
77	ENSMUSG00000052656	Rnf103	chr6	+	A3SS	Round spermatid
78	ENSMUSG00000038412	Higd1a	chr9	-	A3SS	Round spermatid
79	ENSMUSG00000018570	2810408A11Rik	chr11	-	A3SS	Round spermatid
80	ENSMUSG00000053477	Tcf4	chr18	+	A3SS	Round spermatid
81	ENSMUSG00000040667	Nup88	chr11	-	A3SS	Round spermatid
82	ENSMUSG00000002105	Slc39a13	chr2	-	A3SS	Round spermatid
83	ENSMUSG00000024906	Mus81	chr19	-	A3SS	Round spermatid
84	ENSMUSG00000018861	Fdxr	chr11	-	A3SS	Round spermatid
85	ENSMUSG00000030231	Plekha5	chr6	+	A3SS	Round spermatid
86	ENSMUSG00000036893	Ehmt1	chr2	-	A3SS	Round spermatid
87	ENSMUSG00000002297	Dbf4	chr5	-	A3SS	Round spermatid
88	ENSMUSG00000025793	Hgs	chr11	+	A3SS	Round spermatid
89	ENSMUSG00000037138	Aff3	chr1	-	A3SS	Round spermatid
90	ENSMUSG00000002395	Use1	chr8	+	A3SS	Round spermatid
91	ENSMUSG00000037426	Depdc5	chr5	+	A3SS	Round spermatid
92	ENSMUSG00000004221	Ikbkg	chrX	+	A3SS	Round spermatid
93	ENSMUSG00000021431	Snrnp48	chr13	+	A3SS	Round spermatid
94	ENSMUSG00000021905	Dph3	chr14	-	A3SS	Round spermatid
95	ENSMUSG00000047417	Rexo1	chr10	-	A3SS	Round spermatid
96	ENSMUSG00000034758	Tle6	chr10	-	A3SS	Round spermatid
97	ENSMUSG00000030689	Ino80e	chr7	-	A3SS	Round spermatid
98	ENSMUSG00000012535	Tnpo3	chr6	-	A3SS	Round spermatid
99	ENSMUSG00000029141	Slc4a1ap	chr5	+	A3SS	Round spermatid
100	ENSMUSG00000021819	Zswim8	chr14	+	A3SS	Round spermatid
101	ENSMUSG00000027466	Rbck1	chr2	-	A3SS	Round spermatid
102	ENSMUSG00000036779	Papd5	chr8	+	A3SS	Round spermatid
103	ENSMUSG00000023079	Gtf2ird1	chr5	-	A3SS	Round spermatid
104	ENSMUSG00000030814	Bcl7c	chr7	-	A3SS	Round spermatid
105	ENSMUSG00000029016	Clcn6	chr4	-	A3SS	Round spermatid
106	ENSMUSG00000002804	Nudt14	chr12	-	A3SS	Round spermatid
107	ENSMUSG00000068329	Htra2	chr6	-	A3SS	Round spermatid
108	ENSMUSG00000040785	Ttc3	chr16	+	A3SS	Round spermatid
109	ENSMUSG00000000037	Scml2	chrX	+	A3SS	Round spermatid
110	ENSMUSG00000026090	2010300C02Rik	chr1	-	A3SS	Round spermatid
111	ENSMUSG00000024795	Kif20b	chr19	+	A3SS	Round spermatid
112	ENSMUSG00000031516	Dctn6	chr8	-	A3SS	Round spermatid
113	ENSMUSG00000030846	Tial1	chr7	-	A3SS	Round spermatid
114	ENSMUSG00000031667	Aktip	chr8	-	A3SS	Round spermatid
115	ENSMUSG00000026798	Coq4	chr2	+	A3SS	Round spermatid
116	ENSMUSG00000025437	Usp33	chr3	+	A3SS	Round spermatid
117	ENSMUSG00000033985	Tesk2	chr4	+	A3SS	Round spermatid
118	ENSMUSG00000028273	Pdlim5	chr3	-	A3SS	Round spermatid
119	ENSMUSG00000035569	Ankrd11	chr8	-	A3SS	Round spermatid
120	ENSMUSG00000045672	Col27a1	chr4	+	A3SS	Round spermatid
121	ENSMUSG00000021235	Coq6	chr12	+	A3SS	Round spermatid
122	ENSMUSG00000001909	Trmt1	chr8	+	A3SS	Round spermatid
123	ENSMUSG00000034724	Cnot6l	chr5	-	A3SS	Round spermatid
124	ENSMUSG00000019373	Cops3	chr11	-	A3SS	Round spermatid
125	ENSMUSG00000001441	Npepps	chr11	-	A3SS	Round spermatid
126	ENSMUSG00000027624	Epb41l1	chr2	+	A3SS	Round spermatid
127	ENSMUSG00000046432	Bex3	chrX	+	A3SS	Round spermatid
128	ENSMUSG00000004626	Stxbp2	chr8	+	A3SS	Round spermatid
129	ENSMUSG00000037904	Ankrd9	chr12	-	A3SS	Round spermatid
130	ENSMUSG00000041351	Rap1gap	chr4	+	A3SS	Round spermatid
131	ENSMUSG00000026977	March7	chr2	+	A3SS	Round spermatid
132	ENSMUSG00000029145	Eif2b4	chr5	-	A3SS	Round spermatid
133	ENSMUSG00000038346	Zfp384	chr6	+	A3SS	Round spermatid
134	ENSMUSG00000030638	Sh3gl3	chr7	+	A3SS	Round spermatid
135	ENSMUSG00000030706	Mrpl48	chr7	-	A3SS	Round spermatid
136	ENSMUSG00000031171	Ftsj1	chrX	-	A3SS	Round spermatid
137	ENSMUSG00000040455	Usp45	chr4	+	A3SS	Round spermatid
138	ENSMUSG00000034813	Grip1	chr10	+	A3SS	Round spermatid
139	ENSMUSG00000032567	Aste1	chr9	+	A3SS	Round spermatid
140	ENSMUSG00000030271	Ogg1	chr6	+	A3SS	Round spermatid
141	ENSMUSG00000025616	Usp16	chr16	+	A3SS	Round spermatid
142	ENSMUSG00000030269	Mtmr14	chr6	+	A3SS	Round spermatid
143	ENSMUSG00000036503	Rnf13	chr3	+	A3SS	Round spermatid
144	ENSMUSG00000021694	Ercc8	chr13	+	A3SS	Round spermatid
145	ENSMUSG00000031314	Taf1	chrX	+	A3SS	Round spermatid
146	ENSMUSG00000026821	Ralgds	chr2	+	A3SS	Round spermatid
147	ENSMUSG00000029705	Cux1	chr5	-	A3SS	Round spermatid
148	ENSMUSG00000090266	Mettl23	chr11	+	A3SS	Round spermatid
149	ENSMUSG00000037552	Plekhg2	chr7	-	A3SS	Round spermatid
150	ENSMUSG00000034928	Rnf44	chr13	-	A3SS	Round spermatid
151	ENSMUSG00000035021	Baz1a	chr12	-	A3SS	Round spermatid
152	ENSMUSG00000018661	Cog1	chr11	+	A3SS	Round spermatid
153	ENSMUSG00000024160	Spsb3	chr17	+	A3SS	Round spermatid
154	ENSMUSG00000027088	Phospho2	chr2	+	A3SS	Round spermatid
155	ENSMUSG00000062590	Armc9	chr1	+	A3SS	Round spermatid
156	ENSMUSG00000030465	Psd3	chr8	-	A3SS	Round spermatid
157	ENSMUSG00000032480	Dhx30	chr9	-	A3SS	Round spermatid
158	ENSMUSG00000029130	Rnf32	chr5	+	A3SS	Round spermatid
159	ENSMUSG00000043987	Cep164	chr9	-	A3SS	Round spermatid
160	ENSMUSG00000020594	Pum2	chr12	+	A3SS	Round spermatid
161	ENSMUSG00000027677	Ttc14	chr3	+	A3SS	Round spermatid
162	ENSMUSG00000031729	Ist1	chr8	-	A3SS	Round spermatid
163	ENSMUSG00000029209	Gnpda2	chr5	-	A3SS	Round spermatid
164	ENSMUSG00000030929	Eri2	chr7	-	A3SS	Round spermatid
165	ENSMUSG00000023994	Nfya	chr17	-	A3SS	Round spermatid
166	ENSMUSG00000031386	Hcfc1	chrX	-	A3SS	Round spermatid
167	ENSMUSG00000039542	Ncam1	chr9	-	A3SS	Round spermatid
168	ENSMUSG00000006720	Zfp184	chr13	+	A3SS	Round spermatid
169	ENSMUSG00000028347	Tmeff1	chr4	+	A3SS	Round spermatid
170	ENSMUSG00000074358	Ccdc61	chr7	-	A3SS	Round spermatid
171	ENSMUSG00000033096	Apmap	chr2	-	A3SS	Round spermatid
172	ENSMUSG00000031816	Mthfsd	chr8	-	A3SS	Round spermatid
173	ENSMUSG00000112117	RMST_1	chr10	-	A3SS	Round spermatid
174	ENSMUSG00000029003	Mad2l2	chr4	+	A3SS	Round spermatid
175	ENSMUSG00000041297	Cdk13	chr13	-	A3SS	Round spermatid
176	ENSMUSG00000032525	Nktr	chr9	+	A3SS	Round spermatid
177	ENSMUSG00000003617	Cp	chr3	+	A3SS	Round spermatid
178	ENSMUSG00000030598	Fbxo17	chr7	+	A3SS	Round spermatid
179	ENSMUSG00000031342	Gpm6b	chrX	+	A3SS	Round spermatid
180	ENSMUSG00000036860	Mrpl55	chr11	+	A3SS	Round spermatid
181	ENSMUSG00000036473	Tbc1d24	chr17	-	A3SS	Round spermatid
182	ENSMUSG00000028453	Fancg	chr4	-	A3SS	Round spermatid
183	ENSMUSG00000064043	Trerf1	chr17	+	A3SS	Round spermatid
184	ENSMUSG00000027620	Rbm39	chr2	-	A3SS	Round spermatid
185	ENSMUSG00000028943	Espn	chr4	-	A3SS	Round spermatid
186	ENSMUSG00000021906	Oxnad1	chr14	+	A3SS	Round spermatid
187	ENSMUSG00000025967	Eef1b2	chr1	+	A3SS	Round spermatid
188	ENSMUSG00000028060	2810403A07Rik	chr3	+	A3SS	Round spermatid
189	ENSMUSG00000038733	Wdr26	chr1	-	A3SS	Round spermatid
190	ENSMUSG00000029012	Orc5	chr5	-	A3SS	Round spermatid
191	ENSMUSG00000068115	Ninl	chr2	-	A3SS	Round spermatid
192	ENSMUSG00000064145	Arih2	chr9	-	A3SS	Round spermatid
193	ENSMUSG00000050312	Nsun3	chr16	-	A3SS	Round spermatid
194	ENSMUSG00000098090	2700099C18Rik	chr17	+	A3SS	Round spermatid
195	ENSMUSG00000038274	Fau	chr19	+	A3SS	Round spermatid
196	ENSMUSG00000018398	Sept8	chr11	+	A3SS	Round spermatid
197	ENSMUSG00000028360	Slc44a5	chr3	+	A3SS	Round spermatid
198	ENSMUSG00000028671	Gale	chr4	+	A3SS	Round spermatid
199	ENSMUSG00000034175	Rhbdd3	chr11	+	A3SS	Round spermatid
200	ENSMUSG00000039660	Spout1	chr2	-	A3SS	Round spermatid
201	ENSMUSG00000062906	Hdac10	chr15	-	A3SS	Round spermatid
202	ENSMUSG00000020472	Zkscan17	chr11	-	A3SS	Round spermatid
203	ENSMUSG00000015095	Fbxw5	chr2	+	A3SS	Round spermatid
204	ENSMUSG00000080316	Spaca6	chr17	+	A3SS	Round spermatid
205	ENSMUSG00000045503	Sys1	chr2	+	A3SS	Round spermatid
206	ENSMUSG00000061474	Mrps36	chr13	-	A3SS	Round spermatid
207	ENSMUSG00000035798	Zdhhc17	chr10	-	A3SS	Round spermatid
208	ENSMUSG00000019996	Map7	chr10	+	A3SS	Round spermatid
209	ENSMUSG00000036202	Rif1	chr2	+	A3SS	Round spermatid
210	ENSMUSG00000035545	Leng8	chr7	+	A3SS	Round spermatid
211	ENSMUSG00000049624	Slc17a5	chr9	-	A3SS	Round spermatid
212	ENSMUSG00000041341	Atg2b	chr12	-	A3SS	Round spermatid
213	ENSMUSG00000073468	Sft2d1	chr17	+	A3SS	Round spermatid
214	ENSMUSG00000018449	Rpain	chr11	+	A3SS	Round spermatid
215	ENSMUSG00000029625	Cpsf4	chr5	+	A3SS	Round spermatid
216	ENSMUSG00000022827	Rabl3	chr16	+	A3SS	Round spermatid
217	ENSMUSG00000028689	Ccdc163	chr4	+	A3SS	Round spermatid
218	ENSMUSG00000030330	Ing4	chr6	+	A3SS	Round spermatid
219	ENSMUSG00000057649	Brd9	chr13	+	A3SS	Round spermatid
220	ENSMUSG00000029510	Gpc2	chr5	-	A3SS	Round spermatid
221	ENSMUSG00000042709	Atpaf2	chr11	-	A3SS	Round spermatid
222	ENSMUSG00000029089	5730480H06Rik	chr5	+	A3SS	Round spermatid
223	ENSMUSG00000032280	Tle3	chr9	+	A3SS	Round spermatid
224	ENSMUSG00000043262	Uevld	chr7	-	A3SS	Round spermatid
225	ENSMUSG00000005804	Bloc1s6	chr2	+	A3SS	Round spermatid
226	ENSMUSG00000022324	Matn2	chr15	+	A3SS	Round spermatid
227	ENSMUSG00000034729	Mrps10	chr17	+	A3SS	Round spermatid
228	ENSMUSG00000004508	Gab2	chr7	+	A3SS	Round spermatid
229	ENSMUSG00000074247	Dda1	chr8	+	A3SS	Round spermatid
230	ENSMUSG00000020166	Cnot2	chr10	-	A3SS	Round spermatid
231	ENSMUSG00000028064	Sema4a	chr3	-	A3SS	Round spermatid
232	ENSMUSG00000005982	Naa60	chr16	+	A3SS	Round spermatid
233	ENSMUSG00000033439	Trmt13	chr3	-	A3SS	Round spermatid
234	ENSMUSG00000024963	Dnajc4	chr19	-	A3SS	Round spermatid
235	ENSMUSG00000029592	Usp30	chr5	+	A3SS	Round spermatid
236	ENSMUSG00000005417	Mprip	chr11	+	A3SS	Round spermatid
237	ENSMUSG00000052593	Adam17	chr12	-	A3SS	Round spermatid
238	ENSMUSG00000042508	Dmtf1	chr5	-	A3SS	Round spermatid
239	ENSMUSG00000028545	Bend5	chr4	+	A3SS	Round spermatid
240	ENSMUSG00000005687	Bcas2	chr3	+	A3SS	Round spermatid
241	ENSMUSG00000024805	Pcgf5	chr19	+	A3SS	Round spermatid
242	ENSMUSG00000030538	Cib1	chr7	-	A3SS	Round spermatid
243	ENSMUSG00000067629	Syngap1	chr17	+	A3SS	Round spermatid
244	ENSMUSG00000020212	Mdm1	chr10	+	A3SS	Round spermatid
245	ENSMUSG00000046169	Adamts6	chr13	+	A3SS	Round spermatid
246	ENSMUSG00000060862	Zbtb40	chr4	-	A3SS	Round spermatid
247	ENSMUSG00000044573	Acp1	chr12	-	A3SS	Round spermatid
248	ENSMUSG00000026335	Pam	chr1	-	A3SS	Round spermatid
249	ENSMUSG00000033596	Rfwd3	chr8	-	A3SS	Round spermatid
250	ENSMUSG00000022822	Abcc5	chr16	-	A3SS	Round spermatid
251	ENSMUSG00000017686	Rhot1	chr11	+	A3SS	Round spermatid
252	ENSMUSG00000033055	Ankrd54	chr15	-	A3SS	Round spermatid
253	ENSMUSG00000034563	Ccpg1	chr9	+	A3SS	Round spermatid
254	ENSMUSG00000034573	Ptpn13	chr5	+	A3SS	Round spermatid
255	ENSMUSG00000027365	Trpm7	chr2	-	A3SS	Round spermatid
256	ENSMUSG00000003873	Bax	chr7	-	A3SS	Round spermatid
257	ENSMUSG00000006215	Zbtb17	chr4	+	A3SS	Round spermatid
258	ENSMUSG00000028960	Ube4b	chr4	-	A3SS	Round spermatid
259	ENSMUSG00000005583	Mef2c	chr13	+	A3SS	Round spermatid
260	ENSMUSG00000017417	Plxdc1	chr11	-	A3SS	Round spermatid
261	ENSMUSG00000039458	Mtmr12	chr15	+	A3SS	Round spermatid
262	ENSMUSG00000026456	Cyb5r1	chr1	+	A3SS	Round spermatid
263	ENSMUSG00000027001	Dusp19	chr2	+	A3SS	Round spermatid
264	ENSMUSG00000049339	Retreg2	chr1	+	A3SS	Round spermatid
265	ENSMUSG00000061286	Exosc5	chr7	+	A3SS	Round spermatid
266	ENSMUSG00000059475	Zfp426	chr9	-	A3SS	Round spermatid
267	ENSMUSG00000041769	Ppp2r2d	chr7	+	A3SS	Round spermatid
268	ENSMUSG00000023007	Prpf40b	chr15	+	A3SS	Round spermatid
269	ENSMUSG00000035382	Pcsk7	chr9	+	A3SS	Round spermatid
270	ENSMUSG00000019856	Fam184a	chr10	-	A3SS	Round spermatid
271	ENSMUSG00000041164	Zmiz2	chr11	+	A3SS	Round spermatid
272	ENSMUSG00000047554	Tmem41b	chr7	-	A3SS	Round spermatid
273	ENSMUSG00000014850	Msh3	chr13	-	A3SS	Round spermatid
274	ENSMUSG00000025591	Tma16	chr8	-	A3SS	Round spermatid
275	ENSMUSG00000038895	Zfp653	chr9	-	A3SS	Round spermatid
276	ENSMUSG00000000134	Tfe3	chrX	+	A3SS	Round spermatid
277	ENSMUSG00000032299	Commd4	chr9	-	A3SS	Round spermatid
278	ENSMUSG00000026708	Cenpl	chr1	+	A3SS	Round spermatid
279	ENSMUSG00000030083	Abtb1	chr6	-	A3SS	Round spermatid
280	ENSMUSG00000025337	Sbds	chr5	-	A3SS	Round spermatid
281	ENSMUSG00000028639	Ybx1	chr4	-	A3SS	Round spermatid
282	ENSMUSG00000028034	Fubp1	chr3	+	A3SS	Round spermatid
283	ENSMUSG00000035203	Epn1	chr7	+	A3SS	Round spermatid
284	ENSMUSG00000034744	Nagk	chr6	+	A3SS	Round spermatid
285	ENSMUSG00000027615	Hps3	chr3	-	A3SS	Round spermatid
286	ENSMUSG00000004815	Dgkq	chr5	-	A3SS	Round spermatid
287	ENSMUSG00000051278	Zgrf1	chr3	+	A3SS	Round spermatid
288	ENSMUSG00000028134	Ptbp2	chr3	-	A3SS	Round spermatid
289	ENSMUSG00000000131	Xpo6	chr7	-	A3SS	Round spermatid
290	ENSMUSG00000001844	Zdhhc4	chr5	-	A3SS	Round spermatid
291	ENSMUSG00000030556	Lrrc28	chr7	-	A3SS	Round spermatid
292	ENSMUSG00000031851	Ntpcr	chr8	+	A3SS	Round spermatid
293	ENSMUSG00000003299	Mrpl4	chr9	+	A3SS	Round spermatid
294	ENSMUSG00000024483	Ankhd1	chr18	+	A3SS	Round spermatid
295	ENSMUSG00000025409	Mbd6	chr10	-	A3SS	Round spermatid
296	ENSMUSG00000031922	Cep57	chr9	-	A3SS	Round spermatid
297	ENSMUSG00000014668	Chfr	chr5	+	A3SS	Round spermatid
298	ENSMUSG00000036570	Fxyd1	chr7	-	A3SS	Round spermatid
299	ENSMUSG00000032058	Ppp2r1b	chr9	+	A3SS	Round spermatid
300	ENSMUSG00000023952	Gtpbp2	chr17	+	A3SS	Round spermatid
301	ENSMUSG00000005078	Jkamp	chr12	+	A3SS	Round spermatid
302	ENSMUSG00000039176	Polg	chr7	-	A3SS	Round spermatid
303	ENSMUSG00000023707	Ogfod2	chr5	+	A3SS	Round spermatid
304	ENSMUSG00000023904	Hcfc1r1	chr17	+	A3SS	Round spermatid
305	ENSMUSG00000002833	Hdgfl2	chr17	+	A3SS	Round spermatid
306	ENSMUSG00000034327	Kctd9	chr14	+	A3SS	Round spermatid
307	ENSMUSG00000003824	Syce2	chr8	+	A3SS	Round spermatid
308	ENSMUSG00000033111	3830406C13Rik	chr14	+	A3SS	Round spermatid
309	ENSMUSG00000014402	Tsg101	chr7	-	A3SS	Round spermatid
310	ENSMUSG00000061689	Dlgap4	chr2	+	A3SS	Round spermatid
311	ENSMUSG00000039242	B3galnt2	chr13	+	A3SS	Round spermatid
312	ENSMUSG00000060036	Rpl3	chr15	-	A3SS	Round spermatid
313	ENSMUSG00000025372	Baiap2	chr11	+	A3SS	Round spermatid
314	ENSMUSG00000033916	Chmp2a	chr7	-	A3SS	Round spermatid
315	ENSMUSG00000091803	Cox16	chr12	-	A3SS	Round spermatid
316	ENSMUSG00000014791	Elmo3	chr8	+	A3SS	Round spermatid
317	ENSMUSG00000043909	Trp53bp1	chr2	-	A3SS	Round spermatid
318	ENSMUSG00000039068	Zzz3	chr3	+	A3SS	Round spermatid
319	ENSMUSG00000052337	Immt	chr6	+	A3SS	Round spermatid
320	ENSMUSG00000030663	1110004F10Rik	chr7	+	A3SS	Round spermatid
321	ENSMUSG00000025085	Ablim1	chr19	-	A3SS	Round spermatid
322	ENSMUSG00000026455	Klhl12	chr1	+	A3SS	Round spermatid
323	ENSMUSG00000071533	Pcnp	chr16	-	A3SS	Round spermatid
324	ENSMUSG00000032582	Rbm6	chr9	-	A3SS	Round spermatid
325	ENSMUSG00000024283	Wac	chr18	+	A3SS	Round spermatid
326	ENSMUSG00000019948	Actr6	chr10	-	A3SS	Round spermatid
327	ENSMUSG00000041757	Plekha6	chr1	+	A3SS	Round spermatid
328	ENSMUSG00000018727	Cpsf4l	chr11	-	A3SS	Round spermatid
329	ENSMUSG00000028066	Pmf1	chr3	-	A3SS	Round spermatid
330	ENSMUSG00000032966	Fkbp1a	chr2	+	A3SS	Round spermatid
331	ENSMUSG00000029710	Ephb4	chr5	+	A3SS	Round spermatid
332	ENSMUSG00000039307	Hexdc	chr11	+	A3SS	Round spermatid
333	ENSMUSG00000020659	Cbll1	chr12	-	A3SS	Round spermatid
334	ENSMUSG00000023991	Foxp4	chr17	-	A3SS	Round spermatid
335	ENSMUSG00000055531	Cpsf6	chr10	-	A3SS	Round spermatid
336	ENSMUSG00000021112	Mpp5	chr12	+	A3SS	Round spermatid
337	ENSMUSG00000026790	Odf2	chr2	+	A3SS	Round spermatid
338	ENSMUSG00000030323	Ift122	chr6	+	A3SS	Round spermatid
339	ENSMUSG00000040225	Prrc2c	chr1	-	A3SS	Round spermatid
340	ENSMUSG00000060261	Gtf2i	chr5	-	A3SS	Round spermatid
341	ENSMUSG00000028952	Zbtb48	chr4	-	A3SS	Round spermatid
342	ENSMUSG00000056228	Cars2	chr8	-	A3SS	Round spermatid
343	ENSMUSG00000042185	Nfrkb	chr9	+	A3SS	Round spermatid
344	ENSMUSG00000038271	Iffo1	chr6	+	A3SS	Round spermatid
345	ENSMUSG00000025193	Cutc	chr19	+	A3SS	Round spermatid
346	ENSMUSG00000038365	Fbxo25	chr8	+	A3SS	Round spermatid
347	ENSMUSG00000036817	Sun1	chr5	+	A3SS	Round spermatid
348	ENSMUSG00000035597	Prpf39	chr12	+	A3SS	Round spermatid
349	ENSMUSG00000063450	Syne2	chr12	+	A3SS	Round spermatid
350	ENSMUSG00000017715	Pgs1	chr11	+	A3SS	Round spermatid
351	ENSMUSG00000001034	Mapk7	chr11	-	A3SS	Round spermatid
352	ENSMUSG00000037761	Actr5	chr2	+	A3SS	Round spermatid
353	ENSMUSG00000019590	Cyb561	chr11	-	A3SS	Round spermatid
354	ENSMUSG00000028854	Slc9a1	chr4	+	A3SS	Round spermatid
355	ENSMUSG00000042210	Abhd14a	chr9	-	A3SS	Round spermatid
356	ENSMUSG00000027478	Dnmt3b	chr2	+	A3SS	Round spermatid
357	ENSMUSG00000021134	Srsf5	chr12	+	A3SS	Round spermatid
358	ENSMUSG00000018501	Ncor1	chr11	-	A3SS	Round spermatid
359	ENSMUSG00000038780	Smurf1	chr5	-	A3SS	Round spermatid
360	ENSMUSG00000032316	Clk3	chr9	-	A3SS	Round spermatid
361	ENSMUSG00000062270	Morf4l1	chr9	-	A3SS	Round spermatid
362	ENSMUSG00000025316	Banp	chr8	+	A3SS	Round spermatid
363	ENSMUSG00000030177	Ccdc77	chr6	-	A3SS	Round spermatid
364	ENSMUSG00000032633	Flcn	chr11	-	A3SS	Round spermatid
365	ENSMUSG00000032621	Srek1	chr13	-	A3SS	Round spermatid
366	ENSMUSG00000041477	Dcp1b	chr6	+	A3SS	Round spermatid
367	ENSMUSG00000026766	Mmadhc	chr2	-	A3SS	Round spermatid
368	ENSMUSG00000020743	Mif4gd	chr11	-	A3SS	Round spermatid
369	ENSMUSG00000033276	Stk36	chr1	+	A3SS	Round spermatid
370	ENSMUSG00000012609	Ttll5	chr12	+	A3SS	Round spermatid
371	ENSMUSG00000036864	Proser3	chr7	-	A3SS	Round spermatid
372	ENSMUSG00000028944	Prkag2	chr5	-	A3SS	Round spermatid
373	ENSMUSG00000014444	Piezo1	chr8	-	A3SS	Round spermatid
374	ENSMUSG00000039936	Pik3cd	chr4	-	A3SS	Round spermatid
375	ENSMUSG00000055723	Rras2	chr7	-	A3SS	Round spermatid
376	ENSMUSG00000054387	Mdm4	chr1	-	A3SS	Round spermatid
377	ENSMUSG00000066037	Hnrnpr	chr4	+	A3SS	Round spermatid
378	ENSMUSG00000021546	Hnrnpk	chr13	-	A3SS	Round spermatid
379	ENSMUSG00000001416	Cct3	chr3	+	A3SS	Round spermatid
380	ENSMUSG00000029165	Agbl5	chr5	+	A3SS	Round spermatid
381	ENSMUSG00000068328	Aup1	chr6	+	A3SS	Round spermatid
382	ENSMUSG00000041870	Ankrd13a	chr5	+	A3SS	Round spermatid
383	ENSMUSG00000013787	Ehmt2	chr17	+	A3SS	Round spermatid
384	ENSMUSG00000058298	Mcm9	chr10	-	A3SS	Round spermatid
385	ENSMUSG00000026925	Inpp5e	chr2	-	A3SS	Round spermatid
386	ENSMUSG00000029022	Miip	chr4	-	A3SS	Round spermatid
387	ENSMUSG00000047248	C2cd3	chr7	+	A3SS	Round spermatid
388	ENSMUSG00000021218	Gdi2	chr13	+	A3SS	Round spermatid
389	ENSMUSG00000025142	Aspscr1	chr11	+	A3SS	Round spermatid
390	ENSMUSG00000016181	Diexf	chr1	-	A3SS	Round spermatid
391	ENSMUSG00000000759	Tubgcp3	chr8	-	A3SS	Round spermatid
392	ENSMUSG00000019302	Atp6v0a1	chr11	+	A3SS	Round spermatid
393	ENSMUSG00000020687	Cdc27	chr11	-	A3SS	Round spermatid
394	ENSMUSG00000029064	Gnb1	chr4	+	A3SS	Round spermatid
395	ENSMUSG00000006676	Usp19	chr9	+	A3SS	Round spermatid
396	ENSMUSG00000030759	Far1	chr7	+	A3SS	Round spermatid
397	ENSMUSG00000026219	Trip12	chr1	-	A3SS	Round spermatid
398	ENSMUSG00000021585	Cast	chr13	-	A3SS	Round spermatid
399	ENSMUSG00000023051	Tarbp2	chr15	+	A3SS	Round spermatid
400	ENSMUSG00000028681	Ptch2	chr4	+	A3SS	Round spermatid
401	ENSMUSG00000031065	Cdk16	chrX	+	A3SS	Round spermatid
402	ENSMUSG00000037190	Cyb561d2	chr9	-	A3SS	Round spermatid
403	ENSMUSG00000023015	Racgap1	chr15	-	A3SS	Round spermatid
404	ENSMUSG00000024422	Dhx16	chr17	+	A3SS	Round spermatid
405	ENSMUSG00000039048	Foxred1	chr9	-	A3SS	Round spermatid
406	ENSMUSG00000024044	Epb41l3	chr17	+	A3SS	Round spermatid
407	ENSMUSG00000055897	Ppp4r1l-ps	chr2	-	A3SS	Round spermatid
408	ENSMUSG00000063511	Snrnp70	chr7	-	A3SS	Round spermatid
409	ENSMUSG00000021175	Cdca7l	chr12	+	A3SS	Round spermatid
410	ENSMUSG00000001870	Ltbp1	chr17	+	A3SS	Round spermatid
411	ENSMUSG00000025665	Rps6ka6	chrX	-	A3SS	Round spermatid
412	ENSMUSG00000028708	Mknk1	chr4	+	A3SS	Round spermatid
413	ENSMUSG00000037174	Elf2	chr3	-	A3SS	Round spermatid
414	ENSMUSG00000026641	Usf1	chr1	+	A3SS	Round spermatid
415	ENSMUSG00000030590	Fam98c	chr7	-	A3SS	Round spermatid
416	ENSMUSG00000038095	Sbno1	chr5	-	A3SS	Round spermatid
417	ENSMUSG00000022562	Oplah	chr15	-	A3SS	Round spermatid
418	ENSMUSG00000026816	Gtf3c5	chr2	-	A3SS	Round spermatid
419	ENSMUSG00000036550	Cnot1	chr8	-	A3SS	Round spermatid
420	ENSMUSG00000030035	Wbp1	chr6	-	A3SS	Round spermatid
421	ENSMUSG00000043411	Usp48	chr4	+	A3SS	Round spermatid
422	ENSMUSG00000038712	Mindy1	chr3	+	A3SS	Round spermatid
423	ENSMUSG00000022999	Lmbr1l	chr15	-	A3SS	Round spermatid
424	ENSMUSG00000024201	Kdm4b	chr17	+	A3SS	Round spermatid
425	ENSMUSG00000022961	Son	chr16	+	A3SS	Round spermatid
426	ENSMUSG00000022973	Synj1	chr16	-	A3SS	Round spermatid
427	ENSMUSG00000001017	Chtop	chr3	-	A3SS	Round spermatid
428	ENSMUSG00000052456	Asna1	chr8	-	A3SS	Round spermatid
429	ENSMUSG00000022940	Pigp	chr16	-	A5SS	Round spermatid
430	ENSMUSG00000020196	Cabin1	chr10	-	A5SS	Round spermatid
431	ENSMUSG00000022617	Chkb	chr15	-	A5SS	Round spermatid
432	ENSMUSG00000019539	Rcn3	chr7	-	A5SS	Round spermatid
433	ENSMUSG00000020486	Sept4	chr11	+	A5SS	Round spermatid
434	ENSMUSG00000052812	Atad2b	chr12	+	A5SS	Round spermatid
435	ENSMUSG00000022884	Eif4a2	chr16	+	A5SS	Round spermatid
436	ENSMUSG00000054770	Kctd18	chr1	-	A5SS	Round spermatid
437	ENSMUSG00000032580	Rbm5	chr9	-	A5SS	Round spermatid
438	ENSMUSG00000036632	Alg5	chr3	+	A5SS	Round spermatid
439	ENSMUSG00000020882	Cacnb1	chr11	-	A5SS	Round spermatid
440	ENSMUSG00000028646	Rragc	chr4	+	A5SS	Round spermatid
441	ENSMUSG00000035310	Lin54	chr5	-	A5SS	Round spermatid
442	ENSMUSG00000041459	Tardbp	chr4	-	A5SS	Round spermatid
443	ENSMUSG00000040410	Fbxl4	chr4	+	A5SS	Round spermatid
444	ENSMUSG00000040174	Alkbh3	chr2	-	A5SS	Round spermatid
445	ENSMUSG00000068922	Msto1	chr3	-	A5SS	Round spermatid
446	ENSMUSG00000045795	Whamm	chr7	+	A5SS	Round spermatid
447	ENSMUSG00000090626	Tex9	chr9	-	A5SS	Round spermatid
448	ENSMUSG00000044465	Fam160a2	chr7	-	A5SS	Round spermatid
449	ENSMUSG00000021476	Habp4	chr13	+	A5SS	Round spermatid
450	ENSMUSG00000038429	Usp5	chr6	-	A5SS	Round spermatid
451	ENSMUSG00000026107	Nabp1	chr1	-	A5SS	Round spermatid
452	ENSMUSG00000024012	Mtch1	chr17	-	A5SS	Round spermatid
453	ENSMUSG00000049658	Bdp1	chr13	-	A5SS	Round spermatid
454	ENSMUSG00000048537	Phldb1	chr9	-	A5SS	Round spermatid
455	ENSMUSG00000030061	Uba3	chr6	-	A5SS	Round spermatid
456	ENSMUSG00000063810	Alms1	chr6	+	A5SS	Round spermatid
457	ENSMUSG00000055296	Tmem245	chr4	-	A5SS	Round spermatid
458	ENSMUSG00000062963	Ufc1	chr1	-	A5SS	Round spermatid
459	ENSMUSG00000004319	Clcn3	chr8	-	A5SS	Round spermatid
460	ENSMUSG00000036980	Taf6	chr5	-	A5SS	Round spermatid
461	ENSMUSG00000031939	Taf1d	chr9	+	A5SS	Round spermatid
462	ENSMUSG00000047036	Zfp445	chr9	-	A5SS	Round spermatid
463	ENSMUSG00000022770	Dlg1	chr16	+	A5SS	Round spermatid
464	ENSMUSG00000021282	Eif5	chr12	+	A5SS	Round spermatid
465	ENSMUSG00000062822	4833420G17Rik	chr13	+	A5SS	Round spermatid
466	ENSMUSG00000037935	Smarce1	chr11	-	A5SS	Round spermatid
467	ENSMUSG00000029464	Gpn3	chr5	+	A5SS	Round spermatid
468	ENSMUSG00000004040	Stat3	chr11	-	A5SS	Round spermatid
469	ENSMUSG00000026095	Asnsd1	chr1	-	A5SS	Round spermatid
470	ENSMUSG00000017264	Exosc10	chr4	+	A5SS	Round spermatid
471	ENSMUSG00000034303	Ccdc15	chr9	-	A5SS	Round spermatid
472	ENSMUSG00000037270	4932438A13Rik	chr3	+	A5SS	Round spermatid
473	ENSMUSG00000019951	Uhrf1bp1l	chr10	+	A5SS	Round spermatid
474	ENSMUSG00000003778	Brd8	chr18	-	A5SS	Round spermatid
475	ENSMUSG00000074165	Zfp788	chr7	+	A5SS	Round spermatid
476	ENSMUSG00000005682	Pan2	chr10	+	A5SS	Round spermatid
477	ENSMUSG00000037364	Srrt	chr5	-	A5SS	Round spermatid
478	ENSMUSG00000070420	Zscan25	chr5	+	A5SS	Round spermatid
479	ENSMUSG00000021066	Atl1	chr12	+	A5SS	Round spermatid
480	ENSMUSG00000027550	Lrrcc1	chr3	+	A5SS	Round spermatid
481	ENSMUSG00000010608	Rbm25	chr12	+	A5SS	Round spermatid
482	ENSMUSG00000012848	Rps5	chr7	+	A5SS	Round spermatid
483	ENSMUSG00000074129	Rpl13a	chr7	-	A5SS	Round spermatid
484	ENSMUSG00000108414	Snhg1	chr19	+	A5SS	Round spermatid
485	ENSMUSG00000031441	Atp11a	chr8	+	A5SS	Round spermatid
486	ENSMUSG00000026927	Sdccag3	chr2	-	A5SS	Round spermatid
487	ENSMUSG00000032185	Carm1	chr9	+	A5SS	Round spermatid
488	ENSMUSG00000098950	Gm28036	chr2	-	A5SS	Round spermatid
489	ENSMUSG00000011257	Pabpc4	chr4	+	A5SS	Round spermatid
490	ENSMUSG00000031156	Slc35a2	chrX	+	A5SS	Round spermatid
491	ENSMUSG00000029267	Mtf2	chr5	+	A5SS	Round spermatid
492	ENSMUSG00000030435	U2af2	chr7	+	A5SS	Round spermatid
493	ENSMUSG00000027469	Tpx2	chr2	+	A5SS	Round spermatid
494	ENSMUSG00000003923	Tfam	chr10	-	A5SS	Round spermatid
495	ENSMUSG00000027411	Vps16	chr2	+	A5SS	Round spermatid
496	ENSMUSG00000026577	Blzf1	chr1	-	A5SS	Round spermatid
497	ENSMUSG00000021819	Zswim8	chr14	+	A5SS	Round spermatid
498	ENSMUSG00000089736	Tgfbr3l	chr8	+	A5SS	Round spermatid
499	ENSMUSG00000038943	Prc1	chr7	+	A5SS	Round spermatid
500	ENSMUSG00000039652	Cpeb3	chr19	-	A5SS	Round spermatid
501	ENSMUSG00000028394	Pole3	chr4	-	A5SS	Round spermatid
502	ENSMUSG00000018196	Glrx2	chr1	+	A5SS	Round spermatid
503	ENSMUSG00000020184	Mdm2	chr10	-	A5SS	Round spermatid
504	ENSMUSG00000025420	Katnal2	chr18	-	A5SS	Round spermatid
505	ENSMUSG00000053453	Thoc7	chr14	-	A5SS	Round spermatid
506	ENSMUSG00000015090	Ptgds	chr2	-	A5SS	Round spermatid
507	ENSMUSG00000062198	2700097O09Rik	chr12	-	A5SS	Round spermatid
508	ENSMUSG00000000902	Smarcb1	chr10	-	A5SS	Round spermatid
509	ENSMUSG00000029060	Mib2	chr4	-	A5SS	Round spermatid
510	ENSMUSG00000025237	Parp6	chr9	+	A5SS	Round spermatid
511	ENSMUSG00000020451	Limk2	chr11	-	A5SS	Round spermatid
512	ENSMUSG00000029478	Ncor2	chr5	-	A5SS	Round spermatid
513	ENSMUSG00000026798	Coq4	chr2	+	A5SS	Round spermatid
514	ENSMUSG00000037363	Letm2	chr8	-	A5SS	Round spermatid
515	ENSMUSG00000030180	Kdm5a	chr6	+	A5SS	Round spermatid
516	ENSMUSG00000067367	Lyar	chr5	+	A5SS	Round spermatid
517	ENSMUSG00000026634	Angel2	chr1	+	A5SS	Round spermatid
518	ENSMUSG00000021235	Coq6	chr12	+	A5SS	Round spermatid
519	ENSMUSG00000001909	Trmt1	chr8	+	A5SS	Round spermatid
520	ENSMUSG00000028552	Eps15	chr4	+	A5SS	Round spermatid
521	ENSMUSG00000073795	6430531B16Rik	chr7	-	A5SS	Round spermatid
522	ENSMUSG00000026977	March7	chr2	+	A5SS	Round spermatid
523	ENSMUSG00000038346	Zfp384	chr6	+	A5SS	Round spermatid
524	ENSMUSG00000021893	Capn7	chr14	+	A5SS	Round spermatid
525	ENSMUSG00000063047	Zfp780b	chr7	-	A5SS	Round spermatid
526	ENSMUSG00000030346	Rad51ap1	chr6	-	A5SS	Round spermatid
527	ENSMUSG00000032567	Aste1	chr9	+	A5SS	Round spermatid
528	ENSMUSG00000023467	Tulp2	chr7	+	A5SS	Round spermatid
529	ENSMUSG00000061136	Prpf40a	chr2	-	A5SS	Round spermatid
530	ENSMUSG00000030269	Mtmr14	chr6	+	A5SS	Round spermatid
531	ENSMUSG00000005774	Rfx5	chr3	+	A5SS	Round spermatid
532	ENSMUSG00000025958	Creb1	chr1	+	A5SS	Round spermatid
533	ENSMUSG00000060147	Serpinb6a	chr13	-	A5SS	Round spermatid
534	ENSMUSG00000023764	Sfi1	chr11	-	A5SS	Round spermatid
535	ENSMUSG00000026113	Inpp4a	chr1	+	A5SS	Round spermatid
536	ENSMUSG00000020530	Ggnbp2	chr11	-	A5SS	Round spermatid
537	ENSMUSG00000026349	Ccnt2	chr1	+	A5SS	Round spermatid
538	ENSMUSG00000019710	Mrpl24	chr3	+	A5SS	Round spermatid
539	ENSMUSG00000036223	Ska1	chr18	-	A5SS	Round spermatid
540	ENSMUSG00000032480	Dhx30	chr9	-	A5SS	Round spermatid
541	ENSMUSG00000031812	Map1lc3b	chr8	+	A5SS	Round spermatid
542	ENSMUSG00000049659	Aftph	chr11	-	A5SS	Round spermatid
543	ENSMUSG00000006304	Arpc2	chr1	+	A5SS	Round spermatid
544	ENSMUSG00000070953	Rabepk	chr2	-	A5SS	Round spermatid
545	ENSMUSG00000020594	Pum2	chr12	+	A5SS	Round spermatid
546	ENSMUSG00000042772	Smg7	chr1	-	A5SS	Round spermatid
547	ENSMUSG00000024430	Cabyr	chr18	+	A5SS	Round spermatid
548	ENSMUSG00000026409	Pfkfb2	chr1	-	A5SS	Round spermatid
549	ENSMUSG00000027284	Cdan1	chr2	-	A5SS	Round spermatid
550	ENSMUSG00000042726	Trafd1	chr5	-	A5SS	Round spermatid
551	ENSMUSG00000025980	Hspd1	chr1	-	A5SS	Round spermatid
552	ENSMUSG00000035851	Ythdc1	chr5	+	A5SS	Round spermatid
553	ENSMUSG00000006589	Aprt	chr8	-	A5SS	Round spermatid
554	ENSMUSG00000059689	Zfp637	chr6	+	A5SS	Round spermatid
555	ENSMUSG00000038900	Rpl12	chr2	+	A5SS	Round spermatid
556	ENSMUSG00000006720	Zfp184	chr13	+	A5SS	Round spermatid
557	ENSMUSG00000013858	Tmem259	chr10	-	A5SS	Round spermatid
558	ENSMUSG00000078485	Plekhn1	chr4	-	A5SS	Round spermatid
559	ENSMUSG00000024163	Mapk8ip3	chr17	-	A5SS	Round spermatid
560	ENSMUSG00000060073	Psma3	chr12	+	A5SS	Round spermatid
561	ENSMUSG00000071226	Cecr2	chr6	+	A5SS	Round spermatid
562	ENSMUSG00000022394	L3mbtl2	chr15	+	A5SS	Round spermatid
563	ENSMUSG00000032525	Nktr	chr9	+	A5SS	Round spermatid
564	ENSMUSG00000033799	Fam208b	chr13	-	A5SS	Round spermatid
565	ENSMUSG00000010110	Stx5a	chr19	+	A5SS	Round spermatid
566	ENSMUSG00000033416	Gucd1	chr10	-	A5SS	Round spermatid
567	ENSMUSG00000028453	Fancg	chr4	-	A5SS	Round spermatid
568	ENSMUSG00000058594	Fbxo18	chr2	-	A5SS	Round spermatid
569	ENSMUSG00000037902	Sirpa	chr2	+	A5SS	Round spermatid
570	ENSMUSG00000061411	Nol4l	chr2	-	A5SS	Round spermatid
571	ENSMUSG00000020260	Pofut2	chr10	+	A5SS	Round spermatid
572	ENSMUSG00000028218	Fam92a	chr4	-	A5SS	Round spermatid
573	ENSMUSG00000029062	Cdk11b	chr4	+	A5SS	Round spermatid
574	ENSMUSG00000028797	Tmem234	chr4	+	A5SS	Round spermatid
575	ENSMUSG00000019518	Ap4m1	chr5	+	A5SS	Round spermatid
576	ENSMUSG00000030980	Knop1	chr7	-	A5SS	Round spermatid
577	ENSMUSG00000025236	Adpgk	chr9	+	A5SS	Round spermatid
578	ENSMUSG00000048100	Taf13	chr3	+	A5SS	Round spermatid
579	ENSMUSG00000030409	Dmpk	chr7	+	A5SS	Round spermatid
580	ENSMUSG00000028295	Smim8	chr4	-	A5SS	Round spermatid
581	ENSMUSG00000045466	Zfp956	chr6	+	A5SS	Round spermatid
582	ENSMUSG00000022702	Hira	chr16	+	A5SS	Round spermatid
583	ENSMUSG00000005150	Wdr83	chr8	-	A5SS	Round spermatid
584	ENSMUSG00000034175	Rhbdd3	chr11	+	A5SS	Round spermatid
585	ENSMUSG00000020472	Zkscan17	chr11	-	A5SS	Round spermatid
586	ENSMUSG00000053332	Gas5	chr1	+	A5SS	Round spermatid
587	ENSMUSG00000037017	Zscan21	chr5	+	A5SS	Round spermatid
588	ENSMUSG00000020538	Srebf1	chr11	-	A5SS	Round spermatid
589	ENSMUSG00000045031	Cetn4	chr3	-	A5SS	Round spermatid
590	ENSMUSG00000051811	Cox6b2	chr7	-	A5SS	Round spermatid
591	ENSMUSG00000029020	Mfn2	chr4	-	A5SS	Round spermatid
592	ENSMUSG00000022788	Fgd4	chr16	-	A5SS	Round spermatid
593	ENSMUSG00000061288	Taok3	chr5	+	A5SS	Round spermatid
594	ENSMUSG00000003402	Prkcsh	chr9	+	A5SS	Round spermatid
595	ENSMUSG00000020290	Xpo1	chr11	+	A5SS	Round spermatid
596	ENSMUSG00000039205	Ciz1	chr2	+	A5SS	Round spermatid
597	ENSMUSG00000057335	Cep170	chr1	-	A5SS	Round spermatid
598	ENSMUSG00000073468	Sft2d1	chr17	+	A5SS	Round spermatid
599	ENSMUSG00000014418	Hps5	chr7	-	A5SS	Round spermatid
600	ENSMUSG00000005262	Ufd1	chr16	+	A5SS	Round spermatid
601	ENSMUSG00000031818	Cox4i1	chr8	+	A5SS	Round spermatid
602	ENSMUSG00000030330	Ing4	chr6	+	A5SS	Round spermatid
603	ENSMUSG00000030213	Atf7ip	chr6	+	A5SS	Round spermatid
604	ENSMUSG00000032280	Tle3	chr9	+	A5SS	Round spermatid
605	ENSMUSG00000051786	Tubgcp6	chr15	-	A5SS	Round spermatid
606	ENSMUSG00000005763	Cd247	chr1	+	A5SS	Round spermatid
607	ENSMUSG00000040782	Rfwd2	chr1	+	A5SS	Round spermatid
608	ENSMUSG00000034729	Mrps10	chr17	+	A5SS	Round spermatid
609	ENSMUSG00000074247	Dda1	chr8	+	A5SS	Round spermatid
610	ENSMUSG00000015749	Anp32e	chr3	+	A5SS	Round spermatid
611	ENSMUSG00000021668	Polk	chr13	-	A5SS	Round spermatid
612	ENSMUSG00000005417	Mprip	chr11	+	A5SS	Round spermatid
613	ENSMUSG00000017307	Acot8	chr2	-	A5SS	Round spermatid
614	ENSMUSG00000053565	Eif3k	chr7	-	A5SS	Round spermatid
615	ENSMUSG00000023286	Ube2j2	chr4	+	A5SS	Round spermatid
616	ENSMUSG00000035173	Ccdc186	chr19	-	A5SS	Round spermatid
617	ENSMUSG00000047909	Ankrd16	chr2	+	A5SS	Round spermatid
618	ENSMUSG00000044573	Acp1	chr12	-	A5SS	Round spermatid
619	ENSMUSG00000010277	2610507B11Rik	chr11	+	A5SS	Round spermatid
620	ENSMUSG00000056962	Jmjd6	chr11	-	A5SS	Round spermatid
621	ENSMUSG00000037326	Capn15	chr17	-	A5SS	Round spermatid
622	ENSMUSG00000044906	4930503L19Rik	chr18	-	A5SS	Round spermatid
623	ENSMUSG00000037103	Dcaf15	chr8	-	A5SS	Round spermatid
624	ENSMUSG00000021948	Prkcd	chr14	-	A5SS	Round spermatid
625	ENSMUSG00000002028	Kmt2a	chr9	-	A5SS	Round spermatid
626	ENSMUSG00000036902	Neto2	chr8	-	A5SS	Round spermatid
627	ENSMUSG00000003808	Farsa	chr8	+	A5SS	Round spermatid
628	ENSMUSG00000059439	Bcas3	chr11	+	A5SS	Round spermatid
629	ENSMUSG00000039458	Mtmr12	chr15	+	A5SS	Round spermatid
630	ENSMUSG00000021115	Vrk1	chr12	+	A5SS	Round spermatid
631	ENSMUSG00000059540	Tcea2	chr2	+	A5SS	Round spermatid
632	ENSMUSG00000059475	Zfp426	chr9	-	A5SS	Round spermatid
633	ENSMUSG00000040687	Madd	chr2	-	A5SS	Round spermatid
634	ENSMUSG00000027333	Smox	chr2	+	A5SS	Round spermatid
635	ENSMUSG00000023007	Prpf40b	chr15	+	A5SS	Round spermatid
636	ENSMUSG00000097589	Dleu2	chr14	-	A5SS	Round spermatid
637	ENSMUSG00000007880	Arid1a	chr4	-	A5SS	Round spermatid
638	ENSMUSG00000001143	Lman2l	chr1	-	A5SS	Round spermatid
639	ENSMUSG00000040928	S100pbp	chr4	-	A5SS	Round spermatid
640	ENSMUSG00000054823	Nsd3	chr8	+	A5SS	Round spermatid
641	ENSMUSG00000042520	Ubap2l	chr3	-	A5SS	Round spermatid
642	ENSMUSG00000027944	Hax1	chr3	-	A5SS	Round spermatid
643	ENSMUSG00000030815	Phkg2	chr7	+	A5SS	Round spermatid
644	ENSMUSG00000109378	U2af1l4	chr7	+	A5SS	Round spermatid
645	ENSMUSG00000022948	Setd4	chr16	-	A5SS	Round spermatid
646	ENSMUSG00000002221	Paxip1	chr5	-	A5SS	Round spermatid
647	ENSMUSG00000040746	Rnf167	chr11	+	A5SS	Round spermatid
648	ENSMUSG00000036459	Wtip	chr7	-	A5SS	Round spermatid
649	ENSMUSG00000033543	Gtf2a2	chr9	+	A5SS	Round spermatid
650	ENSMUSG00000011658	Fuz	chr7	+	A5SS	Round spermatid
651	ENSMUSG00000049550	Clip1	chr5	-	A5SS	Round spermatid
652	ENSMUSG00000068874	Selenbp1	chr3	+	A5SS	Round spermatid
653	ENSMUSG00000000131	Xpo6	chr7	-	A5SS	Round spermatid
654	ENSMUSG00000038013	Wipf2	chr11	+	A5SS	Round spermatid
655	ENSMUSG00000031556	Tm2d2	chr8	+	A5SS	Round spermatid
656	ENSMUSG00000004568	Arhgef18	chr8	+	A5SS	Round spermatid
657	ENSMUSG00000048264	Dip2c	chr13	+	A5SS	Round spermatid
658	ENSMUSG00000044783	Hjurp	chr1	-	A5SS	Round spermatid
659	ENSMUSG00000041594	Tmtc4	chr14	-	A5SS	Round spermatid
660	ENSMUSG00000039087	Rreb1	chr13	+	A5SS	Round spermatid
661	ENSMUSG00000028047	Thbs3	chr3	+	A5SS	Round spermatid
662	ENSMUSG00000022558	Mroh1	chr15	+	A5SS	Round spermatid
663	ENSMUSG00000066892	Fbxl12	chr9	-	A5SS	Round spermatid
664	ENSMUSG00000014767	Tbp	chr17	+	A5SS	Round spermatid
665	ENSMUSG00000021962	Dcp1a	chr14	+	A5SS	Round spermatid
666	ENSMUSG00000021139	Gm20498	chr12	-	A5SS	Round spermatid
667	ENSMUSG00000041328	Pcf11	chr7	-	A5SS	Round spermatid
668	ENSMUSG00000030557	Mef2a	chr7	-	A5SS	Round spermatid
669	ENSMUSG00000029687	Ezh2	chr6	-	A5SS	Round spermatid
670	ENSMUSG00000023235	Ccl25	chr8	+	A5SS	Round spermatid
671	ENSMUSG00000020572	Nampt	chr12	+	A5SS	Round spermatid
672	ENSMUSG00000040701	Ap1g2	chr14	-	A5SS	Round spermatid
673	ENSMUSG00000026439	Rbbp5	chr1	+	A5SS	Round spermatid
674	ENSMUSG00000075703	Selenoi	chr5	+	A5SS	Round spermatid
675	ENSMUSG00000004661	Arid3b	chr9	-	A5SS	Round spermatid
676	ENSMUSG00000041763	Tpp2	chr1	+	A5SS	Round spermatid
677	ENSMUSG00000002797	Ggct	chr6	-	A5SS	Round spermatid
678	ENSMUSG00000020069	Hnrnph3	chr10	-	A5SS	Round spermatid
679	ENSMUSG00000006289	Osgep	chr14	-	A5SS	Round spermatid
680	ENSMUSG00000052752	Traf7	chr17	-	A5SS	Round spermatid
681	ENSMUSG00000030104	Edem1	chr6	+	A5SS	Round spermatid
682	ENSMUSG00000024073	Birc6	chr17	+	A5SS	Round spermatid
683	ENSMUSG00000007411	Mark3	chr12	+	A5SS	Round spermatid
684	ENSMUSG00000021714	Cenpk	chr13	+	A5SS	Round spermatid
685	ENSMUSG00000040690	Col16a1	chr4	+	A5SS	Round spermatid
686	ENSMUSG00000024943	Smc5	chr19	-	A5SS	Round spermatid
687	ENSMUSG00000046230	Vps13a	chr19	-	A5SS	Round spermatid
688	ENSMUSG00000020659	Cbll1	chr12	-	A5SS	Round spermatid
689	ENSMUSG00000039354	Smarcal1	chr1	+	A5SS	Round spermatid
690	ENSMUSG00000026790	Odf2	chr2	+	A5SS	Round spermatid
691	ENSMUSG00000028677	Rnf220	chr4	-	A5SS	Round spermatid
692	ENSMUSG00000027405	Nop56	chr2	+	A5SS	Round spermatid
693	ENSMUSG00000039463	Slc9a8	chr2	+	A5SS	Round spermatid
694	ENSMUSG00000037475	Thoc2	chrX	-	A5SS	Round spermatid
695	ENSMUSG00000028107	Tars2	chr3	-	A5SS	Round spermatid
696	ENSMUSG00000026987	Baz2b	chr2	-	A5SS	Round spermatid
697	ENSMUSG00000036402	Gng12	chr6	+	A5SS	Round spermatid
698	ENSMUSG00000070424	Art5	chr7	-	A5SS	Round spermatid
699	ENSMUSG00000022843	Clcn2	chr16	-	A5SS	Round spermatid
700	ENSMUSG00000041846	Ppp4r3a	chr12	-	A5SS	Round spermatid
701	ENSMUSG00000022377	Asap1	chr15	-	A5SS	Round spermatid
702	ENSMUSG00000027829	Ccnl1	chr3	-	A5SS	Round spermatid
703	ENSMUSG00000018501	Ncor1	chr11	-	A5SS	Round spermatid
704	ENSMUSG00000032316	Clk3	chr9	-	A5SS	Round spermatid
705	ENSMUSG00000020514	Mrpl22	chr11	+	A5SS	Round spermatid
706	ENSMUSG00000032641	Gpr19	chr6	-	A5SS	Round spermatid
707	ENSMUSG00000038828	Tmem214	chr5	+	A5SS	Round spermatid
708	ENSMUSG00000034211	Mrps17	chr5	+	A5SS	Round spermatid
709	ENSMUSG00000012609	Ttll5	chr12	+	A5SS	Round spermatid
710	ENSMUSG00000031167	Rbm3	chrX	-	A5SS	Round spermatid
711	ENSMUSG00000034248	Slc25a37	chr14	-	A5SS	Round spermatid
712	ENSMUSG00000033918	Parl	chr16	-	A5SS	Round spermatid
713	ENSMUSG00000006335	Tfpt	chr7	-	A5SS	Round spermatid
714	ENSMUSG00000040813	Tex264	chr9	-	A5SS	Round spermatid
715	ENSMUSG00000020818	Mfsd11	chr11	+	A5SS	Round spermatid
716	ENSMUSG00000027881	Prpf38b	chr3	-	A5SS	Round spermatid
717	ENSMUSG00000007050	Lsm2	chr17	+	A5SS	Round spermatid
718	ENSMUSG00000043510	Hscb	chr5	-	A5SS	Round spermatid
719	ENSMUSG00000073433	Arhgdig	chr17	-	A5SS	Round spermatid
720	ENSMUSG00000066456	Hmgn3	chr9	-	A5SS	Round spermatid
721	ENSMUSG00000000916	Nsun5	chr5	+	A5SS	Round spermatid
722	ENSMUSG00000031381	Piga	chrX	+	A5SS	Round spermatid
723	ENSMUSG00000058298	Mcm9	chr10	-	A5SS	Round spermatid
724	ENSMUSG00000001289	Pfdn5	chr15	+	A5SS	Round spermatid
725	ENSMUSG00000001248	Gramd1a	chr7	-	A5SS	Round spermatid
726	ENSMUSG00000049482	Ctu2	chr8	+	A5SS	Round spermatid
727	ENSMUSG00000026867	Gapvd1	chr2	-	A5SS	Round spermatid
728	ENSMUSG00000036411	9530077C05Rik	chr9	+	A5SS	Round spermatid
729	ENSMUSG00000022864	D16Ertd472e	chr16	-	A5SS	Round spermatid
730	ENSMUSG00000026883	Dab2ip	chr2	+	A5SS	Round spermatid
731	ENSMUSG00000069631	Strada	chr11	-	A5SS	Round spermatid
732	ENSMUSG00000031885	Cbfb	chr8	+	A5SS	Round spermatid
733	ENSMUSG00000030759	Far1	chr7	+	A5SS	Round spermatid
734	ENSMUSG00000031570	Plpp5	chr8	+	A5SS	Round spermatid
735	ENSMUSG00000005893	Nr2c2	chr6	+	A5SS	Round spermatid
736	ENSMUSG00000021262	Evl	chr12	+	A5SS	Round spermatid
737	ENSMUSG00000021767	Kat6b	chr14	+	A5SS	Round spermatid
738	ENSMUSG00000036054	Sugp2	chr8	+	A5SS	Round spermatid
739	ENSMUSG00000029454	Mapkapk5	chr5	-	A5SS	Round spermatid
740	ENSMUSG00000027660	Skil	chr3	+	A5SS	Round spermatid
741	ENSMUSG00000032745	Gpbp1	chr13	-	A5SS	Round spermatid
742	ENSMUSG00000009995	Taz	chrX	+	A5SS	Round spermatid
743	ENSMUSG00000029502	Golga3	chr5	+	A5SS	Round spermatid
744	ENSMUSG00000029826	Zc3hav1	chr6	-	A5SS	Round spermatid
745	ENSMUSG00000015087	Rabl6	chr2	-	A5SS	Round spermatid
746	ENSMUSG00000030322	Mbd4	chr6	-	A5SS	Round spermatid
747	ENSMUSG00000062929	Cfl2	chr12	-	A5SS	Round spermatid
748	ENSMUSG00000047731	Wbp1l	chr19	+	A5SS	Round spermatid
749	ENSMUSG00000025915	Sgk3	chr1	+	A5SS	Round spermatid
750	ENSMUSG00000041528	Rnf123	chr9	-	A5SS	Round spermatid
751	ENSMUSG00000029578	Wipi2	chr5	+	A5SS	Round spermatid
752	ENSMUSG00000026399	Cd55	chr1	-	A5SS	Round spermatid
753	ENSMUSG00000022961	Son	chr16	+	A5SS	Round spermatid
754	ENSMUSG00000029098	Acox3	chr5	+	A5SS	Round spermatid
755	ENSMUSG00000057894	Zfp329	chr7	-	A5SS	Round spermatid
756	ENSMUSG00000019936	Epyc	chr10	+	MXE	Round spermatid
757	ENSMUSG00000021629	Slc30a5	chr13	-	MXE	Round spermatid
758	ENSMUSG00000018697	Aatf	chr11	-	MXE	Round spermatid
759	ENSMUSG00000028464	Tpm2	chr4	-	MXE	Round spermatid
760	ENSMUSG00000036879	Phkb	chr8	+	MXE	Round spermatid
761	ENSMUSG00000038914	Dido1	chr2	-	MXE	Round spermatid
762	ENSMUSG00000041890	Git2	chr5	-	MXE	Round spermatid
763	ENSMUSG00000002835	Chaf1a	chr17	+	MXE	Round spermatid
764	ENSMUSG00000030562	Nox4	chr7	+	MXE	Round spermatid
765	ENSMUSG00000063145	Bbs5	chr2	+	MXE	Round spermatid
766	ENSMUSG00000020882	Cacnb1	chr11	-	MXE	Round spermatid
767	ENSMUSG00000043940	Wdfy3	chr5	-	MXE	Round spermatid
768	ENSMUSG00000026782	Abi2	chr1	+	MXE	Round spermatid
769	ENSMUSG00000032366	Tpm1	chr9	-	MXE	Round spermatid
770	ENSMUSG00000061477	Rps7	chr12	-	MXE	Round spermatid
771	ENSMUSG00000032409	Atr	chr9	+	MXE	Round spermatid
772	ENSMUSG00000022515	Anks3	chr16	-	MXE	Round spermatid
773	ENSMUSG00000029922	Mkrn1	chr6	-	MXE	Round spermatid
774	ENSMUSG00000029505	Ep400	chr5	-	MXE	Round spermatid
775	ENSMUSG00000052707	Tnrc6a	chr7	+	MXE	Round spermatid
776	ENSMUSG00000020459	Mtif2	chr11	+	MXE	Round spermatid
777	ENSMUSG00000030374	Strn4	chr7	+	MXE	Round spermatid
778	ENSMUSG00000020100	Slc29a3	chr10	-	MXE	Round spermatid
779	ENSMUSG00000039703	Nploc4	chr11	-	MXE	Round spermatid
780	ENSMUSG00000041540	Sox5	chr6	-	MXE	Round spermatid
781	ENSMUSG00000034973	Dopey1	chr9	+	MXE	Round spermatid
782	ENSMUSG00000020253	Ppm1m	chr9	-	MXE	Round spermatid
783	ENSMUSG00000024082	Ndufaf7	chr17	+	MXE	Round spermatid
784	ENSMUSG00000021892	Sh3bp5	chr14	-	MXE	Round spermatid
785	ENSMUSG00000090626	Tex9	chr9	-	MXE	Round spermatid
786	ENSMUSG00000037605	Adgrl3	chr5	+	MXE	Round spermatid
787	ENSMUSG00000022032	Scara5	chr14	+	MXE	Round spermatid
788	ENSMUSG00000024921	Smarca2	chr19	+	MXE	Round spermatid
789	ENSMUSG00000025825	Iscu	chr5	+	MXE	Round spermatid
790	ENSMUSG00000028277	Ube2j1	chr4	+	MXE	Round spermatid
791	ENSMUSG00000019916	P4ha1	chr10	+	MXE	Round spermatid
792	ENSMUSG00000001089	Luzp1	chr4	+	MXE	Round spermatid
793	ENSMUSG00000029769	Ccdc136	chr6	+	MXE	Round spermatid
794	ENSMUSG00000030067	Foxp1	chr6	-	MXE	Round spermatid
795	ENSMUSG00000063889	Crem	chr18	-	MXE	Round spermatid
796	ENSMUSG00000020716	Nf1	chr11	+	MXE	Round spermatid
797	ENSMUSG00000060450	Rnf14	chr18	+	MXE	Round spermatid
798	ENSMUSG00000022812	Gsk3b	chr16	+	MXE	Round spermatid
799	ENSMUSG00000020755	Sap30bp	chr11	+	MXE	Round spermatid
800	ENSMUSG00000001415	Smg5	chr3	+	MXE	Round spermatid
801	ENSMUSG00000030007	Cct7	chr6	+	MXE	Round spermatid
802	ENSMUSG00000071064	Zfp827	chr8	+	MXE	Round spermatid
803	ENSMUSG00000041921	Metap1d	chr2	+	MXE	Round spermatid
804	ENSMUSG00000002963	Pnkp	chr7	+	MXE	Round spermatid
805	ENSMUSG00000020366	Mapk9	chr11	+	MXE	Round spermatid
806	ENSMUSG00000021144	Mta1	chr12	+	MXE	Round spermatid
807	ENSMUSG00000000708	Kat2b	chr17	+	MXE	Round spermatid
808	ENSMUSG00000024908	Ppp6r3	chr19	-	MXE	Round spermatid
809	ENSMUSG00000061887	Ssbp3	chr4	+	MXE	Round spermatid
810	ENSMUSG00000025871	4833439L19Rik	chr13	-	MXE	Round spermatid
811	ENSMUSG00000021196	Pfkp	chr13	-	MXE	Round spermatid
812	ENSMUSG00000001054	Rmnd5b	chr11	-	MXE	Round spermatid
813	ENSMUSG00000025487	Psmd13	chr7	+	MXE	Round spermatid
814	ENSMUSG00000027306	Nusap1	chr2	+	MXE	Round spermatid
815	ENSMUSG00000035126	Wdr78	chr4	-	MXE	Round spermatid
816	ENSMUSG00000015937	H2afy	chr13	-	MXE	Round spermatid
817	ENSMUSG00000030061	Uba3	chr6	-	MXE	Round spermatid
818	ENSMUSG00000063810	Alms1	chr6	+	MXE	Round spermatid
819	ENSMUSG00000032534	Cep63	chr9	-	MXE	Round spermatid
820	ENSMUSG00000026134	Prim2	chr1	-	MXE	Round spermatid
821	ENSMUSG00000040473	Cfap69	chr5	-	MXE	Round spermatid
822	ENSMUSG00000012123	Crybg2	chr4	+	MXE	Round spermatid
823	ENSMUSG00000021140	Pcnx	chr12	+	MXE	Round spermatid
824	ENSMUSG00000035297	Cops4	chr5	+	MXE	Round spermatid
825	ENSMUSG00000037960	Card19	chr13	-	MXE	Round spermatid
826	ENSMUSG00000032855	Pkd1	chr17	+	MXE	Round spermatid
827	ENSMUSG00000052221	Ppp1r36	chr12	+	MXE	Round spermatid
828	ENSMUSG00000005656	Snx6	chr12	-	MXE	Round spermatid
829	ENSMUSG00000013662	Atad1	chr19	-	MXE	Round spermatid
830	ENSMUSG00000040760	Appl1	chr14	-	MXE	Round spermatid
831	ENSMUSG00000038290	Smg6	chr11	+	MXE	Round spermatid
832	ENSMUSG00000040356	Skiv2l	chr17	-	MXE	Round spermatid
833	ENSMUSG00000020462	Cfap36	chr11	-	MXE	Round spermatid
834	ENSMUSG00000059119	Nap1l4	chr7	-	MXE	Round spermatid
835	ENSMUSG00000042167	Papd4	chr13	-	MXE	Round spermatid
836	ENSMUSG00000030990	Pgap2	chr7	+	MXE	Round spermatid
837	ENSMUSG00000030424	Zfp939	chr7	+	MXE	Round spermatid
838	ENSMUSG00000013878	Rnf170	chr8	+	MXE	Round spermatid
839	ENSMUSG00000039382	Wdr45	chrX	+	MXE	Round spermatid
840	ENSMUSG00000018554	Ybx2	chr11	+	MXE	Round spermatid
841	ENSMUSG00000022770	Dlg1	chr16	+	MXE	Round spermatid
842	ENSMUSG00000020564	Atxn7l1	chr12	+	MXE	Round spermatid
843	ENSMUSG00000005362	Crbn	chr6	-	MXE	Round spermatid
844	ENSMUSG00000029068	Ccnl2	chr4	+	MXE	Round spermatid
845	ENSMUSG00000018363	Smurf2	chr11	-	MXE	Round spermatid
846	ENSMUSG00000021891	Mettl6	chr14	-	MXE	Round spermatid
847	ENSMUSG00000032712	2810474O19Rik	chr6	+	MXE	Round spermatid
848	ENSMUSG00000038671	Arfrp1	chr2	-	MXE	Round spermatid
849	ENSMUSG00000040729	Cep126	chr9	-	MXE	Round spermatid
850	ENSMUSG00000025486	Sirt3	chr7	-	MXE	Round spermatid
851	ENSMUSG00000021775	Nr1d2	chr14	-	MXE	Round spermatid
852	ENSMUSG00000044566	Cage1	chr13	-	MXE	Round spermatid
853	ENSMUSG00000017264	Exosc10	chr4	+	MXE	Round spermatid
854	ENSMUSG00000033502	Cdc14a	chr3	-	MXE	Round spermatid
855	ENSMUSG00000073077	Gm7173	chrX	-	MXE	Round spermatid
856	ENSMUSG00000039701	Usp53	chr3	-	MXE	Round spermatid
857	ENSMUSG00000049606	Zfp644	chr5	-	MXE	Round spermatid
858	ENSMUSG00000027751	Supt20	chr3	+	MXE	Round spermatid
859	ENSMUSG00000038773	Kdm3b	chr18	+	MXE	Round spermatid
860	ENSMUSG00000038383	Pigu	chr2	-	MXE	Round spermatid
861	ENSMUSG00000034354	Mtmr3	chr11	-	MXE	Round spermatid
862	ENSMUSG00000028582	Cc2d1b	chr4	+	MXE	Round spermatid
863	ENSMUSG00000059586	Nsmce2	chr15	+	MXE	Round spermatid
864	ENSMUSG00000071454	Dtnb	chr12	+	MXE	Round spermatid
865	ENSMUSG00000003778	Brd8	chr18	-	MXE	Round spermatid
866	ENSMUSG00000074165	Zfp788	chr7	+	MXE	Round spermatid
867	ENSMUSG00000028256	Odf2l	chr3	+	MXE	Round spermatid
868	ENSMUSG00000022404	Slc25a17	chr15	-	MXE	Round spermatid
869	ENSMUSG00000019795	Pcmt1	chr10	-	MXE	Round spermatid
870	ENSMUSG00000022091	Sorbs3	chr14	-	MXE	Round spermatid
871	ENSMUSG00000058239	Usf2	chr7	-	MXE	Round spermatid
872	ENSMUSG00000030982	9030624J02Rik	chr7	+	MXE	Round spermatid
873	ENSMUSG00000039210	Gpatch2	chr1	+	MXE	Round spermatid
874	ENSMUSG00000028878	Fam76a	chr4	-	MXE	Round spermatid
875	ENSMUSG00000037112	Sik2	chr9	-	MXE	Round spermatid
876	ENSMUSG00000020954	Strn3	chr12	-	MXE	Round spermatid
877	ENSMUSG00000026584	Scyl3	chr1	+	MXE	Round spermatid
878	ENSMUSG00000020078	Vps26a	chr10	-	MXE	Round spermatid
879	ENSMUSG00000028484	Psip1	chr4	-	MXE	Round spermatid
880	ENSMUSG00000045103	Dmd	chrX	+	MXE	Round spermatid
881	ENSMUSG00000044252	Osbpl1a	chr18	-	MXE	Round spermatid
882	ENSMUSG00000028964	Park7	chr4	-	MXE	Round spermatid
883	ENSMUSG00000021428	Riok1	chr13	+	MXE	Round spermatid
884	ENSMUSG00000028886	Eya3	chr4	+	MXE	Round spermatid
885	ENSMUSG00000026384	Ptpn4	chr1	-	MXE	Round spermatid
886	ENSMUSG00000022540	Rogdi	chr16	-	MXE	Round spermatid
887	ENSMUSG00000025558	Dock9	chr14	-	MXE	Round spermatid
888	ENSMUSG00000005628	Tmod4	chr3	+	MXE	Round spermatid
889	ENSMUSG00000019966	Kitl	chr10	+	MXE	Round spermatid
890	ENSMUSG00000037720	Tmem33	chr5	+	MXE	Round spermatid
891	ENSMUSG00000039599	Fam149b	chr14	+	MXE	Round spermatid
892	ENSMUSG00000021709	Erbin	chr13	-	MXE	Round spermatid
893	ENSMUSG00000061130	Ppm1b	chr17	+	MXE	Round spermatid
894	ENSMUSG00000018909	Arrb1	chr7	+	MXE	Round spermatid
895	ENSMUSG00000018677	Slc25a39	chr11	-	MXE	Round spermatid
896	ENSMUSG00000036893	Ehmt1	chr2	-	MXE	Round spermatid
897	ENSMUSG00000021771	Vdac2	chr14	+	MXE	Round spermatid
898	ENSMUSG00000027018	Hat1	chr2	+	MXE	Round spermatid
899	ENSMUSG00000026927	Sdccag3	chr2	-	MXE	Round spermatid
900	ENSMUSG00000020982	Nemf	chr12	-	MXE	Round spermatid
901	ENSMUSG00000041765	Ubac2	chr14	+	MXE	Round spermatid
902	ENSMUSG00000022995	Enah	chr1	-	MXE	Round spermatid
903	ENSMUSG00000025512	Chid1	chr7	-	MXE	Round spermatid
904	ENSMUSG00000026309	Ilkap	chr1	-	MXE	Round spermatid
905	ENSMUSG00000028156	Eif4e	chr3	+	MXE	Round spermatid
906	ENSMUSG00000061904	Slc25a3	chr10	-	MXE	Round spermatid
907	ENSMUSG00000028637	Ccdc30	chr4	-	MXE	Round spermatid
908	ENSMUSG00000022680	Pdxdc1	chr16	-	MXE	Round spermatid
909	ENSMUSG00000071337	Tia1	chr6	+	MXE	Round spermatid
910	ENSMUSG00000037426	Depdc5	chr5	+	MXE	Round spermatid
911	ENSMUSG00000036792	Mbd5	chr2	+	MXE	Round spermatid
912	ENSMUSG00000073437	D330041H03Rik	chr17	-	MXE	Round spermatid
913	ENSMUSG00000027469	Tpx2	chr2	+	MXE	Round spermatid
914	ENSMUSG00000030750	Nsmce1	chr7	-	MXE	Round spermatid
915	ENSMUSG00000024165	Hn1l	chr17	-	MXE	Round spermatid
916	ENSMUSG00000058729	Lin9	chr1	+	MXE	Round spermatid
917	ENSMUSG00000032216	Nedd4	chr9	+	MXE	Round spermatid
918	ENSMUSG00000114797	Nupl1	chr14	-	MXE	Round spermatid
919	ENSMUSG00000026991	Pkp4	chr2	+	MXE	Round spermatid
920	ENSMUSG00000018425	Dhx40	chr11	-	MXE	Round spermatid
921	ENSMUSG00000078588	Ccdc24	chr4	-	MXE	Round spermatid
922	ENSMUSG00000074656	Eif2s2	chr2	-	MXE	Round spermatid
923	ENSMUSG00000021552	Gkap1	chr13	-	MXE	Round spermatid
924	ENSMUSG00000029141	Slc4a1ap	chr5	+	MXE	Round spermatid
925	ENSMUSG00000038943	Prc1	chr7	+	MXE	Round spermatid
926	ENSMUSG00000035325	Sec31a	chr5	-	MXE	Round spermatid
927	ENSMUSG00000036501	Fam13b	chr18	-	MXE	Round spermatid
928	ENSMUSG00000023079	Gtf2ird1	chr5	-	MXE	Round spermatid
929	ENSMUSG00000043962	Thrap3	chr4	-	MXE	Round spermatid
930	ENSMUSG00000025423	Pias2	chr18	+	MXE	Round spermatid
931	ENSMUSG00000027170	Eif3m	chr2	-	MXE	Round spermatid
932	ENSMUSG00000055436	Srsf11	chr3	-	MXE	Round spermatid
933	ENSMUSG00000053644	Aldh7a1	chr18	-	MXE	Round spermatid
934	ENSMUSG00000034543	Morc2a	chr11	+	MXE	Round spermatid
935	ENSMUSG00000062604	Srpk2	chr5	-	MXE	Round spermatid
936	ENSMUSG00000052298	Cdc42se2	chr11	-	MXE	Round spermatid
937	ENSMUSG00000015090	Ptgds	chr2	-	MXE	Round spermatid
938	ENSMUSG00000032411	Tfdp2	chr9	+	MXE	Round spermatid
939	ENSMUSG00000024764	Naa40	chr19	-	MXE	Round spermatid
940	ENSMUSG00000037236	Matr3	chr18	+	MXE	Round spermatid
941	ENSMUSG00000028693	Nasp	chr4	-	MXE	Round spermatid
942	ENSMUSG00000012777	Acpt	chr7	-	MXE	Round spermatid
943	ENSMUSG00000039345	Mettl22	chr16	+	MXE	Round spermatid
944	ENSMUSG00000032228	Tcf12	chr9	-	MXE	Round spermatid
945	ENSMUSG00000022708	Zbtb20	chr16	+	MXE	Round spermatid
946	ENSMUSG00000019986	Ahi1	chr10	+	MXE	Round spermatid
947	ENSMUSG00000039233	Tbce	chr13	-	MXE	Round spermatid
948	ENSMUSG00000040785	Ttc3	chr16	+	MXE	Round spermatid
949	ENSMUSG00000025237	Parp6	chr9	+	MXE	Round spermatid
950	ENSMUSG00000021619	Atg10	chr13	-	MXE	Round spermatid
951	ENSMUSG00000000563	Atp5f1	chr3	-	MXE	Round spermatid
952	ENSMUSG00000010721	Lmbr1	chr5	-	MXE	Round spermatid
953	ENSMUSG00000031516	Dctn6	chr8	-	MXE	Round spermatid
954	ENSMUSG00000030846	Tial1	chr7	-	MXE	Round spermatid
955	ENSMUSG00000037795	N4bp2	chr5	+	MXE	Round spermatid
956	ENSMUSG00000035569	Ankrd11	chr8	-	MXE	Round spermatid
957	ENSMUSG00000113525	AC154550.1	chr13	-	MXE	Round spermatid
958	ENSMUSG00000022607	Ptk2	chr15	-	MXE	Round spermatid
959	ENSMUSG00000018372	Cep95	chr11	+	MXE	Round spermatid
960	ENSMUSG00000021235	Coq6	chr12	+	MXE	Round spermatid
961	ENSMUSG00000020520	Galnt10	chr11	+	MXE	Round spermatid
962	ENSMUSG00000046753	Ccdc66	chr14	-	MXE	Round spermatid
963	ENSMUSG00000073643	Wdfy1	chr1	-	MXE	Round spermatid
964	ENSMUSG00000032178	Ilf3	chr9	+	MXE	Round spermatid
965	ENSMUSG00000046434	Hnrnpa1	chr15	+	MXE	Round spermatid
966	ENSMUSG00000067995	Gtf2f2	chr14	-	MXE	Round spermatid
967	ENSMUSG00000041236	Vps41	chr13	+	MXE	Round spermatid
968	ENSMUSG00000025808	Ccdc7a	chr8	-	MXE	Round spermatid
969	ENSMUSG00000029208	Guf1	chr5	+	MXE	Round spermatid
970	ENSMUSG00000030638	Sh3gl3	chr7	+	MXE	Round spermatid
971	ENSMUSG00000035293	G2e3	chr12	+	MXE	Round spermatid
972	ENSMUSG00000030706	Mrpl48	chr7	-	MXE	Round spermatid
973	ENSMUSG00000028437	Ubap1	chr4	+	MXE	Round spermatid
974	ENSMUSG00000043535	Setx	chr2	+	MXE	Round spermatid
975	ENSMUSG00000004056	Akt2	chr7	+	MXE	Round spermatid
976	ENSMUSG00000028343	Erp44	chr4	-	MXE	Round spermatid
977	ENSMUSG00000052102	Gnpda1	chr18	-	MXE	Round spermatid
978	ENSMUSG00000024885	Aldh3b1	chr19	-	MXE	Round spermatid
979	ENSMUSG00000023044	Csad	chr15	-	MXE	Round spermatid
980	ENSMUSG00000034334	Fam151b	chr13	-	MXE	Round spermatid
981	ENSMUSG00000022797	Tfrc	chr16	+	MXE	Round spermatid
982	ENSMUSG00000029406	Pitpnm2	chr5	-	MXE	Round spermatid
983	ENSMUSG00000046679	C87436	chr6	+	MXE	Round spermatid
984	ENSMUSG00000030304	Ergic2	chr6	-	MXE	Round spermatid
985	ENSMUSG00000070371	Prss36	chr7	-	MXE	Round spermatid
986	ENSMUSG00000004633	Chn2	chr6	+	MXE	Round spermatid
987	ENSMUSG00000031711	Zfp330	chr8	-	MXE	Round spermatid
988	ENSMUSG00000050199	Lgr4	chr2	+	MXE	Round spermatid
989	ENSMUSG00000034813	Grip1	chr10	+	MXE	Round spermatid
990	ENSMUSG00000032567	Aste1	chr9	+	MXE	Round spermatid
991	ENSMUSG00000071415	Rpl23	chr11	-	MXE	Round spermatid
992	ENSMUSG00000027942	4933434E20Rik	chr3	+	MXE	Round spermatid
993	ENSMUSG00000061136	Prpf40a	chr2	-	MXE	Round spermatid
994	ENSMUSG00000019843	Fyn	chr10	+	MXE	Round spermatid
995	ENSMUSG00000024055	Cyp4f13	chr17	-	MXE	Round spermatid
996	ENSMUSG00000036606	Plxnb2	chr15	-	MXE	Round spermatid
997	ENSMUSG00000055720	Ubl7	chr9	+	MXE	Round spermatid
998	ENSMUSG00000039108	Lsm14b	chr2	+	MXE	Round spermatid
999	ENSMUSG00000026933	Camsap1	chr2	-	MXE	Round spermatid
1000	ENSMUSG00000061613	U2af1	chr17	-	MXE	Round spermatid
1001	ENSMUSG00000027752	Exosc8	chr3	-	MXE	Round spermatid
1002	ENSMUSG00000057531	Dtnbp1	chr13	-	MXE	Round spermatid
1003	ENSMUSG00000030924	Rexo5	chr7	+	MXE	Round spermatid
1004	ENSMUSG00000009207	Lnpk	chr2	-	MXE	Round spermatid
1005	ENSMUSG00000041958	Pigs	chr11	+	MXE	Round spermatid
1006	ENSMUSG00000029790	Cep41	chr6	-	MXE	Round spermatid
1007	ENSMUSG00000020696	Rffl	chr11	-	MXE	Round spermatid
1008	ENSMUSG00000031644	Nek1	chr8	+	MXE	Round spermatid
1009	ENSMUSG00000040648	Ppip5k2	chr1	-	MXE	Round spermatid
1010	ENSMUSG00000036928	Stag3	chr5	+	MXE	Round spermatid
1011	ENSMUSG00000020380	Rad50	chr11	-	MXE	Round spermatid
1012	ENSMUSG00000024826	Dpf2	chr19	-	MXE	Round spermatid
1013	ENSMUSG00000093456	Gm20662	chr9	+	MXE	Round spermatid
1014	ENSMUSG00000042616	Oscp1	chr4	+	MXE	Round spermatid
1015	ENSMUSG00000027634	Ndrg3	chr2	-	MXE	Round spermatid
1016	ENSMUSG00000038564	Ift172	chr5	-	MXE	Round spermatid
1017	ENSMUSG00000043987	Cep164	chr9	-	MXE	Round spermatid
1018	ENSMUSG00000024430	Cabyr	chr18	+	MXE	Round spermatid
1019	ENSMUSG00000026409	Pfkfb2	chr1	-	MXE	Round spermatid
1020	ENSMUSG00000032594	Ip6k1	chr9	+	MXE	Round spermatid
1021	ENSMUSG00000001419	Mef2d	chr3	+	MXE	Round spermatid
1022	ENSMUSG00000029203	Ube2k	chr5	+	MXE	Round spermatid
1023	ENSMUSG00000053768	Chchd3	chr6	-	MXE	Round spermatid
1024	ENSMUSG00000029017	Pmpcb	chr5	+	MXE	Round spermatid
1025	ENSMUSG00000029202	Pds5a	chr5	-	MXE	Round spermatid
1026	ENSMUSG00000029920	Smarcad1	chr6	+	MXE	Round spermatid
1027	ENSMUSG00000025404	R3hdm2	chr10	+	MXE	Round spermatid
1028	ENSMUSG00000028347	Tmeff1	chr4	+	MXE	Round spermatid
1029	ENSMUSG00000020390	Ube2b	chr11	-	MXE	Round spermatid
1030	ENSMUSG00000000301	Pemt	chr11	-	MXE	Round spermatid
1031	ENSMUSG00000060073	Psma3	chr12	+	MXE	Round spermatid
1032	ENSMUSG00000028649	Macf1	chr4	-	MXE	Round spermatid
1033	ENSMUSG00000032330	Cox7a2	chr9	-	MXE	Round spermatid
1034	ENSMUSG00000002326	Gmpr2	chr14	+	MXE	Round spermatid
1035	ENSMUSG00000041297	Cdk13	chr13	-	MXE	Round spermatid
1036	ENSMUSG00000033799	Fam208b	chr13	-	MXE	Round spermatid
1037	ENSMUSG00000033029	1700088E04Rik	chr15	-	MXE	Round spermatid
1038	ENSMUSG00000027620	Rbm39	chr2	-	MXE	Round spermatid
1039	ENSMUSG00000071866	Ppia	chr11	+	MXE	Round spermatid
1040	ENSMUSG00000028943	Espn	chr4	-	MXE	Round spermatid
1041	ENSMUSG00000026617	Bpnt1	chr1	+	MXE	Round spermatid
1042	ENSMUSG00000038936	Sccpdh	chr1	+	MXE	Round spermatid
1043	ENSMUSG00000021906	Oxnad1	chr14	+	MXE	Round spermatid
1044	ENSMUSG00000035958	Tdp2	chr13	+	MXE	Round spermatid
1045	ENSMUSG00000038546	Ranbp9	chr13	-	MXE	Round spermatid
1046	ENSMUSG00000025290	Rps24	chr14	+	MXE	Round spermatid
1047	ENSMUSG00000038831	Ralgps1	chr2	-	MXE	Round spermatid
1048	ENSMUSG00000006998	Psmd2	chr16	+	MXE	Round spermatid
1049	ENSMUSG00000070738	Dgkd	chr1	+	MXE	Round spermatid
1050	ENSMUSG00000029071	Dvl1	chr4	+	MXE	Round spermatid
1051	ENSMUSG00000090386	Mir99ahg	chr16	+	MXE	Round spermatid
1052	ENSMUSG00000020300	Cpeb4	chr11	+	MXE	Round spermatid
1053	ENSMUSG00000025724	Sec11a	chr7	-	MXE	Round spermatid
1054	ENSMUSG00000064145	Arih2	chr9	-	MXE	Round spermatid
1055	ENSMUSG00000028797	Tmem234	chr4	+	MXE	Round spermatid
1056	ENSMUSG00000059263	Usp47	chr7	+	MXE	Round spermatid
1057	ENSMUSG00000032595	Cdhr4	chr9	+	MXE	Round spermatid
1058	ENSMUSG00000044937	Ttc41	chr10	+	MXE	Round spermatid
1059	ENSMUSG00000066441	Rdh11	chr12	-	MXE	Round spermatid
1060	ENSMUSG00000064307	Lrrc51	chr7	-	MXE	Round spermatid
1061	ENSMUSG00000020949	Fkbp3	chr12	-	MXE	Round spermatid
1062	ENSMUSG00000021910	Nisch	chr14	-	MXE	Round spermatid
1063	ENSMUSG00000022808	Snx4	chr16	+	MXE	Round spermatid
1064	ENSMUSG00000045962	Wnk1	chr6	-	MXE	Round spermatid
1065	ENSMUSG00000037013	Ss18	chr18	-	MXE	Round spermatid
1066	ENSMUSG00000056458	Mok	chr12	-	MXE	Round spermatid
1067	ENSMUSG00000000167	Pih1d2	chr9	+	MXE	Round spermatid
1068	ENSMUSG00000024387	Csnk2b	chr17	-	MXE	Round spermatid
1069	ENSMUSG00000035877	Zhx3	chr2	-	MXE	Round spermatid
1070	ENSMUSG00000032397	Tipin	chr9	+	MXE	Round spermatid
1071	ENSMUSG00000024206	Rfx2	chr17	-	MXE	Round spermatid
1072	ENSMUSG00000053332	Gas5	chr1	+	MXE	Round spermatid
1073	ENSMUSG00000015095	Fbxw5	chr2	+	MXE	Round spermatid
1074	ENSMUSG00000045503	Sys1	chr2	+	MXE	Round spermatid
1075	ENSMUSG00000019699	Akt3	chr1	-	MXE	Round spermatid
1076	ENSMUSG00000061474	Mrps36	chr13	-	MXE	Round spermatid
1077	ENSMUSG00000035919	Bbs9	chr9	+	MXE	Round spermatid
1078	ENSMUSG00000045031	Cetn4	chr3	-	MXE	Round spermatid
1079	ENSMUSG00000051811	Cox6b2	chr7	-	MXE	Round spermatid
1080	ENSMUSG00000019996	Map7	chr10	+	MXE	Round spermatid
1081	ENSMUSG00000030509	Asb7	chr7	-	MXE	Round spermatid
1082	ENSMUSG00000024426	Atat1	chr17	-	MXE	Round spermatid
1083	ENSMUSG00000027680	Fxr1	chr3	+	MXE	Round spermatid
1084	ENSMUSG00000030884	Uqcrc2	chr7	+	MXE	Round spermatid
1085	ENSMUSG00000054280	Prr14l	chr5	-	MXE	Round spermatid
1086	ENSMUSG00000028426	Rad23b	chr4	+	MXE	Round spermatid
1087	ENSMUSG00000028438	Kif24	chr4	-	MXE	Round spermatid
1088	ENSMUSG00000068101	Cenpm	chr15	-	MXE	Round spermatid
1089	ENSMUSG00000032560	Dnajc13	chr9	-	MXE	Round spermatid
1090	ENSMUSG00000018449	Rpain	chr11	+	MXE	Round spermatid
1091	ENSMUSG00000022747	St3gal6	chr16	-	MXE	Round spermatid
1092	ENSMUSG00000054808	Actn4	chr7	-	MXE	Round spermatid
1093	ENSMUSG00000030761	Myo7a	chr7	-	MXE	Round spermatid
1094	ENSMUSG00000020246	Hcfc2	chr10	+	MXE	Round spermatid
1095	ENSMUSG00000036377	C530008M17Rik	chr5	+	MXE	Round spermatid
1096	ENSMUSG00000024122	Pdpk1	chr17	-	MXE	Round spermatid
1097	ENSMUSG00000033632	AW554918	chr18	+	MXE	Round spermatid
1098	ENSMUSG00000014418	Hps5	chr7	-	MXE	Round spermatid
1099	ENSMUSG00000005262	Ufd1	chr16	+	MXE	Round spermatid
1100	ENSMUSG00000030062	Rpn1	chr6	+	MXE	Round spermatid
1101	ENSMUSG00000020698	Cct6b	chr11	-	MXE	Round spermatid
1102	ENSMUSG00000053111	Fank1	chr7	+	MXE	Round spermatid
1103	ENSMUSG00000059208	Hnrnpm	chr17	-	MXE	Round spermatid
1104	ENSMUSG00000006678	Pola1	chrX	-	MXE	Round spermatid
1105	ENSMUSG00000034349	Smc4	chr3	+	MXE	Round spermatid
1106	ENSMUSG00000021012	Zc3h14	chr12	+	MXE	Round spermatid
1107	ENSMUSG00000030276	Ttll3	chr6	+	MXE	Round spermatid
1108	ENSMUSG00000039130	Zc3hc1	chr6	-	MXE	Round spermatid
1109	ENSMUSG00000031575	Ash2l	chr8	-	MXE	Round spermatid
1110	ENSMUSG00000031921	Terf2	chr8	-	MXE	Round spermatid
1111	ENSMUSG00000054405	Dnajc8	chr4	+	MXE	Round spermatid
1112	ENSMUSG00000020415	Pttg1	chr11	-	MXE	Round spermatid
1113	ENSMUSG00000056211	R3hdm1	chr1	+	MXE	Round spermatid
1114	ENSMUSG00000024566	Atp9b	chr18	-	MXE	Round spermatid
1115	ENSMUSG00000003131	Pafah1b2	chr9	-	MXE	Round spermatid
1116	ENSMUSG00000020166	Cnot2	chr10	-	MXE	Round spermatid
1117	ENSMUSG00000038298	Pdzk1	chr3	+	MXE	Round spermatid
1118	ENSMUSG00000038005	Hpf1	chr8	+	MXE	Round spermatid
1119	ENSMUSG00000021273	Fdft1	chr14	-	MXE	Round spermatid
1120	ENSMUSG00000018906	P4ha2	chr11	+	MXE	Round spermatid
1121	ENSMUSG00000021264	Yy1	chr12	+	MXE	Round spermatid
1122	ENSMUSG00000021171	Esyt2	chr12	+	MXE	Round spermatid
1123	ENSMUSG00000041241	Mul1	chr4	+	MXE	Round spermatid
1124	ENSMUSG00000026274	Pask	chr1	-	MXE	Round spermatid
1125	ENSMUSG00000024392	Bag6	chr17	+	MXE	Round spermatid
1126	ENSMUSG00000029076	Sdf4	chr4	+	MXE	Round spermatid
1127	ENSMUSG00000021470	Ercc6l2	chr13	+	MXE	Round spermatid
1128	ENSMUSG00000042508	Dmtf1	chr5	-	MXE	Round spermatid
1129	ENSMUSG00000034088	Hdlbp	chr1	-	MXE	Round spermatid
1130	ENSMUSG00000005899	Smpd4	chr16	+	MXE	Round spermatid
1131	ENSMUSG00000038861	Pi4kb	chr3	+	MXE	Round spermatid
1132	ENSMUSG00000041408	Wapl	chr14	+	MXE	Round spermatid
1133	ENSMUSG00000008855	Hdac5	chr11	-	MXE	Round spermatid
1134	ENSMUSG00000070883	Ccdc173	chr2	-	MXE	Round spermatid
1135	ENSMUSG00000032267	Usp28	chr9	+	MXE	Round spermatid
1136	ENSMUSG00000045411	2410002F23Rik	chr7	+	MXE	Round spermatid
1137	ENSMUSG00000044573	Acp1	chr12	-	MXE	Round spermatid
1138	ENSMUSG00000030410	Dmwd	chr7	+	MXE	Round spermatid
1139	ENSMUSG00000041028	Ghitm	chr14	-	MXE	Round spermatid
1140	ENSMUSG00000030850	Ate1	chr7	-	MXE	Round spermatid
1141	ENSMUSG00000028487	Bnc2	chr4	-	MXE	Round spermatid
1142	ENSMUSG00000056962	Jmjd6	chr11	-	MXE	Round spermatid
1143	ENSMUSG00000036768	Kif15	chr9	+	MXE	Round spermatid
1144	ENSMUSG00000029290	Zfp326	chr5	+	MXE	Round spermatid
1145	ENSMUSG00000038482	Tfdp1	chr8	+	MXE	Round spermatid
1146	ENSMUSG00000044906	4930503L19Rik	chr18	-	MXE	Round spermatid
1147	ENSMUSG00000037697	Ddhd1	chr14	-	MXE	Round spermatid
1148	ENSMUSG00000040451	Sgms1	chr19	-	MXE	Round spermatid
1149	ENSMUSG00000060126	Tpt1	chr14	+	MXE	Round spermatid
1150	ENSMUSG00000020115	Tbk1	chr10	-	MXE	Round spermatid
1151	ENSMUSG00000020456	Ogdh	chr11	+	MXE	Round spermatid
1152	ENSMUSG00000027642	Rpn2	chr2	+	MXE	Round spermatid
1153	ENSMUSG00000007564	Ppp2r1a	chr17	+	MXE	Round spermatid
1154	ENSMUSG00000037012	Hk1	chr10	-	MXE	Round spermatid
1155	ENSMUSG00000002076	Hsf2bp	chr17	-	MXE	Round spermatid
1156	ENSMUSG00000022142	Nup155	chr15	+	MXE	Round spermatid
1157	ENSMUSG00000030691	Fchsd2	chr7	+	MXE	Round spermatid
1158	ENSMUSG00000086451	4933431K23Rik	chr8	+	MXE	Round spermatid
1159	ENSMUSG00000027570	Col9a3	chr2	+	MXE	Round spermatid
1160	ENSMUSG00000030064	Frmd4b	chr6	-	MXE	Round spermatid
1161	ENSMUSG00000023010	Tmbim6	chr15	+	MXE	Round spermatid
1162	ENSMUSG00000027309	4930402H24Rik	chr2	-	MXE	Round spermatid
1163	ENSMUSG00000020461	Clhc1	chr11	+	MXE	Round spermatid
1164	ENSMUSG00000028563	Tm2d1	chr4	-	MXE	Round spermatid
1165	ENSMUSG00000026825	Dnm1	chr2	-	MXE	Round spermatid
1166	ENSMUSG00000032030	Cul5	chr9	-	MXE	Round spermatid
1167	ENSMUSG00000006315	Tmem147	chr7	-	MXE	Round spermatid
1168	ENSMUSG00000021115	Vrk1	chr12	+	MXE	Round spermatid
1169	ENSMUSG00000039988	Ankrd13c	chr3	+	MXE	Round spermatid
1170	ENSMUSG00000031848	Lsm4	chr8	+	MXE	Round spermatid
1171	ENSMUSG00000023809	Rps6ka2	chr17	+	MXE	Round spermatid
1172	ENSMUSG00000018565	Elp5	chr11	-	MXE	Round spermatid
1173	ENSMUSG00000039294	BC017643	chr11	-	MXE	Round spermatid
1174	ENSMUSG00000048249	Crebrf	chr17	+	MXE	Round spermatid
1175	ENSMUSG00000025816	Sec61a2	chr2	-	MXE	Round spermatid
1176	ENSMUSG00000033423	Eri3	chr4	+	MXE	Round spermatid
1177	ENSMUSG00000003308	Keap1	chr9	-	MXE	Round spermatid
1178	ENSMUSG00000034252	Senp6	chr9	+	MXE	Round spermatid
1179	ENSMUSG00000036086	Zranb3	chr1	-	MXE	Round spermatid
1180	ENSMUSG00000035382	Pcsk7	chr9	+	MXE	Round spermatid
1181	ENSMUSG00000021096	Ppm1a	chr12	+	MXE	Round spermatid
1182	ENSMUSG00000020102	Slc16a7	chr10	-	MXE	Round spermatid
1183	ENSMUSG00000019818	Cd164	chr10	+	MXE	Round spermatid
1184	ENSMUSG00000054823	Nsd3	chr8	+	MXE	Round spermatid
1185	ENSMUSG00000003559	As3mt	chr19	+	MXE	Round spermatid
1186	ENSMUSG00000020528	Prpsap2	chr11	-	MXE	Round spermatid
1187	ENSMUSG00000071645	Tut1	chr19	+	MXE	Round spermatid
1188	ENSMUSG00000034164	Emid1	chr11	-	MXE	Round spermatid
1189	ENSMUSG00000019878	Hsf2	chr10	+	MXE	Round spermatid
1190	ENSMUSG00000033335	Dnm2	chr9	+	MXE	Round spermatid
1191	ENSMUSG00000022914	Brwd1	chr16	-	MXE	Round spermatid
1192	ENSMUSG00000030447	Cyfip1	chr7	+	MXE	Round spermatid
1193	ENSMUSG00000087177	E130307A14Rik	chr10	-	MXE	Round spermatid
1194	ENSMUSG00000027931	Npr1	chr3	-	MXE	Round spermatid
1195	ENSMUSG00000029814	Igf2bp3	chr6	-	MXE	Round spermatid
1196	ENSMUSG00000030815	Phkg2	chr7	+	MXE	Round spermatid
1197	ENSMUSG00000109378	U2af1l4	chr7	+	MXE	Round spermatid
1198	ENSMUSG00000086587	Gm11837	chr4	+	MXE	Round spermatid
1199	ENSMUSG00000028140	Mrpl9	chr3	+	MXE	Round spermatid
1200	ENSMUSG00000037627	Rgs22	chr15	-	MXE	Round spermatid
1201	ENSMUSG00000035376	Hacd2	chr16	+	MXE	Round spermatid
1202	ENSMUSG00000001418	Glmp	chr3	+	MXE	Round spermatid
1203	ENSMUSG00000040746	Rnf167	chr11	+	MXE	Round spermatid
1204	ENSMUSG00000046707	Csnk2a2	chr8	-	MXE	Round spermatid
1205	ENSMUSG00000026743	Mllt10	chr2	+	MXE	Round spermatid
1206	ENSMUSG00000020642	Rnf144a	chr12	-	MXE	Round spermatid
1207	ENSMUSG00000018567	Gabarap	chr11	+	MXE	Round spermatid
1208	ENSMUSG00000028182	Lrriq3	chr3	+	MXE	Round spermatid
1209	ENSMUSG00000033543	Gtf2a2	chr9	+	MXE	Round spermatid
1210	ENSMUSG00000024527	Afg3l2	chr18	-	MXE	Round spermatid
1211	ENSMUSG00000021870	Slmap	chr14	-	MXE	Round spermatid
1212	ENSMUSG00000011658	Fuz	chr7	+	MXE	Round spermatid
1213	ENSMUSG00000068758	Il3ra	chr14	+	MXE	Round spermatid
1214	ENSMUSG00000025373	Rnf41	chr10	+	MXE	Round spermatid
1215	ENSMUSG00000020777	Acox1	chr11	-	MXE	Round spermatid
1216	ENSMUSG00000027201	Myef2	chr2	-	MXE	Round spermatid
1217	ENSMUSG00000025786	Zdhhc3	chr9	-	MXE	Round spermatid
1218	ENSMUSG00000054252	Fgfr3	chr5	+	MXE	Round spermatid
1219	ENSMUSG00000047213	Ythdf3	chr3	+	MXE	Round spermatid
1220	ENSMUSG00000034401	Spata6	chr4	+	MXE	Round spermatid
1221	ENSMUSG00000028134	Ptbp2	chr3	-	MXE	Round spermatid
1222	ENSMUSG00000022983	Scaf4	chr16	-	MXE	Round spermatid
1223	ENSMUSG00000052926	Rnaseh2a	chr8	-	MXE	Round spermatid
1224	ENSMUSG00000032892	Rangrf	chr11	-	MXE	Round spermatid
1225	ENSMUSG00000010406	Mrpl52	chr14	+	MXE	Round spermatid
1226	ENSMUSG00000002228	Ppm1j	chr3	+	MXE	Round spermatid
1227	ENSMUSG00000002428	Hltf	chr3	+	MXE	Round spermatid
1228	ENSMUSG00000028070	Naxe	chr3	-	MXE	Round spermatid
1229	ENSMUSG00000025153	Fasn	chr11	-	MXE	Round spermatid
1230	ENSMUSG00000022789	Dnm1l	chr16	-	MXE	Round spermatid
1231	ENSMUSG00000026683	Nuf2	chr1	-	MXE	Round spermatid
1232	ENSMUSG00000028391	Wdr31	chr4	-	MXE	Round spermatid
1233	ENSMUSG00000024357	Sil1	chr18	-	MXE	Round spermatid
1234	ENSMUSG00000032359	Ctsh	chr9	+	MXE	Round spermatid
1235	ENSMUSG00000031987	Egln1	chr8	-	MXE	Round spermatid
1236	ENSMUSG00000035642	Aamdc	chr7	-	MXE	Round spermatid
1237	ENSMUSG00000061983	Rps12	chr10	-	MXE	Round spermatid
1238	ENSMUSG00000001120	Pcbp3	chr10	-	MXE	Round spermatid
1239	ENSMUSG00000017843	Ppp2r5c	chr12	+	MXE	Round spermatid
1240	ENSMUSG00000020903	Stx8	chr11	+	MXE	Round spermatid
1241	ENSMUSG00000021901	Bap1	chr14	+	MXE	Round spermatid
1242	ENSMUSG00000024293	Esco1	chr18	-	MXE	Round spermatid
1243	ENSMUSG00000073678	Pgap1	chr1	-	MXE	Round spermatid
1244	ENSMUSG00000055322	Tns1	chr1	-	MXE	Round spermatid
1245	ENSMUSG00000020590	Snx13	chr12	+	MXE	Round spermatid
1246	ENSMUSG00000000600	Krit1	chr5	+	MXE	Round spermatid
1247	ENSMUSG00000031753	Cog4	chr8	+	MXE	Round spermatid
1248	ENSMUSG00000024937	Ehbp1l1	chr19	-	MXE	Round spermatid
1249	ENSMUSG00000047879	Usp14	chr18	-	MXE	Round spermatid
1250	ENSMUSG00000020268	Lyrm7	chr11	-	MXE	Round spermatid
1251	ENSMUSG00000033991	Ttc37	chr13	+	MXE	Round spermatid
1252	ENSMUSG00000028820	Sfpq	chr4	+	MXE	Round spermatid
1253	ENSMUSG00000032294	Pkm	chr9	+	MXE	Round spermatid
1254	ENSMUSG00000054400	Cklf	chr8	+	MXE	Round spermatid
1255	ENSMUSG00000005882	Uqcc1	chr2	-	MXE	Round spermatid
1256	ENSMUSG00000033122	Hsd17b3	chr13	-	MXE	Round spermatid
1257	ENSMUSG00000030557	Mef2a	chr7	-	MXE	Round spermatid
1258	ENSMUSG00000014668	Chfr	chr5	+	MXE	Round spermatid
1259	ENSMUSG00000039298	Cdk5rap2	chr4	-	MXE	Round spermatid
1260	ENSMUSG00000029687	Ezh2	chr6	-	MXE	Round spermatid
1261	ENSMUSG00000023935	Spats1	chr17	-	MXE	Round spermatid
1262	ENSMUSG00000035152	Ap2b1	chr11	+	MXE	Round spermatid
1263	ENSMUSG00000027002	Nckap1	chr2	-	MXE	Round spermatid
1264	ENSMUSG00000033216	Eefsec	chr6	-	MXE	Round spermatid
1265	ENSMUSG00000026150	Mff	chr1	+	MXE	Round spermatid
1266	ENSMUSG00000032396	Dis3l	chr9	-	MXE	Round spermatid
1267	ENSMUSG00000032777	Gtf3c1	chr7	-	MXE	Round spermatid
1268	ENSMUSG00000039176	Polg	chr7	-	MXE	Round spermatid
1269	ENSMUSG00000034566	Atp5h	chr11	-	MXE	Round spermatid
1270	ENSMUSG00000022246	Rai14	chr15	-	MXE	Round spermatid
1271	ENSMUSG00000024317	Rnf138	chr18	+	MXE	Round spermatid
1272	ENSMUSG00000059714	Flot1	chr17	+	MXE	Round spermatid
1273	ENSMUSG00000079685	Ulbp1	chr10	-	MXE	Round spermatid
1274	ENSMUSG00000034108	Ccs	chr19	-	MXE	Round spermatid
1275	ENSMUSG00000022956	Atp5o	chr16	-	MXE	Round spermatid
1276	ENSMUSG00000092203	1110038B12Rik	chr17	-	MXE	Round spermatid
1277	ENSMUSG00000055065	Ddx17	chr15	-	MXE	Round spermatid
1278	ENSMUSG00000026571	Dcaf6	chr1	-	MXE	Round spermatid
1279	ENSMUSG00000040859	Bsdc1	chr4	+	MXE	Round spermatid
1280	ENSMUSG00000063952	Brpf3	chr17	+	MXE	Round spermatid
1281	ENSMUSG00000015083	C8g	chr2	-	MXE	Round spermatid
1282	ENSMUSG00000039068	Zzz3	chr3	+	MXE	Round spermatid
1283	ENSMUSG00000052337	Immt	chr6	+	MXE	Round spermatid
1284	ENSMUSG00000038777	Sema6c	chr3	+	MXE	Round spermatid
1285	ENSMUSG00000020697	Lig3	chr11	+	MXE	Round spermatid
1286	ENSMUSG00000058704	Memo1	chr17	-	MXE	Round spermatid
1287	ENSMUSG00000003269	Cyth2	chr7	-	MXE	Round spermatid
1288	ENSMUSG00000021952	Xpo4	chr14	-	MXE	Round spermatid
1289	ENSMUSG00000032582	Rbm6	chr9	-	MXE	Round spermatid
1290	ENSMUSG00000032615	Nt5m	chr11	+	MXE	Round spermatid
1291	ENSMUSG00000019948	Actr6	chr10	-	MXE	Round spermatid
1292	ENSMUSG00000028782	Adgrb2	chr4	+	MXE	Round spermatid
1293	ENSMUSG00000026103	Gls	chr1	-	MXE	Round spermatid
1294	ENSMUSG00000022477	Aco2	chr15	+	MXE	Round spermatid
1295	ENSMUSG00000039307	Hexdc	chr11	+	MXE	Round spermatid
1296	ENSMUSG00000034075	Zdhhc5	chr2	-	MXE	Round spermatid
1297	ENSMUSG00000029836	Cbx3	chr6	+	MXE	Round spermatid
1298	ENSMUSG00000055531	Cpsf6	chr10	-	MXE	Round spermatid
1299	ENSMUSG00000057858	Fam204a	chr19	-	MXE	Round spermatid
1300	ENSMUSG00000008892	Vdac3	chr8	-	MXE	Round spermatid
1301	ENSMUSG00000026790	Odf2	chr2	+	MXE	Round spermatid
1302	ENSMUSG00000030323	Ift122	chr6	+	MXE	Round spermatid
1303	ENSMUSG00000042185	Nfrkb	chr9	+	MXE	Round spermatid
1304	ENSMUSG00000038264	Sema7a	chr9	+	MXE	Round spermatid
1305	ENSMUSG00000054051	Ercc6	chr14	+	MXE	Round spermatid
1306	ENSMUSG00000058388	Phtf1	chr3	+	MXE	Round spermatid
1307	ENSMUSG00000037995	Igsf9	chr1	+	MXE	Round spermatid
1308	ENSMUSG00000033808	Tmem87a	chr2	-	MXE	Round spermatid
1309	ENSMUSG00000026554	Dcaf8	chr1	+	MXE	Round spermatid
1310	ENSMUSG00000026021	Sumo1	chr1	-	MXE	Round spermatid
1311	ENSMUSG00000027067	Ssrp1	chr2	+	MXE	Round spermatid
1312	ENSMUSG00000018736	Ndel1	chr11	-	MXE	Round spermatid
1313	ENSMUSG00000058835	Abi1	chr2	-	MXE	Round spermatid
1314	ENSMUSG00000036817	Sun1	chr5	+	MXE	Round spermatid
1315	ENSMUSG00000024462	Gabbr1	chr17	+	MXE	Round spermatid
1316	ENSMUSG00000034681	Rnps1	chr17	+	MXE	Round spermatid
1317	ENSMUSG00000027598	Itch	chr2	+	MXE	Round spermatid
1318	ENSMUSG00000040594	Ranbp17	chr11	-	MXE	Round spermatid
1319	ENSMUSG00000016918	Sulf1	chr1	+	MXE	Round spermatid
1320	ENSMUSG00000023150	Ivns1abp	chr1	+	MXE	Round spermatid
1321	ENSMUSG00000001829	Clpb	chr7	+	MXE	Round spermatid
1322	ENSMUSG00000028158	Mttp	chr3	-	MXE	Round spermatid
1323	ENSMUSG00000029433	Diablo	chr5	-	MXE	Round spermatid
1324	ENSMUSG00000004069	Dnaja3	chr16	+	MXE	Round spermatid
1325	ENSMUSG00000040850	Psme4	chr11	+	MXE	Round spermatid
1326	ENSMUSG00000035674	Ndufa3	chr7	+	MXE	Round spermatid
1327	ENSMUSG00000022377	Asap1	chr15	-	MXE	Round spermatid
1328	ENSMUSG00000020448	Rnf185	chr11	-	MXE	Round spermatid
1329	ENSMUSG00000024068	Spast	chr17	+	MXE	Round spermatid
1330	ENSMUSG00000029328	Hnrnpdl	chr5	-	MXE	Round spermatid
1331	ENSMUSG00000033306	Lpp	chr16	+	MXE	Round spermatid
1332	ENSMUSG00000016458	Wt1	chr2	+	MXE	Round spermatid
1333	ENSMUSG00000039285	Azi2	chr9	+	MXE	Round spermatid
1334	ENSMUSG00000026482	Rgl1	chr1	-	MXE	Round spermatid
1335	ENSMUSG00000032316	Clk3	chr9	-	MXE	Round spermatid
1336	ENSMUSG00000023088	Abcc1	chr16	+	MXE	Round spermatid
1337	ENSMUSG00000062270	Morf4l1	chr9	-	MXE	Round spermatid
1338	ENSMUSG00000069135	Fgfr1op	chr17	+	MXE	Round spermatid
1339	ENSMUSG00000061882	Ccdc62	chr5	+	MXE	Round spermatid
1340	ENSMUSG00000020694	Tlk2	chr11	+	MXE	Round spermatid
1341	ENSMUSG00000027472	Pdrg1	chr2	-	MXE	Round spermatid
1342	ENSMUSG00000032621	Srek1	chr13	-	MXE	Round spermatid
1343	ENSMUSG00000034940	Synrg	chr11	+	MXE	Round spermatid
1344	ENSMUSG00000021686	Ap3b1	chr13	+	MXE	Round spermatid
1345	ENSMUSG00000022378	Fam49b	chr15	-	MXE	Round spermatid
1346	ENSMUSG00000021276	Cinp	chr12	-	MXE	Round spermatid
1347	ENSMUSG00000027131	Emc4	chr2	-	MXE	Round spermatid
1348	ENSMUSG00000012609	Ttll5	chr12	+	MXE	Round spermatid
1349	ENSMUSG00000018995	Nars2	chr7	+	MXE	Round spermatid
1350	ENSMUSG00000038535	Zfp280d	chr9	+	MXE	Round spermatid
1351	ENSMUSG00000027287	Snap23	chr2	+	MXE	Round spermatid
1352	ENSMUSG00000029287	Tgfbr3	chr5	-	MXE	Round spermatid
1353	ENSMUSG00000044712	Slc38a6	chr12	+	MXE	Round spermatid
1354	ENSMUSG00000022201	Zfr	chr15	+	MXE	Round spermatid
1355	ENSMUSG00000019978	Epb41l2	chr10	+	MXE	Round spermatid
1356	ENSMUSG00000030704	Rab6a	chr7	+	MXE	Round spermatid
1357	ENSMUSG00000028944	Prkag2	chr5	-	MXE	Round spermatid
1358	ENSMUSG00000034194	R3hcc1	chr14	-	MXE	Round spermatid
1359	ENSMUSG00000028760	Eif4g3	chr4	+	MXE	Round spermatid
1360	ENSMUSG00000027708	Dcun1d1	chr3	-	MXE	Round spermatid
1361	ENSMUSG00000037824	Tspan14	chr14	-	MXE	Round spermatid
1362	ENSMUSG00000024539	Ptpn2	chr18	-	MXE	Round spermatid
1363	ENSMUSG00000057133	Chd6	chr2	-	MXE	Round spermatid
1364	ENSMUSG00000000579	Dynlt1c	chr17	+	MXE	Round spermatid
1365	ENSMUSG00000057530	Ece1	chr4	+	MXE	Round spermatid
1366	ENSMUSG00000027635	Dsn1	chr2	-	MXE	Round spermatid
1367	ENSMUSG00000058318	Phf21a	chr2	+	MXE	Round spermatid
1368	ENSMUSG00000031586	Rbpms	chr8	-	MXE	Round spermatid
1369	ENSMUSG00000054387	Mdm4	chr1	-	MXE	Round spermatid
1370	ENSMUSG00000041144	Dnah7b	chr1	+	MXE	Round spermatid
1371	ENSMUSG00000061533	Cep128	chr12	-	MXE	Round spermatid
1372	ENSMUSG00000036678	Aaas	chr15	-	MXE	Round spermatid
1373	ENSMUSG00000020593	Lpin1	chr12	-	MXE	Round spermatid
1374	ENSMUSG00000033705	Stard9	chr2	+	MXE	Round spermatid
1375	ENSMUSG00000040428	Plekha4	chr7	+	MXE	Round spermatid
1376	ENSMUSG00000021103	Mnat1	chr12	+	MXE	Round spermatid
1377	ENSMUSG00000025217	Btrc	chr19	+	MXE	Round spermatid
1378	ENSMUSG00000001416	Cct3	chr3	+	MXE	Round spermatid
1379	ENSMUSG00000026924	Sec16a	chr2	-	MXE	Round spermatid
1380	ENSMUSG00000024941	Scyl1	chr19	-	MXE	Round spermatid
1381	ENSMUSG00000074500	Zfp558	chr9	-	MXE	Round spermatid
1382	ENSMUSG00000037801	Iqch	chr9	-	MXE	Round spermatid
1383	ENSMUSG00000073433	Arhgdig	chr17	-	MXE	Round spermatid
1384	ENSMUSG00000039041	Adrm1	chr2	+	MXE	Round spermatid
1385	ENSMUSG00000029165	Agbl5	chr5	+	MXE	Round spermatid
1386	ENSMUSG00000018428	Akap1	chr11	-	MXE	Round spermatid
1387	ENSMUSG00000008668	Rps18	chr17	-	MXE	Round spermatid
1388	ENSMUSG00000041870	Ankrd13a	chr5	+	MXE	Round spermatid
1389	ENSMUSG00000022529	Zfp263	chr16	+	MXE	Round spermatid
1390	ENSMUSG00000021936	Mapk8	chr14	-	MXE	Round spermatid
1391	ENSMUSG00000035765	Dym	chr18	+	MXE	Round spermatid
1392	ENSMUSG00000038705	Gmeb2	chr2	-	MXE	Round spermatid
1393	ENSMUSG00000003341	Atp8b3	chr10	-	MXE	Round spermatid
1394	ENSMUSG00000021051	Ppp2r5e	chr12	-	MXE	Round spermatid
1395	ENSMUSG00000000001	Gnai3	chr3	-	MXE	Round spermatid
1396	ENSMUSG00000024191	Bnip1	chr17	+	MXE	Round spermatid
1397	ENSMUSG00000026153	Fam135a	chr1	-	MXE	Round spermatid
1398	ENSMUSG00000053333	Dis3l2	chr1	+	MXE	Round spermatid
1399	ENSMUSG00000033102	Cdc14b	chr13	-	MXE	Round spermatid
1400	ENSMUSG00000025979	Mob4	chr1	+	MXE	Round spermatid
1401	ENSMUSG00000042439	Zfp532	chr18	+	MXE	Round spermatid
1402	ENSMUSG00000029127	Zbtb49	chr5	-	MXE	Round spermatid
1403	ENSMUSG00000004070	Hmox2	chr16	+	MXE	Round spermatid
1404	ENSMUSG00000038722	Bud31	chr5	+	MXE	Round spermatid
1405	ENSMUSG00000015357	Clpx	chr9	+	MXE	Round spermatid
1406	ENSMUSG00000070493	Chchd2	chr5	-	MXE	Round spermatid
1407	ENSMUSG00000027822	Slc33a1	chr3	-	MXE	Round spermatid
1408	ENSMUSG00000062991	Nrg1	chr8	-	MXE	Round spermatid
1409	ENSMUSG00000031967	Afg3l1	chr8	+	MXE	Round spermatid
1410	ENSMUSG00000042810	Krba1	chr6	+	MXE	Round spermatid
1411	ENSMUSG00000046138	9930021J03Rik	chr19	-	MXE	Round spermatid
1412	ENSMUSG00000038965	Ube2l3	chr16	-	MXE	Round spermatid
1413	ENSMUSG00000020687	Cdc27	chr11	-	MXE	Round spermatid
1414	ENSMUSG00000032740	Ccdc88a	chr11	+	MXE	Round spermatid
1415	ENSMUSG00000052833	Sae1	chr7	-	MXE	Round spermatid
1416	ENSMUSG00000030759	Far1	chr7	+	MXE	Round spermatid
1417	ENSMUSG00000001729	Akt1	chr12	-	MXE	Round spermatid
1418	ENSMUSG00000020282	Rhbdf1	chr11	-	MXE	Round spermatid
1419	ENSMUSG00000026219	Trip12	chr1	-	MXE	Round spermatid
1420	ENSMUSG00000054611	Kdm2a	chr19	-	MXE	Round spermatid
1421	ENSMUSG00000032336	Nptn	chr9	+	MXE	Round spermatid
1422	ENSMUSG00000038208	Pgap3	chr11	-	MXE	Round spermatid
1423	ENSMUSG00000036054	Sugp2	chr8	+	MXE	Round spermatid
1424	ENSMUSG00000042628	Zfyve1	chr12	-	MXE	Round spermatid
1425	ENSMUSG00000056310	Tyw1	chr5	+	MXE	Round spermatid
1426	ENSMUSG00000032076	Cadm1	chr9	+	MXE	Round spermatid
1427	ENSMUSG00000000127	Fer	chr17	+	MXE	Round spermatid
1428	ENSMUSG00000020257	Wdr82	chr9	+	MXE	Round spermatid
1429	ENSMUSG00000031938	4931406C07Rik	chr9	-	MXE	Round spermatid
1430	ENSMUSG00000030534	Vps33b	chr7	+	MXE	Round spermatid
1431	ENSMUSG00000021902	Phf7	chr14	-	MXE	Round spermatid
1432	ENSMUSG00000032212	Sltm	chr9	+	MXE	Round spermatid
1433	ENSMUSG00000055897	Ppp4r1l-ps	chr2	-	MXE	Round spermatid
1434	ENSMUSG00000074698	Csnk2a1	chr2	+	MXE	Round spermatid
1435	ENSMUSG00000004865	Srpk1	chr17	-	MXE	Round spermatid
1436	ENSMUSG00000029735	Tpk1	chr6	-	MXE	Round spermatid
1437	ENSMUSG00000024335	Brd2	chr17	-	MXE	Round spermatid
1438	ENSMUSG00000036097	Slf2	chr19	+	MXE	Round spermatid
1439	ENSMUSG00000032478	Nme6	chr9	+	MXE	Round spermatid
1440	ENSMUSG00000057367	Birc2	chr9	-	MXE	Round spermatid
1441	ENSMUSG00000001039	B9d1	chr11	+	MXE	Round spermatid
1442	ENSMUSG00000037174	Elf2	chr3	-	MXE	Round spermatid
1443	ENSMUSG00000039753	Fbxl5	chr5	-	MXE	Round spermatid
1444	ENSMUSG00000037286	Stag1	chr9	+	MXE	Round spermatid
1445	ENSMUSG00000032278	Paqr5	chr9	-	MXE	Round spermatid
1446	ENSMUSG00000020719	Ddx5	chr11	-	MXE	Round spermatid
1447	ENSMUSG00000051768	Xrcc1	chr7	+	MXE	Round spermatid
1448	ENSMUSG00000053510	Nrd1	chr4	+	MXE	Round spermatid
1449	ENSMUSG00000036550	Cnot1	chr8	-	MXE	Round spermatid
1450	ENSMUSG00000028572	Hook1	chr4	+	MXE	Round spermatid
1451	ENSMUSG00000030034	Ino80b	chr6	-	MXE	Round spermatid
1452	ENSMUSG00000028252	Ccnc	chr4	+	MXE	Round spermatid
1453	ENSMUSG00000007739	Cct4	chr11	+	MXE	Round spermatid
1454	ENSMUSG00000024491	Rbm27	chr18	+	MXE	Round spermatid
1455	ENSMUSG00000059288	Cdyl	chr13	+	MXE	Round spermatid
1456	ENSMUSG00000039842	Mcph1	chr8	+	MXE	Round spermatid
1457	ENSMUSG00000020385	Clk4	chr11	+	MXE	Round spermatid
1458	ENSMUSG00000021111	Papola	chr12	+	MXE	Round spermatid
1459	ENSMUSG00000021576	Pdcd6	chr13	-	MXE	Round spermatid
1460	ENSMUSG00000034269	Setd5	chr6	+	MXE	Round spermatid
1461	ENSMUSG00000022124	Fbxl3	chr14	-	MXE	Round spermatid
1462	ENSMUSG00000031928	Mre11a	chr9	+	MXE	Round spermatid
1463	ENSMUSG00000022231	Sema5a	chr15	+	MXE	Round spermatid
1464	ENSMUSG00000029622	Arpc1b	chr5	+	MXE	Round spermatid
1465	ENSMUSG00000029647	Pan3	chr5	+	MXE	Round spermatid
1466	ENSMUSG00000035284	Vps13c	chr9	+	MXE	Round spermatid
1467	ENSMUSG00000030654	Arl6ip1	chr7	-	MXE	Round spermatid
1468	ENSMUSG00000026174	Cnot9	chr1	+	MXE	Round spermatid
1469	ENSMUSG00000041225	Arhgap12	chr18	-	MXE	Round spermatid
1470	ENSMUSG00000028464	Tpm2	chr4	-	RI	Round spermatid
1471	ENSMUSG00000021670	Hmgcr	chr13	-	RI	Round spermatid
1472	ENSMUSG00000042396	Rbm7	chr9	-	RI	Round spermatid
1473	ENSMUSG00000025474	Tubgcp2	chr7	-	RI	Round spermatid
1474	ENSMUSG00000031985	Gnpat	chr8	+	RI	Round spermatid
1475	ENSMUSG00000030795	Fus	chr7	+	RI	Round spermatid
1476	ENSMUSG00000022617	Chkb	chr15	-	RI	Round spermatid
1477	ENSMUSG00000036138	Acaa1a	chr9	+	RI	Round spermatid
1478	ENSMUSG00000020883	Fbxl20	chr11	-	RI	Round spermatid
1479	ENSMUSG00000020486	Sept4	chr11	+	RI	Round spermatid
1480	ENSMUSG00000008690	Ncaph2	chr15	+	RI	Round spermatid
1481	ENSMUSG00000027610	Gss	chr2	-	RI	Round spermatid
1482	ENSMUSG00000022884	Eif4a2	chr16	+	RI	Round spermatid
1483	ENSMUSG00000026048	Ercc5	chr1	+	RI	Round spermatid
1484	ENSMUSG00000042328	Hps4	chr5	+	RI	Round spermatid
1485	ENSMUSG00000032580	Rbm5	chr9	-	RI	Round spermatid
1486	ENSMUSG00000011877	Git1	chr11	+	RI	Round spermatid
1487	ENSMUSG00000036281	Snapc4	chr2	-	RI	Round spermatid
1488	ENSMUSG00000042487	Leo1	chr9	+	RI	Round spermatid
1489	ENSMUSG00000078762	Haus5	chr7	-	RI	Round spermatid
1490	ENSMUSG00000031505	Naxd	chr8	+	RI	Round spermatid
1491	ENSMUSG00000053553	3110082I17Rik	chr5	-	RI	Round spermatid
1492	ENSMUSG00000032553	Srprb	chr9	-	RI	Round spermatid
1493	ENSMUSG00000036529	Sbf1	chr15	-	RI	Round spermatid
1494	ENSMUSG00000014856	Tmem208	chr8	+	RI	Round spermatid
1495	ENSMUSG00000040054	Baz2a	chr10	+	RI	Round spermatid
1496	ENSMUSG00000026782	Abi2	chr1	+	RI	Round spermatid
1497	ENSMUSG00000027667	Zfp639	chr3	+	RI	Round spermatid
1498	ENSMUSG00000003226	Ranbp2	chr10	+	RI	Round spermatid
1499	ENSMUSG00000031511	Arhgef7	chr8	+	RI	Round spermatid
1500	ENSMUSG00000039220	Ppp1r10	chr17	+	RI	Round spermatid
1501	ENSMUSG00000022978	Mis18a	chr16	-	RI	Round spermatid
1502	ENSMUSG00000031232	Magt1	chrX	-	RI	Round spermatid
1503	ENSMUSG00000040599	Mis12	chr11	+	RI	Round spermatid
1504	ENSMUSG00000063800	Prpf38a	chr4	-	RI	Round spermatid
1505	ENSMUSG00000079179	Rab10os	chr12	+	RI	Round spermatid
1506	ENSMUSG00000005481	Ddx39	chr8	+	RI	Round spermatid
1507	ENSMUSG00000031601	Cnot7	chr8	-	RI	Round spermatid
1508	ENSMUSG00000004455	Ppp1cc	chr5	+	RI	Round spermatid
1509	ENSMUSG00000034525	Ice1	chr13	-	RI	Round spermatid
1510	ENSMUSG00000038685	Rtel1	chr2	+	RI	Round spermatid
1511	ENSMUSG00000039254	Pomt1	chr2	+	RI	Round spermatid
1512	ENSMUSG00000098754	Prn	chr2	+	RI	Round spermatid
1513	ENSMUSG00000020284	1810043G02Rik	chr10	+	RI	Round spermatid
1514	ENSMUSG00000041459	Tardbp	chr4	-	RI	Round spermatid
1515	ENSMUSG00000037916	Ndufv1	chr19	-	RI	Round spermatid
1516	ENSMUSG00000038619	Ensa	chr3	+	RI	Round spermatid
1517	ENSMUSG00000031161	Hdac6	chrX	-	RI	Round spermatid
1518	ENSMUSG00000022960	Donson	chr16	-	RI	Round spermatid
1519	ENSMUSG00000031783	Polr2c	chr8	+	RI	Round spermatid
1520	ENSMUSG00000042745	Id1	chr2	+	RI	Round spermatid
1521	ENSMUSG00000026553	Copa	chr1	+	RI	Round spermatid
1522	ENSMUSG00000023393	Slc17a9	chr2	+	RI	Round spermatid
1523	ENSMUSG00000026848	Tor1b	chr2	+	RI	Round spermatid
1524	ENSMUSG00000026083	Eif5b	chr1	+	RI	Round spermatid
1525	ENSMUSG00000022214	Dcaf11	chr14	+	RI	Round spermatid
1526	ENSMUSG00000027981	Rnpc3	chr3	-	RI	Round spermatid
1527	ENSMUSG00000029670	Ing3	chr6	+	RI	Round spermatid
1528	ENSMUSG00000028392	Bspry	chr4	+	RI	Round spermatid
1529	ENSMUSG00000058503	Fam133b	chr5	+	RI	Round spermatid
1530	ENSMUSG00000040459	Arglu1	chr8	-	RI	Round spermatid
1531	ENSMUSG00000022779	Top3b	chr16	+	RI	Round spermatid
1532	ENSMUSG00000021476	Habp4	chr13	+	RI	Round spermatid
1533	ENSMUSG00000037773	Pced1a	chr2	-	RI	Round spermatid
1534	ENSMUSG00000042831	Alkbh6	chr7	+	RI	Round spermatid
1535	ENSMUSG00000027185	Nat10	chr2	-	RI	Round spermatid
1536	ENSMUSG00000041921	Metap1d	chr2	+	RI	Round spermatid
1537	ENSMUSG00000038637	Lrrc56	chr7	+	RI	Round spermatid
1538	ENSMUSG00000002963	Pnkp	chr7	+	RI	Round spermatid
1539	ENSMUSG00000029472	Anapc5	chr5	-	RI	Round spermatid
1540	ENSMUSG00000062127	Cttnbp2nl	chr3	-	RI	Round spermatid
1541	ENSMUSG00000038429	Usp5	chr6	-	RI	Round spermatid
1542	ENSMUSG00000020527	Myo19	chr11	+	RI	Round spermatid
1543	ENSMUSG00000040029	Ipo8	chr6	-	RI	Round spermatid
1544	ENSMUSG00000045128	Rpl18a	chr8	-	RI	Round spermatid
1545	ENSMUSG00000039318	Rab3gap2	chr1	+	RI	Round spermatid
1546	ENSMUSG00000034126	Pomt2	chr12	-	RI	Round spermatid
1547	ENSMUSG00000062202	Btbd9	chr17	-	RI	Round spermatid
1548	ENSMUSG00000034761	Map4k5	chr12	-	RI	Round spermatid
1549	ENSMUSG00000025077	Dclre1a	chr19	-	RI	Round spermatid
1550	ENSMUSG00000039523	Cep104	chr4	+	RI	Round spermatid
1551	ENSMUSG00000016559	H3f3b	chr11	-	RI	Round spermatid
1552	ENSMUSG00000024908	Ppp6r3	chr19	-	RI	Round spermatid
1553	ENSMUSG00000026107	Nabp1	chr1	-	RI	Round spermatid
1554	ENSMUSG00000035086	Becn1	chr11	-	RI	Round spermatid
1555	ENSMUSG00000071653	1810009A15Rik	chr19	+	RI	Round spermatid
1556	ENSMUSG00000029326	Enoph1	chr5	+	RI	Round spermatid
1557	ENSMUSG00000036672	Cenpt	chr8	-	RI	Round spermatid
1558	ENSMUSG00000001065	Zfp276	chr8	+	RI	Round spermatid
1559	ENSMUSG00000028102	Pex11b	chr3	+	RI	Round spermatid
1560	ENSMUSG00000028826	Tmem57	chr4	-	RI	Round spermatid
1561	ENSMUSG00000022553	Maf1	chr15	+	RI	Round spermatid
1562	ENSMUSG00000040040	Ift88	chr14	+	RI	Round spermatid
1563	ENSMUSG00000026565	Pou2f1	chr1	-	RI	Round spermatid
1564	ENSMUSG00000037266	Rsrp1	chr4	+	RI	Round spermatid
1565	ENSMUSG00000028393	Alad	chr4	-	RI	Round spermatid
1566	ENSMUSG00000057110	Cntrl	chr2	+	RI	Round spermatid
1567	ENSMUSG00000046962	Zbtb21	chr16	-	RI	Round spermatid
1568	ENSMUSG00000026457	Adipor1	chr1	+	RI	Round spermatid
1569	ENSMUSG00000038822	Hace1	chr10	+	RI	Round spermatid
1570	ENSMUSG00000020059	Sycp3	chr10	+	RI	Round spermatid
1571	ENSMUSG00000032413	Rasa2	chr9	-	RI	Round spermatid
1572	ENSMUSG00000039686	Zer1	chr2	-	RI	Round spermatid
1573	ENSMUSG00000061046	Haghl	chr17	-	RI	Round spermatid
1574	ENSMUSG00000039449	Prpf18	chr2	-	RI	Round spermatid
1575	ENSMUSG00000027360	Hdc	chr2	-	RI	Round spermatid
1576	ENSMUSG00000020898	Ctc1	chr11	+	RI	Round spermatid
1577	ENSMUSG00000025470	Zfp511	chr7	+	RI	Round spermatid
1578	ENSMUSG00000021223	Papln	chr12	+	RI	Round spermatid
1579	ENSMUSG00000032323	Cyp11a1	chr9	+	RI	Round spermatid
1580	ENSMUSG00000004567	Mcoln1	chr8	+	RI	Round spermatid
1581	ENSMUSG00000020812	1810032O08Rik	chr11	+	RI	Round spermatid
1582	ENSMUSG00000047284	Neurl4	chr11	+	RI	Round spermatid
1583	ENSMUSG00000040356	Skiv2l	chr17	-	RI	Round spermatid
1584	ENSMUSG00000062963	Ufc1	chr1	-	RI	Round spermatid
1585	ENSMUSG00000004319	Clcn3	chr8	-	RI	Round spermatid
1586	ENSMUSG00000041096	Tspyl2	chrX	-	RI	Round spermatid
1587	ENSMUSG00000022283	Pabpc1	chr15	-	RI	Round spermatid
1588	ENSMUSG00000034432	Cops8	chr1	+	RI	Round spermatid
1589	ENSMUSG00000005566	Trim28	chr7	+	RI	Round spermatid
1590	ENSMUSG00000002486	Tchp	chr5	+	RI	Round spermatid
1591	ENSMUSG00000031939	Taf1d	chr9	+	RI	Round spermatid
1592	ENSMUSG00000028245	Nsmaf	chr4	-	RI	Round spermatid
1593	ENSMUSG00000040263	Klhdc4	chr8	-	RI	Round spermatid
1594	ENSMUSG00000043631	Ecm2	chr13	+	RI	Round spermatid
1595	ENSMUSG00000029385	Ccng2	chr5	+	RI	Round spermatid
1596	ENSMUSG00000019214	Chtf18	chr17	-	RI	Round spermatid
1597	ENSMUSG00000021282	Eif5	chr12	+	RI	Round spermatid
1598	ENSMUSG00000062908	Acadm	chr3	-	RI	Round spermatid
1599	ENSMUSG00000029068	Ccnl2	chr4	+	RI	Round spermatid
1600	ENSMUSG00000053291	Rab4b	chr7	-	RI	Round spermatid
1601	ENSMUSG00000004896	Rrnad1	chr3	-	RI	Round spermatid
1602	ENSMUSG00000027569	Mrgbp	chr2	+	RI	Round spermatid
1603	ENSMUSG00000038671	Arfrp1	chr2	-	RI	Round spermatid
1604	ENSMUSG00000006360	Crip1	chr12	+	RI	Round spermatid
1605	ENSMUSG00000015363	Trabd	chr15	+	RI	Round spermatid
1606	ENSMUSG00000040549	Ckap5	chr2	+	RI	Round spermatid
1607	ENSMUSG00000035478	Mbd3	chr10	-	RI	Round spermatid
1608	ENSMUSG00000056919	Cep162	chr9	-	RI	Round spermatid
1609	ENSMUSG00000047793	Sned1	chr1	+	RI	Round spermatid
1610	ENSMUSG00000021461	Fancc	chr13	-	RI	Round spermatid
1611	ENSMUSG00000029177	Cenpa	chr5	+	RI	Round spermatid
1612	ENSMUSG00000002981	Clptm1	chr7	-	RI	Round spermatid
1613	ENSMUSG00000018999	Slc35b4	chr6	-	RI	Round spermatid
1614	ENSMUSG00000007038	Neu1	chr17	+	RI	Round spermatid
1615	ENSMUSG00000039701	Usp53	chr3	-	RI	Round spermatid
1616	ENSMUSG00000003068	Stk11	chr10	+	RI	Round spermatid
1617	ENSMUSG00000026754	Golga1	chr2	-	RI	Round spermatid
1618	ENSMUSG00000028582	Cc2d1b	chr4	+	RI	Round spermatid
1619	ENSMUSG00000026201	Stk16	chr1	+	RI	Round spermatid
1620	ENSMUSG00000090841	Myl6	chr10	-	RI	Round spermatid
1621	ENSMUSG00000019951	Uhrf1bp1l	chr10	+	RI	Round spermatid
1622	ENSMUSG00000023902	Zscan10	chr17	+	RI	Round spermatid
1623	ENSMUSG00000020156	Mum1	chr10	+	RI	Round spermatid
1624	ENSMUSG00000003778	Brd8	chr18	-	RI	Round spermatid
1625	ENSMUSG00000026339	Ccdc93	chr1	+	RI	Round spermatid
1626	ENSMUSG00000031310	Zmym3	chrX	-	RI	Round spermatid
1627	ENSMUSG00000005682	Pan2	chr10	+	RI	Round spermatid
1628	ENSMUSG00000015697	Setdb1	chr3	-	RI	Round spermatid
1629	ENSMUSG00000037364	Srrt	chr5	-	RI	Round spermatid
1630	ENSMUSG00000036775	Decr2	chr17	-	RI	Round spermatid
1631	ENSMUSG00000028907	Utp11	chr4	-	RI	Round spermatid
1632	ENSMUSG00000036948	BC037034	chr5	-	RI	Round spermatid
1633	ENSMUSG00000023495	Pcbp4	chr9	+	RI	Round spermatid
1634	ENSMUSG00000021066	Atl1	chr12	+	RI	Round spermatid
1635	ENSMUSG00000043866	Taf10	chr7	-	RI	Round spermatid
1636	ENSMUSG00000031819	Emc8	chr8	-	RI	Round spermatid
1637	ENSMUSG00000030871	Ears2	chr7	-	RI	Round spermatid
1638	ENSMUSG00000026289	Atg16l1	chr1	+	RI	Round spermatid
1639	ENSMUSG00000020752	Recql5	chr11	-	RI	Round spermatid
1640	ENSMUSG00000028641	P3h1	chr4	+	RI	Round spermatid
1641	ENSMUSG00000026889	Rbm18	chr2	-	RI	Round spermatid
1642	ENSMUSG00000037112	Sik2	chr9	-	RI	Round spermatid
1643	ENSMUSG00000073434	Wdr90	chr17	-	RI	Round spermatid
1644	ENSMUSG00000021748	Pdhb	chr14	-	RI	Round spermatid
1645	ENSMUSG00000028678	Kif2c	chr4	-	RI	Round spermatid
1646	ENSMUSG00000003039	Fam32a	chr8	+	RI	Round spermatid
1647	ENSMUSG00000068876	Cgn	chr3	-	RI	Round spermatid
1648	ENSMUSG00000021494	Ddx41	chr13	-	RI	Round spermatid
1649	ENSMUSG00000044252	Osbpl1a	chr18	-	RI	Round spermatid
1650	ENSMUSG00000004268	Emg1	chr6	-	RI	Round spermatid
1651	ENSMUSG00000032586	Traip	chr9	+	RI	Round spermatid
1652	ENSMUSG00000053746	Ptrh1	chr2	+	RI	Round spermatid
1653	ENSMUSG00000021428	Riok1	chr13	+	RI	Round spermatid
1654	ENSMUSG00000015750	Aph1a	chr3	+	RI	Round spermatid
1655	ENSMUSG00000010608	Rbm25	chr12	+	RI	Round spermatid
1656	ENSMUSG00000040669	Phc1	chr6	-	RI	Round spermatid
1657	ENSMUSG00000025558	Dock9	chr14	-	RI	Round spermatid
1658	ENSMUSG00000004071	Cdip1	chr16	-	RI	Round spermatid
1659	ENSMUSG00000034083	Ccdc174	chr6	+	RI	Round spermatid
1660	ENSMUSG00000034518	Hmgxb4	chr8	+	RI	Round spermatid
1661	ENSMUSG00000042447	Mios	chr6	+	RI	Round spermatid
1662	ENSMUSG00000032198	Dock6	chr9	-	RI	Round spermatid
1663	ENSMUSG00000001062	Vps9d1	chr8	-	RI	Round spermatid
1664	ENSMUSG00000040506	Ambra1	chr2	+	RI	Round spermatid
1665	ENSMUSG00000037720	Tmem33	chr5	+	RI	Round spermatid
1666	ENSMUSG00000018570	2810408A11Rik	chr11	-	RI	Round spermatid
1667	ENSMUSG00000040667	Nup88	chr11	-	RI	Round spermatid
1668	ENSMUSG00000039515	Ptpa	chr2	+	RI	Round spermatid
1669	ENSMUSG00000024906	Mus81	chr19	-	RI	Round spermatid
1670	ENSMUSG00000026280	Atg4b	chr1	+	RI	Round spermatid
1671	ENSMUSG00000032126	Hmbs	chr9	-	RI	Round spermatid
1672	ENSMUSG00000026200	Glb1l	chr1	-	RI	Round spermatid
1673	ENSMUSG00000013033	Adgrl1	chr8	+	RI	Round spermatid
1674	ENSMUSG00000027371	Fahd2a	chr2	-	RI	Round spermatid
1675	ENSMUSG00000053470	Kdm3a	chr6	-	RI	Round spermatid
1676	ENSMUSG00000005625	Psmd4	chr3	-	RI	Round spermatid
1677	ENSMUSG00000025737	Wdr24	chr17	+	RI	Round spermatid
1678	ENSMUSG00000026927	Sdccag3	chr2	-	RI	Round spermatid
1679	ENSMUSG00000029363	Rfc5	chr5	-	RI	Round spermatid
1680	ENSMUSG00000025410	Dctn2	chr10	+	RI	Round spermatid
1681	ENSMUSG00000025137	Pcyt2	chr11	-	RI	Round spermatid
1682	ENSMUSG00000061028	Clasrp	chr7	-	RI	Round spermatid
1683	ENSMUSG00000006498	Ptbp1	chr10	+	RI	Round spermatid
1684	ENSMUSG00000028086	Fbxw7	chr3	+	RI	Round spermatid
1685	ENSMUSG00000019338	Zfp687	chr3	-	RI	Round spermatid
1686	ENSMUSG00000022552	Sharpin	chr15	-	RI	Round spermatid
1687	ENSMUSG00000029103	Lrpap1	chr5	-	RI	Round spermatid
1688	ENSMUSG00000036862	Dchs1	chr7	-	RI	Round spermatid
1689	ENSMUSG00000025982	Sf3b1	chr1	-	RI	Round spermatid
1690	ENSMUSG00000018433	Nol11	chr11	-	RI	Round spermatid
1691	ENSMUSG00000042390	Gatad2b	chr3	+	RI	Round spermatid
1692	ENSMUSG00000002058	Unc119	chr11	+	RI	Round spermatid
1693	ENSMUSG00000037376	Trmt6	chr2	-	RI	Round spermatid
1694	ENSMUSG00000032185	Carm1	chr9	+	RI	Round spermatid
1695	ENSMUSG00000023960	Enpp5	chr17	+	RI	Round spermatid
1696	ENSMUSG00000022710	Usp7	chr16	-	RI	Round spermatid
1697	ENSMUSG00000041438	Utp4	chr8	+	RI	Round spermatid
1698	ENSMUSG00000026309	Ilkap	chr1	-	RI	Round spermatid
1699	ENSMUSG00000025766	D3Ertd751e	chr3	+	RI	Round spermatid
1700	ENSMUSG00000038644	Pold1	chr7	-	RI	Round spermatid
1701	ENSMUSG00000006736	Tspan31	chr10	-	RI	Round spermatid
1702	ENSMUSG00000029267	Mtf2	chr5	+	RI	Round spermatid
1703	ENSMUSG00000038538	Ubn2	chr6	+	RI	Round spermatid
1704	ENSMUSG00000071337	Tia1	chr6	+	RI	Round spermatid
1705	ENSMUSG00000002395	Use1	chr8	+	RI	Round spermatid
1706	ENSMUSG00000028975	Pex14	chr4	-	RI	Round spermatid
1707	ENSMUSG00000068735	Trp53i11	chr2	+	RI	Round spermatid
1708	ENSMUSG00000036046	5031439G07Rik	chr15	-	RI	Round spermatid
1709	ENSMUSG00000019738	Polr2i	chr7	+	RI	Round spermatid
1710	ENSMUSG00000020608	Smc6	chr12	+	RI	Round spermatid
1711	ENSMUSG00000001627	Ifrd1	chr12	-	RI	Round spermatid
1712	ENSMUSG00000029775	Klhdc10	chr6	+	RI	Round spermatid
1713	ENSMUSG00000029782	Tmem209	chr6	-	RI	Round spermatid
1714	ENSMUSG00000017754	Pltp	chr2	-	RI	Round spermatid
1715	ENSMUSG00000030512	Snrpa1	chr7	+	RI	Round spermatid
1716	ENSMUSG00000025159	Mms19	chr19	-	RI	Round spermatid
1717	ENSMUSG00000047617	Paxx	chr2	-	RI	Round spermatid
1718	ENSMUSG00000017221	Psmd3	chr11	+	RI	Round spermatid
1719	ENSMUSG00000001962	Fam50a	chrX	+	RI	Round spermatid
1720	ENSMUSG00000004264	Phb2	chr6	+	RI	Round spermatid
1721	ENSMUSG00000038975	Rabggtb	chr3	-	RI	Round spermatid
1722	ENSMUSG00000030689	Ino80e	chr7	-	RI	Round spermatid
1723	ENSMUSG00000030890	Ilk	chr7	+	RI	Round spermatid
1724	ENSMUSG00000026577	Blzf1	chr1	-	RI	Round spermatid
1725	ENSMUSG00000114797	Nupl1	chr14	-	RI	Round spermatid
1726	ENSMUSG00000028759	Hp1bp3	chr4	+	RI	Round spermatid
1727	ENSMUSG00000020708	Psmc5	chr11	+	RI	Round spermatid
1728	ENSMUSG00000035228	Ccdc106	chr7	+	RI	Round spermatid
1729	ENSMUSG00000026791	Slc2a8	chr2	-	RI	Round spermatid
1730	ENSMUSG00000041375	Ccdc9	chr7	-	RI	Round spermatid
1731	ENSMUSG00000021819	Zswim8	chr14	+	RI	Round spermatid
1732	ENSMUSG00000039356	Exosc2	chr2	+	RI	Round spermatid
1733	ENSMUSG00000035325	Sec31a	chr5	-	RI	Round spermatid
1734	ENSMUSG00000002107	Celf2	chr2	-	RI	Round spermatid
1735	ENSMUSG00000020250	Txnrd1	chr10	+	RI	Round spermatid
1736	ENSMUSG00000049643	2310022A10Rik	chr7	+	RI	Round spermatid
1737	ENSMUSG00000022322	Shcbp1	chr8	-	RI	Round spermatid
1738	ENSMUSG00000039263	Npepl1	chr2	+	RI	Round spermatid
1739	ENSMUSG00000027465	Tbc1d20	chr2	+	RI	Round spermatid
1740	ENSMUSG00000028954	Nub1	chr5	+	RI	Round spermatid
1741	ENSMUSG00000017119	Nbr1	chr11	+	RI	Round spermatid
1742	ENSMUSG00000022681	Ntan1	chr16	+	RI	Round spermatid
1743	ENSMUSG00000033105	Lss	chr10	+	RI	Round spermatid
1744	ENSMUSG00000020463	Ppp4r3b	chr11	+	RI	Round spermatid
1745	ENSMUSG00000021661	Ankra2	chr13	+	RI	Round spermatid
1746	ENSMUSG00000053453	Thoc7	chr14	-	RI	Round spermatid
1747	ENSMUSG00000028693	Nasp	chr4	-	RI	Round spermatid
1748	ENSMUSG00000007458	M6pr	chr6	+	RI	Round spermatid
1749	ENSMUSG00000025731	Mettl26	chr17	+	RI	Round spermatid
1750	ENSMUSG00000033295	Ptprf	chr4	-	RI	Round spermatid
1751	ENSMUSG00000002804	Nudt14	chr12	-	RI	Round spermatid
1752	ENSMUSG00000023262	Acy1	chr9	-	RI	Round spermatid
1753	ENSMUSG00000036819	Jmjd4	chr11	+	RI	Round spermatid
1754	ENSMUSG00000068329	Htra2	chr6	-	RI	Round spermatid
1755	ENSMUSG00000000902	Smarcb1	chr10	-	RI	Round spermatid
1756	ENSMUSG00000029060	Mib2	chr4	-	RI	Round spermatid
1757	ENSMUSG00000030846	Tial1	chr7	-	RI	Round spermatid
1758	ENSMUSG00000046032	Snx12	chrX	-	RI	Round spermatid
1759	ENSMUSG00000029291	Rufy3	chr5	+	RI	Round spermatid
1760	ENSMUSG00000028114	Mettl14	chr3	-	RI	Round spermatid
1761	ENSMUSG00000030180	Kdm5a	chr6	+	RI	Round spermatid
1762	ENSMUSG00000019139	Isyna1	chr8	+	RI	Round spermatid
1763	ENSMUSG00000030763	Lcmt1	chr7	+	RI	Round spermatid
1764	ENSMUSG00000030979	Uros	chr7	-	RI	Round spermatid
1765	ENSMUSG00000021235	Coq6	chr12	+	RI	Round spermatid
1766	ENSMUSG00000001909	Trmt1	chr8	+	RI	Round spermatid
1767	ENSMUSG00000052133	Sema5b	chr16	+	RI	Round spermatid
1768	ENSMUSG00000028552	Eps15	chr4	+	RI	Round spermatid
1769	ENSMUSG00000032178	Ilf3	chr9	+	RI	Round spermatid
1770	ENSMUSG00000031835	Mbtps1	chr8	-	RI	Round spermatid
1771	ENSMUSG00000005299	Letm1	chr5	-	RI	Round spermatid
1772	ENSMUSG00000024843	Chka	chr19	+	RI	Round spermatid
1773	ENSMUSG00000073795	6430531B16Rik	chr7	-	RI	Round spermatid
1774	ENSMUSG00000020362	Cnot6	chr11	-	RI	Round spermatid
1775	ENSMUSG00000034908	Sidt2	chr9	-	RI	Round spermatid
1776	ENSMUSG00000004394	Tmed4	chr11	-	RI	Round spermatid
1777	ENSMUSG00000024858	Grk2	chr19	-	RI	Round spermatid
1778	ENSMUSG00000025060	Slk	chr19	+	RI	Round spermatid
1779	ENSMUSG00000029386	Tctn2	chr5	+	RI	Round spermatid
1780	ENSMUSG00000020640	Itsn2	chr12	+	RI	Round spermatid
1781	ENSMUSG00000029730	Mcm7	chr5	-	RI	Round spermatid
1782	ENSMUSG00000038346	Zfp384	chr6	+	RI	Round spermatid
1783	ENSMUSG00000035969	Rusc2	chr4	+	RI	Round spermatid
1784	ENSMUSG00000030058	Copg1	chr6	+	RI	Round spermatid
1785	ENSMUSG00000028467	Gba2	chr4	-	RI	Round spermatid
1786	ENSMUSG00000027639	Samhd1	chr2	-	RI	Round spermatid
1787	ENSMUSG00000031532	Saraf	chr8	+	RI	Round spermatid
1788	ENSMUSG00000030824	Nucb1	chr7	-	RI	Round spermatid
1789	ENSMUSG00000018068	Ints2	chr11	-	RI	Round spermatid
1790	ENSMUSG00000031878	Nae1	chr8	-	RI	Round spermatid
1791	ENSMUSG00000016921	Srsf6	chr2	+	RI	Round spermatid
1792	ENSMUSG00000021893	Capn7	chr14	+	RI	Round spermatid
1793	ENSMUSG00000004100	Ppan	chr9	+	RI	Round spermatid
1794	ENSMUSG00000090862	Rps13	chr7	-	RI	Round spermatid
1795	ENSMUSG00000028469	Npr2	chr4	+	RI	Round spermatid
1796	ENSMUSG00000041945	Mfsd9	chr1	-	RI	Round spermatid
1797	ENSMUSG00000025962	Fastkd2	chr1	+	RI	Round spermatid
1798	ENSMUSG00000038084	Opa1	chr16	+	RI	Round spermatid
1799	ENSMUSG00000031711	Zfp330	chr8	-	RI	Round spermatid
1800	ENSMUSG00000024048	Myl12a	chr17	-	RI	Round spermatid
1801	ENSMUSG00000026672	Optn	chr2	-	RI	Round spermatid
1802	ENSMUSG00000064061	Dzip3	chr16	-	RI	Round spermatid
1803	ENSMUSG00000021701	Plk2	chr13	+	RI	Round spermatid
1804	ENSMUSG00000057193	Slc44a2	chr9	+	RI	Round spermatid
1805	ENSMUSG00000032567	Aste1	chr9	+	RI	Round spermatid
1806	ENSMUSG00000022035	Ccdc25	chr14	+	RI	Round spermatid
1807	ENSMUSG00000030057	Cnbp	chr6	-	RI	Round spermatid
1808	ENSMUSG00000017210	Med24	chr11	-	RI	Round spermatid
1809	ENSMUSG00000040482	Dxo	chr17	+	RI	Round spermatid
1810	ENSMUSG00000004891	Nes	chr3	+	RI	Round spermatid
1811	ENSMUSG00000018287	Spag7	chr11	-	RI	Round spermatid
1812	ENSMUSG00000036606	Plxnb2	chr15	-	RI	Round spermatid
1813	ENSMUSG00000026269	Rnpepl1	chr1	+	RI	Round spermatid
1814	ENSMUSG00000005774	Rfx5	chr3	+	RI	Round spermatid
1815	ENSMUSG00000066979	Bub3	chr7	+	RI	Round spermatid
1816	ENSMUSG00000024913	Lrp5	chr19	-	RI	Round spermatid
1817	ENSMUSG00000037552	Plekhg2	chr7	-	RI	Round spermatid
1818	ENSMUSG00000005881	Ergic3	chr2	+	RI	Round spermatid
1819	ENSMUSG00000003360	Ddx23	chr15	-	RI	Round spermatid
1820	ENSMUSG00000034928	Rnf44	chr13	-	RI	Round spermatid
1821	ENSMUSG00000032786	Alas1	chr9	-	RI	Round spermatid
1822	ENSMUSG00000031641	Cbr4	chr8	+	RI	Round spermatid
1823	ENSMUSG00000019470	Xab2	chr8	-	RI	Round spermatid
1824	ENSMUSG00000028973	Abcb8	chr5	+	RI	Round spermatid
1825	ENSMUSG00000023764	Sfi1	chr11	-	RI	Round spermatid
1826	ENSMUSG00000032477	Cdc25a	chr9	+	RI	Round spermatid
1827	ENSMUSG00000060671	Atp8b2	chr3	-	RI	Round spermatid
1828	ENSMUSG00000024160	Spsb3	chr17	+	RI	Round spermatid
1829	ENSMUSG00000035953	Tmem55b	chr14	-	RI	Round spermatid
1830	ENSMUSG00000025155	Dus1l	chr11	-	RI	Round spermatid
1831	ENSMUSG00000035206	Sppl2b	chr10	+	RI	Round spermatid
1832	ENSMUSG00000036928	Stag3	chr5	+	RI	Round spermatid
1833	ENSMUSG00000057738	Sptan1	chr2	+	RI	Round spermatid
1834	ENSMUSG00000032480	Dhx30	chr9	-	RI	Round spermatid
1835	ENSMUSG00000093445	Lrch4	chr5	+	RI	Round spermatid
1836	ENSMUSG00000002055	Spag5	chr11	+	RI	Round spermatid
1837	ENSMUSG00000024911	Fibp	chr19	+	RI	Round spermatid
1838	ENSMUSG00000026999	Nup35	chr2	+	RI	Round spermatid
1839	ENSMUSG00000031812	Map1lc3b	chr8	+	RI	Round spermatid
1840	ENSMUSG00000038564	Ift172	chr5	-	RI	Round spermatid
1841	ENSMUSG00000049659	Aftph	chr11	-	RI	Round spermatid
1842	ENSMUSG00000026869	Psmd5	chr2	-	RI	Round spermatid
1843	ENSMUSG00000024542	Cep192	chr18	+	RI	Round spermatid
1844	ENSMUSG00000026409	Pfkfb2	chr1	-	RI	Round spermatid
1845	ENSMUSG00000002820	Atg4d	chr9	+	RI	Round spermatid
1846	ENSMUSG00000041264	Uspl1	chr5	+	RI	Round spermatid
1847	ENSMUSG00000027677	Ttc14	chr3	+	RI	Round spermatid
1848	ENSMUSG00000027284	Cdan1	chr2	-	RI	Round spermatid
1849	ENSMUSG00000029148	Nrbp1	chr5	+	RI	Round spermatid
1850	ENSMUSG00000042726	Trafd1	chr5	-	RI	Round spermatid
1851	ENSMUSG00000020745	Pafah1b1	chr11	-	RI	Round spermatid
1852	ENSMUSG00000031729	Ist1	chr8	-	RI	Round spermatid
1853	ENSMUSG00000032913	Lrig2	chr3	-	RI	Round spermatid
1854	ENSMUSG00000029017	Pmpcb	chr5	+	RI	Round spermatid
1855	ENSMUSG00000030929	Eri2	chr7	-	RI	Round spermatid
1856	ENSMUSG00000027804	Ppid	chr3	+	RI	Round spermatid
1857	ENSMUSG00000042594	Sh2b3	chr5	-	RI	Round spermatid
1858	ENSMUSG00000031386	Hcfc1	chrX	-	RI	Round spermatid
1859	ENSMUSG00000020234	4930404N11Rik	chr10	-	RI	Round spermatid
1860	ENSMUSG00000009621	Vav2	chr2	-	RI	Round spermatid
1861	ENSMUSG00000038900	Rpl12	chr2	+	RI	Round spermatid
1862	ENSMUSG00000013858	Tmem259	chr10	-	RI	Round spermatid
1863	ENSMUSG00000020706	Ftsj3	chr11	-	RI	Round spermatid
1864	ENSMUSG00000042303	Sgsm3	chr15	+	RI	Round spermatid
1865	ENSMUSG00000078485	Plekhn1	chr4	-	RI	Round spermatid
1866	ENSMUSG00000030216	Wbp11	chr6	-	RI	Round spermatid
1867	ENSMUSG00000031816	Mthfsd	chr8	-	RI	Round spermatid
1868	ENSMUSG00000060073	Psma3	chr12	+	RI	Round spermatid
1869	ENSMUSG00000026121	Sema4c	chr1	-	RI	Round spermatid
1870	ENSMUSG00000055692	Tmem191c	chr16	+	RI	Round spermatid
1871	ENSMUSG00000025473	Adam8	chr7	-	RI	Round spermatid
1872	ENSMUSG00000029003	Mad2l2	chr4	+	RI	Round spermatid
1873	ENSMUSG00000022394	L3mbtl2	chr15	+	RI	Round spermatid
1874	ENSMUSG00000014075	Tctex1d2	chr16	+	RI	Round spermatid
1875	ENSMUSG00000032525	Nktr	chr9	+	RI	Round spermatid
1876	ENSMUSG00000029033	Acap3	chr4	+	RI	Round spermatid
1877	ENSMUSG00000024454	Hdac3	chr18	-	RI	Round spermatid
1878	ENSMUSG00000042272	Sestd1	chr2	-	RI	Round spermatid
1879	ENSMUSG00000033799	Fam208b	chr13	-	RI	Round spermatid
1880	ENSMUSG00000024914	Drap1	chr19	-	RI	Round spermatid
1881	ENSMUSG00000010110	Stx5a	chr19	+	RI	Round spermatid
1882	ENSMUSG00000033416	Gucd1	chr10	-	RI	Round spermatid
1883	ENSMUSG00000026199	Ankzf1	chr1	+	RI	Round spermatid
1884	ENSMUSG00000029599	Ddx54	chr5	+	RI	Round spermatid
1885	ENSMUSG00000031342	Gpm6b	chrX	+	RI	Round spermatid
1886	ENSMUSG00000040532	Abhd11	chr5	+	RI	Round spermatid
1887	ENSMUSG00000026211	Obsl1	chr1	-	RI	Round spermatid
1888	ENSMUSG00000035024	Ncapd3	chr9	+	RI	Round spermatid
1889	ENSMUSG00000029661	Col1a2	chr6	+	RI	Round spermatid
1890	ENSMUSG00000062175	Tgif2	chr2	+	RI	Round spermatid
1891	ENSMUSG00000063659	Zbtb18	chr1	+	RI	Round spermatid
1892	ENSMUSG00000036452	Arhgap26	chr18	+	RI	Round spermatid
1893	ENSMUSG00000019467	Arhgef25	chr10	-	RI	Round spermatid
1894	ENSMUSG00000035890	Rnf126	chr10	-	RI	Round spermatid
1895	ENSMUSG00000041361	Myzap	chr9	-	RI	Round spermatid
1896	ENSMUSG00000029617	Ccz1	chr5	-	RI	Round spermatid
1897	ENSMUSG00000028089	Chd1l	chr3	-	RI	Round spermatid
1898	ENSMUSG00000002014	Ssr4	chrX	+	RI	Round spermatid
1899	ENSMUSG00000034610	Zcchc11	chr4	+	RI	Round spermatid
1900	ENSMUSG00000020307	Cdc34	chr10	+	RI	Round spermatid
1901	ENSMUSG00000028410	Dnaja1	chr4	+	RI	Round spermatid
1902	ENSMUSG00000034994	Eef2	chr10	+	RI	Round spermatid
1903	ENSMUSG00000020260	Pofut2	chr10	+	RI	Round spermatid
1904	ENSMUSG00000034006	Pqlc1	chr18	+	RI	Round spermatid
1905	ENSMUSG00000029012	Orc5	chr5	-	RI	Round spermatid
1906	ENSMUSG00000027263	Tubgcp4	chr2	+	RI	Round spermatid
1907	ENSMUSG00000039244	E130309D02Rik	chr5	-	RI	Round spermatid
1908	ENSMUSG00000003345	Csnk1g2	chr10	+	RI	Round spermatid
1909	ENSMUSG00000029071	Dvl1	chr4	+	RI	Round spermatid
1910	ENSMUSG00000048495	Tyw5	chr1	-	RI	Round spermatid
1911	ENSMUSG00000046671	Mtfr1l	chr4	-	RI	Round spermatid
1912	ENSMUSG00000029062	Cdk11b	chr4	+	RI	Round spermatid
1913	ENSMUSG00000073422	H2-Ke6	chr17	-	RI	Round spermatid
1914	ENSMUSG00000034101	Ctnnd1	chr2	-	RI	Round spermatid
1915	ENSMUSG00000036555	Iqce	chr5	-	RI	Round spermatid
1916	ENSMUSG00000019518	Ap4m1	chr5	+	RI	Round spermatid
1917	ENSMUSG00000031918	Mtmr2	chr9	+	RI	Round spermatid
1918	ENSMUSG00000063884	Ptcd3	chr6	-	RI	Round spermatid
1919	ENSMUSG00000038241	Cep250	chr2	+	RI	Round spermatid
1920	ENSMUSG00000025583	Rptor	chr11	+	RI	Round spermatid
1921	ENSMUSG00000023153	Tmem52	chr4	+	RI	Round spermatid
1922	ENSMUSG00000064307	Lrrc51	chr7	-	RI	Round spermatid
1923	ENSMUSG00000031583	Wrn	chr8	-	RI	Round spermatid
1924	ENSMUSG00000044433	Camsap3	chr8	+	RI	Round spermatid
1925	ENSMUSG00000004642	Slbp	chr5	-	RI	Round spermatid
1926	ENSMUSG00000002948	Map2k7	chr8	+	RI	Round spermatid
1927	ENSMUSG00000042055	Wdr11	chr7	+	RI	Round spermatid
1928	ENSMUSG00000030409	Dmpk	chr7	+	RI	Round spermatid
1929	ENSMUSG00000034059	Ypel4	chr2	+	RI	Round spermatid
1930	ENSMUSG00000040688	Tbl3	chr17	-	RI	Round spermatid
1931	ENSMUSG00000041747	Utp15	chr13	-	RI	Round spermatid
1932	ENSMUSG00000046111	Cep295	chr9	-	RI	Round spermatid
1933	ENSMUSG00000025571	Tnrc6c	chr11	+	RI	Round spermatid
1934	ENSMUSG00000005150	Wdr83	chr8	-	RI	Round spermatid
1935	ENSMUSG00000041263	Rusc1	chr3	-	RI	Round spermatid
1936	ENSMUSG00000039660	Spout1	chr2	-	RI	Round spermatid
1937	ENSMUSG00000062906	Hdac10	chr15	-	RI	Round spermatid
1938	ENSMUSG00000028959	Fastk	chr5	-	RI	Round spermatid
1939	ENSMUSG00000053332	Gas5	chr1	+	RI	Round spermatid
1940	ENSMUSG00000001305	Rrp15	chr1	-	RI	Round spermatid
1941	ENSMUSG00000080316	Spaca6	chr17	+	RI	Round spermatid
1942	ENSMUSG00000002825	Qtrt1	chr9	+	RI	Round spermatid
1943	ENSMUSG00000035919	Bbs9	chr9	+	RI	Round spermatid
1944	ENSMUSG00000035798	Zdhhc17	chr10	-	RI	Round spermatid
1945	ENSMUSG00000051811	Cox6b2	chr7	-	RI	Round spermatid
1946	ENSMUSG00000019996	Map7	chr10	+	RI	Round spermatid
1947	ENSMUSG00000028456	Unc13b	chr4	+	RI	Round spermatid
1948	ENSMUSG00000024426	Atat1	chr17	-	RI	Round spermatid
1949	ENSMUSG00000039994	Timeless	chr10	+	RI	Round spermatid
1950	ENSMUSG00000025369	Smarcc2	chr10	+	RI	Round spermatid
1951	ENSMUSG00000039536	Stau1	chr2	-	RI	Round spermatid
1952	ENSMUSG00000031634	Ufsp2	chr8	+	RI	Round spermatid
1953	ENSMUSG00000020329	Polrmt	chr10	-	RI	Round spermatid
1954	ENSMUSG00000036202	Rif1	chr2	+	RI	Round spermatid
1955	ENSMUSG00000035545	Leng8	chr7	+	RI	Round spermatid
1956	ENSMUSG00000039205	Ciz1	chr2	+	RI	Round spermatid
1957	ENSMUSG00000031652	N4bp1	chr8	-	RI	Round spermatid
1958	ENSMUSG00000057335	Cep170	chr1	-	RI	Round spermatid
1959	ENSMUSG00000022621	Rabl2	chr15	-	RI	Round spermatid
1960	ENSMUSG00000032180	Tmed1	chr9	-	RI	Round spermatid
1961	ENSMUSG00000062867	Impdh2	chr9	+	RI	Round spermatid
1962	ENSMUSG00000009640	Dmap1	chr4	-	RI	Round spermatid
1963	ENSMUSG00000048930	Tada3	chr6	-	RI	Round spermatid
1964	ENSMUSG00000021820	Camk2g	chr14	-	RI	Round spermatid
1965	ENSMUSG00000030138	Bms1	chr6	-	RI	Round spermatid
1966	ENSMUSG00000073468	Sft2d1	chr17	+	RI	Round spermatid
1967	ENSMUSG00000042606	Hirip3	chr7	+	RI	Round spermatid
1968	ENSMUSG00000029625	Cpsf4	chr5	+	RI	Round spermatid
1969	ENSMUSG00000032590	Apeh	chr9	-	RI	Round spermatid
1970	ENSMUSG00000044595	Dnd1	chr18	-	RI	Round spermatid
1971	ENSMUSG00000014418	Hps5	chr7	-	RI	Round spermatid
1972	ENSMUSG00000005262	Ufd1	chr16	+	RI	Round spermatid
1973	ENSMUSG00000028689	Ccdc163	chr4	+	RI	Round spermatid
1974	ENSMUSG00000030822	Prr14	chr7	+	RI	Round spermatid
1975	ENSMUSG00000030330	Ing4	chr6	+	RI	Round spermatid
1976	ENSMUSG00000057649	Brd9	chr13	+	RI	Round spermatid
1977	ENSMUSG00000059208	Hnrnpm	chr17	-	RI	Round spermatid
1978	ENSMUSG00000029089	5730480H06Rik	chr5	+	RI	Round spermatid
1979	ENSMUSG00000033364	Usp37	chr1	-	RI	Round spermatid
1980	ENSMUSG00000053964	Lgals4	chr7	+	RI	Round spermatid
1981	ENSMUSG00000032280	Tle3	chr9	+	RI	Round spermatid
1982	ENSMUSG00000021012	Zc3h14	chr12	+	RI	Round spermatid
1983	ENSMUSG00000003031	Cdkn1b	chr6	+	RI	Round spermatid
1984	ENSMUSG00000006299	Aamp	chr1	-	RI	Round spermatid
1985	ENSMUSG00000054405	Dnajc8	chr4	+	RI	Round spermatid
1986	ENSMUSG00000032579	Hemk1	chr9	-	RI	Round spermatid
1987	ENSMUSG00000059796	Eif4a1	chr11	-	RI	Round spermatid
1988	ENSMUSG00000056211	R3hdm1	chr1	+	RI	Round spermatid
1989	ENSMUSG00000025280	Polr3a	chr14	-	RI	Round spermatid
1990	ENSMUSG00000027374	Mrps5	chr2	+	RI	Round spermatid
1991	ENSMUSG00000020263	Appl2	chr10	-	RI	Round spermatid
1992	ENSMUSG00000034729	Mrps10	chr17	+	RI	Round spermatid
1993	ENSMUSG00000034789	Rab24	chr13	-	RI	Round spermatid
1994	ENSMUSG00000074247	Dda1	chr8	+	RI	Round spermatid
1995	ENSMUSG00000024695	Zfp91	chr19	-	RI	Round spermatid
1996	ENSMUSG00000099083	Atf7	chr15	-	RI	Round spermatid
1997	ENSMUSG00000027669	Gnb4	chr3	-	RI	Round spermatid
1998	ENSMUSG00000029029	Wrap73	chr4	+	RI	Round spermatid
[truncated: 2,355 more rows]

## Sheet: Spermatid
ID	GeneID	geneSymbol	chr	strand	Alternative splicing type	Development stage
0	ENSMUSG00000028464	Tpm2	chr4	-	A3SS	Spermatid
1	ENSMUSG00000022838	Eaf2	chr16	-	A3SS	Spermatid
2	ENSMUSG00000066026	Dhrs3	chr4	+	A3SS	Spermatid
3	ENSMUSG00000020196	Cabin1	chr10	-	A3SS	Spermatid
4	ENSMUSG00000042396	Rbm7	chr9	-	A3SS	Spermatid
5	ENSMUSG00000079334	Nat6	chr9	+	A3SS	Spermatid
6	ENSMUSG00000020486	Sept4	chr11	+	A3SS	Spermatid
7	ENSMUSG00000032580	Rbm5	chr9	-	A3SS	Spermatid
8	ENSMUSG00000004393	Ddx56	chr11	-	A3SS	Spermatid
9	ENSMUSG00000028741	Mrto4	chr4	-	A3SS	Spermatid
10	ENSMUSG00000036529	Sbf1	chr15	-	A3SS	Spermatid
11	ENSMUSG00000027206	Cops2	chr2	-	A3SS	Spermatid
12	ENSMUSG00000026159	Agfg1	chr1	+	A3SS	Spermatid
13	ENSMUSG00000020740	Gga3	chr11	-	A3SS	Spermatid
14	ENSMUSG00000028447	Dctn3	chr4	-	A3SS	Spermatid
15	ENSMUSG00000070733	Fryl	chr5	-	A3SS	Spermatid
16	ENSMUSG00000032366	Tpm1	chr9	-	A3SS	Spermatid
17	ENSMUSG00000033382	Trappc8	chr18	-	A3SS	Spermatid
18	ENSMUSG00000033365	Ipo13	chr4	-	A3SS	Spermatid
19	ENSMUSG00000053877	Srcap	chr7	+	A3SS	Spermatid
20	ENSMUSG00000033060	Lmo7	chr14	+	A3SS	Spermatid
21	ENSMUSG00000030374	Strn4	chr7	+	A3SS	Spermatid
22	ENSMUSG00000041459	Tardbp	chr4	-	A3SS	Spermatid
23	ENSMUSG00000034973	Dopey1	chr9	+	A3SS	Spermatid
24	ENSMUSG00000040410	Fbxl4	chr4	+	A3SS	Spermatid
25	ENSMUSG00000068922	Msto1	chr3	-	A3SS	Spermatid
26	ENSMUSG00000032363	Adamts7	chr9	+	A3SS	Spermatid
27	ENSMUSG00000026083	Eif5b	chr1	+	A3SS	Spermatid
28	ENSMUSG00000000339	Rtca	chr3	-	A3SS	Spermatid
29	ENSMUSG00000015869	Prpsap1	chr11	-	A3SS	Spermatid
30	ENSMUSG00000023345	Poc1a	chr9	+	A3SS	Spermatid
31	ENSMUSG00000028392	Bspry	chr4	+	A3SS	Spermatid
32	ENSMUSG00000020198	Ap3d1	chr10	-	A3SS	Spermatid
33	ENSMUSG00000045409	Trim39	chr17	-	A3SS	Spermatid
34	ENSMUSG00000030067	Foxp1	chr6	-	A3SS	Spermatid
35	ENSMUSG00000063889	Crem	chr18	-	A3SS	Spermatid
36	ENSMUSG00000032340	Neo1	chr9	-	A3SS	Spermatid
37	ENSMUSG00000034160	Ogt	chrX	+	A3SS	Spermatid
38	ENSMUSG00000022185	Acin1	chr14	-	A3SS	Spermatid
39	ENSMUSG00000042831	Alkbh6	chr7	+	A3SS	Spermatid
40	ENSMUSG00000034544	Rsrc1	chr3	+	A3SS	Spermatid
41	ENSMUSG00000098789	Jmjd7	chr2	+	A3SS	Spermatid
42	ENSMUSG00000002963	Pnkp	chr7	+	A3SS	Spermatid
43	ENSMUSG00000025607	Copg2	chr6	-	A3SS	Spermatid
44	ENSMUSG00000029472	Anapc5	chr5	-	A3SS	Spermatid
45	ENSMUSG00000062127	Cttnbp2nl	chr3	-	A3SS	Spermatid
46	ENSMUSG00000045983	Eif4g1	chr16	+	A3SS	Spermatid
47	ENSMUSG00000020366	Mapk9	chr11	+	A3SS	Spermatid
48	ENSMUSG00000034126	Pomt2	chr12	-	A3SS	Spermatid
49	ENSMUSG00000024908	Ppp6r3	chr19	-	A3SS	Spermatid
50	ENSMUSG00000032637	Atxn2l	chr7	-	A3SS	Spermatid
51	ENSMUSG00000001065	Zfp276	chr8	+	A3SS	Spermatid
52	ENSMUSG00000039738	Slx4	chr16	-	A3SS	Spermatid
53	ENSMUSG00000045078	Rnf216	chr5	-	A3SS	Spermatid
54	ENSMUSG00000058135	Gstm1	chr3	-	A3SS	Spermatid
55	ENSMUSG00000037266	Rsrp1	chr4	+	A3SS	Spermatid
56	ENSMUSG00000039656	Rxrb	chr17	+	A3SS	Spermatid
57	ENSMUSG00000044320	1700001O22Rik	chr2	-	A3SS	Spermatid
58	ENSMUSG00000047412	Zbtb44	chr9	+	A3SS	Spermatid
59	ENSMUSG00000039449	Prpf18	chr2	-	A3SS	Spermatid
60	ENSMUSG00000008682	Rpl10	chrX	+	A3SS	Spermatid
61	ENSMUSG00000052331	Ankrd44	chr1	-	A3SS	Spermatid
62	ENSMUSG00000020952	Scfd1	chr12	+	A3SS	Spermatid
63	ENSMUSG00000040356	Skiv2l	chr17	-	A3SS	Spermatid
64	ENSMUSG00000063849	Ppcdc	chr9	-	A3SS	Spermatid
65	ENSMUSG00000029068	Ccnl2	chr4	+	A3SS	Spermatid
66	ENSMUSG00000062822	4833420G17Rik	chr13	+	A3SS	Spermatid
67	ENSMUSG00000029534	St7	chr6	+	A3SS	Spermatid
68	ENSMUSG00000023942	Slc29a1	chr17	-	A3SS	Spermatid
69	ENSMUSG00000026466	Tor1aip1	chr1	-	A3SS	Spermatid
70	ENSMUSG00000027569	Mrgbp	chr2	+	A3SS	Spermatid
71	ENSMUSG00000038671	Arfrp1	chr2	-	A3SS	Spermatid
72	ENSMUSG00000019977	Hbs1l	chr10	+	A3SS	Spermatid
73	ENSMUSG00000035478	Mbd3	chr10	-	A3SS	Spermatid
74	ENSMUSG00000047793	Sned1	chr1	+	A3SS	Spermatid
75	ENSMUSG00000032815	Fanca	chr8	-	A3SS	Spermatid
76	ENSMUSG00000027751	Supt20	chr3	+	A3SS	Spermatid
77	ENSMUSG00000003068	Stk11	chr10	+	A3SS	Spermatid
78	ENSMUSG00000040563	Plppr2	chr9	+	A3SS	Spermatid
79	ENSMUSG00000028582	Cc2d1b	chr4	+	A3SS	Spermatid
80	ENSMUSG00000026082	Rev1	chr1	-	A3SS	Spermatid
81	ENSMUSG00000090841	Myl6	chr10	-	A3SS	Spermatid
82	ENSMUSG00000028049	Scamp3	chr3	+	A3SS	Spermatid
83	ENSMUSG00000022119	Rbm26	chr14	-	A3SS	Spermatid
84	ENSMUSG00000031715	Smarca5	chr8	-	A3SS	Spermatid
85	ENSMUSG00000031310	Zmym3	chrX	-	A3SS	Spermatid
86	ENSMUSG00000074165	Zfp788	chr7	+	A3SS	Spermatid
87	ENSMUSG00000005682	Pan2	chr10	+	A3SS	Spermatid
88	ENSMUSG00000037364	Srrt	chr5	-	A3SS	Spermatid
89	ENSMUSG00000022678	Nde1	chr16	+	A3SS	Spermatid
90	ENSMUSG00000028256	Odf2l	chr3	+	A3SS	Spermatid
91	ENSMUSG00000007837	Prrg2	chr7	-	A3SS	Spermatid
92	ENSMUSG00000062743	Zfp677	chr17	+	A3SS	Spermatid
93	ENSMUSG00000036948	BC037034	chr5	-	A3SS	Spermatid
94	ENSMUSG00000026155	Smap1	chr1	-	A3SS	Spermatid
95	ENSMUSG00000026584	Scyl3	chr1	+	A3SS	Spermatid
96	ENSMUSG00000001376	Vps50	chr6	+	A3SS	Spermatid
97	ENSMUSG00000018474	Chd3	chr11	-	A3SS	Spermatid
98	ENSMUSG00000028484	Psip1	chr4	-	A3SS	Spermatid
99	ENSMUSG00000025648	Pfkfb4	chr9	+	A3SS	Spermatid
100	ENSMUSG00000029149	Krtcap3	chr5	+	A3SS	Spermatid
101	ENSMUSG00000021428	Riok1	chr13	+	A3SS	Spermatid
102	ENSMUSG00000004677	Myo9b	chr8	+	A3SS	Spermatid
103	ENSMUSG00000026004	Kansl1l	chr1	-	A3SS	Spermatid
104	ENSMUSG00000046691	Chtf8	chr8	-	A3SS	Spermatid
105	ENSMUSG00000052656	Rnf103	chr6	+	A3SS	Spermatid
106	ENSMUSG00000038412	Higd1a	chr9	-	A3SS	Spermatid
107	ENSMUSG00000040669	Phc1	chr6	-	A3SS	Spermatid
108	ENSMUSG00000018570	2810408A11Rik	chr11	-	A3SS	Spermatid
109	ENSMUSG00000053477	Tcf4	chr18	+	A3SS	Spermatid
110	ENSMUSG00000040667	Nup88	chr11	-	A3SS	Spermatid
111	ENSMUSG00000002105	Slc39a13	chr2	-	A3SS	Spermatid
112	ENSMUSG00000063870	Chd4	chr6	+	A3SS	Spermatid
113	ENSMUSG00000024906	Mus81	chr19	-	A3SS	Spermatid
114	ENSMUSG00000029238	Clock	chr5	-	A3SS	Spermatid
115	ENSMUSG00000033767	Tmem131l	chr3	-	A3SS	Spermatid
116	ENSMUSG00000020982	Nemf	chr12	-	A3SS	Spermatid
117	ENSMUSG00000025793	Hgs	chr11	+	A3SS	Spermatid
118	ENSMUSG00000018433	Nol11	chr11	-	A3SS	Spermatid
119	ENSMUSG00000031156	Slc35a2	chrX	+	A3SS	Spermatid
120	ENSMUSG00000044876	Zfp444	chr7	+	A3SS	Spermatid
121	ENSMUSG00000027652	Ralgapb	chr2	+	A3SS	Spermatid
122	ENSMUSG00000002395	Use1	chr8	+	A3SS	Spermatid
123	ENSMUSG00000037426	Depdc5	chr5	+	A3SS	Spermatid
124	ENSMUSG00000032803	Cdv3	chr9	-	A3SS	Spermatid
125	ENSMUSG00000024735	Prpf19	chr19	+	A3SS	Spermatid
126	ENSMUSG00000035266	Helq	chr5	-	A3SS	Spermatid
127	ENSMUSG00000064302	Clasp1	chr1	+	A3SS	Spermatid
128	ENSMUSG00000004221	Ikbkg	chrX	+	A3SS	Spermatid
129	ENSMUSG00000030032	Wdr54	chr6	-	A3SS	Spermatid
130	ENSMUSG00000021431	Snrnp48	chr13	+	A3SS	Spermatid
131	ENSMUSG00000025159	Mms19	chr19	-	A3SS	Spermatid
132	ENSMUSG00000021905	Dph3	chr14	-	A3SS	Spermatid
133	ENSMUSG00000047417	Rexo1	chr10	-	A3SS	Spermatid
134	ENSMUSG00000048677	Tpcn2	chr7	-	A3SS	Spermatid
135	ENSMUSG00000027411	Vps16	chr2	+	A3SS	Spermatid
136	ENSMUSG00000004562	Arhgef40	chr14	+	A3SS	Spermatid
137	ENSMUSG00000030689	Ino80e	chr7	-	A3SS	Spermatid
138	ENSMUSG00000025932	Eya1	chr1	-	A3SS	Spermatid
139	ENSMUSG00000028249	Sdcbp	chr4	+	A3SS	Spermatid
140	ENSMUSG00000012535	Tnpo3	chr6	-	A3SS	Spermatid
141	ENSMUSG00000029141	Slc4a1ap	chr5	+	A3SS	Spermatid
142	ENSMUSG00000021819	Zswim8	chr14	+	A3SS	Spermatid
143	ENSMUSG00000021704	Mtx3	chr13	+	A3SS	Spermatid
144	ENSMUSG00000027466	Rbck1	chr2	-	A3SS	Spermatid
145	ENSMUSG00000036779	Papd5	chr8	+	A3SS	Spermatid
146	ENSMUSG00000023079	Gtf2ird1	chr5	-	A3SS	Spermatid
147	ENSMUSG00000030814	Bcl7c	chr7	-	A3SS	Spermatid
148	ENSMUSG00000029016	Clcn6	chr4	-	A3SS	Spermatid
149	ENSMUSG00000002804	Nudt14	chr12	-	A3SS	Spermatid
150	ENSMUSG00000040712	Camta2	chr11	-	A3SS	Spermatid
151	ENSMUSG00000023262	Acy1	chr9	-	A3SS	Spermatid
152	ENSMUSG00000036819	Jmjd4	chr11	+	A3SS	Spermatid
153	ENSMUSG00000068329	Htra2	chr6	-	A3SS	Spermatid
154	ENSMUSG00000040785	Ttc3	chr16	+	A3SS	Spermatid
155	ENSMUSG00000000037	Scml2	chrX	+	A3SS	Spermatid
156	ENSMUSG00000005069	Pex5	chr6	-	A3SS	Spermatid
157	ENSMUSG00000026090	2010300C02Rik	chr1	-	A3SS	Spermatid
158	ENSMUSG00000037313	Tacc3	chr5	+	A3SS	Spermatid
159	ENSMUSG00000031516	Dctn6	chr8	-	A3SS	Spermatid
160	ENSMUSG00000030846	Tial1	chr7	-	A3SS	Spermatid
161	ENSMUSG00000031667	Aktip	chr8	-	A3SS	Spermatid
162	ENSMUSG00000026798	Coq4	chr2	+	A3SS	Spermatid
163	ENSMUSG00000025437	Usp33	chr3	+	A3SS	Spermatid
164	ENSMUSG00000033985	Tesk2	chr4	+	A3SS	Spermatid
165	ENSMUSG00000035569	Ankrd11	chr8	-	A3SS	Spermatid
166	ENSMUSG00000045672	Col27a1	chr4	+	A3SS	Spermatid
167	ENSMUSG00000044676	Zfp612	chr8	+	A3SS	Spermatid
168	ENSMUSG00000097290	1300002E11Rik	chr16	+	A3SS	Spermatid
169	ENSMUSG00000021235	Coq6	chr12	+	A3SS	Spermatid
170	ENSMUSG00000001909	Trmt1	chr8	+	A3SS	Spermatid
171	ENSMUSG00000019373	Cops3	chr11	-	A3SS	Spermatid
172	ENSMUSG00000046432	Bex3	chrX	+	A3SS	Spermatid
173	ENSMUSG00000032178	Ilf3	chr9	+	A3SS	Spermatid
174	ENSMUSG00000004626	Stxbp2	chr8	+	A3SS	Spermatid
175	ENSMUSG00000037904	Ankrd9	chr12	-	A3SS	Spermatid
176	ENSMUSG00000029145	Eif2b4	chr5	-	A3SS	Spermatid
177	ENSMUSG00000038346	Zfp384	chr6	+	A3SS	Spermatid
178	ENSMUSG00000030638	Sh3gl3	chr7	+	A3SS	Spermatid
179	ENSMUSG00000069769	Msi2	chr11	-	A3SS	Spermatid
180	ENSMUSG00000037474	Dtl	chr1	-	A3SS	Spermatid
181	ENSMUSG00000020070	Rufy2	chr10	+	A3SS	Spermatid
182	ENSMUSG00000040455	Usp45	chr4	+	A3SS	Spermatid
183	ENSMUSG00000034813	Grip1	chr10	+	A3SS	Spermatid
184	ENSMUSG00000032567	Aste1	chr9	+	A3SS	Spermatid
185	ENSMUSG00000030271	Ogg1	chr6	+	A3SS	Spermatid
186	ENSMUSG00000025616	Usp16	chr16	+	A3SS	Spermatid
187	ENSMUSG00000036503	Rnf13	chr3	+	A3SS	Spermatid
188	ENSMUSG00000021694	Ercc8	chr13	+	A3SS	Spermatid
189	ENSMUSG00000031314	Taf1	chrX	+	A3SS	Spermatid
190	ENSMUSG00000059834	Sclt1	chr3	-	A3SS	Spermatid
191	ENSMUSG00000026269	Rnpepl1	chr1	+	A3SS	Spermatid
192	ENSMUSG00000026821	Ralgds	chr2	+	A3SS	Spermatid
193	ENSMUSG00000032217	Rnf111	chr9	-	A3SS	Spermatid
194	ENSMUSG00000034560	Washc4	chr10	+	A3SS	Spermatid
195	ENSMUSG00000029705	Cux1	chr5	-	A3SS	Spermatid
196	ENSMUSG00000090266	Mettl23	chr11	+	A3SS	Spermatid
197	ENSMUSG00000037552	Plekhg2	chr7	-	A3SS	Spermatid
198	ENSMUSG00000034928	Rnf44	chr13	-	A3SS	Spermatid
199	ENSMUSG00000019822	Smpd2	chr10	-	A3SS	Spermatid
200	ENSMUSG00000035021	Baz1a	chr12	-	A3SS	Spermatid
201	ENSMUSG00000018661	Cog1	chr11	+	A3SS	Spermatid
202	ENSMUSG00000024160	Spsb3	chr17	+	A3SS	Spermatid
203	ENSMUSG00000027088	Phospho2	chr2	+	A3SS	Spermatid
204	ENSMUSG00000062590	Armc9	chr1	+	A3SS	Spermatid
205	ENSMUSG00000031485	Prosc	chr8	+	A3SS	Spermatid
206	ENSMUSG00000014873	Surf2	chr2	+	A3SS	Spermatid
207	ENSMUSG00000032480	Dhx30	chr9	-	A3SS	Spermatid
208	ENSMUSG00000019471	Cdc37	chr9	-	A3SS	Spermatid
209	ENSMUSG00000029130	Rnf32	chr5	+	A3SS	Spermatid
210	ENSMUSG00000043987	Cep164	chr9	-	A3SS	Spermatid
211	ENSMUSG00000020594	Pum2	chr12	+	A3SS	Spermatid
212	ENSMUSG00000024430	Cabyr	chr18	+	A3SS	Spermatid
213	ENSMUSG00000041264	Uspl1	chr5	+	A3SS	Spermatid
214	ENSMUSG00000027677	Ttc14	chr3	+	A3SS	Spermatid
215	ENSMUSG00000030091	Nup210	chr6	-	A3SS	Spermatid
216	ENSMUSG00000020654	Adcy3	chr12	+	A3SS	Spermatid
217	ENSMUSG00000063455	D630045J12Rik	chr6	-	A3SS	Spermatid
218	ENSMUSG00000032913	Lrig2	chr3	-	A3SS	Spermatid
219	ENSMUSG00000029209	Gnpda2	chr5	-	A3SS	Spermatid
220	ENSMUSG00000030929	Eri2	chr7	-	A3SS	Spermatid
221	ENSMUSG00000023994	Nfya	chr17	-	A3SS	Spermatid
222	ENSMUSG00000042594	Sh2b3	chr5	-	A3SS	Spermatid
223	ENSMUSG00000039542	Ncam1	chr9	-	A3SS	Spermatid
224	ENSMUSG00000044072	Eml6	chr11	-	A3SS	Spermatid
225	ENSMUSG00000006720	Zfp184	chr13	+	A3SS	Spermatid
226	ENSMUSG00000028347	Tmeff1	chr4	+	A3SS	Spermatid
227	ENSMUSG00000074358	Ccdc61	chr7	-	A3SS	Spermatid
228	ENSMUSG00000017418	Arl5b	chr2	+	A3SS	Spermatid
229	ENSMUSG00000031816	Mthfsd	chr8	-	A3SS	Spermatid
230	ENSMUSG00000060073	Psma3	chr12	+	A3SS	Spermatid
231	ENSMUSG00000112117	RMST_1	chr10	-	A3SS	Spermatid
232	ENSMUSG00000029003	Mad2l2	chr4	+	A3SS	Spermatid
233	ENSMUSG00000032525	Nktr	chr9	+	A3SS	Spermatid
234	ENSMUSG00000037692	Ahdc1	chr4	+	A3SS	Spermatid
235	ENSMUSG00000024914	Drap1	chr19	-	A3SS	Spermatid
236	ENSMUSG00000010110	Stx5a	chr19	+	A3SS	Spermatid
237	ENSMUSG00000036860	Mrpl55	chr11	+	A3SS	Spermatid
238	ENSMUSG00000028453	Fancg	chr4	-	A3SS	Spermatid
239	ENSMUSG00000027620	Rbm39	chr2	-	A3SS	Spermatid
240	ENSMUSG00000031392	Irak1	chrX	-	A3SS	Spermatid
241	ENSMUSG00000021906	Oxnad1	chr14	+	A3SS	Spermatid
242	ENSMUSG00000025967	Eef1b2	chr1	+	A3SS	Spermatid
243	ENSMUSG00000041679	Lrrc29	chr8	-	A3SS	Spermatid
244	ENSMUSG00000028060	2810403A07Rik	chr3	+	A3SS	Spermatid
245	ENSMUSG00000038733	Wdr26	chr1	-	A3SS	Spermatid
246	ENSMUSG00000029012	Orc5	chr5	-	A3SS	Spermatid
247	ENSMUSG00000038274	Fau	chr19	+	A3SS	Spermatid
248	ENSMUSG00000028360	Slc44a5	chr3	+	A3SS	Spermatid
249	ENSMUSG00000030409	Dmpk	chr7	+	A3SS	Spermatid
250	ENSMUSG00000034059	Ypel4	chr2	+	A3SS	Spermatid
251	ENSMUSG00000040688	Tbl3	chr17	-	A3SS	Spermatid
252	ENSMUSG00000028671	Gale	chr4	+	A3SS	Spermatid
253	ENSMUSG00000034175	Rhbdd3	chr11	+	A3SS	Spermatid
254	ENSMUSG00000039660	Spout1	chr2	-	A3SS	Spermatid
255	ENSMUSG00000020472	Zkscan17	chr11	-	A3SS	Spermatid
256	ENSMUSG00000040370	Etfrf1	chr6	+	A3SS	Spermatid
257	ENSMUSG00000080316	Spaca6	chr17	+	A3SS	Spermatid
258	ENSMUSG00000045503	Sys1	chr2	+	A3SS	Spermatid
259	ENSMUSG00000061474	Mrps36	chr13	-	A3SS	Spermatid
260	ENSMUSG00000035798	Zdhhc17	chr10	-	A3SS	Spermatid
261	ENSMUSG00000051811	Cox6b2	chr7	-	A3SS	Spermatid
262	ENSMUSG00000040865	Ino80d	chr1	-	A3SS	Spermatid
263	ENSMUSG00000039994	Timeless	chr10	+	A3SS	Spermatid
264	ENSMUSG00000039536	Stau1	chr2	-	A3SS	Spermatid
265	ENSMUSG00000035545	Leng8	chr7	+	A3SS	Spermatid
266	ENSMUSG00000000605	Clcn4	chr7	-	A3SS	Spermatid
267	ENSMUSG00000025199	Chuk	chr19	-	A3SS	Spermatid
268	ENSMUSG00000041341	Atg2b	chr12	-	A3SS	Spermatid
269	ENSMUSG00000018449	Rpain	chr11	+	A3SS	Spermatid
270	ENSMUSG00000030761	Myo7a	chr7	-	A3SS	Spermatid
271	ENSMUSG00000068823	Csde1	chr3	+	A3SS	Spermatid
272	ENSMUSG00000029625	Cpsf4	chr5	+	A3SS	Spermatid
273	ENSMUSG00000036733	Rbm42	chr7	-	A3SS	Spermatid
274	ENSMUSG00000022827	Rabl3	chr16	+	A3SS	Spermatid
275	ENSMUSG00000014418	Hps5	chr7	-	A3SS	Spermatid
276	ENSMUSG00000028689	Ccdc163	chr4	+	A3SS	Spermatid
277	ENSMUSG00000030330	Ing4	chr6	+	A3SS	Spermatid
278	ENSMUSG00000028382	Ptbp3	chr4	-	A3SS	Spermatid
279	ENSMUSG00000057649	Brd9	chr13	+	A3SS	Spermatid
280	ENSMUSG00000073411	H2-D1	chr17	+	A3SS	Spermatid
281	ENSMUSG00000002409	Dyrk1b	chr7	+	A3SS	Spermatid
282	ENSMUSG00000029510	Gpc2	chr5	-	A3SS	Spermatid
283	ENSMUSG00000042709	Atpaf2	chr11	-	A3SS	Spermatid
284	ENSMUSG00000029089	5730480H06Rik	chr5	+	A3SS	Spermatid
285	ENSMUSG00000038056	Kmt2c	chr5	-	A3SS	Spermatid
286	ENSMUSG00000034349	Smc4	chr3	+	A3SS	Spermatid
287	ENSMUSG00000032280	Tle3	chr9	+	A3SS	Spermatid
288	ENSMUSG00000021012	Zc3h14	chr12	+	A3SS	Spermatid
289	ENSMUSG00000043262	Uevld	chr7	-	A3SS	Spermatid
290	ENSMUSG00000005804	Bloc1s6	chr2	+	A3SS	Spermatid
291	ENSMUSG00000037355	Uvssa	chr5	+	A3SS	Spermatid
292	ENSMUSG00000034729	Mrps10	chr17	+	A3SS	Spermatid
293	ENSMUSG00000074247	Dda1	chr8	+	A3SS	Spermatid
294	ENSMUSG00000038324	Trpc4ap	chr2	-	A3SS	Spermatid
295	ENSMUSG00000020166	Cnot2	chr10	-	A3SS	Spermatid
296	ENSMUSG00000028064	Sema4a	chr3	-	A3SS	Spermatid
297	ENSMUSG00000005982	Naa60	chr16	+	A3SS	Spermatid
298	ENSMUSG00000010660	Plcd1	chr9	-	A3SS	Spermatid
299	ENSMUSG00000033439	Trmt13	chr3	-	A3SS	Spermatid
300	ENSMUSG00000024963	Dnajc4	chr19	-	A3SS	Spermatid
301	ENSMUSG00000029592	Usp30	chr5	+	A3SS	Spermatid
302	ENSMUSG00000005417	Mprip	chr11	+	A3SS	Spermatid
303	ENSMUSG00000052593	Adam17	chr12	-	A3SS	Spermatid
304	ENSMUSG00000042508	Dmtf1	chr5	-	A3SS	Spermatid
305	ENSMUSG00000005899	Smpd4	chr16	+	A3SS	Spermatid
306	ENSMUSG00000028545	Bend5	chr4	+	A3SS	Spermatid
307	ENSMUSG00000041408	Wapl	chr14	+	A3SS	Spermatid
308	ENSMUSG00000036636	Clcn7	chr17	+	A3SS	Spermatid
309	ENSMUSG00000067629	Syngap1	chr17	+	A3SS	Spermatid
310	ENSMUSG00000020476	Dbnl	chr11	+	A3SS	Spermatid
311	ENSMUSG00000020212	Mdm1	chr10	+	A3SS	Spermatid
312	ENSMUSG00000041638	Gcn1l1	chr5	+	A3SS	Spermatid
313	ENSMUSG00000060862	Zbtb40	chr4	-	A3SS	Spermatid
314	ENSMUSG00000027247	Arhgap1	chr2	+	A3SS	Spermatid
315	ENSMUSG00000044573	Acp1	chr12	-	A3SS	Spermatid
316	ENSMUSG00000026335	Pam	chr1	-	A3SS	Spermatid
317	ENSMUSG00000055762	Eef1d	chr15	-	A3SS	Spermatid
318	ENSMUSG00000033596	Rfwd3	chr8	-	A3SS	Spermatid
319	ENSMUSG00000029469	Ift81	chr5	-	A3SS	Spermatid
320	ENSMUSG00000025509	Pnpla2	chr7	+	A3SS	Spermatid
321	ENSMUSG00000033703	Fuk	chr8	-	A3SS	Spermatid
322	ENSMUSG00000017686	Rhot1	chr11	+	A3SS	Spermatid
323	ENSMUSG00000033055	Ankrd54	chr15	-	A3SS	Spermatid
324	ENSMUSG00000034563	Ccpg1	chr9	+	A3SS	Spermatid
325	ENSMUSG00000034573	Ptpn13	chr5	+	A3SS	Spermatid
326	ENSMUSG00000070565	Rasal2	chr1	-	A3SS	Spermatid
327	ENSMUSG00000027365	Trpm7	chr2	-	A3SS	Spermatid
328	ENSMUSG00000003873	Bax	chr7	-	A3SS	Spermatid
329	ENSMUSG00000031708	Tecr	chr8	-	A3SS	Spermatid
330	ENSMUSG00000042826	Fgf11	chr11	-	A3SS	Spermatid
331	ENSMUSG00000005583	Mef2c	chr13	+	A3SS	Spermatid
332	ENSMUSG00000026020	Nop58	chr1	+	A3SS	Spermatid
333	ENSMUSG00000038695	Josd2	chr7	+	A3SS	Spermatid
334	ENSMUSG00000017417	Plxdc1	chr11	-	A3SS	Spermatid
335	ENSMUSG00000039458	Mtmr12	chr15	+	A3SS	Spermatid
336	ENSMUSG00000026456	Cyb5r1	chr1	+	A3SS	Spermatid
337	ENSMUSG00000020747	Tmem94	chr11	+	A3SS	Spermatid
338	ENSMUSG00000018076	Med13l	chr5	+	A3SS	Spermatid
339	ENSMUSG00000027001	Dusp19	chr2	+	A3SS	Spermatid
340	ENSMUSG00000046897	Zfp740	chr15	+	A3SS	Spermatid
341	ENSMUSG00000049339	Retreg2	chr1	+	A3SS	Spermatid
342	ENSMUSG00000061286	Exosc5	chr7	+	A3SS	Spermatid
343	ENSMUSG00000020220	Vps13d	chr4	-	A3SS	Spermatid
344	ENSMUSG00000059475	Zfp426	chr9	-	A3SS	Spermatid
345	ENSMUSG00000041769	Ppp2r2d	chr7	+	A3SS	Spermatid
346	ENSMUSG00000036270	Edc4	chr8	+	A3SS	Spermatid
347	ENSMUSG00000023007	Prpf40b	chr15	+	A3SS	Spermatid
348	ENSMUSG00000035382	Pcsk7	chr9	+	A3SS	Spermatid
349	ENSMUSG00000040928	S100pbp	chr4	-	A3SS	Spermatid
350	ENSMUSG00000006010	BC003331	chr1	-	A3SS	Spermatid
351	ENSMUSG00000019856	Fam184a	chr10	-	A3SS	Spermatid
352	ENSMUSG00000041164	Zmiz2	chr11	+	A3SS	Spermatid
353	ENSMUSG00000062296	Trank1	chr9	+	A3SS	Spermatid
354	ENSMUSG00000028864	Hgf	chr5	+	A3SS	Spermatid
355	ENSMUSG00000047554	Tmem41b	chr7	-	A3SS	Spermatid
356	ENSMUSG00000025591	Tma16	chr8	-	A3SS	Spermatid
357	ENSMUSG00000039137	Whrn	chr4	-	A3SS	Spermatid
358	ENSMUSG00000038895	Zfp653	chr9	-	A3SS	Spermatid
359	ENSMUSG00000000134	Tfe3	chrX	+	A3SS	Spermatid
360	ENSMUSG00000032299	Commd4	chr9	-	A3SS	Spermatid
361	ENSMUSG00000026708	Cenpl	chr1	+	A3SS	Spermatid
362	ENSMUSG00000042570	Mier2	chr10	-	A3SS	Spermatid
363	ENSMUSG00000025337	Sbds	chr5	-	A3SS	Spermatid
364	ENSMUSG00000029192	Tbc1d14	chr5	-	A3SS	Spermatid
365	ENSMUSG00000028639	Ybx1	chr4	-	A3SS	Spermatid
366	ENSMUSG00000028059	Arhgef2	chr3	+	A3SS	Spermatid
367	ENSMUSG00000045482	Trrap	chr5	+	A3SS	Spermatid
368	ENSMUSG00000028034	Fubp1	chr3	+	A3SS	Spermatid
369	ENSMUSG00000035203	Epn1	chr7	+	A3SS	Spermatid
370	ENSMUSG00000051278	Zgrf1	chr3	+	A3SS	Spermatid
371	ENSMUSG00000028134	Ptbp2	chr3	-	A3SS	Spermatid
372	ENSMUSG00000000131	Xpo6	chr7	-	A3SS	Spermatid
373	ENSMUSG00000001844	Zdhhc4	chr5	-	A3SS	Spermatid
374	ENSMUSG00000044328	Trp53i13	chr11	-	A3SS	Spermatid
375	ENSMUSG00000032562	Gnai2	chr9	-	A3SS	Spermatid
376	ENSMUSG00000003309	Ap1m2	chr9	-	A3SS	Spermatid
377	ENSMUSG00000062729	Ppox	chr1	-	A3SS	Spermatid
378	ENSMUSG00000002983	Relb	chr7	-	A3SS	Spermatid
379	ENSMUSG00000005442	Cic	chr7	+	A3SS	Spermatid
380	ENSMUSG00000031851	Ntpcr	chr8	+	A3SS	Spermatid
381	ENSMUSG00000003299	Mrpl4	chr9	+	A3SS	Spermatid
382	ENSMUSG00000024483	Ankhd1	chr18	+	A3SS	Spermatid
383	ENSMUSG00000025409	Mbd6	chr10	-	A3SS	Spermatid
384	ENSMUSG00000020590	Snx13	chr12	+	A3SS	Spermatid
385	ENSMUSG00000000600	Krit1	chr5	+	A3SS	Spermatid
386	ENSMUSG00000041975	Mettl8	chr2	-	A3SS	Spermatid
387	ENSMUSG00000031922	Cep57	chr9	-	A3SS	Spermatid
388	ENSMUSG00000019254	Ppp1r12c	chr7	-	A3SS	Spermatid
389	ENSMUSG00000060601	Nr1h2	chr7	-	A3SS	Spermatid
390	ENSMUSG00000042388	Dlgap3	chr4	+	A3SS	Spermatid
391	ENSMUSG00000005882	Uqcc1	chr2	-	A3SS	Spermatid
392	ENSMUSG00000014668	Chfr	chr5	+	A3SS	Spermatid
393	ENSMUSG00000042524	Sun2	chr15	-	A3SS	Spermatid
394	ENSMUSG00000000441	Raf1	chr6	-	A3SS	Spermatid
395	ENSMUSG00000032058	Ppp2r1b	chr9	+	A3SS	Spermatid
396	ENSMUSG00000023952	Gtpbp2	chr17	+	A3SS	Spermatid
397	ENSMUSG00000039176	Polg	chr7	-	A3SS	Spermatid
398	ENSMUSG00000046836	Brox	chr1	-	A3SS	Spermatid
399	ENSMUSG00000025575	Cant1	chr11	-	A3SS	Spermatid
400	ENSMUSG00000023707	Ogfod2	chr5	+	A3SS	Spermatid
401	ENSMUSG00000023904	Hcfc1r1	chr17	+	A3SS	Spermatid
402	ENSMUSG00000002833	Hdgfl2	chr17	+	A3SS	Spermatid
403	ENSMUSG00000034327	Kctd9	chr14	+	A3SS	Spermatid
404	ENSMUSG00000033111	3830406C13Rik	chr14	+	A3SS	Spermatid
405	ENSMUSG00000014402	Tsg101	chr7	-	A3SS	Spermatid
406	ENSMUSG00000061689	Dlgap4	chr2	+	A3SS	Spermatid
407	ENSMUSG00000039242	B3galnt2	chr13	+	A3SS	Spermatid
408	ENSMUSG00000060036	Rpl3	chr15	-	A3SS	Spermatid
409	ENSMUSG00000060206	Zfp462	chr4	+	A3SS	Spermatid
410	ENSMUSG00000025372	Baiap2	chr11	+	A3SS	Spermatid
411	ENSMUSG00000091803	Cox16	chr12	-	A3SS	Spermatid
412	ENSMUSG00000043909	Trp53bp1	chr2	-	A3SS	Spermatid
413	ENSMUSG00000039068	Zzz3	chr3	+	A3SS	Spermatid
414	ENSMUSG00000052337	Immt	chr6	+	A3SS	Spermatid
415	ENSMUSG00000030663	1110004F10Rik	chr7	+	A3SS	Spermatid
416	ENSMUSG00000061559	Wdr61	chr9	-	A3SS	Spermatid
417	ENSMUSG00000026455	Klhl12	chr1	+	A3SS	Spermatid
418	ENSMUSG00000071533	Pcnp	chr16	-	A3SS	Spermatid
419	ENSMUSG00000032582	Rbm6	chr9	-	A3SS	Spermatid
420	ENSMUSG00000024283	Wac	chr18	+	A3SS	Spermatid
421	ENSMUSG00000041757	Plekha6	chr1	+	A3SS	Spermatid
422	ENSMUSG00000018727	Cpsf4l	chr11	-	A3SS	Spermatid
423	ENSMUSG00000028066	Pmf1	chr3	-	A3SS	Spermatid
424	ENSMUSG00000032966	Fkbp1a	chr2	+	A3SS	Spermatid
425	ENSMUSG00000030583	Sipa1l3	chr7	-	A3SS	Spermatid
426	ENSMUSG00000059939	9430015G10Rik	chr4	+	A3SS	Spermatid
427	ENSMUSG00000020659	Cbll1	chr12	-	A3SS	Spermatid
428	ENSMUSG00000023991	Foxp4	chr17	-	A3SS	Spermatid
429	ENSMUSG00000037652	Phc3	chr3	-	A3SS	Spermatid
430	ENSMUSG00000037466	4930427A07Rik	chr12	+	A3SS	Spermatid
431	ENSMUSG00000021112	Mpp5	chr12	+	A3SS	Spermatid
432	ENSMUSG00000022387	Brd1	chr15	-	A3SS	Spermatid
433	ENSMUSG00000026790	Odf2	chr2	+	A3SS	Spermatid
434	ENSMUSG00000030323	Ift122	chr6	+	A3SS	Spermatid
435	ENSMUSG00000060261	Gtf2i	chr5	-	A3SS	Spermatid
436	ENSMUSG00000028952	Zbtb48	chr4	-	A3SS	Spermatid
437	ENSMUSG00000006392	Med8	chr4	+	A3SS	Spermatid
438	ENSMUSG00000056228	Cars2	chr8	-	A3SS	Spermatid
439	ENSMUSG00000029389	Ddx55	chr5	+	A3SS	Spermatid
440	ENSMUSG00000042185	Nfrkb	chr9	+	A3SS	Spermatid
441	ENSMUSG00000037995	Igsf9	chr1	+	A3SS	Spermatid
442	ENSMUSG00000033808	Tmem87a	chr2	-	A3SS	Spermatid
443	ENSMUSG00000038271	Iffo1	chr6	+	A3SS	Spermatid
444	ENSMUSG00000025193	Cutc	chr19	+	A3SS	Spermatid
445	ENSMUSG00000041420	Meis3	chr7	+	A3SS	Spermatid
446	ENSMUSG00000036817	Sun1	chr5	+	A3SS	Spermatid
447	ENSMUSG00000035597	Prpf39	chr12	+	A3SS	Spermatid
448	ENSMUSG00000035505	Cox18	chr5	-	A3SS	Spermatid
449	ENSMUSG00000063450	Syne2	chr12	+	A3SS	Spermatid
450	ENSMUSG00000017715	Pgs1	chr11	+	A3SS	Spermatid
451	ENSMUSG00000036622	Atp13a2	chr4	+	A3SS	Spermatid
452	ENSMUSG00000005312	Ubqln1	chr13	-	A3SS	Spermatid
453	ENSMUSG00000021519	Mterf3	chr13	-	A3SS	Spermatid
454	ENSMUSG00000037761	Actr5	chr2	+	A3SS	Spermatid
455	ENSMUSG00000071669	Snx29	chr16	+	A3SS	Spermatid
456	ENSMUSG00000028854	Slc9a1	chr4	+	A3SS	Spermatid
457	ENSMUSG00000021134	Srsf5	chr12	+	A3SS	Spermatid
458	ENSMUSG00000018501	Ncor1	chr11	-	A3SS	Spermatid
459	ENSMUSG00000038780	Smurf1	chr5	-	A3SS	Spermatid
460	ENSMUSG00000032316	Clk3	chr9	-	A3SS	Spermatid
461	ENSMUSG00000003549	Ercc1	chr7	+	A3SS	Spermatid
462	ENSMUSG00000062270	Morf4l1	chr9	-	A3SS	Spermatid
463	ENSMUSG00000038000	Acd	chr8	-	A3SS	Spermatid
464	ENSMUSG00000025316	Banp	chr8	+	A3SS	Spermatid
465	ENSMUSG00000030177	Ccdc77	chr6	-	A3SS	Spermatid
466	ENSMUSG00000032633	Flcn	chr11	-	A3SS	Spermatid
467	ENSMUSG00000038533	Cbfa2t2	chr2	+	A3SS	Spermatid
468	ENSMUSG00000032621	Srek1	chr13	-	A3SS	Spermatid
469	ENSMUSG00000037926	Ssh2	chr11	+	A3SS	Spermatid
470	ENSMUSG00000041477	Dcp1b	chr6	+	A3SS	Spermatid
471	ENSMUSG00000029283	Cdc7	chr5	+	A3SS	Spermatid
472	ENSMUSG00000020743	Mif4gd	chr11	-	A3SS	Spermatid
473	ENSMUSG00000033276	Stk36	chr1	+	A3SS	Spermatid
474	ENSMUSG00000012609	Ttll5	chr12	+	A3SS	Spermatid
475	ENSMUSG00000028150	Rorc	chr3	+	A3SS	Spermatid
476	ENSMUSG00000022661	Cd200	chr16	-	A3SS	Spermatid
477	ENSMUSG00000036864	Proser3	chr7	-	A3SS	Spermatid
478	ENSMUSG00000028944	Prkag2	chr5	-	A3SS	Spermatid
479	ENSMUSG00000038775	Vill	chr9	+	A3SS	Spermatid
480	ENSMUSG00000028760	Eif4g3	chr4	+	A3SS	Spermatid
481	ENSMUSG00000020818	Mfsd11	chr11	+	A3SS	Spermatid
482	ENSMUSG00000039936	Pik3cd	chr4	-	A3SS	Spermatid
483	ENSMUSG00000078773	Rad54b	chr4	+	A3SS	Spermatid
484	ENSMUSG00000055723	Rras2	chr7	-	A3SS	Spermatid
485	ENSMUSG00000054387	Mdm4	chr1	-	A3SS	Spermatid
486	ENSMUSG00000038126	Mphosph9	chr5	-	A3SS	Spermatid
487	ENSMUSG00000068917	Clk2	chr3	+	A3SS	Spermatid
488	ENSMUSG00000021546	Hnrnpk	chr13	-	A3SS	Spermatid
489	ENSMUSG00000001416	Cct3	chr3	+	A3SS	Spermatid
490	ENSMUSG00000019802	Sec63	chr10	+	A3SS	Spermatid
491	ENSMUSG00000029165	Agbl5	chr5	+	A3SS	Spermatid
492	ENSMUSG00000022550	Adck5	chr15	+	A3SS	Spermatid
493	ENSMUSG00000068328	Aup1	chr6	+	A3SS	Spermatid
494	ENSMUSG00000041870	Ankrd13a	chr5	+	A3SS	Spermatid
495	ENSMUSG00000013787	Ehmt2	chr17	+	A3SS	Spermatid
496	ENSMUSG00000026074	Map4k4	chr1	+	A3SS	Spermatid
497	ENSMUSG00000058298	Mcm9	chr10	-	A3SS	Spermatid
498	ENSMUSG00000026925	Inpp5e	chr2	-	A3SS	Spermatid
499	ENSMUSG00000029022	Miip	chr4	-	A3SS	Spermatid
500	ENSMUSG00000047248	C2cd3	chr7	+	A3SS	Spermatid
501	ENSMUSG00000004931	Apba3	chr10	+	A3SS	Spermatid
502	ENSMUSG00000028573	Fggy	chr4	+	A3SS	Spermatid
503	ENSMUSG00000025142	Aspscr1	chr11	+	A3SS	Spermatid
504	ENSMUSG00000035632	Cnot3	chr7	+	A3SS	Spermatid
505	ENSMUSG00000029512	Ulk1	chr5	-	A3SS	Spermatid
506	ENSMUSG00000026883	Dab2ip	chr2	+	A3SS	Spermatid
507	ENSMUSG00000016181	Diexf	chr1	-	A3SS	Spermatid
508	ENSMUSG00000000759	Tubgcp3	chr8	-	A3SS	Spermatid
509	ENSMUSG00000019302	Atp6v0a1	chr11	+	A3SS	Spermatid
510	ENSMUSG00000020687	Cdc27	chr11	-	A3SS	Spermatid
511	ENSMUSG00000029064	Gnb1	chr4	+	A3SS	Spermatid
512	ENSMUSG00000030759	Far1	chr7	+	A3SS	Spermatid
513	ENSMUSG00000026219	Trip12	chr1	-	A3SS	Spermatid
514	ENSMUSG00000031626	Sorbs2	chr8	+	A3SS	Spermatid
515	ENSMUSG00000021585	Cast	chr13	-	A3SS	Spermatid
516	ENSMUSG00000057982	Zfp809	chr9	+	A3SS	Spermatid
517	ENSMUSG00000061436	Hipk2	chr6	-	A3SS	Spermatid
518	ENSMUSG00000023051	Tarbp2	chr15	+	A3SS	Spermatid
519	ENSMUSG00000028681	Ptch2	chr4	+	A3SS	Spermatid
520	ENSMUSG00000031065	Cdk16	chrX	+	A3SS	Spermatid
521	ENSMUSG00000029416	Slc15a4	chr5	-	A3SS	Spermatid
522	ENSMUSG00000033763	Mtss1l	chr8	+	A3SS	Spermatid
523	ENSMUSG00000023015	Racgap1	chr15	-	A3SS	Spermatid
524	ENSMUSG00000028809	Srrm1	chr4	-	A3SS	Spermatid
525	ENSMUSG00000039048	Foxred1	chr9	-	A3SS	Spermatid
526	ENSMUSG00000024044	Epb41l3	chr17	+	A3SS	Spermatid
527	ENSMUSG00000036371	Serbp1	chr6	+	A3SS	Spermatid
528	ENSMUSG00000055897	Ppp4r1l-ps	chr2	-	A3SS	Spermatid
529	ENSMUSG00000063511	Snrnp70	chr7	-	A3SS	Spermatid
530	ENSMUSG00000020056	Washc3	chr10	+	A3SS	Spermatid
531	ENSMUSG00000038611	Phrf1	chr7	+	A3SS	Spermatid
532	ENSMUSG00000041977	Arhgef11	chr3	+	A3SS	Spermatid
533	ENSMUSG00000025665	Rps6ka6	chrX	-	A3SS	Spermatid
534	ENSMUSG00000037174	Elf2	chr3	-	A3SS	Spermatid
535	ENSMUSG00000026641	Usf1	chr1	+	A3SS	Spermatid
536	ENSMUSG00000068040	Tm9sf4	chr2	+	A3SS	Spermatid
537	ENSMUSG00000030590	Fam98c	chr7	-	A3SS	Spermatid
538	ENSMUSG00000035125	Gcfc2	chr6	+	A3SS	Spermatid
539	ENSMUSG00000009995	Taz	chrX	+	A3SS	Spermatid
540	ENSMUSG00000038095	Sbno1	chr5	-	A3SS	Spermatid
541	ENSMUSG00000022562	Oplah	chr15	-	A3SS	Spermatid
542	ENSMUSG00000036550	Cnot1	chr8	-	A3SS	Spermatid
543	ENSMUSG00000018572	Phf23	chr11	+	A3SS	Spermatid
544	ENSMUSG00000030035	Wbp1	chr6	-	A3SS	Spermatid
545	ENSMUSG00000028106	Rprd2	chr3	-	A3SS	Spermatid
546	ENSMUSG00000038712	Mindy1	chr3	+	A3SS	Spermatid
547	ENSMUSG00000022999	Lmbr1l	chr15	-	A3SS	Spermatid
548	ENSMUSG00000024201	Kdm4b	chr17	+	A3SS	Spermatid
549	ENSMUSG00000032872	Cyb5r4	chr9	+	A3SS	Spermatid
550	ENSMUSG00000022961	Son	chr16	+	A3SS	Spermatid
551	ENSMUSG00000034269	Setd5	chr6	+	A3SS	Spermatid
552	ENSMUSG00000069601	Ank3	chr10	+	A3SS	Spermatid
553	ENSMUSG00000021275	Tecpr2	chr12	+	A3SS	Spermatid
554	ENSMUSG00000022973	Synj1	chr16	-	A3SS	Spermatid
555	ENSMUSG00000110393	Gm36445	chr13	+	A3SS	Spermatid
556	ENSMUSG00000001017	Chtop	chr3	-	A3SS	Spermatid
557	ENSMUSG00000015176	Nolc1	chr19	+	A3SS	Spermatid
558	ENSMUSG00000022792	Yars2	chr16	+	A3SS	Spermatid
559	ENSMUSG00000052456	Asna1	chr8	-	A3SS	Spermatid
560	ENSMUSG00000020196	Cabin1	chr10	-	A5SS	Spermatid
561	ENSMUSG00000022617	Chkb	chr15	-	A5SS	Spermatid
562	ENSMUSG00000020486	Sept4	chr11	+	A5SS	Spermatid
563	ENSMUSG00000052812	Atad2b	chr12	+	A5SS	Spermatid
564	ENSMUSG00000022884	Eif4a2	chr16	+	A5SS	Spermatid
565	ENSMUSG00000041890	Git2	chr5	-	A5SS	Spermatid
566	ENSMUSG00000032580	Rbm5	chr9	-	A5SS	Spermatid
567	ENSMUSG00000036281	Snapc4	chr2	-	A5SS	Spermatid
568	ENSMUSG00000020882	Cacnb1	chr11	-	A5SS	Spermatid
569	ENSMUSG00000038954	Supt3	chr17	+	A5SS	Spermatid
570	ENSMUSG00000028646	Rragc	chr4	+	A5SS	Spermatid
571	ENSMUSG00000035310	Lin54	chr5	-	A5SS	Spermatid
572	ENSMUSG00000041459	Tardbp	chr4	-	A5SS	Spermatid
573	ENSMUSG00000040174	Alkbh3	chr2	-	A5SS	Spermatid
574	ENSMUSG00000068922	Msto1	chr3	-	A5SS	Spermatid
575	ENSMUSG00000045795	Whamm	chr7	+	A5SS	Spermatid
576	ENSMUSG00000090626	Tex9	chr9	-	A5SS	Spermatid
577	ENSMUSG00000044465	Fam160a2	chr7	-	A5SS	Spermatid
578	ENSMUSG00000021476	Habp4	chr13	+	A5SS	Spermatid
579	ENSMUSG00000035762	Tmem161b	chr13	+	A5SS	Spermatid
580	ENSMUSG00000038429	Usp5	chr6	-	A5SS	Spermatid
581	ENSMUSG00000038838	Vars2	chr17	-	A5SS	Spermatid
582	ENSMUSG00000026107	Nabp1	chr1	-	A5SS	Spermatid
583	ENSMUSG00000035086	Becn1	chr11	-	A5SS	Spermatid
584	ENSMUSG00000024012	Mtch1	chr17	-	A5SS	Spermatid
585	ENSMUSG00000001065	Zfp276	chr8	+	A5SS	Spermatid
586	ENSMUSG00000049658	Bdp1	chr13	-	A5SS	Spermatid
587	ENSMUSG00000020918	Kat2a	chr11	-	A5SS	Spermatid
588	ENSMUSG00000063810	Alms1	chr6	+	A5SS	Spermatid
589	ENSMUSG00000055296	Tmem245	chr4	-	A5SS	Spermatid
590	ENSMUSG00000047284	Neurl4	chr11	+	A5SS	Spermatid
591	ENSMUSG00000034858	Fam214a	chr9	+	A5SS	Spermatid
592	ENSMUSG00000004319	Clcn3	chr8	-	A5SS	Spermatid
593	ENSMUSG00000036980	Taf6	chr5	-	A5SS	Spermatid
594	ENSMUSG00000030990	Pgap2	chr7	+	A5SS	Spermatid
595	ENSMUSG00000070643	Sox13	chr1	-	A5SS	Spermatid
596	ENSMUSG00000047036	Zfp445	chr9	-	A5SS	Spermatid
597	ENSMUSG00000029385	Ccng2	chr5	+	A5SS	Spermatid
598	ENSMUSG00000022770	Dlg1	chr16	+	A5SS	Spermatid
599	ENSMUSG00000021282	Eif5	chr12	+	A5SS	Spermatid
600	ENSMUSG00000062822	4833420G17Rik	chr13	+	A5SS	Spermatid
601	ENSMUSG00000030788	Rnf141	chr7	-	A5SS	Spermatid
602	ENSMUSG00000037935	Smarce1	chr11	-	A5SS	Spermatid
603	ENSMUSG00000032743	D430042O09Rik	chr7	+	A5SS	Spermatid
604	ENSMUSG00000026095	Asnsd1	chr1	-	A5SS	Spermatid
605	ENSMUSG00000017264	Exosc10	chr4	+	A5SS	Spermatid
606	ENSMUSG00000034303	Ccdc15	chr9	-	A5SS	Spermatid
607	ENSMUSG00000037270	4932438A13Rik	chr3	+	A5SS	Spermatid
608	ENSMUSG00000019951	Uhrf1bp1l	chr10	+	A5SS	Spermatid
609	ENSMUSG00000003778	Brd8	chr18	-	A5SS	Spermatid
610	ENSMUSG00000031310	Zmym3	chrX	-	A5SS	Spermatid
611	ENSMUSG00000074165	Zfp788	chr7	+	A5SS	Spermatid
612	ENSMUSG00000005682	Pan2	chr10	+	A5SS	Spermatid
613	ENSMUSG00000037364	Srrt	chr5	-	A5SS	Spermatid
614	ENSMUSG00000021066	Atl1	chr12	+	A5SS	Spermatid
615	ENSMUSG00000030871	Ears2	chr7	-	A5SS	Spermatid
616	ENSMUSG00000033460	Armcx1	chrX	+	A5SS	Spermatid
617	ENSMUSG00000026889	Rbm18	chr2	-	A5SS	Spermatid
618	ENSMUSG00000027550	Lrrcc1	chr3	+	A5SS	Spermatid
619	ENSMUSG00000010608	Rbm25	chr12	+	A5SS	Spermatid
620	ENSMUSG00000040669	Phc1	chr6	-	A5SS	Spermatid
621	ENSMUSG00000074129	Rpl13a	chr7	-	A5SS	Spermatid
622	ENSMUSG00000108414	Snhg1	chr19	+	A5SS	Spermatid
623	ENSMUSG00000005625	Psmd4	chr3	-	A5SS	Spermatid
624	ENSMUSG00000049321	Zfp2	chr11	-	A5SS	Spermatid
625	ENSMUSG00000026927	Sdccag3	chr2	-	A5SS	Spermatid
626	ENSMUSG00000025451	Paip1	chr13	+	A5SS	Spermatid
627	ENSMUSG00000020288	Ahsa2	chr11	-	A5SS	Spermatid
628	ENSMUSG00000001151	Pcnt	chr10	-	A5SS	Spermatid
629	ENSMUSG00000032185	Carm1	chr9	+	A5SS	Spermatid
630	ENSMUSG00000098950	Gm28036	chr2	-	A5SS	Spermatid
631	ENSMUSG00000022704	Qtrt2	chr16	-	A5SS	Spermatid
632	ENSMUSG00000011257	Pabpc4	chr4	+	A5SS	Spermatid
633	ENSMUSG00000031156	Slc35a2	chrX	+	A5SS	Spermatid
634	ENSMUSG00000029267	Mtf2	chr5	+	A5SS	Spermatid
635	ENSMUSG00000036792	Mbd5	chr2	+	A5SS	Spermatid
636	ENSMUSG00000064302	Clasp1	chr1	+	A5SS	Spermatid
637	ENSMUSG00000003923	Tfam	chr10	-	A5SS	Spermatid
638	ENSMUSG00000057637	Prdm2	chr4	-	A5SS	Spermatid
639	ENSMUSG00000027411	Vps16	chr2	+	A5SS	Spermatid
640	ENSMUSG00000004562	Arhgef40	chr14	+	A5SS	Spermatid
641	ENSMUSG00000026577	Blzf1	chr1	-	A5SS	Spermatid
642	ENSMUSG00000022545	Ercc4	chr16	+	A5SS	Spermatid
643	ENSMUSG00000021819	Zswim8	chr14	+	A5SS	Spermatid
644	ENSMUSG00000089736	Tgfbr3l	chr8	+	A5SS	Spermatid
645	ENSMUSG00000039356	Exosc2	chr2	+	A5SS	Spermatid
646	ENSMUSG00000035325	Sec31a	chr5	-	A5SS	Spermatid
647	ENSMUSG00000039652	Cpeb3	chr19	-	A5SS	Spermatid
648	ENSMUSG00000028394	Pole3	chr4	-	A5SS	Spermatid
649	ENSMUSG00000018196	Glrx2	chr1	+	A5SS	Spermatid
650	ENSMUSG00000020184	Mdm2	chr10	-	A5SS	Spermatid
651	ENSMUSG00000025420	Katnal2	chr18	-	A5SS	Spermatid
652	ENSMUSG00000053453	Thoc7	chr14	-	A5SS	Spermatid
653	ENSMUSG00000015090	Ptgds	chr2	-	A5SS	Spermatid
654	ENSMUSG00000037805	Rpl10a	chr17	+	A5SS	Spermatid
655	ENSMUSG00000032041	Tirap	chr9	-	A5SS	Spermatid
656	ENSMUSG00000047193	Dync2h1	chr9	-	A5SS	Spermatid
657	ENSMUSG00000062198	2700097O09Rik	chr12	-	A5SS	Spermatid
658	ENSMUSG00000068329	Htra2	chr6	-	A5SS	Spermatid
659	ENSMUSG00000000902	Smarcb1	chr10	-	A5SS	Spermatid
660	ENSMUSG00000025237	Parp6	chr9	+	A5SS	Spermatid
661	ENSMUSG00000020451	Limk2	chr11	-	A5SS	Spermatid
662	ENSMUSG00000035168	Tanc1	chr2	+	A5SS	Spermatid
663	ENSMUSG00000029478	Ncor2	chr5	-	A5SS	Spermatid
664	ENSMUSG00000026798	Coq4	chr2	+	A5SS	Spermatid
665	ENSMUSG00000037363	Letm2	chr8	-	A5SS	Spermatid
666	ENSMUSG00000038520	Tbc1d17	chr7	-	A5SS	Spermatid
667	ENSMUSG00000030180	Kdm5a	chr6	+	A5SS	Spermatid
668	ENSMUSG00000067367	Lyar	chr5	+	A5SS	Spermatid
669	ENSMUSG00000026634	Angel2	chr1	+	A5SS	Spermatid
670	ENSMUSG00000021235	Coq6	chr12	+	A5SS	Spermatid
671	ENSMUSG00000001909	Trmt1	chr8	+	A5SS	Spermatid
672	ENSMUSG00000028552	Eps15	chr4	+	A5SS	Spermatid
673	ENSMUSG00000038425	Poli	chr18	-	A5SS	Spermatid
674	ENSMUSG00000073795	6430531B16Rik	chr7	-	A5SS	Spermatid
675	ENSMUSG00000026977	March7	chr2	+	A5SS	Spermatid
676	ENSMUSG00000026005	Rpe	chr1	+	A5SS	Spermatid
677	ENSMUSG00000038346	Zfp384	chr6	+	A5SS	Spermatid
678	ENSMUSG00000054874	Pcnx3	chr19	-	A5SS	Spermatid
679	ENSMUSG00000021893	Capn7	chr14	+	A5SS	Spermatid
680	ENSMUSG00000042198	Chchd7	chr4	+	A5SS	Spermatid
681	ENSMUSG00000063047	Zfp780b	chr7	-	A5SS	Spermatid
682	ENSMUSG00000025283	Sat1	chrX	-	A5SS	Spermatid
683	ENSMUSG00000030346	Rad51ap1	chr6	-	A5SS	Spermatid
684	ENSMUSG00000032567	Aste1	chr9	+	A5SS	Spermatid
685	ENSMUSG00000023467	Tulp2	chr7	+	A5SS	Spermatid
686	ENSMUSG00000030057	Cnbp	chr6	-	A5SS	Spermatid
687	ENSMUSG00000061136	Prpf40a	chr2	-	A5SS	Spermatid
688	ENSMUSG00000040482	Dxo	chr17	+	A5SS	Spermatid
689	ENSMUSG00000028284	Map3k7	chr4	+	A5SS	Spermatid
690	ENSMUSG00000015305	Sash1	chr10	-	A5SS	Spermatid
691	ENSMUSG00000025958	Creb1	chr1	+	A5SS	Spermatid
692	ENSMUSG00000060147	Serpinb6a	chr13	-	A5SS	Spermatid
693	ENSMUSG00000019822	Smpd2	chr10	-	A5SS	Spermatid
694	ENSMUSG00000026113	Inpp4a	chr1	+	A5SS	Spermatid
695	ENSMUSG00000026349	Ccnt2	chr1	+	A5SS	Spermatid
696	ENSMUSG00000019710	Mrpl24	chr3	+	A5SS	Spermatid
697	ENSMUSG00000036223	Ska1	chr18	-	A5SS	Spermatid
698	ENSMUSG00000032480	Dhx30	chr9	-	A5SS	Spermatid
699	ENSMUSG00000031812	Map1lc3b	chr8	+	A5SS	Spermatid
700	ENSMUSG00000049659	Aftph	chr11	-	A5SS	Spermatid
701	ENSMUSG00000006304	Arpc2	chr1	+	A5SS	Spermatid
702	ENSMUSG00000070953	Rabepk	chr2	-	A5SS	Spermatid
703	ENSMUSG00000020594	Pum2	chr12	+	A5SS	Spermatid
704	ENSMUSG00000026000	Lancl1	chr1	-	A5SS	Spermatid
705	ENSMUSG00000042772	Smg7	chr1	-	A5SS	Spermatid
706	ENSMUSG00000024430	Cabyr	chr18	+	A5SS	Spermatid
707	ENSMUSG00000026409	Pfkfb2	chr1	-	A5SS	Spermatid
708	ENSMUSG00000027284	Cdan1	chr2	-	A5SS	Spermatid
709	ENSMUSG00000042726	Trafd1	chr5	-	A5SS	Spermatid
710	ENSMUSG00000025980	Hspd1	chr1	-	A5SS	Spermatid
711	ENSMUSG00000013155	Enkd1	chr8	-	A5SS	Spermatid
712	ENSMUSG00000035851	Ythdc1	chr5	+	A5SS	Spermatid
713	ENSMUSG00000006589	Aprt	chr8	-	A5SS	Spermatid
714	ENSMUSG00000059689	Zfp637	chr6	+	A5SS	Spermatid
715	ENSMUSG00000038900	Rpl12	chr2	+	A5SS	Spermatid
716	ENSMUSG00000006720	Zfp184	chr13	+	A5SS	Spermatid
717	ENSMUSG00000013858	Tmem259	chr10	-	A5SS	Spermatid
718	ENSMUSG00000039069	Mtg2	chr2	+	A5SS	Spermatid
719	ENSMUSG00000078485	Plekhn1	chr4	-	A5SS	Spermatid
720	ENSMUSG00000071226	Cecr2	chr6	+	A5SS	Spermatid
721	ENSMUSG00000032525	Nktr	chr9	+	A5SS	Spermatid
722	ENSMUSG00000033799	Fam208b	chr13	-	A5SS	Spermatid
723	ENSMUSG00000056608	Chd9	chr8	+	A5SS	Spermatid
724	ENSMUSG00000056763	Cspp1	chr1	+	A5SS	Spermatid
725	ENSMUSG00000010110	Stx5a	chr19	+	A5SS	Spermatid
726	ENSMUSG00000033416	Gucd1	chr10	-	A5SS	Spermatid
727	ENSMUSG00000058594	Fbxo18	chr2	-	A5SS	Spermatid
728	ENSMUSG00000025006	Sorbs1	chr19	-	A5SS	Spermatid
729	ENSMUSG00000061411	Nol4l	chr2	-	A5SS	Spermatid
730	ENSMUSG00000036452	Arhgap26	chr18	+	A5SS	Spermatid
731	ENSMUSG00000032498	Mlh1	chr9	-	A5SS	Spermatid
732	ENSMUSG00000003190	Bcl2l12	chr7	-	A5SS	Spermatid
733	ENSMUSG00000020260	Pofut2	chr10	+	A5SS	Spermatid
734	ENSMUSG00000029062	Cdk11b	chr4	+	A5SS	Spermatid
735	ENSMUSG00000028797	Tmem234	chr4	+	A5SS	Spermatid
736	ENSMUSG00000068663	Clec16a	chr16	+	A5SS	Spermatid
737	ENSMUSG00000025236	Adpgk	chr9	+	A5SS	Spermatid
738	ENSMUSG00000038241	Cep250	chr2	+	A5SS	Spermatid
739	ENSMUSG00000029439	Sfswap	chr5	+	A5SS	Spermatid
740	ENSMUSG00000048100	Taf13	chr3	+	A5SS	Spermatid
741	ENSMUSG00000030409	Dmpk	chr7	+	A5SS	Spermatid
742	ENSMUSG00000048668	Rhno1	chr6	-	A5SS	Spermatid
743	ENSMUSG00000028295	Smim8	chr4	-	A5SS	Spermatid
744	ENSMUSG00000045466	Zfp956	chr6	+	A5SS	Spermatid
745	ENSMUSG00000022702	Hira	chr16	+	A5SS	Spermatid
746	ENSMUSG00000005150	Wdr83	chr8	-	A5SS	Spermatid
747	ENSMUSG00000028468	Rgp1	chr4	+	A5SS	Spermatid
748	ENSMUSG00000034175	Rhbdd3	chr11	+	A5SS	Spermatid
749	ENSMUSG00000020472	Zkscan17	chr11	-	A5SS	Spermatid
750	ENSMUSG00000053332	Gas5	chr1	+	A5SS	Spermatid
751	ENSMUSG00000020538	Srebf1	chr11	-	A5SS	Spermatid
752	ENSMUSG00000002825	Qtrt1	chr9	+	A5SS	Spermatid
753	ENSMUSG00000045031	Cetn4	chr3	-	A5SS	Spermatid
754	ENSMUSG00000051811	Cox6b2	chr7	-	A5SS	Spermatid
755	ENSMUSG00000029020	Mfn2	chr4	-	A5SS	Spermatid
756	ENSMUSG00000022788	Fgd4	chr16	-	A5SS	Spermatid
757	ENSMUSG00000061288	Taok3	chr5	+	A5SS	Spermatid
758	ENSMUSG00000003402	Prkcsh	chr9	+	A5SS	Spermatid
759	ENSMUSG00000020290	Xpo1	chr11	+	A5SS	Spermatid
760	ENSMUSG00000096768	Erdr1	chrY	+	A5SS	Spermatid
761	ENSMUSG00000033728	Lrrc14	chr15	+	A5SS	Spermatid
762	ENSMUSG00000039205	Ciz1	chr2	+	A5SS	Spermatid
763	ENSMUSG00000057335	Cep170	chr1	-	A5SS	Spermatid
764	ENSMUSG00000022621	Rabl2	chr15	-	A5SS	Spermatid
765	ENSMUSG00000021820	Camk2g	chr14	-	A5SS	Spermatid
766	ENSMUSG00000037369	Kdm6a	chrX	+	A5SS	Spermatid
767	ENSMUSG00000015120	Ube2i	chr17	-	A5SS	Spermatid
768	ENSMUSG00000029625	Cpsf4	chr5	+	A5SS	Spermatid
769	ENSMUSG00000014418	Hps5	chr7	-	A5SS	Spermatid
770	ENSMUSG00000005262	Ufd1	chr16	+	A5SS	Spermatid
771	ENSMUSG00000030330	Ing4	chr6	+	A5SS	Spermatid
772	ENSMUSG00000032280	Tle3	chr9	+	A5SS	Spermatid
773	ENSMUSG00000031921	Terf2	chr8	-	A5SS	Spermatid
774	ENSMUSG00000054405	Dnajc8	chr4	+	A5SS	Spermatid
775	ENSMUSG00000005763	Cd247	chr1	+	A5SS	Spermatid
776	ENSMUSG00000040782	Rfwd2	chr1	+	A5SS	Spermatid
777	ENSMUSG00000012819	Cdh23	chr10	-	A5SS	Spermatid
778	ENSMUSG00000034729	Mrps10	chr17	+	A5SS	Spermatid
779	ENSMUSG00000074247	Dda1	chr8	+	A5SS	Spermatid
780	ENSMUSG00000021668	Polk	chr13	-	A5SS	Spermatid
781	ENSMUSG00000005417	Mprip	chr11	+	A5SS	Spermatid
782	ENSMUSG00000017307	Acot8	chr2	-	A5SS	Spermatid
783	ENSMUSG00000023286	Ube2j2	chr4	+	A5SS	Spermatid
784	ENSMUSG00000035173	Ccdc186	chr19	-	A5SS	Spermatid
785	ENSMUSG00000097195	Snhg5	chr9	-	A5SS	Spermatid
786	ENSMUSG00000063882	Uqcrh	chr4	-	A5SS	Spermatid
787	ENSMUSG00000038836	Agbl3	chr6	+	A5SS	Spermatid
788	ENSMUSG00000026608	Kctd3	chr1	-	A5SS	Spermatid
789	ENSMUSG00000047909	Ankrd16	chr2	+	A5SS	Spermatid
790	ENSMUSG00000010277	2610507B11Rik	chr11	+	A5SS	Spermatid
791	ENSMUSG00000022561	Gpaa1	chr15	+	A5SS	Spermatid
792	ENSMUSG00000056962	Jmjd6	chr11	-	A5SS	Spermatid
793	ENSMUSG00000028796	Phc2	chr4	+	A5SS	Spermatid
794	ENSMUSG00000029290	Zfp326	chr5	+	A5SS	Spermatid
795	ENSMUSG00000037326	Capn15	chr17	-	A5SS	Spermatid
796	ENSMUSG00000044906	4930503L19Rik	chr18	-	A5SS	Spermatid
797	ENSMUSG00000085385	Snhg17	chr2	-	A5SS	Spermatid
798	ENSMUSG00000034684	Sema3f	chr9	-	A5SS	Spermatid
799	ENSMUSG00000031708	Tecr	chr8	-	A5SS	Spermatid
800	ENSMUSG00000037103	Dcaf15	chr8	-	A5SS	Spermatid
801	ENSMUSG00000029166	Mapre3	chr5	+	A5SS	Spermatid
802	ENSMUSG00000021948	Prkcd	chr14	-	A5SS	Spermatid
803	ENSMUSG00000047767	Atg16l2	chr7	-	A5SS	Spermatid
804	ENSMUSG00000002028	Kmt2a	chr9	-	A5SS	Spermatid
805	ENSMUSG00000036902	Neto2	chr8	-	A5SS	Spermatid
806	ENSMUSG00000059439	Bcas3	chr11	+	A5SS	Spermatid
807	ENSMUSG00000039458	Mtmr12	chr15	+	A5SS	Spermatid
808	ENSMUSG00000006315	Tmem147	chr7	-	A5SS	Spermatid
809	ENSMUSG00000021115	Vrk1	chr12	+	A5SS	Spermatid
810	ENSMUSG00000046897	Zfp740	chr15	+	A5SS	Spermatid
811	ENSMUSG00000059540	Tcea2	chr2	+	A5SS	Spermatid
812	ENSMUSG00000059475	Zfp426	chr9	-	A5SS	Spermatid
813	ENSMUSG00000040687	Madd	chr2	-	A5SS	Spermatid
814	ENSMUSG00000000561	Wdr77	chr3	+	A5SS	Spermatid
815	ENSMUSG00000023007	Prpf40b	chr15	+	A5SS	Spermatid
816	ENSMUSG00000097589	Dleu2	chr14	-	A5SS	Spermatid
817	ENSMUSG00000007880	Arid1a	chr4	-	A5SS	Spermatid
818	ENSMUSG00000001143	Lman2l	chr1	-	A5SS	Spermatid
819	ENSMUSG00000040928	S100pbp	chr4	-	A5SS	Spermatid
820	ENSMUSG00000054823	Nsd3	chr8	+	A5SS	Spermatid
821	ENSMUSG00000042520	Ubap2l	chr3	-	A5SS	Spermatid
822	ENSMUSG00000041609	Bicdl1	chr5	-	A5SS	Spermatid
823	ENSMUSG00000027944	Hax1	chr3	-	A5SS	Spermatid
824	ENSMUSG00000030815	Phkg2	chr7	+	A5SS	Spermatid
825	ENSMUSG00000109378	U2af1l4	chr7	+	A5SS	Spermatid
826	ENSMUSG00000022948	Setd4	chr16	-	A5SS	Spermatid
827	ENSMUSG00000002221	Paxip1	chr5	-	A5SS	Spermatid
828	ENSMUSG00000040746	Rnf167	chr11	+	A5SS	Spermatid
829	ENSMUSG00000052105	Mtcl1	chr17	-	A5SS	Spermatid
830	ENSMUSG00000033543	Gtf2a2	chr9	+	A5SS	Spermatid
831	ENSMUSG00000011658	Fuz	chr7	+	A5SS	Spermatid
832	ENSMUSG00000007833	Aldh16a1	chr7	-	A5SS	Spermatid
833	ENSMUSG00000049550	Clip1	chr5	-	A5SS	Spermatid
834	ENSMUSG00000030733	Sh2b1	chr7	-	A5SS	Spermatid
835	ENSMUSG00000000131	Xpo6	chr7	-	A5SS	Spermatid
836	ENSMUSG00000001844	Zdhhc4	chr5	-	A5SS	Spermatid
837	ENSMUSG00000022789	Dnm1l	chr16	-	A5SS	Spermatid
838	ENSMUSG00000031556	Tm2d2	chr8	+	A5SS	Spermatid
839	ENSMUSG00000062729	Ppox	chr1	-	A5SS	Spermatid
840	ENSMUSG00000036078	Sigmar1	chr4	-	A5SS	Spermatid
841	ENSMUSG00000029587	Zfp12	chr5	+	A5SS	Spermatid
842	ENSMUSG00000004568	Arhgef18	chr8	+	A5SS	Spermatid
843	ENSMUSG00000048264	Dip2c	chr13	+	A5SS	Spermatid
844	ENSMUSG00000021901	Bap1	chr14	+	A5SS	Spermatid
845	ENSMUSG00000024293	Esco1	chr18	-	A5SS	Spermatid
846	ENSMUSG00000041594	Tmtc4	chr14	-	A5SS	Spermatid
847	ENSMUSG00000039087	Rreb1	chr13	+	A5SS	Spermatid
848	ENSMUSG00000028047	Thbs3	chr3	+	A5SS	Spermatid
849	ENSMUSG00000022558	Mroh1	chr15	+	A5SS	Spermatid
850	ENSMUSG00000014767	Tbp	chr17	+	A5SS	Spermatid
851	ENSMUSG00000021962	Dcp1a	chr14	+	A5SS	Spermatid
852	ENSMUSG00000021139	Gm20498	chr12	-	A5SS	Spermatid
853	ENSMUSG00000041328	Pcf11	chr7	-	A5SS	Spermatid
854	ENSMUSG00000029687	Ezh2	chr6	-	A5SS	Spermatid
855	ENSMUSG00000020572	Nampt	chr12	+	A5SS	Spermatid
856	ENSMUSG00000040701	Ap1g2	chr14	-	A5SS	Spermatid
857	ENSMUSG00000026439	Rbbp5	chr1	+	A5SS	Spermatid
858	ENSMUSG00000075703	Selenoi	chr5	+	A5SS	Spermatid
859	ENSMUSG00000064284	Cdpf1	chr15	-	A5SS	Spermatid
860	ENSMUSG00000041763	Tpp2	chr1	+	A5SS	Spermatid
861	ENSMUSG00000032064	Dixdc1	chr9	-	A5SS	Spermatid
862	ENSMUSG00000075595	Zfp652	chr11	+	A5SS	Spermatid
863	ENSMUSG00000097333	Zfp87	chr13	-	A5SS	Spermatid
864	ENSMUSG00000071657	Bscl2	chr19	+	A5SS	Spermatid
865	ENSMUSG00000002797	Ggct	chr6	-	A5SS	Spermatid
866	ENSMUSG00000042489	Clspn	chr4	+	A5SS	Spermatid
867	ENSMUSG00000061689	Dlgap4	chr2	+	A5SS	Spermatid
868	ENSMUSG00000020069	Hnrnph3	chr10	-	A5SS	Spermatid
869	ENSMUSG00000006289	Osgep	chr14	-	A5SS	Spermatid
870	ENSMUSG00000030104	Edem1	chr6	+	A5SS	Spermatid
871	ENSMUSG00000063550	Nup98	chr7	-	A5SS	Spermatid
872	ENSMUSG00000007411	Mark3	chr12	+	A5SS	Spermatid
873	ENSMUSG00000021714	Cenpk	chr13	+	A5SS	Spermatid
874	ENSMUSG00000040690	Col16a1	chr4	+	A5SS	Spermatid
875	ENSMUSG00000024943	Smc5	chr19	-	A5SS	Spermatid
876	ENSMUSG00000046230	Vps13a	chr19	-	A5SS	Spermatid
877	ENSMUSG00000020659	Cbll1	chr12	-	A5SS	Spermatid
878	ENSMUSG00000042744	Hectd4	chr5	+	A5SS	Spermatid
879	ENSMUSG00000026790	Odf2	chr2	+	A5SS	Spermatid
880	ENSMUSG00000028677	Rnf220	chr4	-	A5SS	Spermatid
881	ENSMUSG00000027405	Nop56	chr2	+	A5SS	Spermatid
882	ENSMUSG00000039463	Slc9a8	chr2	+	A5SS	Spermatid
883	ENSMUSG00000037475	Thoc2	chrX	-	A5SS	Spermatid
884	ENSMUSG00000028107	Tars2	chr3	-	A5SS	Spermatid
885	ENSMUSG00000026987	Baz2b	chr2	-	A5SS	Spermatid
886	ENSMUSG00000041420	Meis3	chr7	+	A5SS	Spermatid
887	ENSMUSG00000039748	Exo1	chr1	+	A5SS	Spermatid
888	ENSMUSG00000070424	Art5	chr7	-	A5SS	Spermatid
889	ENSMUSG00000032827	Ppp1r9a	chr6	+	A5SS	Spermatid
890	ENSMUSG00000033961	Zfp446	chr7	+	A5SS	Spermatid
891	ENSMUSG00000022377	Asap1	chr15	-	A5SS	Spermatid
892	ENSMUSG00000027829	Ccnl1	chr3	-	A5SS	Spermatid
893	ENSMUSG00000018501	Ncor1	chr11	-	A5SS	Spermatid
894	ENSMUSG00000040721	Zfhx2	chr14	-	A5SS	Spermatid
895	ENSMUSG00000078923	Ube2v1	chr2	-	A5SS	Spermatid
896	ENSMUSG00000032316	Clk3	chr9	-	A5SS	Spermatid
897	ENSMUSG00000032641	Gpr19	chr6	-	A5SS	Spermatid
898	ENSMUSG00000024188	Luc7l	chr17	+	A5SS	Spermatid
899	ENSMUSG00000038828	Tmem214	chr5	+	A5SS	Spermatid
900	ENSMUSG00000034211	Mrps17	chr5	+	A5SS	Spermatid
901	ENSMUSG00000012609	Ttll5	chr12	+	A5SS	Spermatid
902	ENSMUSG00000031167	Rbm3	chrX	-	A5SS	Spermatid
903	ENSMUSG00000034248	Slc25a37	chr14	-	A5SS	Spermatid
904	ENSMUSG00000021156	Zmynd11	chr13	-	A5SS	Spermatid
905	ENSMUSG00000006335	Tfpt	chr7	-	A5SS	Spermatid
906	ENSMUSG00000004561	Mettl17	chr14	+	A5SS	Spermatid
907	ENSMUSG00000019978	Epb41l2	chr10	+	A5SS	Spermatid
908	ENSMUSG00000040813	Tex264	chr9	-	A5SS	Spermatid
909	ENSMUSG00000037022	Mmaa	chr8	-	A5SS	Spermatid
910	ENSMUSG00000024299	Adamts10	chr17	+	A5SS	Spermatid
911	ENSMUSG00000027708	Dcun1d1	chr3	-	A5SS	Spermatid
912	ENSMUSG00000020818	Mfsd11	chr11	+	A5SS	Spermatid
913	ENSMUSG00000027881	Prpf38b	chr3	-	A5SS	Spermatid
914	ENSMUSG00000007050	Lsm2	chr17	+	A5SS	Spermatid
915	ENSMUSG00000043510	Hscb	chr5	-	A5SS	Spermatid
916	ENSMUSG00000066037	Hnrnpr	chr4	+	A5SS	Spermatid
917	ENSMUSG00000001416	Cct3	chr3	+	A5SS	Spermatid
918	ENSMUSG00000000148	Brat1	chr5	+	A5SS	Spermatid
919	ENSMUSG00000066456	Hmgn3	chr9	-	A5SS	Spermatid
920	ENSMUSG00000000916	Nsun5	chr5	+	A5SS	Spermatid
921	ENSMUSG00000031381	Piga	chrX	+	A5SS	Spermatid
922	ENSMUSG00000058298	Mcm9	chr10	-	A5SS	Spermatid
923	ENSMUSG00000001248	Gramd1a	chr7	-	A5SS	Spermatid
924	ENSMUSG00000049482	Ctu2	chr8	+	A5SS	Spermatid
925	ENSMUSG00000026867	Gapvd1	chr2	-	A5SS	Spermatid
926	ENSMUSG00000037971	1110032A03Rik	chr9	-	A5SS	Spermatid
927	ENSMUSG00000036411	9530077C05Rik	chr9	+	A5SS	Spermatid
928	ENSMUSG00000003161	Sri	chr5	+	A5SS	Spermatid
929	ENSMUSG00000022864	D16Ertd472e	chr16	-	A5SS	Spermatid
930	ENSMUSG00000026883	Dab2ip	chr2	+	A5SS	Spermatid
931	ENSMUSG00000069631	Strada	chr11	-	A5SS	Spermatid
932	ENSMUSG00000031885	Cbfb	chr8	+	A5SS	Spermatid
933	ENSMUSG00000030759	Far1	chr7	+	A5SS	Spermatid
934	ENSMUSG00000005893	Nr2c2	chr6	+	A5SS	Spermatid
935	ENSMUSG00000031626	Sorbs2	chr8	+	A5SS	Spermatid
936	ENSMUSG00000063108	Zfp26	chr9	-	A5SS	Spermatid
937	ENSMUSG00000021262	Evl	chr12	+	A5SS	Spermatid
938	ENSMUSG00000032336	Nptn	chr9	+	A5SS	Spermatid
939	ENSMUSG00000036054	Sugp2	chr8	+	A5SS	Spermatid
940	ENSMUSG00000029454	Mapkapk5	chr5	-	A5SS	Spermatid
941	ENSMUSG00000047090	Tmem198b	chr10	-	A5SS	Spermatid
942	ENSMUSG00000028580	Pum1	chr4	+	A5SS	Spermatid
943	ENSMUSG00000057541	Pus7	chr5	-	A5SS	Spermatid
944	ENSMUSG00000025377	Tepsin	chr11	-	A5SS	Spermatid
945	ENSMUSG00000063511	Snrnp70	chr7	-	A5SS	Spermatid
946	ENSMUSG00000032745	Gpbp1	chr13	-	A5SS	Spermatid
947	ENSMUSG00000030714	Sgf29	chr7	+	A5SS	Spermatid
948	ENSMUSG00000020770	Unk	chr11	+	A5SS	Spermatid
949	ENSMUSG00000029502	Golga3	chr5	+	A5SS	Spermatid
950	ENSMUSG00000015087	Rabl6	chr2	-	A5SS	Spermatid
951	ENSMUSG00000030322	Mbd4	chr6	-	A5SS	Spermatid
952	ENSMUSG00000062929	Cfl2	chr12	-	A5SS	Spermatid
953	ENSMUSG00000047731	Wbp1l	chr19	+	A5SS	Spermatid
954	ENSMUSG00000025915	Sgk3	chr1	+	A5SS	Spermatid
955	ENSMUSG00000030960	Eef1akmt2	chr7	-	A5SS	Spermatid
956	ENSMUSG00000041528	Rnf123	chr9	-	A5SS	Spermatid
957	ENSMUSG00000022961	Son	chr16	+	A5SS	Spermatid
958	ENSMUSG00000029098	Acox3	chr5	+	A5SS	Spermatid
959	ENSMUSG00000078350	Smim1	chr4	-	A5SS	Spermatid
960	ENSMUSG00000035696	Rnf38	chr4	-	A5SS	Spermatid
961	ENSMUSG00000057894	Zfp329	chr7	-	A5SS	Spermatid
962	ENSMUSG00000019936	Epyc	chr10	+	MXE	Spermatid
963	ENSMUSG00000018697	Aatf	chr11	-	MXE	Spermatid
964	ENSMUSG00000079334	Nat6	chr9	+	MXE	Spermatid
965	ENSMUSG00000038388	Mpp6	chr6	+	MXE	Spermatid
966	ENSMUSG00000022617	Chkb	chr15	-	MXE	Spermatid
967	ENSMUSG00000056342	Usp34	chr11	+	MXE	Spermatid
968	ENSMUSG00000036138	Acaa1a	chr9	+	MXE	Spermatid
969	ENSMUSG00000038914	Dido1	chr2	-	MXE	Spermatid
970	ENSMUSG00000022092	Ppp3cc	chr14	-	MXE	Spermatid
971	ENSMUSG00000022884	Eif4a2	chr16	+	MXE	Spermatid
972	ENSMUSG00000041890	Git2	chr5	-	MXE	Spermatid
973	ENSMUSG00000002885	Adgre5	chr8	-	MXE	Spermatid
974	ENSMUSG00000028800	Hdac1	chr4	-	MXE	Spermatid
975	ENSMUSG00000002835	Chaf1a	chr17	+	MXE	Spermatid
976	ENSMUSG00000046364	Rpl27a	chr7	+	MXE	Spermatid
977	ENSMUSG00000037519	Ppfia1	chr7	-	MXE	Spermatid
978	ENSMUSG00000066568	Lsm14a	chr7	-	MXE	Spermatid
979	ENSMUSG00000020882	Cacnb1	chr11	-	MXE	Spermatid
980	ENSMUSG00000043940	Wdfy3	chr5	-	MXE	Spermatid
981	ENSMUSG00000026782	Abi2	chr1	+	MXE	Spermatid
982	ENSMUSG00000018412	Kansl1	chr11	-	MXE	Spermatid
983	ENSMUSG00000027667	Zfp639	chr3	+	MXE	Spermatid
984	ENSMUSG00000026159	Agfg1	chr1	+	MXE	Spermatid
985	ENSMUSG00000020521	Rnft1	chr11	+	MXE	Spermatid
986	ENSMUSG00000020740	Gga3	chr11	-	MXE	Spermatid
987	ENSMUSG00000032307	Ube2q2	chr9	+	MXE	Spermatid
988	ENSMUSG00000032366	Tpm1	chr9	-	MXE	Spermatid
989	ENSMUSG00000025234	Arih1	chr9	-	MXE	Spermatid
990	ENSMUSG00000061477	Rps7	chr12	-	MXE	Spermatid
991	ENSMUSG00000033365	Ipo13	chr4	-	MXE	Spermatid
992	ENSMUSG00000051950	B3glct	chr5	+	MXE	Spermatid
993	ENSMUSG00000022515	Anks3	chr16	-	MXE	Spermatid
994	ENSMUSG00000038954	Supt3	chr17	+	MXE	Spermatid
995	ENSMUSG00000001285	Myg1	chr15	+	MXE	Spermatid
996	ENSMUSG00000029922	Mkrn1	chr6	-	MXE	Spermatid
997	ENSMUSG00000029505	Ep400	chr5	-	MXE	Spermatid
998	ENSMUSG00000052707	Tnrc6a	chr7	+	MXE	Spermatid
999	ENSMUSG00000021816	Ppp3cb	chr14	-	MXE	Spermatid
1000	ENSMUSG00000037742	Eef1a1	chr9	-	MXE	Spermatid
1001	ENSMUSG00000021495	Fam193b	chr13	-	MXE	Spermatid
1002	ENSMUSG00000028264	Spaca1	chr4	-	MXE	Spermatid
1003	ENSMUSG00000035310	Lin54	chr5	-	MXE	Spermatid
1004	ENSMUSG00000020100	Slc29a3	chr10	-	MXE	Spermatid
1005	ENSMUSG00000028792	Ak2	chr4	+	MXE	Spermatid
1006	ENSMUSG00000041540	Sox5	chr6	-	MXE	Spermatid
1007	ENSMUSG00000037669	Ldah	chr12	+	MXE	Spermatid
1008	ENSMUSG00000039530	Tusc3	chr8	+	MXE	Spermatid
1009	ENSMUSG00000041431	Ccnb1	chr13	-	MXE	Spermatid
1010	ENSMUSG00000079557	March2	chr17	-	MXE	Spermatid
1011	ENSMUSG00000020253	Ppm1m	chr9	-	MXE	Spermatid
1012	ENSMUSG00000037375	Hhat	chr1	-	MXE	Spermatid
1013	ENSMUSG00000043789	Vwce	chr19	+	MXE	Spermatid
1014	ENSMUSG00000090626	Tex9	chr9	-	MXE	Spermatid
1015	ENSMUSG00000037605	Adgrl3	chr5	+	MXE	Spermatid
1016	ENSMUSG00000038696	Mapkap1	chr2	+	MXE	Spermatid
1017	ENSMUSG00000022032	Scara5	chr14	+	MXE	Spermatid
1018	ENSMUSG00000024921	Smarca2	chr19	+	MXE	Spermatid
1019	ENSMUSG00000069855	Slc47a2	chr11	-	MXE	Spermatid
1020	ENSMUSG00000008976	Gabpa	chr16	+	MXE	Spermatid
1021	ENSMUSG00000019916	P4ha1	chr10	+	MXE	Spermatid
1022	ENSMUSG00000001089	Luzp1	chr4	+	MXE	Spermatid
1023	ENSMUSG00000022771	Ppil2	chr16	-	MXE	Spermatid
1024	ENSMUSG00000035248	Zcchc6	chr13	-	MXE	Spermatid
1025	ENSMUSG00000022779	Top3b	chr16	+	MXE	Spermatid
1026	ENSMUSG00000029769	Ccdc136	chr6	+	MXE	Spermatid
1027	ENSMUSG00000030067	Foxp1	chr6	-	MXE	Spermatid
1028	ENSMUSG00000063889	Crem	chr18	-	MXE	Spermatid
1029	ENSMUSG00000020716	Nf1	chr11	+	MXE	Spermatid
1030	ENSMUSG00000060450	Rnf14	chr18	+	MXE	Spermatid
1031	ENSMUSG00000020361	Hspa4	chr11	-	MXE	Spermatid
1032	ENSMUSG00000034544	Rsrc1	chr3	+	MXE	Spermatid
1033	ENSMUSG00000001415	Smg5	chr3	+	MXE	Spermatid
1034	ENSMUSG00000052299	Ltn1	chr16	-	MXE	Spermatid
1035	ENSMUSG00000030007	Cct7	chr6	+	MXE	Spermatid
1036	ENSMUSG00000021007	Spata7	chr12	+	MXE	Spermatid
1037	ENSMUSG00000033257	Ttll4	chr1	+	MXE	Spermatid
1038	ENSMUSG00000027408	Cpxm1	chr2	-	MXE	Spermatid
1039	ENSMUSG00000045983	Eif4g1	chr16	+	MXE	Spermatid
1040	ENSMUSG00000029521	Chek2	chr5	+	MXE	Spermatid
1041	ENSMUSG00000021144	Mta1	chr12	+	MXE	Spermatid
1042	ENSMUSG00000005610	Eif4g2	chr7	-	MXE	Spermatid
1043	ENSMUSG00000024908	Ppp6r3	chr19	-	MXE	Spermatid
1044	ENSMUSG00000061887	Ssbp3	chr4	+	MXE	Spermatid
1045	ENSMUSG00000043241	Upf2	chr2	+	MXE	Spermatid
1046	ENSMUSG00000032637	Atxn2l	chr7	-	MXE	Spermatid
1047	ENSMUSG00000000365	Rnf17	chr14	+	MXE	Spermatid
1048	ENSMUSG00000021196	Pfkp	chr13	-	MXE	Spermatid
1049	ENSMUSG00000033128	Gga1	chr15	+	MXE	Spermatid
1050	ENSMUSG00000052139	Babam2	chr5	+	MXE	Spermatid
1051	ENSMUSG00000051427	Ccdc157	chr11	-	MXE	Spermatid
1052	ENSMUSG00000057110	Cntrl	chr2	+	MXE	Spermatid
1053	ENSMUSG00000035126	Wdr78	chr4	-	MXE	Spermatid
1054	ENSMUSG00000015937	H2afy	chr13	-	MXE	Spermatid
1055	ENSMUSG00000039648	Kyat1	chr2	-	MXE	Spermatid
1056	ENSMUSG00000035236	Scai	chr2	-	MXE	Spermatid
1057	ENSMUSG00000028789	Azin2	chr4	-	MXE	Spermatid
1058	ENSMUSG00000022772	Senp5	chr16	-	MXE	Spermatid
1059	ENSMUSG00000044320	1700001O22Rik	chr2	-	MXE	Spermatid
1060	ENSMUSG00000005873	Reep5	chr18	-	MXE	Spermatid
1061	ENSMUSG00000032534	Cep63	chr9	-	MXE	Spermatid
1062	ENSMUSG00000021140	Pcnx	chr12	+	MXE	Spermatid
1063	ENSMUSG00000020898	Ctc1	chr11	+	MXE	Spermatid
1064	ENSMUSG00000032855	Pkd1	chr17	+	MXE	Spermatid
1065	ENSMUSG00000047454	Gphn	chr12	+	MXE	Spermatid
1066	ENSMUSG00000047141	Zfp654	chr16	-	MXE	Spermatid
1067	ENSMUSG00000038371	Sbf2	chr7	-	MXE	Spermatid
1068	ENSMUSG00000005656	Snx6	chr12	-	MXE	Spermatid
1069	ENSMUSG00000013662	Atad1	chr19	-	MXE	Spermatid
1070	ENSMUSG00000028234	Rps20	chr4	-	MXE	Spermatid
1071	ENSMUSG00000038290	Smg6	chr11	+	MXE	Spermatid
1072	ENSMUSG00000022391	Rangap1	chr15	-	MXE	Spermatid
1073	ENSMUSG00000004319	Clcn3	chr8	-	MXE	Spermatid
1074	ENSMUSG00000027014	Cwc22	chr2	-	MXE	Spermatid
1075	ENSMUSG00000059119	Nap1l4	chr7	-	MXE	Spermatid
1076	ENSMUSG00000030990	Pgap2	chr7	+	MXE	Spermatid
1077	ENSMUSG00000035901	Dennd5a	chr7	-	MXE	Spermatid
1078	ENSMUSG00000013878	Rnf170	chr8	+	MXE	Spermatid
1079	ENSMUSG00000040263	Klhdc4	chr8	-	MXE	Spermatid
1080	ENSMUSG00000064215	Ifi27	chr12	+	MXE	Spermatid
1081	ENSMUSG00000018554	Ybx2	chr11	+	MXE	Spermatid
1082	ENSMUSG00000036693	Nop14	chr5	-	MXE	Spermatid
1083	ENSMUSG00000022770	Dlg1	chr16	+	MXE	Spermatid
1084	ENSMUSG00000024260	Sap130	chr18	+	MXE	Spermatid
1085	ENSMUSG00000071172	Srsf3	chr17	+	MXE	Spermatid
1086	ENSMUSG00000005362	Crbn	chr6	-	MXE	Spermatid
1087	ENSMUSG00000029068	Ccnl2	chr4	+	MXE	Spermatid
1088	ENSMUSG00000028772	Zcchc17	chr4	-	MXE	Spermatid
1089	ENSMUSG00000020978	Klhdc2	chr12	+	MXE	Spermatid
1090	ENSMUSG00000021072	Tmx1	chr12	+	MXE	Spermatid
1091	ENSMUSG00000021891	Mettl6	chr14	-	MXE	Spermatid
1092	ENSMUSG00000002660	Clpp	chr17	+	MXE	Spermatid
1093	ENSMUSG00000038671	Arfrp1	chr2	-	MXE	Spermatid
1094	ENSMUSG00000030768	Disp1	chr1	-	MXE	Spermatid
1095	ENSMUSG00000023883	Phf10	chr17	-	MXE	Spermatid
1096	ENSMUSG00000059669	Taf1b	chr12	+	MXE	Spermatid
1097	ENSMUSG00000040729	Cep126	chr9	-	MXE	Spermatid
1098	ENSMUSG00000028700	Pomgnt1	chr4	+	MXE	Spermatid
1099	ENSMUSG00000064127	Med14	chrX	-	MXE	Spermatid
1100	ENSMUSG00000074579	Lekr1	chr3	+	MXE	Spermatid
1101	ENSMUSG00000044566	Cage1	chr13	-	MXE	Spermatid
1102	ENSMUSG00000027940	Tpm3	chr3	+	MXE	Spermatid
1103	ENSMUSG00000033502	Cdc14a	chr3	-	MXE	Spermatid
1104	ENSMUSG00000073077	Gm7173	chrX	-	MXE	Spermatid
1105	ENSMUSG00000063052	Lrrc40	chr3	+	MXE	Spermatid
1106	ENSMUSG00000027751	Supt20	chr3	+	MXE	Spermatid
1107	ENSMUSG00000079084	Ccdc82	chr9	+	MXE	Spermatid
1108	ENSMUSG00000038773	Kdm3b	chr18	+	MXE	Spermatid
1109	ENSMUSG00000060510	Zfp266	chr9	-	MXE	Spermatid
1110	ENSMUSG00000059586	Nsmce2	chr15	+	MXE	Spermatid
1111	ENSMUSG00000026558	Uck2	chr1	-	MXE	Spermatid
1112	ENSMUSG00000019951	Uhrf1bp1l	chr10	+	MXE	Spermatid
1113	ENSMUSG00000071454	Dtnb	chr12	+	MXE	Spermatid
1114	ENSMUSG00000022280	Rnf19a	chr15	-	MXE	Spermatid
1115	ENSMUSG00000003778	Brd8	chr18	-	MXE	Spermatid
1116	ENSMUSG00000031310	Zmym3	chrX	-	MXE	Spermatid
1117	ENSMUSG00000015697	Setdb1	chr3	-	MXE	Spermatid
1118	ENSMUSG00000029403	Cdkl2	chr5	-	MXE	Spermatid
1119	ENSMUSG00000040021	Lats1	chr10	+	MXE	Spermatid
1120	ENSMUSG00000028256	Odf2l	chr3	+	MXE	Spermatid
1121	ENSMUSG00000019795	Pcmt1	chr10	-	MXE	Spermatid
1122	ENSMUSG00000022091	Sorbs3	chr14	-	MXE	Spermatid
1123	ENSMUSG00000064181	Rab3ip	chr10	-	MXE	Spermatid
1124	ENSMUSG00000019863	Qrsl1	chr10	-	MXE	Spermatid
1125	ENSMUSG00000029640	Usp12	chr5	-	MXE	Spermatid
1126	ENSMUSG00000037112	Sik2	chr9	-	MXE	Spermatid
1127	ENSMUSG00000030584	Dpf1	chr7	+	MXE	Spermatid
1128	ENSMUSG00000020954	Strn3	chr12	-	MXE	Spermatid
1129	ENSMUSG00000020914	Top2a	chr11	-	MXE	Spermatid
1130	ENSMUSG00000026584	Scyl3	chr1	+	MXE	Spermatid
1131	ENSMUSG00000020078	Vps26a	chr10	-	MXE	Spermatid
1132	ENSMUSG00000022228	Zscan26	chr13	-	MXE	Spermatid
1133	ENSMUSG00000045103	Dmd	chrX	+	MXE	Spermatid
1134	ENSMUSG00000044252	Osbpl1a	chr18	-	MXE	Spermatid
1135	ENSMUSG00000028964	Park7	chr4	-	MXE	Spermatid
1136	ENSMUSG00000020612	Prkar1a	chr11	+	MXE	Spermatid
1137	ENSMUSG00000030089	Slc41a3	chr6	+	MXE	Spermatid
1138	ENSMUSG00000024563	Smad2	chr18	+	MXE	Spermatid
1139	ENSMUSG00000022540	Rogdi	chr16	-	MXE	Spermatid
1140	ENSMUSG00000074129	Rpl13a	chr7	-	MXE	Spermatid
1141	ENSMUSG00000025558	Dock9	chr14	-	MXE	Spermatid
1142	ENSMUSG00000021244	Ylpm1	chr12	+	MXE	Spermatid
1143	ENSMUSG00000023984	Gm20517	chr17	+	MXE	Spermatid
1144	ENSMUSG00000019966	Kitl	chr10	+	MXE	Spermatid
1145	ENSMUSG00000052997	Uba2	chr7	-	MXE	Spermatid
1146	ENSMUSG00000039599	Fam149b	chr14	+	MXE	Spermatid
1147	ENSMUSG00000021709	Erbin	chr13	-	MXE	Spermatid
1148	ENSMUSG00000061130	Ppm1b	chr17	+	MXE	Spermatid
1149	ENSMUSG00000040667	Nup88	chr11	-	MXE	Spermatid
1150	ENSMUSG00000026200	Glb1l	chr1	-	MXE	Spermatid
1151	ENSMUSG00000030231	Plekha5	chr6	+	MXE	Spermatid
1152	ENSMUSG00000018677	Slc25a39	chr11	-	MXE	Spermatid
1153	ENSMUSG00000051910	Sox6	chr7	-	MXE	Spermatid
1154	ENSMUSG00000039697	Ncoa7	chr10	-	MXE	Spermatid
1155	ENSMUSG00000026927	Sdccag3	chr2	-	MXE	Spermatid
1156	ENSMUSG00000020982	Nemf	chr12	-	MXE	Spermatid
1157	ENSMUSG00000040875	Osbpl10	chr9	+	MXE	Spermatid
1158	ENSMUSG00000022995	Enah	chr1	-	MXE	Spermatid
1159	ENSMUSG00000025512	Chid1	chr7	-	MXE	Spermatid
1160	ENSMUSG00000025793	Hgs	chr11	+	MXE	Spermatid
1161	ENSMUSG00000066839	Ecsit	chr9	-	MXE	Spermatid
1162	ENSMUSG00000025860	Xiap	chrX	+	MXE	Spermatid
1163	ENSMUSG00000063065	Mapk3	chr7	+	MXE	Spermatid
1164	ENSMUSG00000098950	Gm28036	chr2	-	MXE	Spermatid
1165	ENSMUSG00000028156	Eif4e	chr3	+	MXE	Spermatid
1166	ENSMUSG00000061904	Slc25a3	chr10	-	MXE	Spermatid
1167	ENSMUSG00000028637	Ccdc30	chr4	-	MXE	Spermatid
1168	ENSMUSG00000029267	Mtf2	chr5	+	MXE	Spermatid
1169	ENSMUSG00000030435	U2af2	chr7	+	MXE	Spermatid
1170	ENSMUSG00000014907	Naf1	chr8	+	MXE	Spermatid
1171	ENSMUSG00000020389	Cdkl3	chr11	+	MXE	Spermatid
1172	ENSMUSG00000044477	Zfand3	chr17	+	MXE	Spermatid
1173	ENSMUSG00000071337	Tia1	chr6	+	MXE	Spermatid
1174	ENSMUSG00000028975	Pex14	chr4	-	MXE	Spermatid
1175	ENSMUSG00000069094	Pde7a	chr3	-	MXE	Spermatid
1176	ENSMUSG00000036792	Mbd5	chr2	+	MXE	Spermatid
1177	ENSMUSG00000026131	Dst	chr1	+	MXE	Spermatid
1178	ENSMUSG00000038481	Cdk19	chr10	+	MXE	Spermatid
1179	ENSMUSG00000061759	Armt1	chr10	+	MXE	Spermatid
1180	ENSMUSG00000069755	Zfp125	chr12	-	MXE	Spermatid
1181	ENSMUSG00000029775	Klhdc10	chr6	+	MXE	Spermatid
1182	ENSMUSG00000024165	Hn1l	chr17	-	MXE	Spermatid
1183	ENSMUSG00000058729	Lin9	chr1	+	MXE	Spermatid
1184	ENSMUSG00000024743	Syt7	chr19	+	MXE	Spermatid
1185	ENSMUSG00000046519	Golph3l	chr3	+	MXE	Spermatid
1186	ENSMUSG00000042719	Naa25	chr5	+	MXE	Spermatid
1187	ENSMUSG00000033411	Ctdspl2	chr2	+	MXE	Spermatid
1188	ENSMUSG00000004562	Arhgef40	chr14	+	MXE	Spermatid
1189	ENSMUSG00000022021	Diaph3	chr14	-	MXE	Spermatid
1190	ENSMUSG00000026991	Pkp4	chr2	+	MXE	Spermatid
[truncated: 4,204 more rows]
